# Supplementary material for: One-pot, room-temperature conversion of dinitrogen to ammonium chloride at a main-group element
Source: Springer Nature journal article supplement (doi:10.1038/s41557-020-0520-6), 2020-09-14
Supplement: 41557_2020_520_MOESM9_ESM.cif [file 41557_2020_520_MOESM9_ESM.cif]

 
data_BNHK
 
_audit_creation_method            'SHELXL-2018/3'
_shelx_SHELXL_version_number      '2018/3'
_chemical_name_systematic         ?
_chemical_name_common             ?
_chemical_melting_point           ?
_chemical_formula_moiety          ?
_chemical_formula_sum
 'C60 H90 B2 K2 N4' 
_chemical_formula_weight          967.17

loop_
 _atom_type_symbol
 _atom_type_description
 _atom_type_scat_dispersion_real
 _atom_type_scat_dispersion_imag
 _atom_type_scat_source
 'C'  'C'   0.0181   0.0091
 'International Tables Vol C Tables 4.2.6.8 and 6.1.1.4'
 'H'  'H'   0.0000   0.0000
 'International Tables Vol C Tables 4.2.6.8 and 6.1.1.4'
 'B'  'B'   0.0090   0.0039
 'International Tables Vol C Tables 4.2.6.8 and 6.1.1.4'
 'N'  'N'   0.0311   0.0180
 'International Tables Vol C Tables 4.2.6.8 and 6.1.1.4'
 'K'  'K'   0.3868   1.0657
 'International Tables Vol C Tables 4.2.6.8 and 6.1.1.4'
 
_space_group_crystal_system       triclinic
_space_group_IT_number            2
_space_group_name_H-M_alt         'P -1'
_space_group_name_Hall            '-P 1'
 
_shelx_space_group_comment
;
The symmetry employed for this shelxl refinement is uniquely defined
by the following loop, which should always be used as a source of
symmetry information in preference to the above space-group names.
They are only intended as comments.
;
 
loop_
 _space_group_symop_operation_xyz
 'x, y, z'
 '-x, -y, -z'
 
_cell_length_a                    10.7085(2)
_cell_length_b                    16.6116(3)
_cell_length_c                    18.0545(4)
_cell_angle_alpha                 69.131(2)
_cell_angle_beta                  89.791(2)
_cell_angle_gamma                 74.733(2)
_cell_volume                      2880.52(11)
_cell_formula_units_Z             2
_cell_measurement_temperature     100(2)
_cell_measurement_reflns_used   29916
_cell_measurement_theta_min     2.6560
_cell_measurement_theta_max     76.4900
 
_exptl_crystal_description        blade
_exptl_crystal_colour             bronze
_exptl_crystal_density_meas       ?
_exptl_crystal_density_method     ?
_exptl_crystal_density_diffrn     1.115          
_exptl_crystal_F_000              1052
_exptl_transmission_factor_min    ?
_exptl_transmission_factor_max    ?
_exptl_crystal_size_max                             0.193
_exptl_crystal_size_mid                             0.050
_exptl_crystal_size_min                             0.039
_exptl_absorpt_coefficient_mu                       1.736
_exptl_absorpt_correction_T_min                     0.701
_exptl_absorpt_correction_T_max                     1.000
_exptl_absorpt_correction_type            gaussian
_exptl_absorpt_process_details
;
CrysAlisPro 1.171.40.57a (Rigaku Oxford Diffraction, 2019)
Numerical absorption correction based on gaussian integration over
			a multifaceted crystal model
Empirical absorption correction using spherical harmonics,
 implemented in SCALE3 ABSPACK scaling algorithm.
;
_oxdiff_exptl_absorpt_empirical_full_min           0.667
_oxdiff_exptl_absorpt_empirical_full_max           1.868
_oxdiff_exptl_absorpt_empirical_details
;
Empirical correction (ABSPACK) includes:
- Absorption correction using spherical harmonics
- Frame scaling
;
_diffrn_ambient_temperature       100(2)
_diffrn_radiation_wavelength      1.54184
_diffrn_radiation_type            CuK\a
_diffrn_source 'micro-focus sealed X-ray tube'
_diffrn_source_type 'PhotonJet (Cu) X-ray Source'
_diffrn_radiation_monochromator mirror
_diffrn_measurement_device 'four-circle diffractometer'
_diffrn_measurement_device_type 'XtaLAB Synergy, Dualflex, HyPix'
_diffrn_detector 'Hybrid Pixel Array Detector'
_diffrn_detector_type HyPix
_diffrn_reflns_number             70197
_diffrn_reflns_av_unetI/netI      0.0356
_diffrn_reflns_av_R_equivalents   0.0589
_diffrn_reflns_limit_h_min        -11
_diffrn_reflns_limit_h_max        13
_diffrn_reflns_limit_k_min        -20
_diffrn_reflns_limit_k_max        20
_diffrn_reflns_limit_l_min        -22
_diffrn_reflns_limit_l_max        21
_diffrn_reflns_theta_min          2.632
_diffrn_reflns_theta_max          70.075
_diffrn_reflns_theta_full         67.684
_diffrn_measured_fraction_theta_max   1.000
_diffrn_measured_fraction_theta_full  1.000
_diffrn_reflns_Laue_measured_fraction_max    1.000
_diffrn_reflns_Laue_measured_fraction_full   1.000
_diffrn_reflns_point_group_measured_fraction_max   1.000
_diffrn_reflns_point_group_measured_fraction_full  1.000
_reflns_number_total              10919
_reflns_number_gt                 9554
_reflns_threshold_expression      'I > 2\s(I)'
_reflns_Friedel_coverage          0.000
_reflns_Friedel_fraction_max      .
_reflns_Friedel_fraction_full     .
 
_reflns_special_details
;
 Reflections were merged by SHELXL according to the crystal
 class for the calculation of statistics and refinement.
 
 _reflns_Friedel_fraction is defined as the number of unique
 Friedel pairs measured divided by the number that would be
 possible theoretically, ignoring centric projections and
 systematic absences.
;
 
_computing_data_collection        ?
_computing_cell_refinement        ?
_computing_data_reduction         ?
_computing_structure_solution     'SHELXT 2014/5 (Sheldrick, 2014)'
_computing_structure_refinement 'SHELXL-2018/3 (Sheldrick, 2018)'
_computing_molecular_graphics     ?
_computing_publication_material   ?
_refine_special_details           ?
_refine_ls_structure_factor_coef  Fsqd
_refine_ls_matrix_type            full
_refine_ls_weighting_scheme       calc
_refine_ls_weighting_details
'w=1/[\s^2^(Fo^2^)+(0.0627P)^2^+1.5899P] where P=(Fo^2^+2Fc^2^)/3'
_atom_sites_solution_primary      dual
_atom_sites_solution_secondary    ?
_atom_sites_solution_hydrogens    mixed
_refine_ls_hydrogen_treatment     mixed
_refine_ls_extinction_method      none
_refine_ls_extinction_coef        .
_refine_ls_number_reflns          10919
_refine_ls_number_parameters      645
_refine_ls_number_restraints      2
_refine_ls_R_factor_all           0.0551
_refine_ls_R_factor_gt            0.0479
_refine_ls_wR_factor_ref          0.1249
_refine_ls_wR_factor_gt           0.1208
_refine_ls_goodness_of_fit_ref    1.020
_refine_ls_restrained_S_all       1.020
_refine_ls_shift/su_max           0.001
_refine_ls_shift/su_mean          0.000
 
loop_
 _atom_site_label
 _atom_site_type_symbol
 _atom_site_fract_x
 _atom_site_fract_y
 _atom_site_fract_z
 _atom_site_U_iso_or_equiv
 _atom_site_adp_type
 _atom_site_occupancy
 _atom_site_site_symmetry_order  
 _atom_site_calc_flag
 _atom_site_refinement_flags_posn
 _atom_site_refinement_flags_adp
 _atom_site_refinement_flags_occupancy
 _atom_site_disorder_assembly
 _atom_site_disorder_group
C00Q C 0.64389(17) 0.41811(12) 0.46624(11) 0.0273(4) Uani 1 1 d . . . . .
H00A H 0.691721 0.359753 0.505832 0.041 Uiso 1 1 calc R U . . .
H00C H 0.632333 0.412193 0.414785 0.041 Uiso 1 1 calc R U . . .
H00D H 0.558522 0.438762 0.483563 0.041 Uiso 1 1 calc R U . . .
C00R C 0.85803(19) 0.65168(13) 0.29736(12) 0.0326(4) Uani 1 1 d . . . . .
H00E H 0.952681 0.640891 0.299824 0.049 Uiso 1 1 calc R U . . .
H00F H 0.816124 0.715696 0.284664 0.049 Uiso 1 1 calc R U . . .
H00G H 0.829007 0.633406 0.255961 0.049 Uiso 1 1 calc R U . . .
C01D C 0.93107(18) 0.67906(15) 0.44080(15) 0.0379(5) Uani 1 1 d . . . . .
H01T H 0.931811 0.688047 0.491564 0.057 Uiso 1 1 calc R U . . .
H01U H 0.889204 0.736357 0.397836 0.057 Uiso 1 1 calc R U . . .
H01V H 1.020633 0.656145 0.430137 0.057 Uiso 1 1 calc R U . . .
C01F C 0.72928(19) 0.44322(15) 0.60831(12) 0.0374(5) Uani 1 1 d . . . . .
H01Z H 0.768483 0.458707 0.648477 0.056 Uiso 1 1 calc R U . . .
H010 H 0.766214 0.379190 0.618597 0.056 Uiso 1 1 calc R U . . .
H011 H 0.634993 0.456272 0.610952 0.056 Uiso 1 1 calc R U . . .
B1_1 B 0.24382(18) 0.91301(13) 0.24717(12) 0.0225(4) Uani 1 1 d . . . . .
H1_1 H 0.343(2) 0.8288(16) 0.3409(11) 0.034(6) Uiso 1 1 d D . . . .
K1_1 K 0.33246(4) 0.72546(3) 0.20686(3) 0.03434(11) Uani 1 1 d . . . . .
C2_1 C 0.09858(16) 1.08435(12) 0.23228(11) 0.0256(4) Uani 1 1 d . . . . .
N2_1 N 0.28103(13) 1.00961(9) 0.32846(9) 0.0218(3) Uani 1 1 d . . . . .
C3_1 C -0.03399(18) 1.06368(14) 0.23552(13) 0.0362(4) Uani 1 1 d . . . . .
H014_1 H -0.104090 1.120028 0.217771 0.054 Uiso 1 1 calc R U . . .
H015_1 H -0.043154 1.027049 0.290317 0.054 Uiso 1 1 calc R U . . .
H016_1 H -0.038959 1.030829 0.200550 0.054 Uiso 1 1 calc R U . . .
C4_1 C 0.1097(2) 1.13824(13) 0.14476(12) 0.0369(5) Uani 1 1 d . . . . .
H017_1 H 0.037637 1.193468 0.125528 0.055 Uiso 1 1 calc R U . . .
H018_1 H 0.106144 1.102135 0.112541 0.055 Uiso 1 1 calc R U . . .
H019_1 H 0.192550 1.153488 0.140381 0.055 Uiso 1 1 calc R U . . .
C5_1 C 0.10517(18) 1.13789(12) 0.28559(11) 0.0288(4) Uani 1 1 d . . . . .
H00H_1 H 0.084405 1.202778 0.253044 0.035 Uiso 1 1 calc R U . . .
H00I_1 H 0.041869 1.128722 0.325730 0.035 Uiso 1 1 calc R U . . .
C6_1 C 0.24409(18) 1.10352(12) 0.32676(12) 0.0289(4) Uani 1 1 d . . . . .
C7_1 C 0.2496(2) 1.10740(14) 0.40951(13) 0.0383(5) Uani 1 1 d . . . . .
H01W_1 H 0.224080 1.170197 0.405137 0.057 Uiso 1 1 calc R U . . .
H01X_1 H 0.338417 1.078102 0.435687 0.057 Uiso 1 1 calc R U . . .
H01Y_1 H 0.189869 1.076409 0.441048 0.057 Uiso 1 1 calc R U . . .
C8_1 C 0.3318(2) 1.15823(14) 0.27711(16) 0.0440(5) Uani 1 1 d . . . . .
H02A_1 H 0.293252 1.222023 0.267180 0.066 Uiso 1 1 calc R U . . .
H02B_1 H 0.339803 1.149562 0.226189 0.066 Uiso 1 1 calc R U . . .
H02C_1 H 0.418168 1.137891 0.306379 0.066 Uiso 1 1 calc R U . . .
C9_1 C 0.36958(16) 0.93680(11) 0.39007(10) 0.0215(3) Uani 1 1 d . . . . .
C10_1 C 0.31994(16) 0.88556(11) 0.45765(10) 0.0224(3) Uani 1 1 d . . . . .
C11_1 C 0.40619(18) 0.81202(12) 0.51628(11) 0.0276(4) Uani 1 1 d . . . . .
H11_1 H 0.373352 0.776500 0.561507 0.033 Uiso 1 1 calc R U . . .
C12_1 C 0.53890(18) 0.79011(13) 0.50947(11) 0.0315(4) Uani 1 1 d . . . . .
H12_1 H 0.596572 0.740429 0.549995 0.038 Uiso 1 1 calc R U . . .
C13_1 C 0.58642(17) 0.84116(14) 0.44327(12) 0.0308(4) Uani 1 1 d . . . . .
H13_1 H 0.677457 0.826466 0.439177 0.037 Uiso 1 1 calc R U . . .
C14_1 C 0.50419(16) 0.91367(12) 0.38235(11) 0.0257(4) Uani 1 1 d . . . . .
C15_1 C 0.17476(17) 0.90519(12) 0.46702(11) 0.0256(4) Uani 1 1 d . . . . .
H15_1 H 0.130372 0.964932 0.425277 0.031 Uiso 1 1 calc R U . . .
C16_1 C 0.11823(18) 0.83544(13) 0.45368(12) 0.0313(4) Uani 1 1 d . . . . .
H01A_1 H 0.023402 0.853799 0.453508 0.047 Uiso 1 1 calc R U . . .
H01B_1 H 0.154536 0.777049 0.496597 0.047 Uiso 1 1 calc R U . . .
H01C_1 H 0.140501 0.830740 0.402398 0.047 Uiso 1 1 calc R U . . .
C17_1 C 0.1457(2) 0.91085(14) 0.54835(12) 0.0339(4) Uani 1 1 d . . . . .
H01D_1 H 0.051437 0.926223 0.551285 0.051 Uiso 1 1 calc R U . . .
H01E_1 H 0.179847 0.957177 0.555397 0.051 Uiso 1 1 calc R U . . .
H01F_1 H 0.187199 0.852772 0.590464 0.051 Uiso 1 1 calc R U . . .
C18_1 C 0.56101(17) 0.96158(14) 0.30749(12) 0.0330(4) Uani 1 1 d . . . . .
H18_1 H 0.488582 1.010906 0.270362 0.040 Uiso 1 1 calc R U . . .
C19_1 C 0.6203(2) 0.89660(16) 0.26581(13) 0.0419(5) Uani 1 1 d . . . . .
H027_1 H 0.651709 0.929063 0.216005 0.063 Uiso 1 1 calc R U . . .
H028_1 H 0.553981 0.870725 0.254077 0.063 Uiso 1 1 calc R U . . .
H029_1 H 0.693088 0.848445 0.300689 0.063 Uiso 1 1 calc R U . . .
C20_1 C 0.6623(2) 1.00351(19) 0.32601(17) 0.0539(6) Uani 1 1 d . . . . .
H02P_1 H 0.690049 1.039095 0.276110 0.081 Uiso 1 1 calc R U . . .
H02Q_1 H 0.737673 0.955885 0.358730 0.081 Uiso 1 1 calc R U . . .
H02R_1 H 0.624107 1.042403 0.355053 0.081 Uiso 1 1 calc R U . . .
C21_1 C 0.18600(15) 0.91773(11) 0.16192(10) 0.0218(3) Uani 1 1 d . . . . .
C22_1 C 0.08776(16) 0.87594(11) 0.15884(11) 0.0247(4) Uani 1 1 d . . . . .
C23_1 C 0.05883(17) 0.85960(12) 0.09087(12) 0.0287(4) Uani 1 1 d . . . . .
C24_1 C 0.12622(18) 0.88739(13) 0.02466(11) 0.0301(4) Uani 1 1 d . . . . .
H24_1 H 0.107080 0.876168 -0.021475 0.036 Uiso 1 1 calc R U . . .
C25_1 C 0.22064(17) 0.93107(12) 0.02413(11) 0.0270(4) Uani 1 1 d . . . . .
C26_1 C 0.25089(16) 0.94594(11) 0.09294(10) 0.0232(3) Uani 1 1 d . . . . .
C27_1 C 0.01553(18) 0.84436(14) 0.23127(12) 0.0326(4) Uani 1 1 d . . . . .
H01J_1 H -0.078393 0.869498 0.216068 0.049 Uiso 1 1 calc R U . . .
H01K_1 H 0.040785 0.864519 0.272320 0.049 Uiso 1 1 calc R U . . .
H01L_1 H 0.037526 0.778678 0.252226 0.049 Uiso 1 1 calc R U . . .
C28_1 C -0.0401(2) 0.80990(16) 0.08864(14) 0.0402(5) Uani 1 1 d . . . . .
H021_1 H -0.125029 0.842563 0.098428 0.060 Uiso 1 1 calc R U . . .
H022_1 H -0.012563 0.749521 0.129833 0.060 Uiso 1 1 calc R U . . .
H023_1 H -0.046714 0.805412 0.036198 0.060 Uiso 1 1 calc R U . . .
C29_1 C 0.2897(2) 0.96011(14) -0.04960(12) 0.0354(4) Uani 1 1 d . . . . .
H01M_1 H 0.255645 0.943749 -0.090875 0.053 Uiso 1 1 calc R U . . .
H01N_1 H 0.383154 0.930169 -0.036737 0.053 Uiso 1 1 calc R U . . .
H01O_1 H 0.275116 1.025290 -0.069112 0.053 Uiso 1 1 calc R U . . .
C30_1 C 0.35543(17) 0.99215(12) 0.09256(11) 0.0274(4) Uani 1 1 d . . . . .
H00J_1 H 0.331774 1.051227 0.049390 0.041 Uiso 1 1 calc R U . . .
H00K_1 H 0.438570 0.955681 0.084369 0.041 Uiso 1 1 calc R U . . .
H00M_1 H 0.363623 0.999453 0.143688 0.041 Uiso 1 1 calc R U . . .
C1_1 C 0.21067(15) 0.99855(11) 0.26911(10) 0.0217(3) Uani 1 1 d . . . . .
N1_1 N 0.32313(15) 0.82779(10) 0.29346(9) 0.0275(3) Uani 1 1 d D . . . .
K1_2 K 0.53014(4) 0.68702(3) 0.38163(2) 0.03197(11) Uani 1 1 d . . . . .
H1_2 H 0.511(2) 0.5834(18) 0.2449(13) 0.047(7) Uiso 1 1 d D . . . .
C1_2 C 0.75763(17) 0.48996(11) 0.24858(10) 0.0251(4) Uani 1 1 d . . . . .
N2_2 N 0.71794(15) 0.50505(10) 0.17011(9) 0.0288(3) Uani 1 1 d . . . . .
C3_2 C 1.0040(2) 0.44748(16) 0.28988(14) 0.0411(5) Uani 1 1 d . . . . .
H02D_2 H 1.083825 0.397861 0.301738 0.062 Uiso 1 1 calc R U . . .
H02E_2 H 0.989725 0.465779 0.335895 0.062 Uiso 1 1 calc R U . . .
H02F_2 H 1.012461 0.498365 0.243445 0.062 Uiso 1 1 calc R U . . .
C4_2 C 0.8805(2) 0.33758(14) 0.34715(13) 0.0437(5) Uani 1 1 d . . . . .
H02G_2 H 0.959655 0.287890 0.356919 0.066 Uiso 1 1 calc R U . . .
H02H_2 H 0.804593 0.317820 0.339477 0.066 Uiso 1 1 calc R U . . .
H02I_2 H 0.872193 0.356506 0.392947 0.066 Uiso 1 1 calc R U . . .
C5_2 C 0.9060(2) 0.38674(14) 0.20057(12) 0.0353(4) Uani 1 1 d . . . . .
H01Q_2 H 0.998776 0.372715 0.190609 0.042 Uiso 1 1 calc R U . . .
H01R_2 H 0.876259 0.332473 0.210856 0.042 Uiso 1 1 calc R U . . .
C6_2 C 0.8247(2) 0.46418(15) 0.12951(12) 0.0381(5) Uani 1 1 d . . . . .
C7_2 C 0.9069(2) 0.52913(16) 0.08744(14) 0.0489(6) Uani 1 1 d . . . . .
H02M_2 H 0.987016 0.495450 0.073412 0.073 Uiso 1 1 calc R U . . .
H02N_2 H 0.928825 0.556784 0.123477 0.073 Uiso 1 1 calc R U . . .
H02O_2 H 0.856444 0.576029 0.038977 0.073 Uiso 1 1 calc R U . . .
C8_2 C 0.7743(3) 0.4349(2) 0.06850(16) 0.0563(7) Uani 1 1 d . . . . .
H02V_2 H 0.847395 0.408629 0.043688 0.085 Uiso 1 1 calc R U . . .
H02W_2 H 0.714444 0.486909 0.027585 0.085 Uiso 1 1 calc R U . . .
H02X_2 H 0.728292 0.390064 0.094522 0.085 Uiso 1 1 calc R U . . .
C9_2 C 0.58760(18) 0.55158(12) 0.13296(10) 0.0265(4) Uani 1 1 d . . . . .
C10_2 C 0.4924(2) 0.50447(13) 0.14576(11) 0.0324(4) Uani 1 1 d . . . . .
C11_2 C 0.3658(2) 0.55114(15) 0.11210(12) 0.0373(5) Uani 1 1 d . . . . .
H01S_2 H 0.300869 0.520171 0.121649 0.045 Uiso 1 1 calc R U . . .
C12_2 C 0.3314(2) 0.64189(15) 0.06483(12) 0.0362(4) Uani 1 1 d . . . . .
H01P_2 H 0.244364 0.672337 0.041781 0.043 Uiso 1 1 calc R U . . .
C13_2 C 0.42544(19) 0.68735(13) 0.05174(11) 0.0310(4) Uani 1 1 d . . . . .
H13_2 H 0.402706 0.749190 0.018765 0.037 Uiso 1 1 calc R U . . .
C14_2 C 0.55349(18) 0.64371(12) 0.08630(10) 0.0262(4) Uani 1 1 d . . . . .
C15_2 C 0.5241(2) 0.40481(14) 0.19747(13) 0.0407(5) Uani 1 1 d . . . . .
H020_2 H 0.620325 0.381393 0.211969 0.049 Uiso 1 1 calc R U . . .
C16_2 C 0.4583(3) 0.39118(17) 0.27430(14) 0.0495(6) Uani 1 1 d . . . . .
H02J_2 H 0.483103 0.327183 0.307736 0.074 Uiso 1 1 calc R U . . .
H02K_2 H 0.363656 0.412865 0.261518 0.074 Uiso 1 1 calc R U . . .
H02L_2 H 0.485850 0.424736 0.303027 0.074 Uiso 1 1 calc R U . . .
C17_2 C 0.4845(3) 0.35138(17) 0.15221(16) 0.0543(6) Uani 1 1 d . . . . .
H02S_2 H 0.516626 0.287044 0.183965 0.081 Uiso 1 1 calc R U . . .
H02T_2 H 0.522133 0.364402 0.101141 0.081 Uiso 1 1 calc R U . . .
H02U_2 H 0.389465 0.368547 0.142610 0.081 Uiso 1 1 calc R U . . .
C18_2 C 0.64866(18) 0.69939(12) 0.07677(11) 0.0295(4) Uani 1 1 d . . . . .
H18_2 H 0.734441 0.658272 0.105490 0.035 Uiso 1 1 calc R U . . .
C19_2 C 0.60302(19) 0.76990(13) 0.11443(13) 0.0340(4) Uani 1 1 d . . . . .
H01G_2 H 0.664946 0.805639 0.107076 0.051 Uiso 1 1 calc R U . . .
H01H_2 H 0.597873 0.739966 0.171487 0.051 Uiso 1 1 calc R U . . .
H01I_2 H 0.516980 0.809294 0.088887 0.051 Uiso 1 1 calc R U . . .
C20_2 C 0.6687(2) 0.74444(15) -0.01088(13) 0.0411(5) Uani 1 1 d . . . . .
H024_2 H 0.735761 0.775609 -0.014436 0.062 Uiso 1 1 calc R U . . .
H025_2 H 0.586833 0.787778 -0.039623 0.062 Uiso 1 1 calc R U . . .
H026_2 H 0.696196 0.698736 -0.034636 0.062 Uiso 1 1 calc R U . . .
C22_2 C 0.82137(16) 0.59770(11) 0.37712(11) 0.0248(4) Uani 1 1 d . . . . .
C21_2 C 0.75016(15) 0.53549(11) 0.38214(10) 0.0218(3) Uani 1 1 d . . . . .
C23_2 C 0.85629(16) 0.61211(13) 0.44523(12) 0.0290(4) Uani 1 1 d . . . . .
C24_2 C 0.82285(17) 0.56266(14) 0.51823(12) 0.0318(4) Uani 1 1 d . . . . .
H24_2 H 0.845223 0.573076 0.564225 0.038 Uiso 1 1 calc R U . . .
C25_2 C 0.75727(16) 0.49795(13) 0.52641(11) 0.0278(4) Uani 1 1 d . . . . .
C26_2 C 0.71962(15) 0.48537(11) 0.45784(10) 0.0229(3) Uani 1 1 d . . . . .
C2_2 C 0.88817(18) 0.41686(12) 0.27198(11) 0.0294(4) Uani 1 1 d . . . . .
N1_2 N 0.54893(14) 0.58904(10) 0.28622(9) 0.0259(3) Uani 1 1 d D . . . .
B1_2 B 0.67944(19) 0.53781(12) 0.30156(12) 0.0219(4) Uani 1 1 d . . . . .
 
loop_
 _atom_site_aniso_label
 _atom_site_aniso_U_11
 _atom_site_aniso_U_22
 _atom_site_aniso_U_33
 _atom_site_aniso_U_23
 _atom_site_aniso_U_13
 _atom_site_aniso_U_12
C00Q 0.0294(9) 0.0229(8) 0.0265(9) -0.0069(7) 0.0072(7) -0.0056(7)
C00R 0.0327(9) 0.0284(9) 0.0374(11) -0.0101(8) 0.0054(8) -0.0126(8)
C01D 0.0260(9) 0.0400(11) 0.0568(14) -0.0279(10) -0.0004(9) -0.0099(8)
C01F 0.0318(10) 0.0510(12) 0.0238(10) -0.0121(9) 0.0037(8) -0.0046(9)
B1_1 0.0214(9) 0.0257(9) 0.0224(9) -0.0088(8) 0.0064(7) -0.0101(7)
K1_1 0.0310(2) 0.0369(2) 0.0354(2) -0.01959(18) -0.00421(16) -0.00110(16)
C2_1 0.0239(8) 0.0231(8) 0.0244(9) -0.0049(7) 0.0066(7) -0.0034(7)
N2_1 0.0226(7) 0.0178(7) 0.0254(7) -0.0073(6) 0.0055(6) -0.0073(5)
C3_1 0.0217(9) 0.0395(11) 0.0433(12) -0.0146(9) 0.0040(8) -0.0029(8)
C4_1 0.0441(11) 0.0271(9) 0.0259(10) -0.0013(8) 0.0069(8) 0.0004(8)
C5_1 0.0313(9) 0.0194(8) 0.0313(10) -0.0061(7) 0.0102(7) -0.0045(7)
C6_1 0.0337(9) 0.0186(8) 0.0370(10) -0.0112(7) 0.0096(8) -0.0103(7)
C7_1 0.0470(11) 0.0283(10) 0.0459(12) -0.0202(9) 0.0048(9) -0.0117(9)
C8_1 0.0440(11) 0.0272(10) 0.0638(15) -0.0132(10) 0.0166(11) -0.0201(9)
C9_1 0.0237(8) 0.0226(8) 0.0219(8) -0.0111(7) 0.0036(6) -0.0085(6)
C10_1 0.0254(8) 0.0223(8) 0.0229(8) -0.0112(7) 0.0051(6) -0.0083(6)
C11_1 0.0327(9) 0.0272(9) 0.0221(9) -0.0090(7) 0.0056(7) -0.0070(7)
C12_1 0.0298(9) 0.0337(10) 0.0263(9) -0.0105(8) -0.0021(7) -0.0021(8)
C13_1 0.0220(8) 0.0415(11) 0.0310(10) -0.0175(8) 0.0019(7) -0.0063(7)
C14_1 0.0229(8) 0.0317(9) 0.0271(9) -0.0147(8) 0.0048(7) -0.0097(7)
C15_1 0.0261(8) 0.0236(8) 0.0252(9) -0.0067(7) 0.0100(7) -0.0073(7)
C16_1 0.0311(9) 0.0304(9) 0.0324(10) -0.0070(8) 0.0094(8) -0.0150(8)
C17_1 0.0367(10) 0.0338(10) 0.0303(10) -0.0123(8) 0.0148(8) -0.0078(8)
C18_1 0.0217(8) 0.0420(11) 0.0352(11) -0.0114(9) 0.0092(7) -0.0128(8)
C19_1 0.0322(10) 0.0537(13) 0.0327(11) -0.0133(10) 0.0131(8) -0.0040(9)
C20_1 0.0358(11) 0.0661(16) 0.0630(16) -0.0156(13) 0.0088(11) -0.0312(11)
C21_1 0.0195(7) 0.0196(8) 0.0229(8) -0.0045(7) 0.0023(6) -0.0046(6)
C22_1 0.0200(8) 0.0234(8) 0.0254(9) -0.0032(7) 0.0010(7) -0.0057(6)
C23_1 0.0226(8) 0.0283(9) 0.0313(10) -0.0070(8) -0.0040(7) -0.0065(7)
C24_1 0.0308(9) 0.0321(9) 0.0251(9) -0.0095(8) -0.0036(7) -0.0064(7)
C25_1 0.0297(9) 0.0230(8) 0.0229(9) -0.0044(7) 0.0023(7) -0.0041(7)
C26_1 0.0221(8) 0.0191(8) 0.0247(9) -0.0049(7) 0.0033(6) -0.0043(6)
C27_1 0.0285(9) 0.0371(10) 0.0332(10) -0.0082(8) 0.0071(8) -0.0172(8)
C28_1 0.0327(10) 0.0479(12) 0.0442(12) -0.0176(10) -0.0023(9) -0.0171(9)
C29_1 0.0450(11) 0.0354(10) 0.0243(10) -0.0084(8) 0.0091(8) -0.0123(9)
C30_1 0.0302(9) 0.0247(9) 0.0297(9) -0.0094(7) 0.0108(7) -0.0122(7)
C1_1 0.0209(8) 0.0215(8) 0.0211(8) -0.0048(7) 0.0055(6) -0.0076(6)
N1_1 0.0314(8) 0.0257(8) 0.0243(8) -0.0115(6) -0.0011(6) -0.0032(6)
K1_2 0.0325(2) 0.0300(2) 0.0281(2) -0.01154(16) 0.00059(15) 0.00107(16)
C1_2 0.0322(9) 0.0211(8) 0.0213(9) -0.0068(7) 0.0040(7) -0.0079(7)
N2_2 0.0371(8) 0.0255(8) 0.0214(8) -0.0095(6) 0.0020(6) -0.0037(6)
C3_2 0.0311(10) 0.0523(13) 0.0419(12) -0.0248(10) 0.0010(9) -0.0044(9)
C4_2 0.0521(13) 0.0301(10) 0.0352(11) -0.0065(9) 0.0114(9) 0.0031(9)
C5_2 0.0375(10) 0.0340(10) 0.0347(11) -0.0177(9) 0.0085(8) -0.0034(8)
C6_2 0.0445(11) 0.0398(11) 0.0281(10) -0.0170(9) 0.0075(8) -0.0025(9)
C7_2 0.0511(13) 0.0470(13) 0.0374(12) -0.0088(10) 0.0189(10) -0.0048(10)
C8_2 0.0564(14) 0.0709(17) 0.0466(14) -0.0374(13) 0.0036(11) -0.0036(12)
C9_2 0.0382(10) 0.0255(9) 0.0193(8) -0.0100(7) 0.0028(7) -0.0120(7)
C10_2 0.0499(11) 0.0320(10) 0.0220(9) -0.0109(8) 0.0032(8) -0.0208(9)
C11_2 0.0470(11) 0.0453(12) 0.0319(10) -0.0176(9) 0.0071(9) -0.0282(10)
C12_2 0.0350(10) 0.0448(12) 0.0333(11) -0.0186(9) -0.0017(8) -0.0126(9)
C13_2 0.0388(10) 0.0287(9) 0.0250(9) -0.0090(8) 0.0001(8) -0.0100(8)
C14_2 0.0352(9) 0.0261(9) 0.0199(8) -0.0096(7) 0.0041(7) -0.0116(7)
C15_2 0.0618(13) 0.0313(10) 0.0334(11) -0.0081(9) 0.0017(10) -0.0254(10)
C16_2 0.0727(16) 0.0474(13) 0.0334(12) -0.0074(10) 0.0062(11) -0.0353(12)
C17_2 0.0860(18) 0.0407(13) 0.0470(14) -0.0172(11) 0.0072(13) -0.0342(13)
C18_2 0.0333(9) 0.0277(9) 0.0278(10) -0.0079(8) 0.0058(7) -0.0123(7)
C19_2 0.0367(10) 0.0303(10) 0.0401(11) -0.0133(8) 0.0053(8) -0.0169(8)
C20_2 0.0512(12) 0.0373(11) 0.0341(11) -0.0067(9) 0.0120(9) -0.0202(10)
C22_2 0.0211(8) 0.0224(8) 0.0302(9) -0.0106(7) 0.0024(7) -0.0035(6)
C21_2 0.0209(8) 0.0200(8) 0.0236(9) -0.0098(7) 0.0025(6) -0.0021(6)
C23_2 0.0191(8) 0.0304(9) 0.0397(11) -0.0188(8) -0.0010(7) -0.0025(7)
C24_2 0.0231(8) 0.0437(11) 0.0315(10) -0.0228(9) -0.0021(7) -0.0014(8)
C25_2 0.0216(8) 0.0332(9) 0.0238(9) -0.0114(7) 0.0017(7) 0.0015(7)
C26_2 0.0204(8) 0.0212(8) 0.0240(9) -0.0085(7) 0.0033(6) -0.0005(6)
C2_2 0.0331(9) 0.0267(9) 0.0263(9) -0.0107(8) 0.0055(7) -0.0036(7)
N1_2 0.0278(7) 0.0279(8) 0.0241(8) -0.0131(6) 0.0016(6) -0.0064(6)
B1_2 0.0287(9) 0.0179(8) 0.0205(9) -0.0058(7) 0.0042(7) -0.0106(7)
 
_geom_special_details
;
 All esds (except the esd in the dihedral angle between two l.s. planes)
 are estimated using the full covariance matrix.  The cell esds are taken
 into account individually in the estimation of esds in distances, angles
 and torsion angles; correlations between esds in cell parameters are only
 used when they are defined by crystal symmetry.  An approximate (isotropic)
 treatment of cell esds is used for estimating esds involving l.s. planes.
;
 
loop_
 _geom_bond_atom_site_label_1
 _geom_bond_atom_site_label_2
 _geom_bond_distance
 _geom_bond_site_symmetry_2
 _geom_bond_publ_flag
C00Q C26_2 1.511(2) . ?
C00Q K1_2 3.5109(18) 2_666 ?
C00Q H00A 0.9800 . ?
C00Q H00C 0.9800 . ?
C00Q H00D 0.9800 . ?
C00R C22_2 1.514(3) . ?
C00R H00E 0.9800 . ?
C00R H00F 0.9800 . ?
C00R H00G 0.9800 . ?
C01D C23_2 1.513(3) . ?
C01D H01T 0.9800 . ?
C01D H01U 0.9800 . ?
C01D H01V 0.9800 . ?
C01F C25_2 1.512(3) . ?
C01F H01Z 0.9800 . ?
C01F H010 0.9800 . ?
C01F H011 0.9800 . ?
B1_1 N1_1 1.398(2) . ?
B1_1 C1_1 1.561(3) . ?
B1_1 C21_1 1.629(3) . ?
B1_1 K1_1 3.345(2) . ?
K1_1 N1_1 2.6733(16) . ?
K1_1 N1_2 2.7397(16) . ?
K1_1 C21_1 2.9738(17) . ?
K1_1 C22_1 2.9815(17) . ?
K1_1 C13_2 3.185(2) . ?
K1_1 C12_2 3.324(2) . ?
K1_1 C23_1 3.3494(18) . ?
K1_1 C26_1 3.3717(17) . ?
K1_1 C19_2 3.455(2) . ?
K1_1 K1_2 3.5702(6) . ?
K1_1 H1_2 2.48(3) . ?
C2_1 C1_1 1.531(2) . ?
C2_1 C4_1 1.536(3) . ?
C2_1 C5_1 1.538(3) . ?
C2_1 C3_1 1.542(3) . ?
N2_1 C1_1 1.403(2) . ?
N2_1 C9_1 1.430(2) . ?
N2_1 C6_1 1.494(2) . ?
C3_1 H014_1 0.9800 . ?
C3_1 H015_1 0.9800 . ?
C3_1 H016_1 0.9800 . ?
C4_1 H017_1 0.9800 . ?
C4_1 H018_1 0.9800 . ?
C4_1 H019_1 0.9800 . ?
C5_1 C6_1 1.533(3) . ?
C5_1 H00H_1 0.9900 . ?
C5_1 H00I_1 0.9900 . ?
C6_1 C7_1 1.520(3) . ?
C6_1 C8_1 1.541(3) . ?
C7_1 H01W_1 0.9800 . ?
C7_1 H01X_1 0.9800 . ?
C7_1 H01Y_1 0.9800 . ?
C8_1 H02A_1 0.9800 . ?
C8_1 H02B_1 0.9800 . ?
C8_1 H02C_1 0.9800 . ?
C9_1 C10_1 1.410(2) . ?
C9_1 C14_1 1.411(2) . ?
C10_1 C11_1 1.399(3) . ?
C10_1 C15_1 1.524(2) . ?
C11_1 C12_1 1.388(3) . ?
C11_1 H11_1 0.9500 . ?
C12_1 C13_1 1.381(3) . ?
C12_1 K1_2 3.342(2) . ?
C12_1 H12_1 0.9500 . ?
C13_1 C14_1 1.393(3) . ?
C13_1 K1_2 3.318(2) . ?
C13_1 H13_1 0.9500 . ?
C14_1 C18_1 1.521(3) . ?
C15_1 C16_1 1.529(3) . ?
C15_1 C17_1 1.530(3) . ?
C15_1 H15_1 1.0000 . ?
C16_1 H01A_1 0.9800 . ?
C16_1 H01B_1 0.9800 . ?
C16_1 H01C_1 0.9800 . ?
C17_1 H01D_1 0.9800 . ?
C17_1 H01E_1 0.9800 . ?
C17_1 H01F_1 0.9800 . ?
C18_1 C20_1 1.530(3) . ?
C18_1 C19_1 1.533(3) . ?
C18_1 H18_1 1.0000 . ?
C19_1 H027_1 0.9800 . ?
C19_1 H028_1 0.9800 . ?
C19_1 H029_1 0.9800 . ?
C20_1 H02P_1 0.9800 . ?
C20_1 H02Q_1 0.9800 . ?
C20_1 H02R_1 0.9800 . ?
C21_1 C26_1 1.415(2) . ?
C21_1 C22_1 1.416(2) . ?
C22_1 C23_1 1.400(3) . ?
C22_1 C27_1 1.517(2) . ?
C23_1 C24_1 1.392(3) . ?
C23_1 C28_1 1.513(3) . ?
C24_1 C25_1 1.389(3) . ?
C24_1 H24_1 0.9500 . ?
C25_1 C26_1 1.405(3) . ?
C25_1 C29_1 1.508(3) . ?
C26_1 C30_1 1.514(2) . ?
C27_1 H01J_1 0.9800 . ?
C27_1 H01K_1 0.9800 . ?
C27_1 H01L_1 0.9800 . ?
C28_1 H021_1 0.9800 . ?
C28_1 H022_1 0.9800 . ?
C28_1 H023_1 0.9800 . ?
C29_1 H01M_1 0.9800 . ?
C29_1 H01N_1 0.9800 . ?
C29_1 H01O_1 0.9800 . ?
C30_1 H00J_1 0.9800 . ?
C30_1 H00K_1 0.9800 . ?
C30_1 H00M_1 0.9800 . ?
N1_1 K1_2 2.7495(16) . ?
N1_1 H1_1 0.891(16) . ?
K1_2 N1_2 2.7348(16) . ?
K1_2 C21_2 2.9577(16) . ?
K1_2 C22_2 3.0954(17) . ?
K1_2 C26_2 3.2231(16) . ?
K1_2 B1_2 3.352(2) . ?
K1_2 C23_2 3.4332(17) . ?
K1_2 H1_1 2.53(2) . ?
C1_2 N2_2 1.395(2) . ?
C1_2 C2_2 1.534(2) . ?
C1_2 B1_2 1.560(3) . ?
N2_2 C9_2 1.437(2) . ?
N2_2 C6_2 1.498(2) . ?
C3_2 C2_2 1.534(3) . ?
C3_2 H02D_2 0.9800 . ?
C3_2 H02E_2 0.9800 . ?
C3_2 H02F_2 0.9800 . ?
C4_2 C2_2 1.538(3) . ?
C4_2 H02G_2 0.9800 . ?
C4_2 H02H_2 0.9800 . ?
C4_2 H02I_2 0.9800 . ?
C5_2 C6_2 1.517(3) . ?
C5_2 C2_2 1.535(3) . ?
C5_2 H01Q_2 0.9900 . ?
C5_2 H01R_2 0.9900 . ?
C6_2 C8_2 1.505(3) . ?
C6_2 C7_2 1.558(3) . ?
C7_2 H02M_2 0.9800 . ?
C7_2 H02N_2 0.9800 . ?
C7_2 H02O_2 0.9800 . ?
C8_2 H02V_2 0.9800 . ?
C8_2 H02W_2 0.9800 . ?
C8_2 H02X_2 0.9800 . ?
C9_2 C14_2 1.405(3) . ?
C9_2 C10_2 1.412(3) . ?
C10_2 C11_2 1.388(3) . ?
C10_2 C15_2 1.527(3) . ?
C11_2 C12_2 1.389(3) . ?
C11_2 H01S_2 0.9500 . ?
C12_2 C13_2 1.383(3) . ?
C12_2 H01P_2 0.9500 . ?
C13_2 C14_2 1.398(3) . ?
C13_2 H13_2 0.9500 . ?
C14_2 C18_2 1.518(2) . ?
C15_2 C16_2 1.525(3) . ?
C15_2 C17_2 1.534(3) . ?
C15_2 H020_2 1.0000 . ?
C16_2 H02J_2 0.9800 . ?
C16_2 H02K_2 0.9800 . ?
C16_2 H02L_2 0.9800 . ?
C17_2 H02S_2 0.9800 . ?
C17_2 H02T_2 0.9800 . ?
C17_2 H02U_2 0.9800 . ?
C18_2 C19_2 1.529(3) . ?
C18_2 C20_2 1.532(3) . ?
C18_2 H18_2 1.0000 . ?
C19_2 H01G_2 0.9800 . ?
C19_2 H01H_2 0.9800 . ?
C19_2 H01I_2 0.9800 . ?
C20_2 H024_2 0.9800 . ?
C20_2 H025_2 0.9800 . ?
C20_2 H026_2 0.9800 . ?
C22_2 C23_2 1.403(3) . ?
C22_2 C21_2 1.416(2) . ?
C21_2 C26_2 1.413(2) . ?
C21_2 B1_2 1.626(3) . ?
C23_2 C24_2 1.386(3) . ?
C24_2 C25_2 1.398(3) . ?
C24_2 H24_2 0.9500 . ?
C25_2 C26_2 1.404(3) . ?
N1_2 B1_2 1.401(2) . ?
N1_2 H1_2 0.898(17) . ?
 
loop_
 _geom_angle_atom_site_label_1
 _geom_angle_atom_site_label_2
 _geom_angle_atom_site_label_3
 _geom_angle
 _geom_angle_site_symmetry_1
 _geom_angle_site_symmetry_3
 _geom_angle_publ_flag
C26_2 C00Q K1_2 132.77(12) . 2_666 ?
C26_2 C00Q H00A 109.5 . . ?
K1_2 C00Q H00A 63.2 2_666 . ?
C26_2 C00Q H00C 109.5 . . ?
K1_2 C00Q H00C 116.9 2_666 . ?
H00A C00Q H00C 109.5 . . ?
C26_2 C00Q H00D 109.5 . . ?
K1_2 C00Q H00D 47.0 2_666 . ?
H00A C00Q H00D 109.5 . . ?
H00C C00Q H00D 109.5 . . ?
C22_2 C00R H00E 109.5 . . ?
C22_2 C00R H00F 109.5 . . ?
H00E C00R H00F 109.5 . . ?
C22_2 C00R H00G 109.5 . . ?
H00E C00R H00G 109.5 . . ?
H00F C00R H00G 109.5 . . ?
C23_2 C01D H01T 109.5 . . ?
C23_2 C01D H01U 109.5 . . ?
H01T C01D H01U 109.5 . . ?
C23_2 C01D H01V 109.5 . . ?
H01T C01D H01V 109.5 . . ?
H01U C01D H01V 109.5 . . ?
C25_2 C01F H01Z 109.5 . . ?
C25_2 C01F H010 109.5 . . ?
H01Z C01F H010 109.5 . . ?
C25_2 C01F H011 109.5 . . ?
H01Z C01F H011 109.5 . . ?
H010 C01F H011 109.5 . . ?
N1_1 B1_1 C1_1 126.86(17) . . ?
N1_1 B1_1 C21_1 112.79(15) . . ?
C1_1 B1_1 C21_1 120.34(15) . . ?
N1_1 B1_1 K1_1 50.11(9) . . ?
C1_1 B1_1 K1_1 176.48(12) . . ?
C21_1 B1_1 K1_1 62.69(8) . . ?
N1_1 K1_1 N1_2 98.86(5) . . ?
N1_1 K1_1 C21_1 52.77(5) . . ?
N1_2 K1_1 C21_1 147.62(5) . . ?
N1_1 K1_1 C22_1 69.67(5) . . ?
N1_2 K1_1 C22_1 166.32(5) . . ?
C21_1 K1_1 C22_1 27.51(5) . . ?
N1_1 K1_1 C13_2 146.90(5) . . ?
N1_2 K1_1 C13_2 85.61(5) . . ?
C21_1 K1_1 C13_2 109.76(5) . . ?
C22_1 K1_1 C13_2 108.07(5) . . ?
N1_1 K1_1 C12_2 167.10(5) . . ?
N1_2 K1_1 C12_2 90.35(5) . . ?
C21_1 K1_1 C12_2 115.61(5) . . ?
C22_1 K1_1 C12_2 102.22(5) . . ?
C13_2 K1_1 C12_2 24.41(5) . . ?
N1_1 K1_1 B1_1 23.65(5) . . ?
N1_2 K1_1 B1_1 121.19(5) . . ?
C21_1 K1_1 B1_1 29.13(5) . . ?
C22_1 K1_1 B1_1 48.94(5) . . ?
C13_2 K1_1 B1_1 132.81(5) . . ?
C12_2 K1_1 B1_1 144.39(5) . . ?
N1_1 K1_1 C23_1 93.89(5) . . ?
N1_2 K1_1 C23_1 166.94(5) . . ?
C21_1 K1_1 C23_1 45.18(5) . . ?
C22_1 K1_1 C23_1 24.68(5) . . ?
C13_2 K1_1 C23_1 85.26(5) . . ?
C12_2 K1_1 C23_1 77.54(5) . . ?
B1_1 K1_1 C23_1 71.84(5) . . ?
N1_1 K1_1 C26_1 67.84(5) . . ?
N1_2 K1_1 C26_1 139.34(5) . . ?
C21_1 K1_1 C26_1 24.77(4) . . ?
C22_1 K1_1 C26_1 44.38(4) . . ?
C13_2 K1_1 C26_1 87.39(5) . . ?
C12_2 K1_1 C26_1 99.31(5) . . ?
B1_1 K1_1 C26_1 46.37(5) . . ?
C23_1 K1_1 C26_1 49.37(4) . . ?
N1_1 K1_1 C19_2 95.90(5) . . ?
N1_2 K1_1 C19_2 70.89(5) . . ?
C21_1 K1_1 C19_2 94.53(5) . . ?
C22_1 K1_1 C19_2 116.58(5) . . ?
C13_2 K1_1 C19_2 54.41(5) . . ?
C12_2 K1_1 C19_2 78.53(5) . . ?
B1_1 K1_1 C19_2 95.56(5) . . ?
C23_1 K1_1 C19_2 110.75(5) . . ?
C26_1 K1_1 C19_2 72.54(4) . . ?
N1_1 K1_1 K1_2 49.75(3) . . ?
N1_2 K1_1 K1_2 49.24(3) . . ?
C21_1 K1_1 K1_2 101.55(4) . . ?
C22_1 K1_1 K1_2 118.48(4) . . ?
C13_2 K1_1 K1_2 127.54(4) . . ?
C12_2 K1_1 K1_2 139.31(4) . . ?
B1_1 K1_1 K1_2 72.83(4) . . ?
C23_1 K1_1 K1_2 143.14(4) . . ?
C26_1 K1_1 K1_2 109.06(3) . . ?
C19_2 K1_1 K1_2 82.78(4) . . ?
N1_1 K1_1 H1_2 117.9(4) . . ?
N1_2 K1_1 H1_2 19.0(4) . . ?
C21_1 K1_1 H1_2 162.8(5) . . ?
C22_1 K1_1 H1_2 169.6(5) . . ?
C13_2 K1_1 H1_2 69.9(5) . . ?
C12_2 K1_1 H1_2 71.6(4) . . ?
B1_1 K1_1 H1_2 139.9(4) . . ?
C23_1 K1_1 H1_2 148.1(4) . . ?
C26_1 K1_1 H1_2 143.5(6) . . ?
C19_2 K1_1 H1_2 71.1(6) . . ?
K1_2 K1_1 H1_2 68.2(4) . . ?
C1_1 C2_1 C4_1 113.49(14) . . ?
C1_1 C2_1 C5_1 103.80(14) . . ?
C4_1 C2_1 C5_1 111.48(15) . . ?
C1_1 C2_1 C3_1 111.51(15) . . ?
C4_1 C2_1 C3_1 107.06(16) . . ?
C5_1 C2_1 C3_1 109.51(15) . . ?
C1_1 N2_1 C9_1 123.52(14) . . ?
C1_1 N2_1 C6_1 113.56(14) . . ?
C9_1 N2_1 C6_1 122.60(14) . . ?
C2_1 C3_1 H014_1 109.5 . . ?
C2_1 C3_1 H015_1 109.5 . . ?
H014_1 C3_1 H015_1 109.5 . . ?
C2_1 C3_1 H016_1 109.5 . . ?
H014_1 C3_1 H016_1 109.5 . . ?
H015_1 C3_1 H016_1 109.5 . . ?
C2_1 C4_1 H017_1 109.5 . . ?
C2_1 C4_1 H018_1 109.5 . . ?
H017_1 C4_1 H018_1 109.5 . . ?
C2_1 C4_1 H019_1 109.5 . . ?
H017_1 C4_1 H019_1 109.5 . . ?
H018_1 C4_1 H019_1 109.5 . . ?
C6_1 C5_1 C2_1 107.16(14) . . ?
C6_1 C5_1 H00H_1 110.3 . . ?
C2_1 C5_1 H00H_1 110.3 . . ?
C6_1 C5_1 H00I_1 110.3 . . ?
C2_1 C5_1 H00I_1 110.3 . . ?
H00H_1 C5_1 H00I_1 108.5 . . ?
N2_1 C6_1 C7_1 112.70(15) . . ?
N2_1 C6_1 C5_1 100.39(14) . . ?
C7_1 C6_1 C5_1 112.71(16) . . ?
N2_1 C6_1 C8_1 111.88(15) . . ?
C7_1 C6_1 C8_1 108.08(17) . . ?
C5_1 C6_1 C8_1 111.03(17) . . ?
C6_1 C7_1 H01W_1 109.5 . . ?
C6_1 C7_1 H01X_1 109.5 . . ?
H01W_1 C7_1 H01X_1 109.5 . . ?
C6_1 C7_1 H01Y_1 109.5 . . ?
H01W_1 C7_1 H01Y_1 109.5 . . ?
H01X_1 C7_1 H01Y_1 109.5 . . ?
C6_1 C8_1 H02A_1 109.5 . . ?
C6_1 C8_1 H02B_1 109.5 . . ?
H02A_1 C8_1 H02B_1 109.5 . . ?
C6_1 C8_1 H02C_1 109.5 . . ?
H02A_1 C8_1 H02C_1 109.5 . . ?
H02B_1 C8_1 H02C_1 109.5 . . ?
C10_1 C9_1 C14_1 120.06(16) . . ?
C10_1 C9_1 N2_1 119.02(14) . . ?
C14_1 C9_1 N2_1 120.86(15) . . ?
C11_1 C10_1 C9_1 118.92(15) . . ?
C11_1 C10_1 C15_1 118.95(15) . . ?
C9_1 C10_1 C15_1 122.07(15) . . ?
C12_1 C11_1 C10_1 121.10(17) . . ?
C12_1 C11_1 H11_1 119.4 . . ?
C10_1 C11_1 H11_1 119.4 . . ?
C13_1 C12_1 C11_1 119.42(17) . . ?
C13_1 C12_1 K1_2 77.03(11) . . ?
C11_1 C12_1 K1_2 96.24(12) . . ?
C13_1 C12_1 H12_1 120.3 . . ?
C11_1 C12_1 H12_1 120.3 . . ?
K1_2 C12_1 H12_1 96.6 . . ?
C12_1 C13_1 C14_1 121.65(17) . . ?
C12_1 C13_1 K1_2 79.04(12) . . ?
C14_1 C13_1 K1_2 94.91(12) . . ?
C12_1 C13_1 H13_1 119.2 . . ?
C14_1 C13_1 H13_1 119.2 . . ?
K1_2 C13_1 H13_1 96.2 . . ?
C13_1 C14_1 C9_1 118.81(16) . . ?
C13_1 C14_1 C18_1 119.03(16) . . ?
C9_1 C14_1 C18_1 122.04(16) . . ?
C10_1 C15_1 C16_1 111.35(14) . . ?
C10_1 C15_1 C17_1 111.79(15) . . ?
C16_1 C15_1 C17_1 110.29(15) . . ?
C10_1 C15_1 H15_1 107.7 . . ?
C16_1 C15_1 H15_1 107.7 . . ?
C17_1 C15_1 H15_1 107.7 . . ?
C15_1 C16_1 H01A_1 109.5 . . ?
C15_1 C16_1 H01B_1 109.5 . . ?
H01A_1 C16_1 H01B_1 109.5 . . ?
C15_1 C16_1 H01C_1 109.5 . . ?
H01A_1 C16_1 H01C_1 109.5 . . ?
H01B_1 C16_1 H01C_1 109.5 . . ?
C15_1 C17_1 H01D_1 109.5 . . ?
C15_1 C17_1 H01E_1 109.5 . . ?
H01D_1 C17_1 H01E_1 109.5 . . ?
C15_1 C17_1 H01F_1 109.5 . . ?
H01D_1 C17_1 H01F_1 109.5 . . ?
H01E_1 C17_1 H01F_1 109.5 . . ?
C14_1 C18_1 C20_1 111.59(18) . . ?
C14_1 C18_1 C19_1 110.23(17) . . ?
C20_1 C18_1 C19_1 110.58(18) . . ?
C14_1 C18_1 H18_1 108.1 . . ?
C20_1 C18_1 H18_1 108.1 . . ?
C19_1 C18_1 H18_1 108.1 . . ?
C18_1 C19_1 H027_1 109.5 . . ?
C18_1 C19_1 H028_1 109.5 . . ?
H027_1 C19_1 H028_1 109.5 . . ?
C18_1 C19_1 H029_1 109.5 . . ?
H027_1 C19_1 H029_1 109.5 . . ?
H028_1 C19_1 H029_1 109.5 . . ?
C18_1 C20_1 H02P_1 109.5 . . ?
C18_1 C20_1 H02Q_1 109.5 . . ?
H02P_1 C20_1 H02Q_1 109.5 . . ?
C18_1 C20_1 H02R_1 109.5 . . ?
H02P_1 C20_1 H02R_1 109.5 . . ?
H02Q_1 C20_1 H02R_1 109.5 . . ?
C26_1 C21_1 C22_1 118.00(16) . . ?
C26_1 C21_1 B1_1 120.45(14) . . ?
C22_1 C21_1 B1_1 120.17(15) . . ?
C26_1 C21_1 K1_1 93.56(10) . . ?
C22_1 C21_1 K1_1 76.55(10) . . ?
B1_1 C21_1 K1_1 88.18(9) . . ?
C23_1 C22_1 C21_1 121.24(16) . . ?
C23_1 C22_1 C27_1 118.71(16) . . ?
C21_1 C22_1 C27_1 120.00(16) . . ?
C23_1 C22_1 K1_1 92.53(11) . . ?
C21_1 C22_1 K1_1 75.94(9) . . ?
C27_1 C22_1 K1_1 99.56(11) . . ?
C24_1 C23_1 C22_1 118.86(16) . . ?
C24_1 C23_1 C28_1 119.37(18) . . ?
C22_1 C23_1 C28_1 121.74(17) . . ?
C24_1 C23_1 K1_1 92.44(11) . . ?
C22_1 C23_1 K1_1 62.79(9) . . ?
C28_1 C23_1 K1_1 112.70(12) . . ?
C25_1 C24_1 C23_1 121.88(18) . . ?
C25_1 C24_1 H24_1 119.1 . . ?
C23_1 C24_1 H24_1 119.1 . . ?
C24_1 C25_1 C26_1 119.04(17) . . ?
C24_1 C25_1 C29_1 119.42(17) . . ?
C26_1 C25_1 C29_1 121.53(17) . . ?
C25_1 C26_1 C21_1 120.93(16) . . ?
C25_1 C26_1 C30_1 118.86(15) . . ?
C21_1 C26_1 C30_1 120.21(16) . . ?
C25_1 C26_1 K1_1 92.96(10) . . ?
C21_1 C26_1 K1_1 61.68(9) . . ?
C30_1 C26_1 K1_1 115.17(11) . . ?
C22_1 C27_1 H01J_1 109.5 . . ?
C22_1 C27_1 H01K_1 109.5 . . ?
H01J_1 C27_1 H01K_1 109.5 . . ?
C22_1 C27_1 H01L_1 109.5 . . ?
H01J_1 C27_1 H01L_1 109.5 . . ?
H01K_1 C27_1 H01L_1 109.5 . . ?
C23_1 C28_1 H021_1 109.5 . . ?
C23_1 C28_1 H022_1 109.5 . . ?
H021_1 C28_1 H022_1 109.5 . . ?
C23_1 C28_1 H023_1 109.5 . . ?
H021_1 C28_1 H023_1 109.5 . . ?
H022_1 C28_1 H023_1 109.5 . . ?
C25_1 C29_1 H01M_1 109.5 . . ?
C25_1 C29_1 H01N_1 109.5 . . ?
H01M_1 C29_1 H01N_1 109.5 . . ?
C25_1 C29_1 H01O_1 109.5 . . ?
H01M_1 C29_1 H01O_1 109.5 . . ?
H01N_1 C29_1 H01O_1 109.5 . . ?
C26_1 C30_1 H00J_1 109.5 . . ?
C26_1 C30_1 H00K_1 109.5 . . ?
H00J_1 C30_1 H00K_1 109.5 . . ?
C26_1 C30_1 H00M_1 109.5 . . ?
H00J_1 C30_1 H00M_1 109.5 . . ?
H00K_1 C30_1 H00M_1 109.5 . . ?
N2_1 C1_1 C2_1 107.23(14) . . ?
N2_1 C1_1 B1_1 124.83(14) . . ?
C2_1 C1_1 B1_1 127.94(15) . . ?
B1_1 N1_1 K1_1 106.24(12) . . ?
B1_1 N1_1 K1_2 163.64(12) . . ?
K1_1 N1_1 K1_2 82.34(4) . . ?
B1_1 N1_1 H1_1 107.5(15) . . ?
K1_1 N1_1 H1_1 145.8(15) . . ?
K1_2 N1_1 H1_1 66.3(15) . . ?
N1_2 K1_2 N1_1 97.14(5) . . ?
N1_2 K1_2 C21_2 52.39(5) . . ?
N1_1 K1_2 C21_2 146.51(5) . . ?
N1_2 K1_2 C22_2 71.36(5) . . ?
N1_1 K1_2 C22_2 142.05(5) . . ?
C21_2 K1_2 C22_2 26.94(5) . . ?
N1_2 K1_2 C26_2 65.26(5) . . ?
N1_1 K1_2 C26_2 159.37(5) . . ?
C21_2 K1_2 C26_2 25.98(4) . . ?
C22_2 K1_2 C26_2 45.22(4) . . ?
N1_2 K1_2 C13_1 156.27(5) . . ?
N1_1 K1_2 C13_1 82.32(5) . . ?
C21_2 K1_2 C13_1 119.33(5) . . ?
C22_2 K1_2 C13_1 94.43(5) . . ?
C26_2 K1_2 C13_1 118.17(5) . . ?
N1_2 K1_2 C12_1 173.49(5) . . ?
N1_1 K1_2 C12_1 89.30(5) . . ?
C21_2 K1_2 C12_1 121.14(5) . . ?
C22_2 K1_2 C12_1 102.90(5) . . ?
C26_2 K1_2 C12_1 108.60(5) . . ?
C13_1 K1_2 C12_1 23.93(5) . . ?
N1_2 K1_2 B1_2 23.97(5) . . ?
N1_1 K1_2 B1_2 118.54(5) . . ?
C21_2 K1_2 B1_2 29.01(5) . . ?
C22_2 K1_2 B1_2 48.02(5) . . ?
C26_2 K1_2 B1_2 47.28(5) . . ?
C13_1 K1_2 B1_2 140.69(5) . . ?
C12_1 K1_2 B1_2 149.74(5) . . ?
N1_2 K1_2 C23_2 94.50(5) . . ?
N1_1 K1_2 C23_2 147.60(5) . . ?
C21_2 K1_2 C23_2 44.35(4) . . ?
C22_2 K1_2 C23_2 24.12(5) . . ?
C26_2 K1_2 C23_2 49.85(4) . . ?
C13_1 K1_2 C23_2 75.12(4) . . ?
C12_1 K1_2 C23_2 79.46(5) . . ?
B1_2 K1_2 C23_2 70.61(5) . . ?
N1_2 K1_2 C00Q 102.42(5) . 2_666 ?
N1_1 K1_2 C00Q 97.06(5) . 2_666 ?
C21_2 K1_2 C00Q 102.59(5) . 2_666 ?
C22_2 K1_2 C00Q 120.52(5) . 2_666 ?
C26_2 K1_2 C00Q 77.57(4) . 2_666 ?
C13_1 K1_2 C00Q 101.19(5) . 2_666 ?
C12_1 K1_2 C00Q 77.62(5) . 2_666 ?
B1_2 K1_2 C00Q 108.02(4) . 2_666 ?
C23_2 K1_2 C00Q 109.79(5) . 2_666 ?
N1_2 K1_2 K1_1 49.36(3) . . ?
N1_1 K1_2 K1_1 47.91(3) . . ?
C21_2 K1_2 K1_1 101.03(4) . . ?
C22_2 K1_2 K1_1 113.05(4) . . ?
C26_2 K1_2 K1_1 113.15(3) . . ?
C13_1 K1_2 K1_1 126.94(4) . . ?
C12_1 K1_2 K1_1 137.13(3) . . ?
B1_2 K1_2 K1_1 72.02(4) . . ?
C23_2 K1_2 K1_1 136.69(4) . . ?
C00Q K1_2 K1_1 101.92(3) 2_666 . ?
N1_2 K1_2 H1_1 115.7(4) . . ?
N1_1 K1_2 H1_1 18.8(4) . . ?
C21_2 K1_2 H1_1 164.5(4) . . ?
C22_2 K1_2 H1_1 148.2(5) . . ?
C26_2 K1_2 H1_1 166.5(5) . . ?
C13_1 K1_2 H1_1 66.9(4) . . ?
C12_1 K1_2 H1_1 70.8(4) . . ?
B1_2 K1_2 H1_1 137.4(4) . . ?
C23_2 K1_2 H1_1 140.2(5) . . ?
C00Q K1_2 H1_1 89.3(5) 2_666 . ?
K1_1 K1_2 H1_1 66.3(4) . . ?
N2_2 C1_2 C2_2 107.03(15) . . ?
N2_2 C1_2 B1_2 125.29(16) . . ?
C2_2 C1_2 B1_2 127.66(16) . . ?
C1_2 N2_2 C9_2 123.86(15) . . ?
C1_2 N2_2 C6_2 112.68(15) . . ?
C9_2 N2_2 C6_2 123.41(15) . . ?
C2_2 C3_2 H02D_2 109.5 . . ?
C2_2 C3_2 H02E_2 109.5 . . ?
H02D_2 C3_2 H02E_2 109.5 . . ?
C2_2 C3_2 H02F_2 109.5 . . ?
H02D_2 C3_2 H02F_2 109.5 . . ?
H02E_2 C3_2 H02F_2 109.5 . . ?
C2_2 C4_2 H02G_2 109.5 . . ?
C2_2 C4_2 H02H_2 109.5 . . ?
H02G_2 C4_2 H02H_2 109.5 . . ?
C2_2 C4_2 H02I_2 109.5 . . ?
H02G_2 C4_2 H02I_2 109.5 . . ?
H02H_2 C4_2 H02I_2 109.5 . . ?
C6_2 C5_2 C2_2 106.58(16) . . ?
C6_2 C5_2 H01Q_2 110.4 . . ?
C2_2 C5_2 H01Q_2 110.4 . . ?
C6_2 C5_2 H01R_2 110.4 . . ?
C2_2 C5_2 H01R_2 110.4 . . ?
H01Q_2 C5_2 H01R_2 108.6 . . ?
N2_2 C6_2 C8_2 112.44(19) . . ?
N2_2 C6_2 C5_2 100.50(15) . . ?
C8_2 C6_2 C5_2 113.5(2) . . ?
N2_2 C6_2 C7_2 112.52(17) . . ?
C8_2 C6_2 C7_2 108.0(2) . . ?
C5_2 C6_2 C7_2 109.90(19) . . ?
C6_2 C7_2 H02M_2 109.5 . . ?
C6_2 C7_2 H02N_2 109.5 . . ?
H02M_2 C7_2 H02N_2 109.5 . . ?
C6_2 C7_2 H02O_2 109.5 . . ?
H02M_2 C7_2 H02O_2 109.5 . . ?
H02N_2 C7_2 H02O_2 109.5 . . ?
C6_2 C8_2 H02V_2 109.5 . . ?
C6_2 C8_2 H02W_2 109.5 . . ?
H02V_2 C8_2 H02W_2 109.5 . . ?
C6_2 C8_2 H02X_2 109.5 . . ?
H02V_2 C8_2 H02X_2 109.5 . . ?
H02W_2 C8_2 H02X_2 109.5 . . ?
C14_2 C9_2 C10_2 119.99(17) . . ?
C14_2 C9_2 N2_2 120.62(16) . . ?
C10_2 C9_2 N2_2 119.36(16) . . ?
C11_2 C10_2 C9_2 118.68(18) . . ?
C11_2 C10_2 C15_2 119.36(18) . . ?
C9_2 C10_2 C15_2 121.93(18) . . ?
C10_2 C11_2 C12_2 121.82(18) . . ?
C10_2 C11_2 H01S_2 119.1 . . ?
C12_2 C11_2 H01S_2 119.1 . . ?
C13_2 C12_2 C11_2 119.17(19) . . ?
C13_2 C12_2 K1_1 72.18(11) . . ?
C11_2 C12_2 K1_1 98.99(13) . . ?
C13_2 C12_2 H01P_2 120.4 . . ?
C11_2 C12_2 H01P_2 120.4 . . ?
K1_1 C12_2 H01P_2 98.5 . . ?
C12_2 C13_2 C14_2 121.01(18) . . ?
C12_2 C13_2 K1_1 83.41(12) . . ?
C14_2 C13_2 K1_1 92.95(11) . . ?
C12_2 C13_2 H13_2 119.5 . . ?
C14_2 C13_2 H13_2 119.5 . . ?
K1_1 C13_2 H13_2 93.7 . . ?
C13_2 C14_2 C9_2 119.28(17) . . ?
C13_2 C14_2 C18_2 118.41(16) . . ?
C9_2 C14_2 C18_2 122.16(16) . . ?
C16_2 C15_2 C10_2 110.72(19) . . ?
C16_2 C15_2 C17_2 110.44(19) . . ?
C10_2 C15_2 C17_2 111.34(18) . . ?
C16_2 C15_2 H020_2 108.1 . . ?
C10_2 C15_2 H020_2 108.1 . . ?
C17_2 C15_2 H020_2 108.1 . . ?
C15_2 C16_2 H02J_2 109.5 . . ?
C15_2 C16_2 H02K_2 109.5 . . ?
H02J_2 C16_2 H02K_2 109.5 . . ?
C15_2 C16_2 H02L_2 109.5 . . ?
H02J_2 C16_2 H02L_2 109.5 . . ?
H02K_2 C16_2 H02L_2 109.5 . . ?
C15_2 C17_2 H02S_2 109.5 . . ?
C15_2 C17_2 H02T_2 109.5 . . ?
H02S_2 C17_2 H02T_2 109.5 . . ?
C15_2 C17_2 H02U_2 109.5 . . ?
H02S_2 C17_2 H02U_2 109.5 . . ?
H02T_2 C17_2 H02U_2 109.5 . . ?
C14_2 C18_2 C19_2 110.66(15) . . ?
C14_2 C18_2 C20_2 111.76(16) . . ?
C19_2 C18_2 C20_2 110.23(16) . . ?
C14_2 C18_2 H18_2 108.0 . . ?
C19_2 C18_2 H18_2 108.0 . . ?
C20_2 C18_2 H18_2 108.0 . . ?
C18_2 C19_2 K1_1 105.31(11) . . ?
C18_2 C19_2 H01G_2 109.5 . . ?
K1_1 C19_2 H01G_2 144.9 . . ?
C18_2 C19_2 H01H_2 109.5 . . ?
K1_1 C19_2 H01H_2 52.6 . . ?
H01G_2 C19_2 H01H_2 109.5 . . ?
C18_2 C19_2 H01I_2 109.5 . . ?
K1_1 C19_2 H01I_2 61.7 . . ?
H01G_2 C19_2 H01I_2 109.5 . . ?
H01H_2 C19_2 H01I_2 109.5 . . ?
C18_2 C20_2 H024_2 109.5 . . ?
C18_2 C20_2 H025_2 109.5 . . ?
H024_2 C20_2 H025_2 109.5 . . ?
C18_2 C20_2 H026_2 109.5 . . ?
H024_2 C20_2 H026_2 109.5 . . ?
H025_2 C20_2 H026_2 109.5 . . ?
C23_2 C22_2 C21_2 120.85(17) . . ?
C23_2 C22_2 C00R 118.88(16) . . ?
C21_2 C22_2 C00R 120.25(16) . . ?
C23_2 C22_2 K1_2 91.56(10) . . ?
C21_2 C22_2 K1_2 71.11(9) . . ?
C00R C22_2 K1_2 106.26(11) . . ?
C26_2 C21_2 C22_2 118.53(16) . . ?
C26_2 C21_2 B1_2 120.37(15) . . ?
C22_2 C21_2 B1_2 119.81(15) . . ?
C26_2 C21_2 K1_2 87.55(10) . . ?
C22_2 C21_2 K1_2 81.96(10) . . ?
B1_2 C21_2 K1_2 89.09(9) . . ?
C24_2 C23_2 C22_2 118.89(17) . . ?
C24_2 C23_2 C01D 119.55(18) . . ?
C22_2 C23_2 C01D 121.55(18) . . ?
C24_2 C23_2 K1_2 86.89(10) . . ?
C22_2 C23_2 K1_2 64.32(9) . . ?
C01D C23_2 K1_2 119.70(12) . . ?
C23_2 C24_2 C25_2 122.15(17) . . ?
C23_2 C24_2 H24_2 118.9 . . ?
C25_2 C24_2 H24_2 118.9 . . ?
C24_2 C25_2 C26_2 118.74(17) . . ?
C24_2 C25_2 C01F 119.51(17) . . ?
C26_2 C25_2 C01F 121.74(18) . . ?
C25_2 C26_2 C21_2 120.76(16) . . ?
C25_2 C26_2 C00Q 118.75(16) . . ?
C21_2 C26_2 C00Q 120.48(16) . . ?
C25_2 C26_2 K1_2 92.71(10) . . ?
C21_2 C26_2 K1_2 66.46(9) . . ?
C00Q C26_2 K1_2 110.33(10) . . ?
C1_2 C2_2 C3_2 114.71(16) . . ?
C1_2 C2_2 C5_2 103.78(15) . . ?
C3_2 C2_2 C5_2 111.64(16) . . ?
C1_2 C2_2 C4_2 110.35(16) . . ?
C3_2 C2_2 C4_2 106.61(18) . . ?
C5_2 C2_2 C4_2 109.74(17) . . ?
B1_2 N1_2 K1_2 103.56(11) . . ?
B1_2 N1_2 K1_1 158.18(12) . . ?
K1_2 N1_2 K1_1 81.41(4) . . ?
B1_2 N1_2 H1_2 110.0(17) . . ?
K1_2 N1_2 H1_2 145.3(17) . . ?
K1_1 N1_2 H1_2 64.1(17) . . ?
N1_2 B1_2 C1_2 126.79(17) . . ?
N1_2 B1_2 C21_2 112.55(15) . . ?
C1_2 B1_2 C21_2 120.60(15) . . ?
N1_2 B1_2 K1_2 52.47(9) . . ?
C1_2 B1_2 K1_2 165.14(12) . . ?
C21_2 B1_2 K1_2 61.90(8) . . ?
 
_refine_diff_density_max    0.849
_refine_diff_density_min   -0.620
_refine_diff_density_rms    0.049

_shelx_res_file
;
TITL GuBC244_GuBC_ref_abs_a.res in P-1
    GuBC244_GuBC_ref_abs_a.res
    created by SHELXL-2018/3 at 15:46:23 on 26-Oct-2019
REM Old TITL GuBC244_GuBC_ref_abs in P-1
REM SHELXT solution in P-1
REM R1 0.144,  Rweak 0.012,  Alpha 0.058,  Orientation as input
REM Formula found by SHELXT:  C61 B N4 K2
CELL  1.54184  10.7085  16.6116  18.0545   69.131   89.791   74.733
ZERR    2.000   0.0002   0.0003   0.0004    0.002    0.002    0.002
LATT  1
SFAC C H B N K
UNIT 120 180 4 8 4
L.S. 10
temp -173
BOND $H
LIST 6
acta
FMAP 2
PLAN 20
shel 999 0.82
dfix_1 0.91 N1 H1
dfix_2 0.91 N1 H1
WGHT    0.062700    1.589900
FVAR       0.35439
C00Q  1    0.643892    0.418106    0.466244    11.00000    0.02942    0.02293 =
         0.02653   -0.00693    0.00723   -0.00565
AFIX 137
H00A  2    0.691721    0.359753    0.505832    11.00000   -1.50000
H00C  2    0.632333    0.412193    0.414785    11.00000   -1.50000
H00D  2    0.558522    0.438762    0.483563    11.00000   -1.50000
AFIX   0
C00R  1    0.858029    0.651685    0.297355    11.00000    0.03266    0.02842 =
         0.03744   -0.01010    0.00541   -0.01264
AFIX 137
H00E  2    0.952681    0.640891    0.299824    11.00000   -1.50000
H00F  2    0.816124    0.715696    0.284664    11.00000   -1.50000
H00G  2    0.829007    0.633406    0.255961    11.00000   -1.50000
AFIX   0
C01D  1    0.931072    0.679063    0.440802    11.00000    0.02601    0.04004 =
         0.05680   -0.02790   -0.00042   -0.00988
AFIX 137
H01T  2    0.931811    0.688047    0.491564    11.00000   -1.50000
H01U  2    0.889204    0.736357    0.397836    11.00000   -1.50000
H01V  2    1.020633    0.656145    0.430137    11.00000   -1.50000
AFIX   0
C01F  1    0.729278    0.443216    0.608311    11.00000    0.03176    0.05099 =
         0.02376   -0.01207    0.00375   -0.00462
AFIX 137
H01Z  2    0.768483    0.458707    0.648477    11.00000   -1.50000
H010  2    0.766214    0.379190    0.618597    11.00000   -1.50000
H011  2    0.634993    0.456272    0.610952    11.00000   -1.50000
AFIX   0
REM #####
RESI 1
B1    3    0.243822    0.913015    0.247166    11.00000    0.02145    0.02571 =
         0.02242   -0.00884    0.00637   -0.01012
H1    2    0.343330    0.828786    0.340911    11.00000    0.03401
K1    5    0.332463    0.725464    0.206860    11.00000    0.03099    0.03693 =
         0.03538   -0.01959   -0.00421   -0.00110
C2    1    0.098580    1.084346    0.232276    11.00000    0.02393    0.02306 =
         0.02444   -0.00489    0.00659   -0.00339
N2    4    0.281027    1.009609    0.328457    11.00000    0.02261    0.01783 =
         0.02542   -0.00725    0.00550   -0.00730
C3    1   -0.033987    1.063680    0.235524    11.00000    0.02169    0.03948 =
         0.04333   -0.01461    0.00400   -0.00293
AFIX 137
H014  2   -0.104090    1.120028    0.217771    11.00000   -1.50000
H015  2   -0.043154    1.027049    0.290317    11.00000   -1.50000
H016  2   -0.038959    1.030829    0.200550    11.00000   -1.50000
AFIX   0
C4    1    0.109737    1.138236    0.144762    11.00000    0.04408    0.02714 =
         0.02590   -0.00135    0.00691    0.00036
AFIX 137
H017  2    0.037637    1.193468    0.125528    11.00000   -1.50000
H018  2    0.106144    1.102135    0.112541    11.00000   -1.50000
H019  2    0.192550    1.153488    0.140381    11.00000   -1.50000
AFIX   0
C5    1    0.105173    1.137887    0.285588    11.00000    0.03127    0.01942 =
         0.03129   -0.00615    0.01021   -0.00451
AFIX  23
H00H  2    0.084405    1.202778    0.253044    11.00000   -1.20000
H00I  2    0.041869    1.128722    0.325730    11.00000   -1.20000
AFIX   0
C6    1    0.244086    1.103523    0.326758    11.00000    0.03371    0.01860 =
         0.03702   -0.01124    0.00960   -0.01034
C7    1    0.249603    1.107402    0.409509    11.00000    0.04697    0.02827 =
         0.04588   -0.02018    0.00483   -0.01175
AFIX 137
H01W  2    0.224080    1.170197    0.405137    11.00000   -1.50000
H01X  2    0.338417    1.078102    0.435687    11.00000   -1.50000
H01Y  2    0.189869    1.076409    0.441048    11.00000   -1.50000
AFIX   0
C8    1    0.331813    1.158229    0.277107    11.00000    0.04398    0.02719 =
         0.06383   -0.01319    0.01661   -0.02006
AFIX 137
H02A  2    0.293252    1.222023    0.267180    11.00000   -1.50000
H02B  2    0.339803    1.149562    0.226189    11.00000   -1.50000
H02C  2    0.418168    1.137891    0.306379    11.00000   -1.50000
AFIX   0
C9    1    0.369579    0.936798    0.390068    11.00000    0.02369    0.02261 =
         0.02185   -0.01109    0.00357   -0.00852
C10   1    0.319936    0.885557    0.457649    11.00000    0.02536    0.02228 =
         0.02287   -0.01121    0.00508   -0.00832
C11   1    0.406192    0.812022    0.516280    11.00000    0.03272    0.02717 =
         0.02206   -0.00897    0.00562   -0.00702
AFIX  43
H11   2    0.373352    0.776500    0.561507    11.00000   -1.20000
AFIX   0
C12   1    0.538902    0.790113    0.509472    11.00000    0.02985    0.03366 =
         0.02626   -0.01048   -0.00208   -0.00212
AFIX  43
H12   2    0.596572    0.740429    0.549995    11.00000   -1.20000
AFIX   0
C13   1    0.586416    0.841165    0.443272    11.00000    0.02197    0.04147 =
         0.03097   -0.01746    0.00189   -0.00631
AFIX  43
H13   2    0.677457    0.826466    0.439177    11.00000   -1.20000
AFIX   0
C14   1    0.504189    0.913675    0.382350    11.00000    0.02287    0.03171 =
         0.02709   -0.01473    0.00476   -0.00971
C15   1    0.174762    0.905194    0.467017    11.00000    0.02606    0.02358 =
         0.02523   -0.00671    0.01001   -0.00729
AFIX  13
H15   2    0.130372    0.964932    0.425277    11.00000   -1.20000
AFIX   0
C16   1    0.118228    0.835437    0.453684    11.00000    0.03110    0.03041 =
         0.03243   -0.00697    0.00941   -0.01500
AFIX 137
H01A  2    0.023402    0.853799    0.453508    11.00000   -1.50000
H01B  2    0.154536    0.777049    0.496597    11.00000   -1.50000
H01C  2    0.140501    0.830740    0.402398    11.00000   -1.50000
AFIX   0
C17   1    0.145698    0.910850    0.548352    11.00000    0.03673    0.03379 =
         0.03030   -0.01233    0.01482   -0.00784
AFIX 137
H01D  2    0.051437    0.926223    0.551285    11.00000   -1.50000
H01E  2    0.179847    0.957177    0.555397    11.00000   -1.50000
H01F  2    0.187199    0.852772    0.590464    11.00000   -1.50000
AFIX   0
C18   1    0.561011    0.961584    0.307488    11.00000    0.02171    0.04199 =
         0.03524   -0.01144    0.00916   -0.01282
AFIX  13
H18   2    0.488582    1.010906    0.270362    11.00000   -1.20000
AFIX   0
C19   1    0.620291    0.896595    0.265807    11.00000    0.03220    0.05374 =
         0.03267   -0.01333    0.01308   -0.00401
AFIX 137
H027  2    0.651709    0.929063    0.216005    11.00000   -1.50000
H028  2    0.553981    0.870725    0.254077    11.00000   -1.50000
H029  2    0.693088    0.848445    0.300689    11.00000   -1.50000
AFIX   0
C20   1    0.662310    1.003508    0.326009    11.00000    0.03579    0.06608 =
         0.06303   -0.01557    0.00884   -0.03117
AFIX 137
H02P  2    0.690049    1.039095    0.276110    11.00000   -1.50000
H02Q  2    0.737673    0.955885    0.358730    11.00000   -1.50000
H02R  2    0.624107    1.042403    0.355053    11.00000   -1.50000
AFIX   0
C21   1    0.186005    0.917728    0.161919    11.00000    0.01954    0.01956 =
         0.02287   -0.00447    0.00225   -0.00458
C22   1    0.087757    0.875939    0.158836    11.00000    0.02000    0.02343 =
         0.02537   -0.00316    0.00099   -0.00574
C23   1    0.058830    0.859604    0.090870    11.00000    0.02263    0.02830 =
         0.03130   -0.00702   -0.00400   -0.00651
C24   1    0.126218    0.887393    0.024656    11.00000    0.03082    0.03212 =
         0.02512   -0.00946   -0.00362   -0.00636
AFIX  43
H24   2    0.107080    0.876168   -0.021475    11.00000   -1.20000
AFIX   0
C25   1    0.220644    0.931069    0.024129    11.00000    0.02970    0.02297 =
         0.02287   -0.00440    0.00232   -0.00413
C26   1    0.250890    0.945940    0.092942    11.00000    0.02207    0.01912 =
         0.02467   -0.00491    0.00327   -0.00427
C27   1    0.015527    0.844364    0.231273    11.00000    0.02852    0.03706 =
         0.03317   -0.00824    0.00711   -0.01718
AFIX 137
H01J  2   -0.078393    0.869498    0.216068    11.00000   -1.50000
H01K  2    0.040785    0.864519    0.272320    11.00000   -1.50000
H01L  2    0.037526    0.778678    0.252226    11.00000   -1.50000
AFIX   0
C28   1   -0.040083    0.809895    0.088635    11.00000    0.03266    0.04788 =
         0.04422   -0.01757   -0.00226   -0.01705
AFIX 137
H021  2   -0.125029    0.842563    0.098428    11.00000   -1.50000
H022  2   -0.012563    0.749521    0.129833    11.00000   -1.50000
H023  2   -0.046714    0.805412    0.036198    11.00000   -1.50000
AFIX   0
C29   1    0.289684    0.960112   -0.049604    11.00000    0.04501    0.03535 =
         0.02435   -0.00844    0.00911   -0.01228
AFIX 137
H01M  2    0.255645    0.943749   -0.090875    11.00000   -1.50000
H01N  2    0.383154    0.930169   -0.036737    11.00000   -1.50000
H01O  2    0.275116    1.025290   -0.069112    11.00000   -1.50000
AFIX   0
C30   1    0.355428    0.992148    0.092564    11.00000    0.03017    0.02466 =
         0.02968   -0.00941    0.01075   -0.01215
AFIX 137
H00J  2    0.331774    1.051227    0.049390    11.00000   -1.50000
H00K  2    0.438570    0.955681    0.084369    11.00000   -1.50000
H00M  2    0.363623    0.999453    0.143688    11.00000   -1.50000
AFIX   0
C1    1    0.210667    0.998549    0.269107    11.00000    0.02086    0.02151 =
         0.02114   -0.00482    0.00551   -0.00758
N1    4    0.323132    0.827787    0.293461    11.00000    0.03142    0.02574 =
         0.02434   -0.01152   -0.00111   -0.00321
RESI 0
RESI 2
K1    5    0.530144    0.687023    0.381629    11.00000    0.03249    0.03001 =
         0.02812   -0.01154    0.00059    0.00107
H1    2    0.510530    0.583357    0.244923    11.00000    0.04713
C1    1    0.757628    0.489957    0.248580    11.00000    0.03220    0.02111 =
         0.02130   -0.00678    0.00403   -0.00789
N2    4    0.717938    0.505055    0.170107    11.00000    0.03713    0.02546 =
         0.02144   -0.00947    0.00201   -0.00365
C3    1    1.004008    0.447482    0.289882    11.00000    0.03115    0.05232 =
         0.04189   -0.02481    0.00100   -0.00437
AFIX 137
H02D  2    1.083825    0.397861    0.301738    11.00000   -1.50000
H02E  2    0.989725    0.465779    0.335895    11.00000   -1.50000
H02F  2    1.012461    0.498365    0.243445    11.00000   -1.50000
AFIX   0
C4    1    0.880452    0.337576    0.347152    11.00000    0.05212    0.03008 =
         0.03515   -0.00651    0.01138    0.00313
AFIX 137
H02G  2    0.959655    0.287890    0.356919    11.00000   -1.50000
H02H  2    0.804593    0.317820    0.339477    11.00000   -1.50000
H02I  2    0.872193    0.356506    0.392947    11.00000   -1.50000
AFIX   0
C5    1    0.906012    0.386736    0.200575    11.00000    0.03749    0.03405 =
         0.03466   -0.01774    0.00851   -0.00343
AFIX  23
H01Q  2    0.998776    0.372715    0.190609    11.00000   -1.20000
H01R  2    0.876259    0.332473    0.210856    11.00000   -1.20000
AFIX   0
C6    1    0.824717    0.464180    0.129512    11.00000    0.04445    0.03977 =
         0.02805   -0.01698    0.00747   -0.00248
C7    1    0.906866    0.529132    0.087445    11.00000    0.05112    0.04697 =
         0.03735   -0.00881    0.01887   -0.00480
AFIX 137
H02M  2    0.987016    0.495450    0.073412    11.00000   -1.50000
H02N  2    0.928825    0.556784    0.123477    11.00000   -1.50000
H02O  2    0.856444    0.576029    0.038977    11.00000   -1.50000
AFIX   0
C8    1    0.774315    0.434890    0.068505    11.00000    0.05637    0.07086 =
         0.04660   -0.03740    0.00356   -0.00360
AFIX 137
H02V  2    0.847395    0.408629    0.043688    11.00000   -1.50000
H02W  2    0.714444    0.486909    0.027585    11.00000   -1.50000
H02X  2    0.728292    0.390064    0.094522    11.00000   -1.50000
REM #####
AFIX   0
C9    1    0.587598    0.551581    0.132963    11.00000    0.03820    0.02547 =
         0.01931   -0.00996    0.00281   -0.01197
C10   1    0.492440    0.504473    0.145762    11.00000    0.04990    0.03196 =
         0.02203   -0.01091    0.00317   -0.02081
C11   1    0.365822    0.551138    0.112103    11.00000    0.04696    0.04528 =
         0.03188   -0.01765    0.00708   -0.02823
AFIX  43
H01S  2    0.300869    0.520171    0.121649    11.00000   -1.20000
AFIX   0
C12   1    0.331415    0.641894    0.064828    11.00000    0.03502    0.04477 =
         0.03331   -0.01864   -0.00165   -0.01264
AFIX  43
H01P  2    0.244364    0.672337    0.041781    11.00000   -1.20000
AFIX   0
C13   1    0.425437    0.687354    0.051740    11.00000    0.03883    0.02867 =
         0.02503   -0.00898    0.00012   -0.01001
AFIX  43
H13   2    0.402706    0.749190    0.018765    11.00000   -1.20000
AFIX   0
C14   1    0.553494    0.643706    0.086297    11.00000    0.03519    0.02607 =
         0.01994   -0.00955    0.00414   -0.01155
C15   1    0.524096    0.404810    0.197474    11.00000    0.06179    0.03129 =
         0.03341   -0.00812    0.00173   -0.02541
AFIX  13
H020  2    0.620325    0.381393    0.211969    11.00000   -1.20000
AFIX   0
C16   1    0.458300    0.391181    0.274300    11.00000    0.07272    0.04737 =
         0.03341   -0.00740    0.00622   -0.03535
AFIX 137
H02J  2    0.483103    0.327183    0.307736    11.00000   -1.50000
H02K  2    0.363656    0.412865    0.261518    11.00000   -1.50000
H02L  2    0.485850    0.424736    0.303027    11.00000   -1.50000
AFIX   0
C17   1    0.484506    0.351377    0.152211    11.00000    0.08602    0.04068 =
         0.04698   -0.01719    0.00716   -0.03416
AFIX 137
H02S  2    0.516626    0.287044    0.183965    11.00000   -1.50000
H02T  2    0.522133    0.364402    0.101141    11.00000   -1.50000
H02U  2    0.389465    0.368547    0.142610    11.00000   -1.50000
AFIX   0
C18   1    0.648655    0.699389    0.076768    11.00000    0.03327    0.02770 =
         0.02776   -0.00793    0.00580   -0.01234
AFIX  13
H18   2    0.734441    0.658272    0.105490    11.00000   -1.20000
AFIX   0
C19   1    0.603019    0.769899    0.114434    11.00000    0.03668    0.03026 =
         0.04009   -0.01334    0.00532   -0.01689
AFIX 137
H01G  2    0.664946    0.805639    0.107076    11.00000   -1.50000
H01H  2    0.597873    0.739966    0.171487    11.00000   -1.50000
H01I  2    0.516980    0.809294    0.088887    11.00000   -1.50000
AFIX   0
C20   1    0.668665    0.744438   -0.010881    11.00000    0.05120    0.03731 =
         0.03408   -0.00670    0.01200   -0.02018
AFIX 137
H024  2    0.735761    0.775609   -0.014436    11.00000   -1.50000
H025  2    0.586833    0.787778   -0.039623    11.00000   -1.50000
H026  2    0.696196    0.698736   -0.034636    11.00000   -1.50000
AFIX   0
C22   1    0.821369    0.597696    0.377118    11.00000    0.02114    0.02238 =
         0.03022   -0.01065    0.00236   -0.00354
C21   1    0.750157    0.535488    0.382138    11.00000    0.02092    0.01999 =
         0.02362   -0.00976    0.00247   -0.00211
C23   1    0.856286    0.612107    0.445233    11.00000    0.01913    0.03036 =
         0.03970   -0.01879   -0.00102   -0.00245
C24   1    0.822850    0.562661    0.518232    11.00000    0.02312    0.04368 =
         0.03151   -0.02279   -0.00210   -0.00136
AFIX  43
H24   2    0.845223    0.573076    0.564225    11.00000   -1.20000
AFIX   0
C25   1    0.757269    0.497950    0.526408    11.00000    0.02159    0.03317 =
         0.02378   -0.01139    0.00171    0.00152
C26   1    0.719621    0.485367    0.457842    11.00000    0.02036    0.02119 =
         0.02401   -0.00848    0.00332   -0.00053
C2    1    0.888165    0.416859    0.271984    11.00000    0.03314    0.02667 =
         0.02632   -0.01068    0.00553   -0.00360
N1    4    0.548928    0.589042    0.286220    11.00000    0.02779    0.02787 =
         0.02410   -0.01307    0.00164   -0.00644
B1    3    0.679445    0.537809    0.301565    11.00000    0.02866    0.01791 =
         0.02049   -0.00575    0.00417   -0.01061
RESI 0
HKLF 4


REM  GuBC244_GuBC_ref_abs_a.res in P-1
REM wR2 = 0.1249, GooF = S = 1.020, Restrained GooF = 1.020 for all data
REM R1 = 0.0479 for 9554 Fo > 4sig(Fo) and 0.0551 for all 10919 data
REM 645 parameters refined using 2 restraints

END

WGHT      0.0627      1.5846

REM Highest difference peak  0.849,  deepest hole -0.620,  1-sigma level  0.049
Q1    1   0.5730  0.7247  0.3598  11.00000  0.05    0.85
Q2    1   0.5435  0.7183  0.4143  11.00000  0.05    0.53
Q3    1   0.3767  0.8501  0.2630  11.00000  0.05    0.38
Q4    1   0.8067  0.5024  0.0461  11.00000  0.05    0.35
Q5    1   0.4427  0.4317  0.2018  11.00000  0.05    0.35
Q6    1   0.7583  0.3537  0.1408  11.00000  0.05    0.32
Q7    1   0.2318  0.9402  0.0576  11.00000  0.05    0.31
Q8    1   0.4730  0.8070  0.5110  11.00000  0.05    0.30
Q9    1   0.2105  0.9195  0.2041  11.00000  0.05    0.30
Q10   1   0.7698  0.4351  0.1326  11.00000  0.05    0.29
Q11   1   0.1039  0.8611  0.0654  11.00000  0.05    0.29
Q12   1   0.3253  0.7142  0.1600  11.00000  0.05    0.28
Q13   1   0.2802  0.6909  0.2321  11.00000  0.05    0.28
Q14   1   0.7895  0.5291  0.5201  11.00000  0.05    0.28
Q15   1   0.4453  0.9286  0.3892  11.00000  0.05    0.28
Q16   1   0.4237  0.5310  0.1535  11.00000  0.05    0.28
Q17   1   0.7246  0.5295  0.3478  11.00000  0.05    0.27
Q18   1   0.2004  0.8949  0.0331  11.00000  0.05    0.27
Q19   1   0.8323  0.6057  0.4134  11.00000  0.05    0.26
Q20   1   0.0352  1.0780  0.2296  11.00000  0.05    0.26
;
_shelx_res_checksum   57168

_shelx_hkl_file
;
   0   0  -1  208.43    9.31
   0   0  -2  140.95    6.52
   0   0  -3   74.42    3.74
   0   0   3   68.49    3.58
   0   0  -4   36.73    2.59
   0   0   4   40.59    2.45
   0   0   5  641.59   28.76
   0   0   6  356.08   17.30
   0   0  -6  391.33   17.03
   0   0   7   10.11    2.09
   0   0  -7    7.27    1.17
   0   0   8    2.47    2.25
   0   0   8    1.01    1.07
   0   0  -8    0.72    1.09
   0   0  -9   82.89    4.27
   0   0   9   78.33    4.05
   0   0  10   28.14    3.01
   0   0  10   28.50    1.93
   0   0  11  128.94    7.07
   0   0 -11  123.05    6.08
   0   0  11  120.10    5.90
   0   0  12  235.00   12.69
   0   0  12  257.18   11.59
   0   0  12  250.28   11.78
   0   0 -12  250.68   11.76
   0   0  13  229.54   12.64
   0   0  13  236.25   11.65
   0   0  13  259.66   11.47
   0   0 -13  249.15   13.05
   0   0 -13  246.96   11.62
   0   0  14    5.90    1.67
   0   0 -14    8.97    2.59
   0   0 -14    5.11    1.92
   0   0  14    6.93    2.70
   0   0 -15   13.07    2.06
   0   0  15   13.72    1.92
   0   0 -15   13.62    2.87
   0   0 -16   17.57    2.25
   0   0  16   15.55    1.95
   0   0 -16   12.25    2.79
   0   0 -17  120.23    6.06
   0   0  17  124.96    6.14
   0   0 -17  124.66    6.37
   0   0 -18    5.85    1.31
   0   0 -18    8.89    1.80
   0   0  18    8.65    1.46
   0   0 -19    5.22    1.03
   0   0 -19    5.72    1.21
   0   0  19    5.40    1.16
   0   0 -19    4.65    1.47
   0   0 -20    0.66    0.81
   0   0  20    0.21    0.79
   0   0 -20    0.11    1.07
   0   0  21   13.14    1.00
   0   0 -21   15.17    1.05
   0   1 -20    1.89    0.73
   0   1 -20    1.74    0.87
   0   1 -19    0.11    0.95
   0  -1  19    0.74    0.95
   0  -1  18   25.74    1.95
   0  -1  18   26.96    1.98
   0   1 -18   23.94    2.14
   0   1 -17   -0.42    1.65
   0  -1  17    0.51    1.37
   0   1 -17    0.62    1.13
   0   1 -16  119.71    6.18
   0  -1  16  119.00    6.00
   0   1 -15    4.19    1.89
   0   1 -15    1.71    2.22
   0  -1  15    2.52    1.64
   0   1 -14  335.41   16.22
   0   1 -14  321.86   17.64
   0  -1  14  372.97   16.11
   0   1 -13   37.04    2.80
   0  -1  13   34.05    3.55
   0   1 -13   32.65    3.89
   0  -1  13   42.17    2.62
   0   1 -12  124.94    6.41
   0  -1  12  115.52    7.15
   0   1 -12  121.57    7.63
   0  -1  12  136.24    6.25
   0   1 -11  210.69    9.75
   0   1 -11  209.25   10.97
   0  -1  11  199.17   10.47
   0  -1  11  203.27    9.53
   0   1 -10    6.28    2.25
   0  -1  10    8.80    2.15
   0  -1  10    3.37    1.16
   0   1  -9  496.88   22.06
   0  -1   9  487.14   21.64
   0   1  -9  481.51   21.25
   0  -1   9  447.09   20.82
   0   1  -8    0.92    2.34
   0  -1   8   -0.73    1.91
   0   1  -8    1.16    1.26
   0  -1   8    0.73    1.08
   0  -1   7  207.53   10.17
   0  -1   7  211.46    9.53
   0  -1   6  273.21   12.70
   0  -1   5  151.75    7.27
   0  -1   4  186.03    8.53
   0  -1   4  217.87    8.94
   0  -1   3  189.84    8.48
   0  -1   3  177.02    8.97
   0  -1   3  196.65    8.70
   0  -1   2   37.62    2.15
   0  -1   2   30.48    1.76
   0  -1   1 1000.17   44.22
   0  -1   0   25.26    1.28
   0   1   1 1155.97   50.92
   0  -1  -1 1155.43   50.93
   0   1   2   10.67    0.87
   0  -1  -2   10.23    0.81
   0  -1  -3 3597.68  138.55
   0  -1  -3 3540.68  138.29
   0  -1  -4  372.93   16.11
   0  -1  -4  348.82   15.71
   0  -1  -4  354.87   15.68
   0  -1  -5  149.03    6.64
   0  -1  -5  137.41    7.10
   0  -1  -6   85.68    4.36
   0   1   6   87.66    4.41
   0  -1  -7  105.61    5.78
   0  -1  -7  109.26    5.07
   0   1   7  103.87    5.79
   0  -1  -8  152.24    7.69
   0   1   8  139.52    6.70
   0  -1  -8  152.63    6.78
   0   1   8  137.52    7.65
   0  -1  -9   19.04    2.76
   0   1   9   20.83    1.64
   0  -1 -10  194.24    9.25
   0   1  10  200.56    9.27
   0   1  11   32.35    3.28
   0   1  11   22.00    1.80
   0   1  12  137.37    6.82
   0   1  12  145.91    8.24
   0  -1 -12  150.78    7.04
   0   1  12  139.97    7.09
   0   1  13   63.52    3.44
   0   1  13   56.53    4.77
   0  -1 -13   58.14    3.61
   0   1  13   56.32    3.83
   0   1  14   58.94    3.36
   0   1  14   49.60    4.71
   0  -1 -14   54.53    3.56
   0   1  14   53.29    3.76
   0   1  15  180.68    8.19
   0   1  15  166.53    8.29
   0  -1 -15  163.49    8.34
   0  -1 -16    0.26    1.89
   0  -1 -16    0.71    2.29
   0   1  16    0.94    1.60
   0  -1 -17   30.98    2.71
   0   1  17   31.09    2.45
   0  -1 -18    3.48    1.78
   0  -1 -18    1.35    1.36
   0   1  18    2.63    1.42
   0  -1 -19    0.47    1.39
   0  -1 -19    1.02    1.20
   0   1  19    1.49    1.17
   0  -1 -20    0.23    0.87
   0  -1 -20    0.12    1.21
   0   1  20    1.14    0.93
   0  -1 -20    1.90    0.91
   0  -1 -21    1.79    0.83
   0   2 -20   28.25    1.48
   0  -2  20   30.19    1.53
   0   2 -20   28.19    1.54
   0   2 -19   10.31    1.28
   0   2 -19   10.82    1.15
   0   2 -18   12.40    1.60
   0  -2  18   12.07    1.39
   0   2 -18   13.09    1.45
   0   2 -17   12.99    1.91
   0  -2  17   21.76    1.88
   0   2 -16   21.11    2.19
   0   2 -15    6.69    1.87
   0   2 -15    4.01    2.31
   0   2 -14  110.55    5.77
   0   2 -14  101.09    6.96
   0   2 -13   17.79    2.21
   0   2 -13   11.64    2.77
   0   2 -12   18.34    2.07
   0   2 -12   18.16    2.96
   0  -2  11    4.18    1.88
   0   2 -11    8.05    1.65
   0   2 -11    3.94    2.24
   0  -2  10   57.90    3.97
   0   2 -10   61.03    3.48
   0   2 -10   63.26    4.60
   0   2  -9   90.27    5.52
   0   2  -9   92.12    4.87
   0  -2   9   79.63    4.92
   0  -2   8   35.18    2.93
   0   2  -8   47.62    3.64
   0  -2   7    0.73    1.73
   0  -2   6   68.08    3.94
   0   2  -6   77.11    4.74
   0   2  -5  704.10   28.23
   0  -2   5  676.57   27.66
   0  -2   5  643.73   27.37
   0   2  -5  584.89   27.28
   0  -2   5  599.61   27.29
   0  -2   4   35.21    1.69
   0  -2   4   22.16    2.36
   0  -2   4   22.66    1.57
   0   2  -4   36.19    2.69
   0  -2   4   32.62    1.90
   0  -2   3  255.05   11.48
   0  -2   3  263.20   11.93
   0  -2   3  257.98   11.53
   0   2  -3  237.93   11.99
   0  -2   2  916.69   44.08
   0   2  -2 1093.63   44.26
   0  -2   1   56.16    3.07
   0  -2   1   57.39    3.07
   0  -2   0 2141.74   94.41
   0   2   1    0.35    0.56
   0   2   2   29.67    1.71
   0  -2  -2   27.78    1.64
   0   2   3   91.31    4.38
   0  -2  -3   84.66    4.26
   0   2   4  371.25   16.58
   0  -2  -4  359.13   16.51
   0  -2  -5  320.77   14.37
   0  -2  -5  322.48   14.75
   0  -2  -6  202.59    8.62
   0  -2  -6  213.32    9.22
   0   2   7  756.73   32.07
   0  -2  -7  733.40   32.06
   0  -2  -7  680.47   32.04
   0  -2  -8    7.72    2.27
   0   2   8    9.32    2.86
   0   2   8    7.19    1.13
   0  -2  -9   12.14    2.44
   0   2   9   13.82    3.12
   0   2   9    8.57    1.27
   0  -2 -10  260.28   12.21
   0   2  10  264.32   12.36
   0   2  10  233.39   11.02
   0  -2 -11   11.19    2.38
   0   2  11   10.07    1.36
   0   2  11   13.09    2.88
   0  -2 -12  231.72   12.18
   0  -2 -12  234.20   10.89
   0   2  12  231.39   10.77
   0   2  12  238.62   12.23
   0  -2 -13  176.42   10.61
   0   2  13  192.13    9.55
   0  -2 -13  201.37    9.39
   0   2  13  203.34    9.25
   0   2  13  184.73   10.73
   0  -2 -14  111.99    7.80
   0   2  14  130.17    6.80
   0   2  14  111.94    7.98
   0  -2 -14  126.73    6.61
   0   2  15   35.78    2.99
   0   2  15   26.56    4.02
   0   2  15   35.30    2.62
   0  -2 -15   30.64    2.78
   0   2  16   -2.33    2.22
   0   2  16    0.88    1.68
   0  -2 -16    0.43    1.86
   0   2  16    1.29    2.81
   0   2  17    1.88    1.60
   0  -2 -17   -1.83    2.08
   0   2  18    0.04    1.43
   0  -2 -18    2.23    1.86
   0  -2 -19   47.70    3.06
   0   2  19   57.20    3.11
   0  -2 -19   55.90    3.36
   0  -2 -20    8.21    1.29
   0   2  20    7.43    1.19
   0  -2 -20    7.30    1.46
   0  -2 -21   -0.22    0.98
   0  -2 -21    2.23    0.73
   0  -3  19    4.91    0.89
   0   3 -19    7.38    0.97
   0  -3  19    6.58    0.96
   0   3 -18    4.83    1.24
   0   3 -17   57.03    3.26
   0  -3  17   52.40    3.09
   0   3 -16   19.92    2.22
   0  -3  16   24.24    2.11
   0   3 -15    9.83    1.99
   0   3 -14  104.39    5.32
   0   3 -14   81.94    6.30
   0   3 -13  125.37    6.31
   0   3 -13  107.73    7.47
   0   3 -12    2.90    1.79
   0   3 -12    4.95    2.47
   0   3 -11    3.50    1.59
   0   3 -11    0.41    2.11
   0  -3  10   80.00    4.96
   0   3 -10   90.44    5.16
   0  -3  10   85.84    4.42
   0   3 -10   99.88    4.76
   0   3 -10   86.43    5.82
   0  -3   9  102.30    4.82
   0  -3   9   88.37    5.30
   0   3  -9   89.38    6.08
   0  -3   8  417.25   18.33
   0  -3   8  388.27   18.78
   0   3  -8  414.91   19.56
   0  -3   7  227.59   10.25
   0  -3   7  218.99   10.68
   0   3  -7  234.98   11.59
   0  -3   6    5.85    1.53
   0   3  -6    4.04    2.88
   0  -3   6    6.86    0.96
   0  -3   6    6.53    1.06
   0  -3   5  569.43   26.56
   0  -3   5  576.00   26.62
   0   3  -5  598.61   27.37
   0  -3   5  623.29   27.38
   0  -3   5  624.60   26.53
   0  -3   4  580.86   25.70
   0   3  -4  599.85   26.35
   0  -3   4  595.31   25.66
   0  -3   3  230.22   10.05
   0   3  -3  218.34   10.58
   0  -3   3  226.83    9.92
   0  -3   2    2.21    1.33
   0   3  -2    1.35    2.01
   0  -3   1  505.48   22.58
   0  -3   1  497.42   22.55
   0  -3   0  200.74    9.30
   0   3   1   33.94    2.14
   0  -3  -1   45.47    2.36
   0   3   2  418.74   18.76
   0  -3  -3 4595.12  200.21
   0   3   3 4497.23  200.20
   0  -3  -4   24.08    1.85
   0   3   4   26.50    2.13
   0  -3  -5   93.93    5.06
   0   3   5   99.96    5.26
   0  -3  -5  104.34    4.84
   0  -3  -6  114.73    5.61
   0   3   6  109.94    5.79
   0  -3  -6  105.19    5.19
   0  -3  -7 1255.51   53.77
   0  -3  -7 1182.66   53.24
   0  -3  -8    2.27    0.92
   0  -3  -8    1.92    2.00
   0  -3  -8    1.73    0.96
   0   3   8    1.85    1.05
   0  -3  -9  124.32    6.20
   0   3   9  102.38    5.04
   0   3  10    1.58    2.76
   0  -3 -10    3.66    1.98
   0   3  10    3.65    1.18
   0   3  11    1.13    2.72
   0  -3 -11    0.54    2.04
   0   3  11    0.71    1.15
   0   3  12    3.48    2.84
   0   3  12    1.19    1.22
   0  -3 -12    1.37    1.86
   0   3  13   60.54    5.35
   0   3  13   70.97    3.70
   0  -3 -13   61.89    4.98
   0   3  13   64.94    4.12
   0   3  14  211.06   12.69
   0   3  14  230.95   11.32
   0   3  14  251.33   11.07
   0  -3 -14  217.51   12.58
   0   3  15   -1.02    3.06
   0  -3 -15    2.10    1.94
   0   3  15    1.93    2.44
   0   3  15   -0.34    1.67
   0  -3 -15    2.07    2.51
   0   3  16   10.62    3.41
   0   3  16   10.60    2.38
   0  -3 -16    6.91    2.78
   0  -3 -16   11.39    2.26
   0   3  16   11.99    1.88
   0   3  17   51.79    3.54
   0  -3 -17   52.32    3.54
   0   3  17   53.29    3.29
   0  -3 -17   42.71    4.54
   0  -3 -18   29.99    2.85
   0   3  18   38.01    2.55
   0  -3 -19   31.21    2.47
   0   3  19   26.82    2.13
   0  -3 -19   28.71    2.28
   0  -3 -20    7.74    1.54
   0   3  20    6.41    1.23
   0  -3 -20    6.69    1.39
   0  -3 -21   10.73    1.32
   0  -3 -21    9.96    1.21
   0   4 -19    1.46    0.56
   0  -4  19    1.45    0.54
   0  -4  18   24.75    1.65
   0  -4  18   20.97    1.51
   0   4 -18   24.08    1.62
   0   4 -17   13.66    1.57
   0  -4  17   13.94    1.34
   0   4 -17   13.60    1.47
   0  -4  17   14.78    1.42
   0  -4  16    2.35    1.20
   0  -4  16    3.05    1.28
   0   4 -16    3.88    1.47
   0   4 -16    2.73    1.30
   0  -4  15   -0.31    1.27
   0  -4  15    0.70    1.51
   0   4 -15   -0.33    1.73
   0   4 -15    1.88    1.43
   0  -4  14    1.69    1.41
   0   4 -14   -1.30    1.92
   0  -4  14    0.56    1.36
   0  -4  14    1.99    1.61
   0  -4  13   18.83    2.00
   0   4 -13   26.22    3.37
   0   4 -13   26.87    2.40
   0   4 -12   21.10    3.22
   0   4 -12   24.63    2.55
   0  -4  11  222.71    9.95
   0   4 -11  188.93   11.29
   0   4 -11  208.86   10.22
   0   4 -10  445.09   20.45
   0  -4  10  422.70   19.46
   0   4 -10  413.14   20.88
   0   4 -10  450.09   19.79
   0   4  -9   14.90    2.08
   0  -4   9   12.70    1.33
   0   4  -9    8.82    2.51
   0   4  -9   10.82    1.73
   0   4  -8    1.57    2.17
   0  -4   8    1.13    1.01
   0   4  -7  153.85    8.33
   0  -4   7  138.38    7.12
   0  -4   7  152.65    6.86
   0  -4   6    2.40    1.21
   0   4  -6   -0.28    2.93
   0  -4   6    2.18    0.98
   0  -4   6    1.32    2.19
   0  -4   5   96.50    5.37
   0  -4   5   94.10    5.18
   0   4  -5  103.12    6.57
   0  -4   5  122.52    5.40
   0  -4   5  113.46    5.03
   0  -4   5  125.90    6.42
   0  -4   4    2.17    0.98
   0  -4   4    2.33    1.32
   0   4  -4    6.23    2.91
   0  -4   4    6.50    2.16
   0  -4   3   21.61    1.80
   0  -4   3   22.86    1.40
   0   4  -3   25.74    3.03
   0   4  -2   10.48    2.18
   0  -4   2   19.37    1.91
   0  -4   1   19.81    1.92
   0  -4   1   23.65    1.97
   0  -4   0  450.04   20.01
   0  -4   0  433.59   20.00
   0   4   1  949.27   39.82
   0  -4  -1  825.86   39.96
   0   4   2   10.41    1.40
   0  -4  -2    8.84    1.45
   0   4   3    1.00    1.42
   0   4   4  142.61    6.98
   0  -4  -5  185.63    8.79
   0   4   5  180.97    8.88
   0  -4  -6  673.57   30.00
   0   4   6  668.79   30.11
   0  -4  -6  656.56   29.73
   0  -4  -7  100.53    5.43
   0   4   7  100.20    5.76
   0  -4  -7   99.41    5.01
   0   4   8  151.90    8.44
   0  -4  -8  152.45    7.50
   0  -4  -8  160.20    8.12
   0  -4  -8  163.40    7.51
   0   4   9   95.82    4.72
   0  -4  -9   82.85    4.60
   0  -4  -9   92.00    5.57
   0   4   9   93.48    4.46
   0  -4  -9  102.08    4.69
   0  -4 -10  162.69    8.72
   0   4  10  165.36    7.63
   0  -4 -11   37.73    3.19
   0   4  11   22.99    1.80
   0   4  12    2.44    2.96
   0   4  12    3.39    1.20
   0  -4 -12    1.12    2.05
   0   4  13    8.22    2.29
   0   4  13    9.88    3.36
   0   4  13    8.39    1.52
   0  -4 -13   13.30    2.72
   0   4  14   42.59    3.62
   0   4  14   53.63    5.17
   0   4  14   48.60    2.96
   0  -4 -14   40.61    4.23
   0   4  15   40.28    3.51
   0   4  15   31.55    4.53
   0   4  15   39.76    2.74
   0  -4 -15   32.60    4.01
   0   4  16  134.27    6.74
   0   4  16  116.61    8.24
   0   4  16  122.55    6.26
   0  -4 -16  106.98    7.82
   0   4  17   28.87    2.82
   0   4  17   23.44    4.09
   0  -4 -17   22.63    3.51
   0   4  17   29.58    2.38
   0   4  18   91.70    4.77
   0   4  18   86.83    4.91
   0   4  19   91.41    4.36
   0  -4 -19   71.16    4.34
   0   4  20    2.00    1.18
   0  -4 -20    2.43    1.41
   0  -4 -21    0.62    1.12
   0  -4 -22    1.20    0.67
   0  -5  18   13.81    1.07
   0   5 -18   14.19    1.10
   0   5 -18   14.04    1.05
   0   5 -17    2.06    0.98
   0  -5  17    2.34    0.82
   0  -5  17    3.27    0.87
   0  -5  17    4.17    1.10
   0   5 -17    3.19    1.10
   0  -5  16    4.76    1.12
   0   5 -16    5.19    1.19
   0  -5  16    4.24    1.19
   0   5 -16    4.08    1.38
   0  -5  15    5.07    1.29
   0   5 -15    5.29    1.41
   0  -5  15    5.52    1.51
   0   5 -15    6.00    1.60
   0  -5  14   87.27    4.40
   0   5 -14   85.50    4.70
   0   5 -14   84.72    4.59
   0  -5  14   89.05    4.64
   0  -5  14   77.13    4.47
   0   5 -13  142.90    7.37
   0  -5  13  154.21    7.09
   0  -5  13  150.42    7.34
   0   5 -13  146.99    7.28
   0   5 -12    0.38    1.84
   0   5 -12    1.07    2.20
   0  -5  12    4.76    1.40
   0  -5  12    4.00    1.70
   0  -5  11   28.34    2.18
   0   5 -11   32.53    3.55
   0   5 -11   32.72    2.75
   0   5 -10   27.36    2.82
   0  -5  10   24.61    1.86
   0   5 -10   19.17    2.93
   0   5 -10   19.64    2.36
   0   5  -9   17.67    2.54
   0  -5   9   16.81    1.57
   0   5  -9   23.00    2.96
   0   5  -9   21.99    2.09
   0  -5   8  104.41    5.17
   0   5  -8  111.26    6.64
   0   5  -8  115.15    5.64
   0  -5   7  134.75    6.20
   0   5  -7  120.75    7.60
   0  -5   6   27.84    3.22
   0  -5   6   33.81    1.93
   0  -5   5    1.10    2.09
   0   5  -5    4.29    3.23
   0  -5   5    1.50    1.43
   0  -5   5    2.80    0.94
   0  -5   5    3.32    1.54
   0  -5   5    3.14    0.88
   0  -5   4  152.46    7.26
   0   5  -4  118.79    7.54
   0  -5   4  115.35    5.93
   0  -5   4  140.85    5.93
   0  -5   4  126.46    6.51
   0  -5   3  143.44    6.72
   0   5  -3  144.68    8.12
   0  -5   3  151.38    7.33
   0  -5   2  171.61    8.42
   0  -5   2  156.18    8.35
   0   5  -2  172.03    8.87
   0  -5   2  175.35    8.23
   0  -5   1   82.30    4.62
   0  -5   1   86.37    4.69
   0  -5   0  545.77   24.56
   0  -5   0  538.05   24.55
   0  -5  -1   70.23    3.93
   0  -5  -2   19.11    1.71
   0   5   2   11.80    1.58
   0  -5  -3    2.49    1.28
   0   5   3    4.63    1.48
   0   5   4   38.69    2.73
   0   5   5 6781.35  298.83
   0  -5  -6   70.27    3.89
   0   5   6   71.50    4.46
   0  -5  -6   67.98    4.16
   0   5   7  127.64    7.19
   0  -5  -7  127.50    6.54
   0  -5  -7  138.72    6.90
   0  -5  -8    4.75    1.56
   0   5   8    5.56    3.05
   0  -5  -8    2.90    2.04
   0   5   9   29.08    1.78
   0  -5  -9   34.23    2.31
   0  -5  -9   27.52    2.94
   0   5   9   27.04    3.94
   0  -5  -9   27.83    2.26
   0  -5 -10  336.73   14.10
   0   5  10  310.26   13.77
   0  -5 -10  314.81   14.94
   0   5  10  307.48   14.10
   0   5  10  287.68   15.21
   0  -5 -10  271.46   14.00
   0  -5 -11  239.22   11.96
   0   5  11  231.52   10.64
   0  -5 -12   38.73    3.52
   0   5  12   29.49    2.07
   0  -5 -13  187.23    8.52
   0   5  13  176.98    8.91
   0  -5 -13  171.73    9.95
   0   5  13  157.31   10.35
   0   5  13  181.70    8.50
   0   5  14    2.61    2.50
   0  -5 -14    2.85    2.43
   0   5  14    3.00    3.67
   0   5  14   -0.15    1.50
   0   5  15   25.73    3.20
   0  -5 -15   21.83    3.52
   0   5  15   24.85    4.51
   0   5  15   25.18    2.21
   0   5  16   18.77    2.93
   0  -5 -16    6.82    2.80
   0   5  16   10.05    3.90
   0   5  16   15.93    1.99
   0   5  17    4.44    2.45
   0  -5 -17    2.09    2.49
   0   5  17    4.14    3.36
   0   5  17    5.44    1.67
   0   5  18   17.39    2.46
   0   5  18   22.96    2.10
   0   5  19   14.79    1.72
   0  -5 -19   11.34    1.88
   0   5  20    3.59    1.22
   0  -5 -20    2.67    1.46
   0  -5 -21   14.29    1.54
   0  -5 -22    9.28    1.02
   0  -6  17    2.89    0.81
   0   6 -17    1.89    0.84
   0   6 -17    1.87    0.78
   0   6 -16   11.54    1.30
   0  -6  16    9.04    1.22
   0   6 -16   11.69    1.37
   0  -6  16   13.41    1.17
   0  -6  15   23.23    1.94
   0   6 -15   25.28    1.94
   0  -6  15   25.28    1.73
   0   6 -15   23.78    2.03
   0  -6  14    0.92    1.36
   0   6 -14    0.21    1.38
   0  -6  14    1.06    1.47
   0  -6  14    0.83    1.19
   0   6 -14    0.96    1.58
   0  -6  13    2.51    1.48
   0  -6  13    4.10    1.63
   0   6 -13    2.96    1.54
   0   6 -13    1.84    1.72
   0  -6  13    1.39    1.23
   0  -6  12    3.28    1.68
   0   6 -12    1.76    2.02
   0   6 -12    3.08    1.56
   0   6 -12    5.74    1.83
   0  -6  12    5.06    1.35
   0   6 -11   27.53    3.42
   0  -6  11   33.37    2.35
   0   6 -11   39.92    2.96
   0  -6  11   38.93    2.73
   0   6 -11   32.72    2.61
   0   6 -10   50.50    4.50
   0   6 -10   60.17    4.43
   0  -6  10   54.89    3.17
   0   6 -10   61.22    3.78
   0   6 -10   62.97    3.52
   0  -6  10   54.46    3.50
   0   6  -9    1.90    2.17
   0   6  -9    2.46    2.14
   0  -6   9    0.80    1.14
   0   6  -9   -1.64    1.89
   0  -6   9    1.03    1.49
   0   6  -8   47.54    3.21
   0   6  -8   47.32    4.03
   0  -6   8   46.70    2.63
   0   6  -7   -0.40    1.50
   0  -6   7    1.12    0.95
   0   6  -7   -0.61    2.50
   0  -6   6  220.55   10.13
   0  -6   6  218.85   11.61
   0   6  -6  247.50   11.76
   0  -6   5  252.80   11.75
   0  -6   5  244.82   11.18
   0  -6   5  254.01   11.90
   0  -6   5  239.82   12.47
   0   6  -5  261.57   12.84
   0  -6   4  697.91   31.23
   0  -6   4  779.70   31.89
   0  -6   4  661.79   31.90
   0  -6   4  785.51   32.56
   0   6  -4  630.58   32.44
   0  -6   3   46.04    3.15
   0   6  -3   51.27    4.59
   0  -6   2   23.36    2.41
   0  -6   2   26.84    2.71
   0  -6   2   18.08    0.99
   0   6  -2   19.47    3.72
   0  -6   1  150.18    7.76
   0  -6   1  151.19    7.87
   0  -6   1  162.41    7.95
   0  -6   0   42.11    3.02
   0  -6   0   40.34    3.03
   0  -6  -1  338.39   15.75
   0   6   2   29.68    2.41
   0  -6  -2   38.32    2.65
   0   6   3   50.47    3.11
   0  -6  -3   44.49    3.07
   0   6   4   11.26    1.99
   0  -6  -4    0.70    1.39
   0   6   5  643.78   29.21
   0   6   6  495.84   22.33
   0  -6  -6  472.64   22.05
   0   6   7    3.91    2.89
   0  -6  -7   -0.06    1.71
   0   6   8   16.61    3.38
   0  -6  -8   18.92    2.14
   0  -6  -9  145.22    7.53
   0   6   9  129.66    6.23
   0  -6  -9  145.12    6.96
   0   6   9  144.50    7.96
   0  -6 -10   12.77    2.37
   0  -6 -10   20.60    1.92
   0   6  10   15.19    1.32
   0  -6 -10   15.29    1.80
   0   6  10   15.96    3.51
   0  -6 -11   64.64    4.44
   0   6  11   58.12    5.14
   0   6  11   56.08    3.01
   0  -6 -12   95.13    4.67
   0  -6 -12   91.63    5.96
   0   6  12   87.47    5.05
   0   6  12   82.29    6.56
   0   6  12   91.94    4.53
   0   6  13   90.17    5.29
   0  -6 -13   98.35    6.35
   0  -6 -13   97.87    4.86
   0   6  13   92.21    4.74
   0   6  14   11.32    2.76
   0  -6 -14    9.04    2.72
   0  -6 -14   11.81    1.66
   0   6  14   10.29    1.59
   0   6  15    6.06    2.72
   0  -6 -15    4.92    2.68
   0   6  15    9.63    4.12
   0   6  15    4.92    1.58
   0   6  16   11.89    4.17
   0   6  16   16.84    1.97
   0   6  16   14.48    2.98
   0   6  17   -1.26    3.40
   0   6  17    2.82    2.51
   0   6  17   -1.12    1.54
   0   6  18   68.28    4.35
   0   6  18   74.07    4.01
   0   6  19   10.29    2.04
   0  -6 -19   13.77    2.01
   0   6  19   17.04    1.73
   0  -6 -20    0.65    1.50
   0   6  20    1.74    1.14
   0  -6 -21    1.37    1.25
   0  -6 -22    5.68    1.03
   0   7 -17   11.52    0.78
   0  -7  16   14.09    1.18
   0   7 -16   11.63    1.09
   0   7 -16   10.79    1.15
   0   7 -15   58.87    3.25
   0  -7  15   64.76    3.32
   0   7 -15   61.43    3.33
   0  -7  14    1.63    1.27
   0   7 -14    0.59    1.24
   0  -7  14    1.78    1.26
   0  -7  14    2.09    1.04
   0   7 -14    1.99    1.38
   0  -7  13    3.40    1.47
   0   7 -13    4.15    1.37
   0  -7  13    5.28    1.21
   0   7 -13    2.87    1.57
   0  -7  13    3.33    1.48
   0  -7  12   28.47    2.49
   0   7 -12   31.50    2.46
   0  -7  12   31.38    2.51
   0   7 -12   31.82    2.64
   0  -7  12   33.91    2.18
   0  -7  11    5.54    1.72
   0   7 -11    5.01    2.06
   0   7 -11    5.72    1.67
   0   7 -11    4.91    1.93
   0  -7  11    9.20    1.39
   0   7 -10   54.12    4.74
   0  -7  10   68.90    3.63
   0   7 -10   72.14    4.95
   0   7 -10   69.39    4.16
   0   7 -10   69.12    3.94
   0  -7  10   66.09    3.93
   0   7  -9   77.17    5.93
   0   7  -9  100.02    6.18
   0  -7   9   96.27    4.68
   0   7  -9   95.13    5.24
   0   7  -9   93.00    5.03
   0   7  -8   31.35    3.50
   0  -7   8   34.57    2.18
   0   7  -8   34.99    2.80
   0   7  -8   36.61    2.56
   0   7  -7   72.57    5.50
   0  -7   7   76.12    3.99
   0   7  -7   90.46    4.62
   0   7  -7   85.23    4.41
   0   7  -6   20.70    1.89
   0   7  -6   14.40    2.90
   0  -7   6   21.18    2.97
   0   7  -6   20.79    2.12
   0  -7   6   22.38    1.49
   0  -7   5    1.99    2.04
   0  -7   5    1.90    0.83
   0   7  -5    5.46    2.74
   0  -7   4   15.12    2.58
   0  -7   4   34.20    2.61
   0  -7   4   17.55    1.31
   0  -7   4   17.26    2.09
   0   7  -4   34.55    3.66
   0  -7   3   23.51    2.83
   0  -7   3   24.86    2.50
   0  -7   3   21.38    1.44
   0   7  -3   27.49    3.79
   0  -7   3   27.54    1.62
   0  -7   2   40.05    3.47
   0  -7   2   46.16    3.41
   0  -7   2   46.17    2.45
   0   7  -2   40.78    4.56
   0  -7   1  181.52    9.73
   0  -7   1  189.79    9.79
   0  -7   1  181.69    9.63
   0  -7   1  199.16    8.85
   0   7  -1  202.87   10.42
   0  -7   0   63.50    4.75
   0  -7   0   61.39    4.71
   0  -7   0   82.07    4.93
   0  -7   0   89.42    3.92
   0  -7  -1   59.15    3.88
   0  -7  -1   59.97    3.90
   0  -7  -1   52.42    3.81
   0  -7  -1   53.12    2.86
   0  -7  -2  557.65   25.57
   0  -7  -3  818.78   36.71
   0   7   3  805.67   36.44
   0  -7  -4   59.86    3.98
   0   7   4   65.93    4.15
   0  -7  -5   19.44    1.44
   0  -7  -5   18.55    2.32
   0   7   5   19.79    2.80
   0  -7  -5   19.36    2.50
   0  -7  -5   19.60    1.46
   0  -7  -6   -0.41    1.00
   0  -7  -6   -1.45    2.12
   0   7   6    0.22    2.57
   0  -7  -6   -0.04    1.00
   0   7   7  101.15    6.00
   0  -7  -7   90.79    5.49
   0  -7  -7   97.15    4.62
   0  -7  -8   28.10    2.66
   0   7   8   29.47    3.66
   0  -7  -8   29.11    1.79
   0  -7  -9  238.45   11.59
   0   7   9  271.18   11.56
   0   7   9  274.19   13.22
   0  -7  -9  254.60   12.39
   0  -7 -10   99.52    4.20
   0   7  10   97.53    6.20
   0  -7 -10   97.51    5.04
   0   7  10   82.51    4.12
   0  -7 -10   83.74    4.84
   0  -7 -10   76.99    4.06
   0  -7 -11   73.16    4.43
   0   7  11   78.40    5.92
   0  -7 -11   79.76    4.46
   0   7  11   75.57    3.77
   0  -7 -12  203.03    9.43
   0   7  12  195.89    9.25
   0   7  12  195.71   11.40
   0  -7 -12  207.77    9.56
   0  -7 -13   41.23    2.57
   0   7  13   30.20    2.24
   0   7  13   33.54    3.17
   0   7  13   39.23    4.90
   0  -7 -13   39.44    2.74
   0   7  14  328.48   15.59
   0   7  14  327.23   15.13
   0   7  14  310.70   17.49
   0  -7 -14  344.02   15.28
   0   7  15   19.23    3.16
   0   7  15   14.66    1.80
   0  -7 -15   20.48    2.06
   0   7  16   -0.44    3.87
   0   7  16    1.55    1.50
   0   7  16    3.10    2.69
   0   7  17   21.83    4.67
   0   7  17   30.15    3.09
   0   7  17   19.73    2.06
   0   7  18    7.88    2.39
   0   7  18    6.12    1.60
   0   7  19   14.83    2.18
   0   7  19   14.86    1.67
   0  -7 -19   15.68    1.99
   0  -7 -20   47.04    2.96
   0  -7 -21    1.74    1.28
   0  -7 -22    3.63    1.06
   0   8 -16    7.95    0.70
   0  -8  16    6.94    0.71
   0   8 -16    7.33    0.67
   0   8 -15    4.82    0.99
   0  -8  15    4.14    0.97
   0   8 -15    4.93    0.91
   0  -8  14    0.35    1.16
   0  -8  14    0.62    1.15
   0   8 -14   -0.20    1.15
   0   8 -14    0.52    1.02
   0  -8  13    1.26    1.33
   0   8 -13   -0.41    1.38
   0   8 -13   -0.19    1.22
   0  -8  13   -0.55    1.32
   0  -8  12   39.59    2.83
   0  -8  12   40.72    2.43
   0   8 -12   39.09    2.87
   0   8 -12   42.13    2.76
   0  -8  12   44.29    2.83
   0  -8  11   17.66    2.03
   0   8 -11   15.97    1.88
   0  -8  11   13.67    1.93
   0  -8  11   18.48    1.62
   0   8 -10  108.52    5.77
   0   8 -10  115.95    5.97
   0  -8  10  108.67    5.39
   0   8  -9  128.62    6.16
   0   8  -9  128.27    6.34
   0   8  -9  122.53    7.36
   0  -8   9  115.08    5.72
   0   8  -8    5.97    2.18
   0   8  -8    6.09    1.72
   0   8  -8    7.53    1.97
   0   8  -8    8.43    2.50
   0  -8   8    5.81    1.22
   0   8  -7   35.73    3.71
   0   8  -7   39.50    2.82
   0   8  -7   38.42    3.05
   0  -8   7   41.89    2.35
   0  -8   6   20.74    3.26
   0   8  -6   25.52    2.07
   0   8  -6   17.88    3.09
   0   8  -6   20.78    2.35
   0  -8   6   21.21    1.58
   0  -8   5    6.33    2.50
   0  -8   5    8.11    1.35
   0   8  -5    8.64    2.72
   0   8  -5    8.14    1.50
   0  -8   5    8.06    1.04
   0   8  -5    8.55    1.85
   0   8  -4  190.62    9.31
   0  -8   4  199.91    9.07
   0   8  -4  184.68    9.12
   0  -8   4  209.93   10.41
   0  -8   4  175.84    9.73
   0  -8   4  190.46    8.73
   0  -8   4  221.33    9.79
   0   8  -4  169.58   10.18
   0  -8   3   23.63    2.94
   0  -8   3   31.55    2.76
   0  -8   3   25.16    1.59
   0  -8   3   22.96    1.49
   0  -8   3   21.86    2.42
   0   8  -3   25.01    3.45
   0  -8   3   31.64    1.79
   0  -8   2   32.76    3.22
   0  -8   2   41.59    2.35
   0   8  -2   38.02    4.13
   0  -8   1   76.39    4.73
   0  -8   1   81.94    4.82
   0  -8   1   60.14    4.50
   0  -8   1   70.71    3.58
   0   8  -1   60.16    5.13
   0  -8   0    9.25    2.27
   0  -8   0   10.18    2.23
   0  -8   0   13.43    2.52
   0  -8   0   11.87    1.28
   0  -8  -1  102.36    6.80
   0  -8  -1  115.82    6.90
   0  -8  -1  125.13    7.05
   0  -8  -1  138.31    6.02
   0  -8  -2  363.60   17.06
   0  -8  -2  399.12   18.13
   0  -8  -2  382.75   18.06
   0  -8  -2  401.35   17.16
   0  -8  -3  187.43    8.69
   0  -8  -3  212.76    9.81
   0  -8  -3  180.73    9.68
   0  -8  -3  190.85    8.75
   0  -8  -4    6.82    2.00
   0  -8  -4    6.51    1.13
   0  -8  -5    3.45    1.90
   0  -8  -5    2.97    1.00
   0   8   5    2.06    2.39
   0  -8  -5    0.68    1.11
   0  -8  -6  216.94   10.25
   0   8   6  233.61   11.34
   0  -8  -6  228.52   11.29
   0  -8  -6  233.62   10.32
   0  -8  -7  197.76    9.05
   0   8   7  205.42   10.35
   0  -8  -7  179.54    9.97
   0  -8  -7  202.57    9.11
   0  -8  -8  703.09   33.21
   0   8   8  682.60   33.48
   0  -8  -8  745.39   32.35
   0   8   9   33.58    3.87
   0  -8  -9   33.73    3.01
   0  -8  -9   33.20    2.03
   0  -8 -10   13.97    1.37
   0  -8 -10   20.75    1.29
   0  -8 -10   21.00    2.24
   0  -8 -10   10.96    2.10
   0   8  10   13.99    3.39
   0  -8 -11   10.72    1.53
   0  -8 -11    9.13    1.01
   0  -8 -11    8.91    1.84
   0   8  11    8.14    3.41
   0  -8 -11   13.70    2.01
   0  -8 -12   91.30    4.56
   0   8  12   97.93    6.92
   0   8  12   82.02    4.24
   0  -8 -13  149.18    7.19
   0  -8 -13  151.93    7.32
   0   8  13  135.69    9.42
   0   8  13  143.95    6.94
   0  -8 -14   20.60    2.08
   0  -8 -14   17.07    2.30
   0   8  14   16.42    2.93
   0   8  14   16.83    4.45
   0   8  14   21.89    1.78
   0  -8 -15  110.86    5.53
   0  -8 -15  107.04    5.69
   0   8  15   99.76    6.10
   0   8  15   95.79    8.01
   0   8  15  103.59    5.28
   0   8  16   48.86    3.98
   0  -8 -16   49.98    3.57
   0  -8 -16   55.82    3.36
   0   8  16   49.67    3.08
   0   8  17    9.66    2.73
   0   8  17   10.25    1.61
   0   8  18   18.59    2.76
   0   8  19   17.34    2.29
   0   8  19   14.19    2.00
   0   8  20    2.65    1.54
   0   8  20    4.48    1.96
   0  -8 -21    9.55    1.02
   0  -8 -21    6.25    1.45
   0  -8 -22    2.14    0.98
   0  -8 -22    2.44    0.92
   0   9 -15    2.68    0.57
   0  -9  15    2.54    0.60
   0   9 -15    2.46    0.54
   0  -9  14    3.11    0.95
   0   9 -14    3.28    0.87
   0  -9  14    2.81    0.99
   0   9 -14    2.89    0.94
   0  -9  13   10.42    1.38
   0  -9  13    8.18    1.40
   0   9 -13    9.34    1.43
   0   9 -13   11.30    1.27
   0  -9  12    4.66    1.46
   0  -9  12    4.36    1.41
   0   9 -12    5.58    1.34
   0   9 -12    6.34    1.53
   0  -9  11    3.78    1.57
   0   9 -11    3.23    1.44
   0   9 -11    4.36    1.62
   0   9 -10   13.15    1.83
   0  -9  10   11.26    1.34
   0   9 -10   12.54    2.13
   0   9  -9   18.29    2.05
   0   9  -9   22.90    3.14
   0  -9   9   20.02    1.60
   0   9  -9   13.86    2.25
   0   9  -8  261.41   11.50
   0   9  -8  267.18   11.73
   0  -9   8  224.12   11.00
   0   9  -8  231.72   12.69
   0   9  -7    3.96    1.93
   0   9  -7   -0.54    1.50
   0  -9   7    0.46    1.03
   0   9  -7    2.38    2.01
   0  -9   6   88.08    4.69
   0   9  -6   89.47    4.81
   0   9  -6   99.39    5.10
   0   9  -6   70.09    5.53
   0  -9   6   74.54    6.11
   0  -9   6   85.37    4.23
   0  -9   5  264.93   11.93
   0   9  -5  252.09   12.00
   0   9  -5  247.23   12.19
   0   9  -5  227.53   12.96
   0  -9   5  257.31   11.52
   0  -9   5  253.36   13.45
   0  -9   4   80.25    5.41
   0   9  -4   68.96    3.99
   0  -9   4   75.29    3.92
   0   9  -4   71.55    4.23
   0   9  -4   66.39    5.15
   0  -9   4   71.25    3.46
   0  -9   3  171.15    9.32
   0   9  -3  171.35    8.10
   0  -9   3  163.07    7.98
   0   9  -3  173.21    8.31
   0   9  -3  134.87    9.09
   0  -9   3  174.18    7.86
   0  -9   3  155.49    8.88
   0  -9   3  157.02    7.60
   0  -9   3  177.22    7.72
   0  -9   3  188.26    8.87
   0  -9   2    2.28    2.15
   0  -9   2    0.34    1.10
   0   9  -2    3.29    2.76
   0  -9   2    0.21    1.10
   0   9  -2   -0.21    1.52
   0  -9   2    0.42    1.99
   0  -9   2    2.25    0.70
   0   9  -1    1.60    2.76
   0  -9   1    2.54    1.17
   0  -9   1    4.29    2.08
   0  -9   1    4.54    2.13
   0  -9   1    3.34    2.12
   0  -9   0    1.69    1.14
   0   9   0   -2.97    2.94
   0  -9   0    2.53    2.01
   0  -9   0    0.53    1.94
   0  -9   0    0.10    2.16
   0  -9  -1   61.76    3.20
   0  -9  -1   50.08    4.11
   0  -9  -1   61.46    4.40
   0  -9  -2  309.80   13.95
   0  -9  -2  311.85   15.04
   0  -9  -2  295.75   14.95
   0  -9  -3   63.00    3.68
   0  -9  -3   81.70    4.89
   0  -9  -3   79.50    3.60
   0  -9  -3   59.29    4.80
   0  -9  -4  304.98   13.92
   0  -9  -4  337.69   15.12
   0  -9  -4  304.80   13.82
   0  -9  -4  294.53   14.97
   0  -9  -5   50.80    2.82
   0  -9  -5   56.67    4.01
   0   9   5   62.13    3.97
   0  -9  -6   19.28    1.52
   0  -9  -6   17.14    2.60
   0   9   6   19.29    2.67
   0  -9  -7  131.06    5.62
   0  -9  -7  120.53    6.73
   0   9   7  118.98    6.80
   0  -9  -8   41.20    2.33
   0  -9  -8   33.53    2.16
   0   9   8   35.01    3.83
   0  -9  -9  191.52    9.03
   0  -9  -9  175.00    9.94
   0   9   9  184.47   10.50
   0  -9  -9  204.69    8.98
   0  -9 -10    0.40    1.05
   0  -9 -10    2.24    1.22
   0   9  10   -1.69    2.96
   0  -9 -10    2.33    1.95
   0  -9 -10    0.57    0.88
   0  -9 -10   -0.54    1.75
   0  -9 -11   84.35    4.04
   0  -9 -11   77.81    5.00
   0   9  11   79.21    6.18
   0  -9 -11   81.54    4.23
   0  -9 -11   77.55    4.94
   0  -9 -11   74.93    3.88
   0  -9 -12   41.30    3.65
   0   9  12   48.58    5.31
   0  -9 -12   54.69    3.16
   0  -9 -12   60.05    3.86
   0   9  13    6.70    4.01
   0  -9 -13    7.68    1.71
   0  -9 -13    7.10    1.79
   0   9  14   60.49    4.51
   0   9  14   61.96    6.35
   0  -9 -14   74.97    4.25
   0  -9 -14   71.75    4.05
   0   9  15   44.93    4.03
   0   9  15   52.77    6.00
   0  -9 -15   48.23    3.39
   0  -9 -15   50.43    3.29
   0   9  16    4.38    2.75
   0   9  16    2.85    4.08
   0  -9 -16    5.16    2.09
   0  -9 -16    4.97    1.78
   0  -9 -17   17.32    2.42
   0   9  17   14.53    2.88
   0  -9 -18    8.94    2.10
   0  -9 -18    7.41    1.68
   0   9  18    7.00    2.56
   0   9  19   22.19    2.45
   0  -9 -19   21.38    2.32
   0  -9 -19   19.28    2.02
   0   9  19   17.90    2.26
   0  -9 -20    8.19    1.67
   0  -9 -20    5.55    1.54
   0  -9 -20    9.27    1.10
   0   9  20    5.77    1.66
   0  -9 -21   -0.52    1.24
   0  -9 -21    1.19    0.80
   0  -9 -21    1.54    1.22
   0  -9 -22   14.44    1.25
   0 -10  14   25.61    1.43
   0  10 -14   25.92    1.40
   0  10 -14   24.54    1.36
   0  10 -13    0.92    0.76
   0  10 -13    1.41    0.85
   0 -10  13    0.91    0.89
   0 -10  13    1.12    0.97
   0 -10  13    0.53    0.64
   0 -10  12    0.59    1.14
   0  10 -12    1.69    1.02
   0 -10  12    1.69    1.22
   0  10 -12    2.10    1.19
   0  10 -11   16.19    1.65
   0  10 -11   18.39    1.84
   0  10 -10   13.64    1.70
   0  10 -10   19.65    2.04
   0  10  -9   63.81    3.62
   0  10  -9   65.30    3.87
   0 -10   9   54.28    3.70
   0 -10   8    0.99    0.97
   0  10  -8    1.98    2.27
   0  10  -8    0.42    1.51
   0  10  -8    1.78    1.98
   0 -10   8    0.77    1.69
   0  10  -7    2.67    2.09
   0  10  -7    0.77    1.65
   0 -10   7    1.04    1.58
   0 -10   7    2.13    1.02
   0  10  -7    0.92    2.36
   0  10  -6    6.56    2.16
   0  10  -6    7.69    1.83
   0 -10   6    6.70    1.78
   0 -10   6    8.57    1.13
   0  10  -5   18.95    2.12
   0 -10   5   20.58    2.07
   0 -10   5   21.81    1.48
   0  10  -5   16.34    2.43
   0 -10   4   21.87    2.10
   0  10  -4   22.76    2.18
   0 -10   4   26.43    1.52
   0 -10   4   27.72    3.60
   0  10  -4   18.48    2.56
   0  10  -3   29.20    2.68
   0 -10   3   24.82    1.93
   0  10  -3   23.49    2.27
   0 -10   3   23.92    3.07
   0 -10   3   30.07    2.06
   0  10  -3   24.20    3.27
   0 -10   3   26.17    1.62
   0 -10   3   30.35    1.85
   0 -10   3   31.58    3.11
   0 -10   3   32.81    3.67
   0 -10   2    0.14    2.24
   0  10  -2    0.05    1.32
   0  10  -2   -0.12    1.77
   0 -10   2   -0.69    1.30
   0  10  -2    2.61    2.59
   0 -10   2    1.52    1.03
   0 -10   2    1.59    1.96
   0 -10   2    0.61    2.18
   0 -10   1   31.40    3.32
   0  10  -1   28.91    2.16
   0 -10   1   27.39    2.04
   0  10  -1   23.60    3.50
   0  10  -1   28.16    2.45
   0 -10   1   29.27    2.94
   0 -10   1   25.93    1.77
   0 -10   1   19.15    3.12
   0 -10   0   82.67    4.14
   0  10   0   72.51    5.62
   0 -10   0   75.73    5.26
   0 -10   0   67.60    5.27
   0 -10   0   70.17    5.34
   0 -10  -1  444.85   19.81
   0 -10  -1  419.96   20.97
   0 -10  -1  438.22   21.08
   0 -10  -2   -0.25    1.20
   0 -10  -2   -1.46    2.22
   0 -10  -2    0.58    1.91
   0 -10  -3    1.53    1.18
   0 -10  -3    0.89    2.12
   0 -10  -3    1.26    1.94
   0 -10  -4   35.58    2.28
   0 -10  -4   34.31    3.57
   0 -10  -4   34.27    3.29
   0 -10  -4   31.34    1.98
   0 -10  -5   38.94    3.36
   0 -10  -5   34.69    2.15
   0 -10  -6    0.47    1.16
   0  10   6    1.02    2.09
   0 -10  -6    0.27    0.93
   0 -10  -7  253.77   11.41
   0 -10  -7  248.32   11.28
   0 -10  -7  240.74   12.58
   0  10   7  230.17   12.40
   0 -10  -8   21.11    1.74
   0 -10  -8   18.70    2.80
   0  10   8   15.94    3.07
   0 -10  -8   26.02    1.68
   0 -10  -8   20.84    1.76
   0 -10  -9   14.49    1.61
   0  10   9   12.48    3.10
   0 -10  -9   14.26    2.62
   0 -10  -9   16.38    1.41
   0 -10  -9   17.18    1.65
   0 -10 -10   24.56    2.07
   0 -10 -10   23.41    3.02
   0  10  10   26.24    3.89
   0 -10 -10   27.94    2.04
   0 -10 -10   25.61    1.80
   0 -10 -10   32.97    3.10
   0 -10 -10   30.44    1.92
   0 -10 -11   20.40    1.68
   0 -10 -11   22.69    1.98
   0  10  11   15.32    3.86
   0 -10 -11   17.82    2.65
   0 -10 -11   22.17    1.79
   0 -10 -11   19.64    1.54
   0 -10 -11   21.74    2.72
   0 -10 -11   19.77    2.15
   0 -10 -12   12.31    1.92
   0 -10 -12   17.78    1.55
   0 -10 -12   12.79    1.55
   0 -10 -12    7.42    2.22
   0  10  12   11.32    4.04
   0 -10 -12   20.65    2.62
   0 -10 -12   19.08    1.42
   0 -10 -13    1.70    1.62
   0 -10 -13    1.54    1.13
   0  10  13    2.45    3.80
   0  10  14   19.28    4.57
   0 -10 -14   22.44    2.47
   0 -10 -14   22.40    2.35
   0  10  15   13.64    3.05
   0  10  15   13.09    4.52
   0 -10 -15   16.56    2.17
   0 -10 -15   14.85    2.24
   0  10  16    8.56    2.87
   0  10  16   12.57    4.51
   0 -10 -16   11.42    2.28
   0 -10 -16   10.10    2.03
   0 -10 -17   42.17    2.84
   0 -10 -17   35.23    2.99
   0 -10 -17   36.63    2.65
   0 -10 -17   40.58    2.45
   0  10  17   31.45    3.43
   0 -10 -18   17.04    2.23
   0 -10 -18   12.75    1.80
   0 -10 -18   12.27    1.46
   0  10  18   13.69    2.72
   0 -10 -19   48.91    3.33
   0  10  19   49.18    3.49
   0 -10 -19   50.76    3.18
   0  10  20   35.42    2.89
   0 -10 -20   45.73    2.93
   0 -10 -20   45.56    2.79
   0  10  20   43.37    2.94
   0  10  21    5.81    1.52
   0 -10 -21    2.84    1.24
   0 -10 -21    5.26    1.23
   0 -10 -22    5.10    0.88
   0 -10 -22    4.80    0.91
   0 -11  13    0.40    0.53
   0 -11  13   -0.10    0.58
   0  11 -13    0.47    0.49
   0 -11  12    2.98    0.89
   0  11 -12    0.87    0.86
   0  11 -12    1.07    0.71
   0 -11  11    0.21    1.10
   0  11 -11    4.38    1.02
   0  11 -11    2.89    1.15
   0 -11  11    0.79    0.77
   0  11 -10   47.37    2.83
   0 -11  10   47.07    3.03
   0  11 -10   52.90    3.02
   0  11  -9   23.27    1.90
   0 -11   9   20.33    2.12
   0  11  -9   22.86    2.21
   0  11  -8    8.11    1.63
   0 -11   8    7.09    1.78
   0  11  -8   11.64    2.05
   0  11  -7    1.79    1.47
   0  11  -7    2.85    1.97
   0 -11   7    2.38    1.67
   0  11  -6    5.20    2.55
   0  11  -6    2.32    2.00
   0 -11   6    1.67    1.59
   0  11  -6    0.28    1.60
   0 -11   5    3.79    1.59
   0 -11   5    4.38    1.05
   0  11  -5    4.52    1.70
   0 -11   5    8.44    3.04
   0  11  -5    4.68    2.06
   0  11  -4    6.54    1.67
   0 -11   4    7.14    1.18
   0  11  -4    8.98    2.25
   0 -11   4    5.14    2.99
   0 -11   3   14.19    1.53
   0  11  -3   12.57    1.85
   0 -11   3   12.71    1.40
   0 -11   3   10.89    1.65
   0 -11   3   14.87    3.35
   0  11  -3   11.14    2.35
   0  11  -2   25.14    2.75
   0 -11   2   22.05    1.92
   0  11  -2   25.51    2.30
   0 -11   2   25.79    1.85
   0 -11   2   34.02    3.33
   0 -11   2   31.92    1.92
   0 -11   2   21.22    2.12
   0 -11   2   32.07    3.69
   0 -11   2   18.12    3.14
   0 -11   1    2.76    2.53
   0  11  -1    0.19    1.83
   0 -11   1    2.32    1.19
   0 -11   1    2.28    1.10
   0  11  -1    0.87    1.38
   0 -11   1    0.24    1.15
   0 -11   1    1.44    1.43
   0 -11   1    3.60    1.18
   0 -11   1    3.72    2.23
   0 -11   1    4.75    2.71
   0 -11   0    5.04    2.64
   0  11   0    4.62    1.81
   0 -11   0    5.50    1.20
   0 -11   0    5.50    1.13
   0  11   0    5.19    1.48
   0 -11   0    4.72    1.22
   0 -11   0    1.92    1.49
   0  11   0    5.47    2.80
   0 -11   0    5.54    2.16
   0 -11   0    4.89    1.12
   0 -11   0    8.02    2.62
   0 -11  -1    5.34    2.47
   0 -11  -1    2.35    1.11
   0  11   1    1.23    1.19
   0 -11  -1    1.67    1.12
   0 -11  -1    1.47    1.42
   0  11   1   -0.13    2.56
   0  11   1    0.50    1.56
   0 -11  -1    1.61    2.51
   0 -11  -2   15.36    2.85
   0  11   2   16.21    1.65
   0 -11  -2   17.36    1.57
   0 -11  -2   18.92    1.61
   0 -11  -2   20.08    1.83
   0  11   2   19.51    2.02
   0 -11  -2   20.70    3.07
   0 -11  -3    1.71    2.10
   0 -11  -3    1.64    1.35
   0 -11  -3    1.61    1.05
   0  11   3    1.95    1.40
   0 -11  -3    0.91    2.40
   0 -11  -4   13.93    1.64
   0 -11  -4   12.63    1.41
   0  11   4   12.01    1.69
   0 -11  -4   14.85    2.88
   0 -11  -5    4.01    1.09
   0 -11  -5    3.27    2.04
   0 -11  -5    1.56    1.32
   0  11   5    2.25    1.31
   0 -11  -5    1.56    2.32
   0 -11  -5    1.90    1.07
   0 -11  -6   12.01    1.37
   0  11   6   11.79    1.58
   0 -11  -7   14.72    1.54
   0 -11  -7   12.08    2.82
   0  11   7   12.03    2.57
   0 -11  -7   17.70    1.48
   0 -11  -7   14.14    1.75
   0  11   8   20.16    3.15
   0 -11  -8   16.68    2.91
   0 -11  -8   20.06    1.58
   0 -11  -8   20.29    1.83
   0 -11  -9  245.44   11.93
   0 -11  -9  270.85   11.97
   0  11   9  224.00   13.20
   0 -11  -9  238.44   13.21
   0 -11  -9  270.73   11.83
   0 -11 -10    1.71    1.42
   0 -11 -10    1.63    1.10
   0 -11 -10    2.12    2.22
   0 -11 -10    1.73    1.43
   0  11  10    5.51    3.22
   0 -11 -10    2.92    2.40
   0 -11 -10    2.01    1.15
   0 -11 -11   57.66    2.90
   0 -11 -11   44.06    2.84
   0 -11 -11   48.77    3.08
   0 -11 -11   44.04    3.22
   0 -11 -11   48.27    3.01
   0 -11 -11   56.99    2.87
   0 -11 -11   55.79    4.27
   0  11  11   47.20    5.04
   0 -11 -11   37.58    3.92
   0 -11 -12    1.83    1.12
   0 -11 -12    2.33    1.14
   0 -11 -12   -0.18    1.71
   0 -11 -12    0.95    1.77
   0 -11 -12    2.67    1.35
   0 -11 -12    1.04    2.24
   0  11  12    3.24    3.64
   0 -11 -12    2.38    1.14
   0 -11 -12    1.17    2.07
   0 -11 -13   14.98    1.57
   0 -11 -13   10.72    1.99
   0 -11 -13   12.60    1.35
   0  11  13   15.50    1.82
   0  11  13   15.44    4.23
   0 -11 -13   12.43    2.97
   0 -11 -13   11.13    1.47
   0 -11 -14   66.74    3.76
   0 -11 -14   68.20    4.05
   0  11  14   58.79    6.36
   0 -11 -14   65.46    4.20
   0 -11 -14   73.04    5.53
   0 -11 -14   75.55    3.78
   0 -11 -15   88.81    4.77
   0 -11 -15   96.12    5.08
   0  11  15   89.83    5.50
   0 -11 -15   96.71    4.73
   0 -11 -15   98.86    6.59
   0 -11 -15   89.82    5.15
   0  11  16    3.86    2.81
   0 -11 -16    3.30    1.18
   0 -11 -16    2.88    1.44
   0 -11 -16    2.60    2.05
   0 -11 -16    4.97    1.82
   0  11  17    1.25    2.70
   0 -11 -17    1.30    1.06
   0 -11 -17    3.03    1.94
   0 -11 -17    0.85    1.37
   0 -11 -17    3.43    1.81
   0 -11 -18   21.83    2.27
   0 -11 -18   17.16    1.55
   0 -11 -18   20.20    1.89
   0  11  19    6.40    2.06
   0 -11 -19    1.71    1.32
   0 -11 -19    3.92    1.67
   0 -11 -19    2.75    1.00
   0  11  20   14.66    1.88
   0 -11 -20   16.61    1.73
   0  11  20   14.12    1.75
   0 -11 -20   14.27    1.51
   0 -11 -20   12.11    1.20
   0  11  21   40.02    2.51
   0 -11 -21   45.51    2.27
   0 -11 -22    1.60    0.66
   0 -12  11   15.36    1.16
   0  12 -11   13.58    1.11
   0 -12  11   14.10    1.31
   0  12 -11   11.15    1.00
   0 -12  10   52.62    2.69
   0 -12  10   43.25    2.72
   0  12 -10   48.09    2.57
   0  12 -10   44.54    2.65
   0 -12   9    8.50    1.09
   0 -12   9   10.80    1.57
   0  12  -9    9.53    1.27
   0  12  -9   12.30    1.56
   0 -12   8    4.14    1.13
   0 -12   8    7.16    1.65
   0  12  -8    8.47    1.35
   0  12  -8    6.96    1.70
   0 -12   7    0.47    1.13
   0 -12   7    1.51    1.64
   0  12  -7    0.83    1.36
   0  12  -7    1.53    1.75
   0 -12   6   13.35    1.59
   0 -12   6   13.70    1.90
   0  12  -6   16.72    2.26
   0  12  -6   13.90    1.79
   0  12  -5   17.04    2.04
   0 -12   5   15.64    2.02
   0 -12   5   16.07    1.72
   0  12  -5   19.57    3.26
   0  12  -5   19.94    2.42
   0 -12   4   79.34    4.32
   0 -12   4   78.34    4.16
   0 -12   4   72.17    3.89
   0  12  -4   79.81    4.44
   0  12  -4   79.88    4.74
   0 -12   4   75.61    6.10
   0 -12   3  162.86    8.11
   0 -12   3  163.91    7.97
   0  12  -3  166.95    8.28
   0 -12   3  168.42    7.88
   0 -12   3  166.40    8.04
   0 -12   3  192.58   10.25
   0  12  -3  168.19    8.58
   0 -12   2  134.72    9.04
   0  12  -2  157.93    8.26
   0 -12   2  166.08    7.73
   0 -12   2  159.20    7.78
   0 -12   2  157.56    7.60
   0  12  -2  152.11    7.95
   0 -12   2  159.71    7.74
   0 -12   2  159.20    7.80
   0 -12   2  170.01    7.61
   0 -12   2  179.90    9.88
   0 -12   1   50.99    5.03
   0  12  -1   73.39    4.44
   0 -12   1   62.53    3.80
   0 -12   1   65.90    3.82
   0  12  -1   68.29    4.07
   0 -12   1   71.17    3.68
   0 -12   1   71.90    3.83
   0 -12   1   61.99    3.87
   0 -12   1   86.02    5.37
   0 -12   1   76.70    3.73
   0 -12   1   88.26    5.89
   0  12   0   84.30    4.52
   0 -12   0   68.62    3.89
   0 -12   0   70.10    3.95
   0 -12   0   71.44    3.83
   0  12   0   70.31    4.13
   0 -12   0   76.41    3.95
   0 -12   0   80.58    4.14
   0 -12   0   69.33    3.83
   0 -12   0   67.01    5.21
   0 -12   0   67.47    5.36
   0  12   1   42.20    3.11
   0 -12  -1   50.18    4.54
   0  12   1   41.07    2.74
   0 -12  -1   41.17    2.53
   0 -12  -1   41.85    2.62
   0 -12  -1   38.91    2.83
   0 -12  -1   43.37    2.58
   0 -12  -1   49.66    4.06
   0 -12  -1   33.89    4.12
   0  12   2   47.25    3.22
   0 -12  -2   56.34    4.71
   0 -12  -2   43.67    2.69
   0  12   2   43.09    2.84
   0 -12  -2   44.63    2.74
   0 -12  -2   43.97    3.04
   0 -12  -2   51.27    4.21
   0 -12  -2   47.86    2.71
   0 -12  -2   36.07    4.24
   0 -12  -3  256.40   12.91
   0 -12  -3  235.22   11.11
   0 -12  -3  239.99   11.11
   0 -12  -3  243.16   11.25
   0  12   3  242.88   11.45
   0 -12  -3  221.76   12.67
   0 -12  -4   29.78    3.53
   0 -12  -4   28.37    2.08
   0 -12  -4   28.19    2.04
   0 -12  -4   30.59    2.39
   0  12   4   29.26    2.48
   0 -12  -4   26.52    3.60
   0 -12  -5   84.22    5.56
   0 -12  -5   80.64    5.54
   0 -12  -5   70.79    3.75
   0 -12  -5   69.20    3.71
   0 -12  -5   69.54    3.97
   0  12   5   66.70    4.02
   0 -12  -5   54.07    5.22
   0 -12  -6    6.65    1.35
   0 -12  -6    5.93    1.26
   0 -12  -6    2.42    2.25
   0  12   6    7.63    1.56
   0 -12  -6    8.31    1.58
   0 -12  -7   69.67    3.87
   0 -12  -7   68.20    3.74
   0 -12  -7   68.67    3.56
   0 -12  -8   14.49    3.12
   0 -12  -8    9.72    1.58
   0 -12  -8   11.11    1.82
   0 -12  -8    8.56    1.28
   0 -12  -8    9.52    1.41
   0 -12  -8    6.01    2.50
   0 -12  -9    9.42    1.69
   0 -12  -9   10.06    1.42
   0 -12  -9   12.90    2.77
   0 -12  -9   10.86    1.84
   0 -12  -9    8.77    1.32
   0 -12  -9    8.71    2.99
   0  12   9   12.53    3.06
   0 -12 -10   15.98    1.85
   0 -12 -10   18.73    1.99
   0 -12 -10   25.94    3.21
   0 -12 -10   23.27    1.79
   0 -12 -10   17.29    1.96
   0 -12 -10   19.22    1.70
   0  12  10   19.36    3.54
   0 -12 -10   15.40    3.12
   0 -12 -11   77.64    4.32
   0 -12 -11   81.79    4.46
   0 -12 -11   89.17    5.77
   0 -12 -11   89.22    4.25
   0 -12 -11   74.49    4.38
   0  12  11   71.51    6.24
   0 -12 -11   76.26    5.81
   0 -12 -11   85.16    4.26
   0 -12 -12   64.01    3.51
   0 -12 -12   60.93    3.60
   0 -12 -12   65.74    3.93
   0 -12 -12   67.59    3.96
   0 -12 -12   63.48    3.66
   0 -12 -12   69.79    3.53
   0 -12 -12   75.87    5.17
   0  12  12   52.39    5.66
   0 -12 -12   60.05    5.02
   0 -12 -13    2.47    1.82
   0 -12 -13    3.97    1.19
   0 -12 -13    2.67    1.34
   0  12  13    3.58    1.70
   0 -12 -13    1.95    1.30
   0 -12 -13    2.44    2.68
   0  12  13    2.26    3.57
   0 -12 -14  105.49    5.58
   0 -12 -14  118.19    6.00
   0 -12 -14  118.66    5.67
   0 -12 -14  128.70    7.69
   0 -12 -14  120.42    6.04
   0 -12 -15   29.76    2.30
   0 -12 -15   34.24    2.80
   0  12  15   26.51    4.81
   0 -12 -15   36.32    2.94
   0 -12 -15   37.73    4.18
   0 -12 -15   40.85    2.35
   0  12  16    0.35    2.56
   0 -12 -16   -0.89    1.17
   0 -12 -16    3.34    1.78
   0 -12 -16    1.00    1.82
   0  12  17    6.83    2.74
   0 -12 -17    5.16    1.22
   0 -12 -17    7.74    1.81
   0 -12 -17    7.17    1.91
   0  12  18   31.34    3.06
   0 -12 -18   31.24    2.03
   0 -12 -18   32.24    2.59
   0  12  19  100.83    5.84
   0 -12 -19  115.99    5.72
   0 -12 -19  118.50    5.44
   0  12  20   10.06    1.69
   0 -12 -20   12.98    1.09
   0 -12 -20   11.58    1.51
   0 -12 -20   11.35    1.32
   0  12  20   12.34    1.85
   0 -12 -21    4.01    1.00
   0  12  21    5.84    1.37
   0  12  21    4.21    1.06
   0 -13  10   16.35    1.13
   0  13 -10   12.75    0.90
   0  13 -10   14.34    1.07
   0 -13  10   15.91    1.25
   0 -13   9    9.48    1.18
   0  13  -9    9.37    0.96
   0  13  -9    9.16    1.15
   0 -13   9    8.16    1.27
   0 -13   8   -0.16    1.16
   0 -13   8    2.31    1.26
   0  13  -8   -0.75    1.23
   0  13  -8    0.49    0.92
   0  13  -7   -0.53    1.45
   0 -13   7   -0.65    1.22
   0  13  -7    0.22    1.08
   0 -13   7    1.98    1.43
   0  13  -6   13.80    1.61
   0  13  -6   13.62    1.94
   0 -13   6   10.97    1.70
   0 -13   6   11.48    1.34
   0  13  -5    2.40    1.38
   0  13  -5    3.95    1.92
   0 -13   5    1.29    1.45
   0 -13   5    3.86    1.18
   0  13  -4   33.78    2.52
   0 -13   4   36.64    2.33
   0  13  -4   34.34    2.89
   0 -13   4   33.28    2.52
   0 -13   3   38.06    2.55
   0  13  -3   31.21    2.52
   0 -13   3   32.52    2.14
   0 -13   3   35.05    2.34
   0  13  -3   34.42    3.87
   0 -13   3   32.37    4.28
   0  13  -3   36.60    3.11
   0  13  -2    5.92    2.20
   0 -13   2    5.78    1.50
   0  13  -2    5.72    1.61
   0 -13   2    4.22    1.20
   0 -13   2    5.82    1.45
   0 -13   2    4.74    1.31
   0 -13   2    7.84    1.36
   0 -13   2    8.11    3.21
   0 -13   2    3.86    1.60
   0  13  -2    6.36    1.84
   0 -13   1    6.22    1.74
   0  13  -1    4.11    2.17
   0 -13   1    6.16    1.45
   0 -13   1    5.14    1.27
   0  13  -1    4.19    1.58
   0 -13   1    3.74    1.57
   0 -13   1    5.01    1.33
   0 -13   1    6.20    2.85
   0 -13   1    3.11    2.48
   0 -13   1    3.97    1.40
   0  13  -1    3.95    2.92
   0 -13   1    6.69    3.31
   0  13   0   12.48    2.32
   0 -13   0   10.67    1.54
   0  13   0   10.80    1.81
   0 -13   0   11.58    1.47
   0 -13   0    8.13    1.66
   0 -13   0    9.72    1.43
   0 -13   0    6.34    2.82
   0 -13   0   14.43    3.04
   0 -13   0   13.09    1.59
   0 -13   0    7.92    1.94
   0  13   1   11.96    1.66
   0 -13  -1   11.73    1.53
   0 -13  -1    9.23    1.74
   0 -13  -1   18.22    3.19
   0 -13  -1   14.44    1.65
   0 -13  -1   10.47    3.14
   0  13   1   10.88    2.30
   0 -13  -1    9.65    1.99
   0 -13  -2   42.54    4.35
   0 -13  -2   29.14    2.13
   0  13   2   25.83    2.24
   0 -13  -2   31.79    2.21
   0 -13  -2   38.83    3.97
   0 -13  -2   22.59    3.72
   0  13   2   30.58    2.85
   0 -13  -2   21.77    2.50
   0 -13  -3   58.85    4.86
   0 -13  -3   49.20    2.89
   0 -13  -3   45.07    2.87
   0 -13  -3   47.50    4.42
   0 -13  -3   46.48    4.59
   0  13   3   49.01    3.46
   0 -13  -3   49.57    3.27
   0 -13  -4   91.41    6.55
   0 -13  -4   93.44    4.76
   0 -13  -4   93.07    6.29
   0 -13  -4   91.77    4.73
   0 -13  -4   79.85    6.43
   0  13   4   93.73    5.13
   0 -13  -4   95.33    5.06
   0 -13  -5    7.27    2.86
   0 -13  -5    6.72    2.98
   0 -13  -5    9.53    1.59
   0 -13  -5    8.12    1.49
   0 -13  -5    9.21    2.81
   0 -13  -5    8.07    3.22
   0  13   5   12.20    1.94
   0 -13  -5    8.37    2.03
   0 -13  -6  160.29    7.80
   0 -13  -6  157.42    7.83
   0 -13  -6  164.12    7.72
   0 -13  -6  169.58    9.39
   0 -13  -6  165.71    9.64
   0  13   6  160.51    8.01
   0 -13  -7    5.90    2.69
   0 -13  -7    7.87    1.63
   0 -13  -7    7.48    1.56
   0 -13  -8  253.28   11.62
   0 -13  -8  209.16   13.23
   0 -13  -8  279.05   11.72
   0 -13  -8  283.67   13.48
   0 -13  -8  244.09   11.88
   0 -13  -8  235.75   11.69
   0 -13  -9   19.66    1.75
   0 -13  -9   16.11    1.99
   0 -13  -9   21.54    3.68
   0 -13  -9   20.92    1.83
   0 -13  -9   23.10    3.30
   0 -13  -9   15.95    2.21
   0 -13 -10   97.18    4.71
   0 -13 -10   88.55    4.89
   0 -13 -10   87.94    4.83
   0 -13 -10   82.89    6.32
   0 -13 -10   98.55    6.37
   0 -13 -10   95.93    4.74
   0 -13 -10   89.69    4.96
   0 -13 -11    9.14    1.76
   0 -13 -11    8.30    1.86
   0 -13 -11    6.26    1.57
   0 -13 -11    5.46    2.71
   0 -13 -11   10.24    1.53
   0 -13 -11    9.05    2.79
   0 -13 -11   11.11    1.46
   0 -13 -12   51.28    3.47
   0 -13 -12   55.75    3.03
   0 -13 -12   61.53    5.05
   0 -13 -12   54.12    3.19
   0 -13 -12   47.87    3.38
   0 -13 -12   61.78    3.12
   0 -13 -12   62.73    4.80
   0  13  12   55.12    5.32
   0 -13 -12   46.78    3.24
   0  13  12   50.06    3.67
   0 -13 -12   42.19    4.50
   0  13  12   40.86    4.99
   0 -13 -13    1.92    1.26
   0 -13 -13    2.14    2.68
   0 -13 -13    0.62    1.83
   0  13  13    0.80    3.36
   0  13  13    3.16    1.94
   0 -13 -13    3.12    1.40
   0 -13 -13    2.38    1.86
   0 -13 -13    2.34    1.19
   0 -13 -14    1.56    1.90
   0 -13 -14   -0.33    2.60
   0 -13 -14   -0.07    1.10
   0 -13 -15   26.80    2.60
   0 -13 -15   28.36    2.01
   0 -13 -15   27.54    2.55
   0  13  16    6.08    2.80
   0 -13 -16    9.94    1.32
   0 -13 -16    4.96    1.91
   0 -13 -16    7.57    1.89
   0  13  17   11.94    2.72
   0 -13 -17   10.61    1.31
   0 -13 -17   13.89    1.96
   0 -13 -17   16.12    1.99
   0 -13 -18   44.92    2.86
   0 -13 -18   43.98    2.44
   0  13  18   39.10    3.23
   0 -13 -19   14.70    1.66
   0  13  19   10.55    2.10
   0 -13 -19    8.79    1.49
   0 -13 -19   18.26    1.24
   0 -13 -20   59.54    3.00
   0  13  20   50.85    3.08
   0  13  20   54.61    3.28
   0 -13 -21   19.95    1.35
   0  13  21   18.94    1.48
   0 -14   9   23.70    1.40
   0  14  -9   20.96    1.25
   0  14  -8    0.34    0.55
   0 -14   8    0.52    0.72
   0  14  -8    0.66    0.82
   0 -14   8   -0.28    0.97
   0 -14   7    1.51    1.08
   0 -14   7    2.79    1.09
   0  14  -7    2.70    1.12
   0  14  -7    2.10    0.82
   0 -14   7    2.14    1.02
   0  14  -6    0.34    0.93
   0  14  -6    2.54    1.39
   0 -14   6    2.15    1.22
   0 -14   6    2.71    1.28
   0  14  -5   21.47    1.74
   0  14  -5   20.49    2.06
   0 -14   5   19.97    1.87
   0  14  -4   20.98    1.84
   0  14  -4   22.59    2.27
   0 -14   4   19.10    1.92
   0  14  -3  125.48    6.29
   0  14  -3  122.33    6.57
   0 -14   3  127.09    6.26
   0  14  -2    1.80    1.38
   0 -14   2    0.82    1.30
   0  14  -2    1.31    1.98
   0  14  -1   15.55    1.89
   0 -14   1   16.25    1.57
   0 -14   1   23.41    1.75
   0 -14   1   16.39    2.01
   0  14  -1   15.02    2.12
   0 -14   1   15.98    1.74
   0 -14   1   17.66    1.90
   0  14  -1   15.67    2.43
   0 -14   0    2.68    1.27
   0 -14   0    4.04    1.22
   0 -14   0    3.40    1.67
   0  14   0    4.67    1.50
   0 -14   0    3.71    2.61
   0  14   0    6.15    3.02
   0 -14   0    4.39    1.39
   0 -14   0    4.10    1.79
   0  14   0    2.34    2.02
   0 -14   0    3.25    2.74
   0  14   0    3.25    1.99
   0 -14  -1   49.04    3.20
   0  14   1   49.36    3.11
   0 -14  -1   47.52    2.90
   0 -14  -1   53.33    2.99
   0 -14  -1   45.17    4.40
   0 -14  -1   48.44    3.33
   0 -14  -1   45.92    4.74
   0  14   1   49.19    3.63
   0 -14  -2   64.24    3.78
   0 -14  -2   62.79    3.50
   0 -14  -2   66.44    3.56
   0 -14  -2   65.31    5.27
   0 -14  -2   60.71    3.88
   0  14   2   60.92    4.14
   0 -14  -2   50.89    5.28
   0 -14  -3    3.07    3.05
   0 -14  -3    3.60    1.39
   0 -14  -3    0.19    1.58
   0 -14  -3    2.06    2.77
   0 -14  -3    2.25    1.46
   0 -14  -3    1.42    1.80
   0  14   3    2.30    2.03
   0 -14  -3    1.09    2.64
   0 -14  -4   16.48    3.45
   0 -14  -4   12.85    3.30
   0 -14  -4    9.75    1.62
   0 -14  -4   11.62    3.00
   0 -14  -4    9.10    1.64
   0 -14  -4   11.36    2.13
   0  14   4   13.39    2.22
   0 -14  -4    9.29    3.09
   0 -14  -5   13.38    3.11
   0 -14  -5   15.05    3.54
   0 -14  -5    5.75    1.79
   0 -14  -5    7.46    1.51
   0 -14  -5    9.73    3.03
   0 -14  -5    9.05    1.62
   0 -14  -5    4.75    2.10
   0 -14  -5    1.46    2.84
   0  14   5    7.83    2.02
   0 -14  -6    1.09    2.88
   0 -14  -6    0.05    1.74
   0 -14  -6    1.75    1.48
   0 -14  -6    1.27    1.61
   0 -14  -6    1.89    2.07
   0 -14  -6    3.81    2.90
   0 -14  -6    2.30    1.38
   0 -14  -6    3.67    2.66
   0 -14  -7   62.16    3.54
   0 -14  -7   58.43    3.48
   0 -14  -7   54.81    3.63
   0 -14  -7   64.72    5.34
   0 -14  -8    3.42    2.92
   0 -14  -8   -0.05    1.68
   0 -14  -8    0.40    1.50
   0 -14  -8    1.06    1.97
   0 -14  -8    1.11    2.57
   0 -14  -8    1.14    2.60
   0 -14  -8    2.74    1.45
   0 -14  -9   93.91    5.09
   0 -14  -9   83.56    5.18
   0 -14  -9  102.78    6.77
   0 -14  -9  101.44    4.98
   0 -14  -9  109.89    6.90
   0 -14  -9  104.22    4.89
   0 -14  -9   73.43    6.50
   0 -14 -10   20.96    2.14
   0 -14 -10   23.94    3.61
   0 -14 -10   24.93    2.02
   0 -14 -10   20.41    2.33
   0 -14 -10   24.90    1.87
   0 -14 -11   10.02    1.84
   0 -14 -11    8.70    1.74
   0 -14 -11    9.23    1.52
   0 -14 -11   11.78    2.99
   0 -14 -11    7.80    1.92
   0 -14 -11    3.55    2.72
   0 -14 -11   13.71    1.46
   0 -14 -12   36.60    2.26
   0 -14 -12   42.92    4.28
   0 -14 -12   33.39    2.47
   0 -14 -12   32.45    2.72
   0 -14 -12   27.27    3.70
   0  14  12   33.94    3.17
   0 -14 -12   36.50    2.65
   0 -14 -12   36.50    2.38
   0 -14 -12   35.49    3.96
   0  14  12   36.20    4.76
   0 -14 -12   35.49    2.83
   0 -14 -13    0.61    1.83
   0 -14 -13    2.13    1.32
   0 -14 -13    6.17    1.26
   0 -14 -13    2.44    1.40
   0  14  13    1.16    2.00
   0 -14 -13    3.05    1.80
   0 -14 -13    3.39    1.21
   0 -14 -14   19.93    2.28
   0 -14 -14   20.95    1.69
   0 -14 -15   45.85    3.43
   0 -14 -15   48.95    3.40
   0  14  16   72.07    4.71
   0 -14 -16   67.24    4.14
   0 -14 -16   75.37    4.17
   0 -14 -16   80.85    3.86
   0  14  17    6.10    2.48
   0 -14 -17    6.41    1.05
   0 -14 -17    4.76    1.61
   0 -14 -17    4.61    1.59
   0  14  18    2.38    2.10
   0 -14 -18    1.89    0.86
   0 -14 -18    1.67    1.35
   0 -14 -18    3.74    1.38
   0  14  19    6.22    1.75
   0 -14 -19    6.01    1.29
   0 -14 -19    7.52    1.29
   0  14  20    3.85    1.18
   0  14  20    5.59    1.53
   0 -14 -20    2.50    0.94
   0 -14 -20    2.27    0.90
   0 -14 -20    2.82    0.69
   0  14  21    4.57    0.96
   0  15  -7    2.86    0.71
   0 -15   7    3.35    0.78
   0  15  -6    0.70    0.88
   0 -15   6   -0.02    0.91
   0 -15   6    0.07    0.89
   0  15  -5    1.97    0.78
   0  15  -5    1.94    1.16
   0 -15   5    2.14    1.16
   0 -15   5    2.27    1.03
   0  15  -4    2.76    0.93
   0  15  -4    3.68    1.43
   0 -15   4    2.44    1.14
   0  15  -3   33.25    2.18
   0  15  -3   35.70    2.61
   0 -15   3   35.38    2.27
   0  15  -2   92.63    4.82
   0 -15   2   97.64    4.82
   0  15  -2   94.86    5.21
   0 -15   1   21.68    1.90
   0  15  -1   14.78    1.95
   0  15  -1   16.27    1.68
   0 -15   1   17.63    1.62
   0  15  -1   16.83    2.26
   0 -15   0    1.83    1.10
   0 -15   0    3.51    1.56
   0 -15   0    4.99    1.32
   0  15   0    3.68    2.00
   0  15   0    3.50    1.87
   0 -15   0    4.87    1.62
   0 -15  -1    0.14    1.16
   0 -15  -1    0.18    1.57
   0 -15  -1    2.77    1.37
   0  15   1    0.52    1.96
   0  15   1    1.36    2.03
   0 -15  -1   -0.53    1.72
   0 -15  -2    0.89    1.22
   0 -15  -2    0.61    1.68
   0  15   2    4.29    2.16
   0 -15  -2    0.30    1.85
   0 -15  -2    0.60    1.37
   0  15   2    1.26    2.03
   0  15   3   26.85    2.59
   0 -15  -3   23.36    2.29
   0 -15  -3   21.11    1.96
   0 -15  -3   16.38    3.43
   0 -15  -3   19.70    2.32
   0 -15  -3   24.93    3.71
   0 -15  -3   27.34    2.13
   0 -15  -4    3.91    3.08
   0 -15  -4    1.87    2.99
   0 -15  -4   -0.04    1.31
   0 -15  -4   -0.15    1.81
   0 -15  -4   -1.31    2.91
   0 -15  -4    1.83    2.05
   0 -15  -4    0.86    1.46
   0  15   4   -0.89    2.02
   0 -15  -4    1.31    2.75
   0  15   4   -0.84    1.82
   0  15   5   17.73    2.39
   0 -15  -5   14.67    1.93
   0 -15  -5   15.04    1.81
   0 -15  -5   12.82    3.31
   0 -15  -5   14.05    2.35
   0 -15  -5   21.42    1.91
   0 -15  -5   20.41    3.47
   0 -15  -5   23.28    3.72
   0 -15  -6   34.15    4.15
   0 -15  -6   26.29    2.54
   0 -15  -6   28.68    2.31
   0 -15  -6   19.10    3.72
   0 -15  -6   19.59    2.68
   0 -15  -6   27.91    2.30
   0 -15  -6   34.01    3.92
   0 -15  -6   35.39    2.31
   0 -15  -7    1.47    1.42
   0 -15  -7    1.22    1.56
   0 -15  -7    1.13    1.81
   0 -15  -7    1.76    1.44
   0 -15  -7    0.17    2.78
   0 -15  -8    0.05    1.65
   0 -15  -8    0.66    1.58
   0 -15  -8    0.19    2.76
   0 -15  -8    1.64    2.77
   0 -15  -8   -0.17    2.64
   0 -15  -9   22.16    2.27
   0 -15  -9   22.11    2.44
   0 -15  -9   16.84    3.58
   0 -15  -9   27.38    3.70
   0 -15  -9   20.58    1.96
   0 -15  -9   24.06    3.71
   0 -15 -10   69.49    4.01
   0 -15 -10   64.20    4.10
   0 -15 -10   76.01    3.91
   0 -15 -11    2.23    1.70
   0  15  11    0.97    2.45
   0 -15 -11    3.07    1.36
   0 -15 -11    2.84    1.61
   0 -15 -12    2.77    1.49
   0 -15 -12    0.94    1.77
   0 -15 -12    2.10    1.29
   0  15  12    5.80    2.35
   0 -15 -12    3.91    1.62
   0 -15 -12    2.48    1.17
   0 -15 -12    0.42    1.81
   0 -15 -13    7.83    1.95
   0 -15 -13    9.41    1.54
   0 -15 -13   13.30    1.43
   0  15  13    5.29    2.07
   0 -15 -13   13.55    1.33
   0 -15 -13    8.57    1.87
   0 -15 -14   -0.55    1.11
   0 -15 -14    1.71    1.06
   0 -15 -14   -0.42    1.66
   0 -15 -15   59.31    3.51
   0 -15 -15   55.27    3.46
   0 -15 -15   60.52    3.11
   0 -15 -16   39.18    2.58
   0 -15 -16   28.28    2.32
   0  15  16   33.02    3.27
   0 -15 -16   41.68    2.15
   0 -15 -16   34.86    2.48
   0  15  17   20.10    2.59
   0 -15 -17   20.72    1.92
   0 -15 -17   21.90    1.98
   0 -15 -17   26.70    1.57
   0  15  18    0.41    1.91
   0 -15 -18    2.90    1.19
   0  15  19    6.37    1.80
   0 -15 -19    3.35    0.94
   0  15  19    2.60    1.44
   0 -15 -19    3.03    1.09
   0 -15 -19    1.71    0.89
   0  15  20   13.34    1.46
   0  16  -5    1.36    0.69
   0 -16   5    1.39    0.81
   0 -16   5    1.37    0.58
   0  16  -4    0.95    0.94
   0 -16   4    1.13    0.72
   0  16  -3    0.96    1.16
   0 -16   3    0.61    1.13
   0 -16   3    1.03    0.81
   0 -16   2   32.68    2.20
   0 -16   2   29.82    1.92
   0  16  -1    3.17    1.54
   0  16   0    0.75    1.49
   0 -16   0    1.73    1.37
   0 -16   0    0.38    1.05
   0  16   0    0.16    1.63
   0 -16  -1    4.01    1.52
   0  16   1    3.99    1.76
   0 -16  -1    3.64    1.59
   0  16   1    7.17    1.80
   0 -16  -1    3.13    1.21
   0 -16  -1    0.40    1.37
   0 -16  -2   24.35    1.84
   0  16   2   25.24    2.51
   0  16   2   21.57    2.50
   0 -16  -2   20.57    2.22
   0 -16  -2   25.19    2.28
   0  16   3    8.59    2.30
   0 -16  -3    5.64    1.88
   0  16   3   10.25    2.09
   0 -16  -3    9.58    1.79
   0 -16  -3   11.01    1.48
   0 -16  -4   92.54    4.84
   0 -16  -4  100.46    4.97
   0 -16  -4   88.93    5.16
   0  16   4   82.47    5.41
   0 -16  -4  102.19    4.92
   0 -16  -4   97.53    5.12
   0 -16  -5   -0.42    1.28
   0 -16  -5   -0.36    1.93
   0  16   5    1.40    2.35
   0 -16  -5    1.73    1.39
   0 -16  -5   -0.56    1.44
   0 -16  -6   27.05    2.52
   0 -16  -6   30.16    2.24
   0 -16  -6   25.35    1.94
   0  16   6   27.43    3.07
   0 -16  -6   23.91    2.64
   0 -16  -6   31.65    2.25
   0 -16  -6   28.77    2.19
   0  16   7   10.02    2.63
   0 -16  -7    5.56    2.04
   0 -16  -7   10.67    1.59
   0 -16  -7    7.40    1.47
   0 -16  -7    9.47    1.99
   0 -16  -7    6.60    1.55
   0 -16  -8   20.30    2.00
   0 -16  -8   19.15    2.25
   0 -16  -9   20.27    2.26
   0  16   9   19.12    2.98
   0 -16  -9   16.78    1.79
   0 -16  -9   17.23    1.93
   0 -16  -9   15.28    2.11
   0  16  10    1.46    2.47
   0 -16 -10    0.05    1.63
   0 -16 -10    0.59    1.34
   0 -16 -10    0.80    1.57
   0 -16 -11    1.36    1.64
   0  16  11    0.77    2.34
   0 -16 -11   -2.40    1.91
   0 -16 -11    3.25    1.35
   0 -16 -11    1.90    1.63
   0 -16 -12   20.12    2.11
   0 -16 -12   18.91    2.16
   0  16  12   18.50    2.66
   0 -16 -12   19.92    2.04
   0 -16 -12   25.10    1.84
   0 -16 -12   21.48    1.95
   0 -16 -13   16.44    1.98
   0 -16 -13   18.74    1.71
   0 -16 -13   16.96    1.89
   0 -16 -13   14.00    1.59
   0 -16 -13   21.04    1.61
   0 -16 -14   30.99    2.30
   0 -16 -14   28.95    1.91
   0 -16 -14   30.29    2.37
   0 -16 -15   21.57    1.97
   0 -16 -15   24.68    2.03
   0  16  16    9.34    2.41
   0 -16 -16    7.55    1.34
   0 -16 -16   13.42    1.58
   0 -16 -16   10.42    1.46
   0  16  17    5.14    2.09
   0 -16 -17    5.66    1.17
   0 -16 -17    7.79    1.31
   0  16  18    6.81    1.79
   0 -16 -18    3.57    1.24
   0  16  18    7.43    1.97
   0 -16 -19    1.40    0.78
   0 -16 -19    2.17    0.73
   0 -17   3   -0.03    0.76
   0 -17   3    0.95    0.85
   0  17  -3    1.09    0.94
   0  17  -2    0.46    0.91
   0 -17   2    0.81    0.95
   0  17  -1   12.11    1.39
   0 -17   1   14.23    1.34
   0  17   0    0.08    1.24
   0 -17   0   -0.33    1.11
   0 -17   0    0.44    1.09
   0 -17  -1    0.09    1.14
   0  17   1   -1.11    1.35
   0  17   1    2.43    1.42
   0 -17  -1    1.03    1.25
   0 -17  -1    0.09    1.18
   0 -17  -1   -0.53    1.02
   0 -17  -2    2.94    1.36
   0 -17  -2    3.97    1.42
   0  17   2    2.21    1.64
   0 -17  -2    2.43    1.12
   0 -17  -2    1.10    1.23
   0 -17  -2    0.96    1.17
   0 -17  -2    2.03    1.21
   0 -17  -3  104.43    5.25
   0 -17  -3  112.19    5.31
   0 -17  -3  112.93    5.44
   0 -17  -3   93.93    5.41
   0  17   3   94.13    5.59
   0 -17  -3  111.83    5.31
   0 -17  -3  113.90    5.29
   0 -17  -4    5.11    1.64
   0 -17  -4    3.07    1.11
   0 -17  -4    3.42    1.21
   0 -17  -4    4.78    1.59
   0  17   4    3.56    1.90
   0 -17  -4    4.95    1.31
   0 -17  -4    1.10    1.15
   0 -17  -5  116.89    5.73
   0 -17  -5  105.61    5.97
   0  17   5  108.27    6.18
   0 -17  -5  119.73    5.73
   0 -17  -5  114.68    5.66
   0  17   6   18.05    2.66
   0 -17  -6   16.85    2.08
   0 -17  -6   22.96    1.84
   0 -17  -6   21.61    1.61
   0 -17  -6   21.33    1.80
   0 -17  -7    1.57    1.77
   0 -17  -7    1.93    1.30
   0 -17  -7    0.04    1.28
   0 -17  -7    3.43    1.79
   0  17   7    2.39    2.28
   0 -17  -8   21.09    2.26
   0 -17  -8   21.91    1.87
   0 -17  -8   20.48    1.90
   0  17   9    5.38    2.38
   0 -17  -9    6.31    1.68
   0 -17  -9    6.72    1.64
   0 -17  -9    6.96    1.46
   0  17  10    3.20    2.32
   0 -17 -10    2.00    1.53
   0 -17 -10    3.04    1.26
   0 -17 -10    4.52    1.59
   0 -17 -10    0.63    1.46
   0 -17 -11    2.87    1.47
   0 -17 -11    4.45    1.19
   0  17  11    1.21    2.19
   0 -17 -11    3.14    1.48
   0 -17 -11    1.65    1.68
   0 -17 -11    1.11    1.34
   0 -17 -12    6.53    1.38
   0 -17 -12    5.71    1.14
   0  17  12    1.07    2.02
   0 -17 -12   -0.04    1.35
   0 -17 -12    3.38    1.53
   0 -17 -12    3.02    1.23
   0 -17 -13    8.10    1.26
   0 -17 -13    8.87    1.57
   0 -17 -13    9.94    1.38
   0 -17 -14    0.62    1.19
   0 -17 -14    1.69    0.93
   0 -17 -14    0.72    0.96
   0 -17 -14    0.44    1.32
   0  17  15    0.34    2.21
   0 -17 -15    2.05    1.17
   0 -17 -15    1.52    1.24
   0 -17 -15    0.56    1.30
   0  17  16   20.08    2.37
   0 -17 -16   15.49    1.37
   0 -17 -16   19.35    1.59
   0  17  17    0.03    1.70
   0 -17 -17   -1.43    1.18
   0 -17 -17    1.05    0.94
   0 -17 -18   11.02    0.94
   0  17  18    9.32    1.40
   0 -17 -18    8.58    1.04
   0 -18   2    7.23    0.73
   0 -18   1    3.76    0.76
   0  18  -1    2.28    0.99
   0 -18   0    3.36    0.67
   0 -18   0    4.08    0.90
   0 -18  -1    2.42    0.77
   0 -18  -1    0.80    0.91
   0 -18  -2    1.91    0.84
   0 -18  -2    2.14    0.94
   0  18   3    3.94    1.44
   0 -18  -3    1.57    1.21
   0 -18  -3    1.80    0.97
   0 -18  -3    0.77    1.03
   0 -18  -3    1.69    0.93
   0 -18  -3    2.14    1.18
   0 -18  -4   44.17    2.53
   0 -18  -4   41.02    2.24
   0 -18  -4   42.63    2.41
   0 -18  -4   45.38    2.36
   0 -18  -5   17.77    1.69
   0  18   5    8.02    1.96
   0 -18  -5   12.41    1.61
   0 -18  -5   12.22    1.18
   0 -18  -5   14.08    1.51
   0 -18  -5   13.83    1.41
   0 -18  -6    2.94    1.42
   0  18   6    2.96    1.91
   0 -18  -6    3.77    1.13
   0 -18  -6    3.38    1.07
   0  18   7   -1.48    1.95
   0 -18  -7    2.88    1.38
   0 -18  -7    2.15    1.14
   0 -18  -7   -2.15    1.29
   0 -18  -7    0.97    1.08
   0 -18  -7   -0.11    1.38
   0  18   8    1.70    2.02
   0 -18  -8    2.91    1.18
   0 -18  -8    2.22    1.48
   0 -18  -8    0.30    1.20
   0 -18  -8   -0.09    1.26
   0 -18  -9   26.44    2.19
   0 -18  -9   33.65    2.26
   0 -18  -9   28.65    2.01
   0 -18  -9   27.39    2.02
   0 -18 -10    1.05    1.31
   0 -18 -10   -1.14    1.22
   0 -18 -10    1.13    1.09
   0 -18 -10    0.66    1.34
   0  18  10   -0.28    1.93
   0 -18 -10   -0.59    1.50
   0 -18 -10    0.23    1.20
   0 -18 -11    2.16    1.24
   0 -18 -11   -1.16    1.27
   0 -18 -11   -0.11    1.03
   0 -18 -11   -1.63    1.30
   0  18  11    0.63    1.95
   0 -18 -11    0.38    1.32
   0 -18 -11   -0.60    1.15
   0 -18 -12    0.14    1.17
   0  18  12    2.22    1.70
   0 -18 -12    1.95    1.15
   0 -18 -12    1.34    1.06
   0 -18 -12    1.30    0.98
   0 -18 -13   22.91    1.47
   0 -18 -13   17.68    1.52
   0 -18 -14    2.82    1.11
   0  18  14    3.42    1.33
   0 -18 -14    1.26    1.27
   0 -18 -14    1.94    0.72
   0  18  15   30.27    2.51
   0 -18 -15   28.06    1.73
   0 -18 -16   14.51    1.46
   0  18  16   15.87    1.92
   0 -18 -16   18.93    1.27
   0 -18 -17    0.48    0.64
   0 -18 -17    0.98    0.79
   0  19   1    9.96    1.00
   0 -19  -2   23.06    1.33
   0  19   2   24.81    1.60
   0 -19  -3   11.23    0.86
   0  19   3   11.58    1.26
   0 -19  -4   18.57    1.16
   0 -19  -4   19.18    1.43
   0  19   4   18.81    1.56
   0 -19  -5    2.28    0.96
   0  19   5    3.52    1.10
   0 -19  -5    0.56    1.08
   0  19   6   12.67    1.74
   0 -19  -6   12.26    1.39
   0  19   6   15.77    1.41
   0  19   6   14.05    1.35
   0 -19  -7    1.12    1.19
   0 -19  -7    2.98    0.95
   0  19   7    3.93    1.56
   0 -19  -7    0.60    1.12
   0  19   8    4.14    1.65
   0 -19  -8    0.18    1.10
   0 -19  -8    2.55    1.03
   0 -19  -8    1.24    1.19
   0 -19  -8    2.55    0.94
   0 -19  -9   -0.19    1.21
   0 -19  -9    0.51    0.91
   0 -19  -9   -0.03    1.16
   0 -19  -9    0.60    1.02
   0 -19 -10   37.44    2.07
   0 -19 -10   30.48    2.12
   0 -19 -10   37.86    2.12
   0 -19 -10   37.70    2.21
   0 -19 -11   19.15    1.43
   0 -19 -11   17.27    1.34
   0 -19 -11   20.80    1.40
   0 -19 -11   17.46    1.48
   0 -19 -12    6.12    1.01
   0 -19 -12    3.98    0.98
   0  19  12    7.64    1.70
   0 -19 -12    5.99    0.92
   0 -19 -12    4.65    1.31
   0 -19 -13    6.80    0.80
   0  19  13    8.56    1.43
   0 -19 -13    6.87    1.23
   0 -19 -13   10.19    0.83
   0  19  14   12.34    1.74
   0 -19 -14   10.21    1.06
   0 -19 -14   12.11    1.14
   0  19  15   17.62    1.64
   0 -19 -15   17.54    1.22
   0 -19 -15   18.64    1.15
   0 -20  -6    4.37    0.71
   0 -20  -6    4.76    0.65
   0  20   6    4.16    0.95
   0  20   7    1.90    1.10
   0 -20  -8    0.62    0.75
   0 -20  -8    0.96    0.66
   0 -20  -9    1.44    0.74
   0  20   9    2.29    1.21
   0 -20  -9    1.30    0.67
   0 -20  -9    0.62    0.83
   0 -20 -10   19.77    1.16
   0 -20 -10   18.97    1.20
   0 -20 -11   15.10    1.16
   0  20  11   17.55    1.45
  -1  19  13   32.61    2.14
   1 -19 -13   32.12    1.62
   1 -19 -12   53.01    2.59
   1 -19 -12   50.42    2.37
   1 -19 -12   44.98    2.38
  -1  19  12   40.37    2.71
   1 -19 -11   27.09    1.82
   1 -19 -11   29.92    1.59
   1 -19 -11   28.28    1.64
   1 -19 -10   26.69    1.77
   1 -19 -10   26.43    1.80
   1 -19  -9    1.51    1.07
   1 -19  -9    1.75    1.19
   1 -19  -9    3.03    1.02
   1 -19  -9    2.48    0.91
   1 -19  -8    4.66    1.13
   1 -19  -8    2.98    1.14
   1 -19  -8    5.03    1.09
   1 -19  -8    6.85    1.00
   1 -19  -7   11.03    1.41
   1 -19  -6    0.75    0.84
   1 -19  -6    0.13    0.96
  -1  19   5    5.79    0.86
   1 -19  -5    7.94    0.87
   1 -19  -5    7.09    0.97
  -1  19   4   10.16    1.00
  -1  19   3    4.26    0.77
   1 -18 -16   69.83    3.31
  -1  18  15    1.52    1.51
   1 -18 -15    0.13    0.79
   1 -18 -15    0.84    0.79
   1 -18 -14    8.92    1.09
   1 -18 -14    7.04    1.34
  -1  18  14    7.23    1.89
   1 -18 -14    8.33    1.22
   1 -18 -14    6.70    1.01
   1 -18 -13   12.22    1.18
   1 -18 -13   13.86    1.14
   1 -18 -13   15.03    1.30
   1 -18 -13   13.58    1.60
   1 -18 -13   14.14    1.24
   1 -18 -13   14.23    1.59
   1 -18 -12   30.02    1.96
   1 -18 -12   33.44    2.00
   1 -18 -12   30.69    1.91
   1 -18 -12   30.68    2.29
   1 -18 -12   32.30    2.06
   1 -18 -12   31.13    2.20
   1 -18 -11  104.59    4.56
   1 -18 -11   92.25    4.54
   1 -18 -11   97.72    4.62
  -1  18  11   60.28    4.82
   1 -18 -11   76.68    4.55
   1 -18 -11   88.61    4.61
   1 -18 -11  116.12    4.57
   1 -18 -10   26.80    1.87
   1 -18 -10   26.40    1.80
   1 -18 -10   29.17    2.02
   1 -18 -10   22.22    1.94
   1 -18 -10   27.25    2.12
   1 -18 -10   29.83    1.81
   1 -18  -9   14.91    1.49
   1 -18  -9   12.35    1.81
   1 -18  -9   11.56    1.57
  -1  18   8    1.78    1.82
   1 -18  -8    1.96    1.39
   1 -18  -8    5.70    1.14
   1 -18  -8    4.93    1.26
   1 -18  -8    1.51    1.43
   1 -18  -7   18.19    1.82
  -1  18   7   13.38    2.13
   1 -18  -7   15.32    1.78
   1 -18  -6    4.13    1.38
  -1  18   6    4.76    1.67
   1 -18  -6    5.93    0.92
   1 -18  -6    5.40    1.12
   1 -18  -5    1.39    1.28
   1 -18  -5    1.91    1.02
  -1  18   5    1.78    1.54
   1 -18  -5    1.55    1.27
   1 -18  -5    3.32    0.92
   1 -18  -5    2.12    0.72
   1 -18  -5    4.09    1.14
   1 -18  -4   -0.72    1.20
   1 -18  -4    0.26    0.82
   1 -18  -4    1.27    1.02
   1 -18  -4   -0.33    1.19
  -1  18   4   -0.28    1.36
   1 -18  -4    2.67    0.91
   1 -18  -4    1.49    0.96
   1 -18  -3   29.73    1.68
   1 -18  -3   25.38    1.66
   1 -18  -2    3.60    0.86
   1 -18  -2    4.16    0.84
   1 -18  -1    1.28    0.74
   1 -18  -1    2.09    0.69
   1 -18   0    2.29    0.68
   1 -18   1   36.75    1.70
  -1  18  -1   28.78    1.74
   1 -17 -18    7.69    0.72
  -1  17  17   21.50    1.74
   1 -17 -17   22.85    1.45
   1 -17 -17   22.85    1.67
  -1  17  16    1.85    1.68
   1 -17 -16    5.13    1.05
   1 -17 -16    2.77    0.88
   1 -17 -16    1.78    1.35
   1 -17 -15    5.65    1.29
  -1  17  15    4.04    2.00
   1 -17 -14    0.22    1.49
   1 -17 -14    1.73    0.85
   1 -17 -13    2.34    1.06
   1 -17 -13    5.57    1.36
   1 -17 -13    1.61    1.11
   1 -17 -13    4.17    1.37
   1 -17 -12    7.27    1.41
   1 -17 -12    9.03    1.48
   1 -17 -12    6.92    1.28
  -1  17  12    9.83    2.07
   1 -17 -12    6.99    1.45
   1 -17 -12    5.23    1.17
   1 -17 -12    8.39    1.69
   1 -17 -11   49.34    2.97
   1 -17 -11   49.00    2.90
   1 -17 -11   52.71    2.88
   1 -17 -11   42.11    2.93
  -1  17  11   37.26    3.32
   1 -17 -11   58.55    2.84
   1 -17 -11   47.02    3.10
   1 -17 -10   64.38    3.48
   1 -17 -10   59.31    3.34
   1 -17 -10   62.09    3.33
  -1  17  10   45.29    3.77
   1 -17 -10   51.23    3.43
   1 -17 -10   73.08    3.38
   1 -17 -10   58.67    3.61
  -1  17   9    7.40    2.29
   1 -17  -9   10.66    1.81
   1 -17  -9   14.40    1.83
   1 -17  -9   11.04    1.50
   1 -17  -9   11.49    1.63
   1 -17  -8    0.44    1.21
   1 -17  -8    3.56    1.67
   1 -17  -8    2.70    1.45
   1 -17  -8    4.28    1.29
   1 -17  -8    2.96    1.15
   1 -17  -7    0.37    1.16
   1 -17  -7    2.48    1.66
  -1  17   7    1.71    1.99
   1 -17  -7    1.82    1.66
   1 -17  -7    2.72    1.43
   1 -17  -7    0.75    1.23
   1 -17  -7    3.62    1.22
   1 -17  -6   -0.70    1.63
  -1  17   6    2.27    1.98
   1 -17  -6    0.78    0.94
   1 -17  -6    1.17    1.22
   1 -17  -6    0.16    1.20
   1 -17  -5   31.85    2.28
   1 -17  -5   23.46    1.73
   1 -17  -5   28.04    2.02
   1 -17  -5   20.17    2.21
  -1  17   5   20.47    2.48
   1 -17  -5   28.40    1.93
   1 -17  -5   22.27    1.90
   1 -17  -4    2.98    1.50
   1 -17  -4    0.89    1.29
   1 -17  -4    1.75    1.05
  -1  17   4    5.32    1.83
   1 -17  -4    0.57    1.54
   1 -17  -4    1.52    1.21
   1 -17  -4    2.91    1.29
   1 -17  -3   -1.36    1.48
   1 -17  -3    0.23    1.22
   1 -17  -3    1.46    1.09
   1 -17  -3   -0.19    1.42
  -1  17   3    1.58    1.51
   1 -17  -3   -0.03    1.07
   1 -17  -3   -0.25    1.24
   1 -17  -2    0.03    1.26
  -1  17   2    1.68    1.32
   1 -17  -2    1.48    1.29
   1 -17  -2   -0.49    1.04
   1 -17  -2    1.81    1.01
   1 -17  -2   -0.42    1.20
   1 -17  -1   -1.69    1.16
   1 -17  -1    0.85    1.04
   1 -17  -1    0.22    1.03
   1 -17   0    5.30    1.05
   1 -17   0    4.76    1.13
   1 -17   1   21.74    1.54
   1 -17   1   20.99    1.54
   1 -17   2    5.84    0.87
   1 -17   2    5.56    0.89
  -1  17  -3    0.28    0.65
   1 -16 -19    0.50    0.74
  -1  16  19    1.24    1.09
  -1  16  18    2.36    1.21
   1 -16 -18    2.31    1.14
   1 -16 -18    3.41    0.94
  -1  16  17    3.62    1.67
   1 -16 -17    0.94    1.45
   1 -16 -17    4.26    1.16
  -1  16  16    1.33    1.98
   1 -16 -16    2.99    1.31
   1 -16 -16    2.35    1.18
   1 -16 -15    4.43    1.41
   1 -16 -15    1.20    1.47
   1 -16 -14   25.43    1.86
   1 -16 -14   29.83    1.84
   1 -16 -14   32.26    2.18
   1 -16 -14   29.49    2.42
   1 -16 -13    4.67    1.36
   1 -16 -13    7.14    1.70
   1 -16 -13    4.54    1.36
   1 -16 -13    9.04    1.30
   1 -16 -12    0.38    1.51
   1 -16 -12    3.50    1.45
   1 -16 -12   -0.62    1.84
   1 -16 -12    0.32    1.44
  -1  16  12    2.84    2.09
   1 -16 -12    1.98    1.25
   1 -16 -12   -0.52    1.32
   1 -16 -11    6.64    1.67
   1 -16 -11    4.51    1.61
   1 -16 -11    2.65    2.00
   1 -16 -11    4.72    1.77
  -1  16  11    5.02    2.22
   1 -16 -11    5.82    1.42
   1 -16 -11    5.11    1.44
   1 -16 -10   57.34    3.27
   1 -16 -10   48.46    3.11
   1 -16 -10   48.76    2.93
   1 -16 -10   48.88    3.28
  -1  16  10   41.42    3.65
   1 -16 -10   62.17    3.13
   1 -16 -10   48.71    3.07
   1 -16  -9    7.75    1.78
   1 -16  -9    1.90    1.51
   1 -16  -9    5.81    1.42
   1 -16  -9    3.86    1.77
   1 -16  -9    3.44    1.58
   1 -16  -9    4.80    1.41
   1 -16  -8    5.19    1.45
   1 -16  -8    5.64    1.45
   1 -16  -8    3.28    1.81
   1 -16  -7   14.70    1.68
   1 -16  -7   14.55    1.81
   1 -16  -7   16.76    2.31
   1 -16  -7   15.24    1.73
   1 -16  -7   18.48    2.26
   1 -16  -6   24.42    2.46
   1 -16  -6   24.80    1.98
   1 -16  -6   25.56    2.20
   1 -16  -6   22.26    2.52
   1 -16  -6   30.55    2.19
   1 -16  -6   23.47    1.80
   1 -16  -5   15.76    1.61
   1 -16  -5   18.39    2.27
   1 -16  -5   16.74    1.94
   1 -16  -5   19.23    1.80
   1 -16  -5   20.24    1.70
   1 -16  -4  247.83   11.40
   1 -16  -4  216.70   11.38
   1 -16  -4  236.10   11.31
   1 -16  -4  260.04   11.26
   1 -16  -4  236.15   11.17
   1 -16  -4  250.53   11.28
   1 -16  -3   21.95    2.16
   1 -16  -3   19.19    2.07
   1 -16  -3   26.64    1.96
   1 -16  -3   22.36    1.90
   1 -16  -3   23.29    1.97
   1 -16  -3   21.97    2.23
   1 -16  -2   12.11    1.71
  -1  16   2   10.21    1.88
   1 -16  -2    6.67    1.77
   1 -16  -2    9.41    1.46
   1 -16  -2    8.42    1.48
   1 -16  -2   10.05    1.50
   1 -16  -1    2.39    1.43
  -1  16   1    2.70    1.58
   1 -16  -1    0.12    1.43
  -1  16   1    1.21    1.35
   1 -16  -1    3.05    1.18
   1 -16  -1    2.35    1.31
  -1  16   0   -0.04    1.26
   1 -16   0    0.92    1.25
   1 -16   0    1.00    1.24
  -1  16   0    0.80    1.33
   1 -16   1    0.19    1.19
  -1  16  -1    0.71    1.14
   1 -16   2    3.87    0.79
   1 -16   2    4.24    1.20
  -1  16  -2    4.86    1.08
   1 -16   3   24.95    1.56
  -1  16  -3   27.75    1.66
   1 -16   4    0.32    0.57
   1 -16   5   15.45    1.04
  -1  15  20    1.41    0.94
   1 -15 -19    6.15    1.07
   1 -15 -19    8.18    1.00
  -1  15  18    2.76    1.63
   1 -15 -18   -0.32    1.09
   1 -15 -18   -0.18    1.33
  -1  15  17    1.50    1.91
   1 -15 -17    1.09    0.81
   1 -15 -17    2.03    1.33
  -1  15  16    8.36    2.30
   1 -15 -16   12.84    1.57
   1 -15 -16   11.93    1.21
   1 -15 -16   13.88    1.72
   1 -15 -15   83.61    4.62
   1 -15 -15   80.19    4.42
   1 -15 -15   96.82    4.35
   1 -15 -15   82.01    4.49
   1 -15 -15   92.25    4.65
   1 -15 -14    4.99    1.69
   1 -15 -14    2.37    1.42
   1 -15 -14    3.04    1.63
   1 -15 -14    3.34    1.06
   1 -15 -14    2.10    1.13
   1 -15 -13    1.05    1.18
   1 -15 -13   -1.81    1.40
   1 -15 -13    0.76    1.82
   1 -15 -13    1.38    1.09
   1 -15 -13    0.19    1.25
   1 -15 -12    1.88    1.49
   1 -15 -12   -0.39    1.37
   1 -15 -12   -1.98    1.67
  -1  15  12    3.59    2.19
   1 -15 -12    0.83    1.31
   1 -15 -12    0.53    2.01
   1 -15 -11    5.16    1.63
   1 -15 -11    0.30    1.75
   1 -15 -11   -0.15    1.51
   1 -15 -11    4.48    1.73
   1 -15 -11    3.06    1.36
   1 -15 -11   -3.78    2.23
   1 -15 -10    7.78    1.99
   1 -15 -10    7.66    1.56
   1 -15 -10   10.16    1.56
   1 -15 -10    3.20    1.72
   1 -15 -10    7.17    1.88
   1 -15  -9   32.71    2.43
   1 -15  -9   29.17    2.32
   1 -15  -9   25.12    2.64
   1 -15  -9   28.72    2.51
   1 -15  -9   33.62    2.32
   1 -15  -8   12.40    1.80
   1 -15  -8   12.62    1.73
   1 -15  -8   12.14    2.05
   1 -15  -7    1.11    1.36
   1 -15  -7    0.66    1.91
   1 -15  -7    1.72    1.48
   1 -15  -7    2.91    1.67
   1 -15  -6   13.40    1.71
   1 -15  -6   15.10    2.26
   1 -15  -6   16.14    1.60
   1 -15  -6   13.28    2.31
   1 -15  -6   17.17    1.84
   1 -15  -6   13.79    1.95
   1 -15  -5   58.04    3.44
   1 -15  -5   60.06    3.44
   1 -15  -5   53.33    3.84
   1 -15  -5   58.92    3.66
   1 -15  -4   61.47    3.71
   1 -15  -4   56.21    3.30
   1 -15  -4   57.16    3.60
   1 -15  -4   52.40    3.79
   1 -15  -4   56.87    3.34
   1 -15  -3   17.99    1.68
   1 -15  -3   21.21    2.42
   1 -15  -3   21.30    2.27
   1 -15  -3   18.84    1.95
  -1  15   3   22.52    2.32
   1 -15  -2   16.50    1.60
  -1  15   2   14.47    2.10
   1 -15  -2   14.35    2.21
   1 -15  -2   17.92    2.09
   1 -15  -2   14.37    1.86
   1 -15  -2   17.93    1.83
   1 -15  -1   56.22    3.15
   1 -15  -1   60.02    3.43
  -1  15   1   52.53    3.55
  -1  15   1   49.05    3.51
   1 -15  -1   50.58    3.44
   1 -15  -1   60.27    3.25
   1 -15  -1   59.10    3.25
   1 -15   0    2.42    1.13
   1 -15   0    2.93    1.10
   1 -15   0    4.40    1.53
   1 -15   0    1.37    1.57
  -1  15   0    2.59    1.62
   1 -15   0    4.27    1.27
  -1  15   0    2.04    1.61
   1 -15   0    3.92    1.33
   1 -15   1    3.91    1.13
  -1  15  -1    2.23    1.53
   1 -15   1    3.12    1.40
   1 -15   1    2.24    1.05
   1 -15   2   16.57    1.48
  -1  15  -2   14.34    1.76
   1 -15   2   13.42    1.71
   1 -15   2   13.76    1.31
   1 -15   3   10.07    1.31
  -1  15  -3   10.23    1.43
   1 -15   4   28.38    1.90
  -1  15  -4   30.89    1.97
   1 -15   5    6.05    1.03
   1 -15   5    5.66    1.09
  -1  15  -5    6.89    0.96
   1 -15   6   11.91    1.04
  -1  15  -6   10.03    0.87
   1 -14 -20    5.05    0.97
  -1  14  20    7.19    1.39
   1 -14 -19    2.89    1.05
  -1  14  19    4.27    1.29
   1 -14 -19    2.69    1.19
  -1  14  18    8.98    1.89
   1 -14 -18    8.52    1.72
   1 -14 -18   11.60    1.10
  -1  14  17    8.70    2.21
   1 -14 -17    7.63    1.44
   1 -14 -17    9.93    1.15
   1 -14 -17    7.84    1.68
   1 -14 -16   12.69    1.88
   1 -14 -16    9.68    1.59
  -1  14  16   11.97    2.47
   1 -14 -16    8.70    1.58
   1 -14 -16    9.99    1.22
   1 -14 -15   51.56    3.26
   1 -14 -15   46.29    3.01
   1 -14 -15   42.24    3.14
   1 -14 -15   45.05    3.03
   1 -14 -14   31.79    2.64
   1 -14 -14   32.88    2.11
   1 -14 -14   29.01    2.55
   1 -14 -14   29.74    2.47
   1 -14 -13   19.10    1.76
   1 -14 -13   20.49    1.88
   1 -14 -13   16.71    2.21
   1 -14 -13   22.89    1.78
   1 -14 -13   12.26    1.83
  -1  14  13   13.05    2.21
   1 -14 -13   23.80    1.74
   1 -14 -13   18.11    2.35
   1 -14 -12   10.76    1.66
   1 -14 -12   12.54    1.82
   1 -14 -12   13.11    1.56
   1 -14 -12    8.49    1.86
   1 -14 -12    8.86    2.34
   1 -14 -12   15.42    1.54
   1 -14 -11    3.77    1.49
   1 -14 -11   -0.32    1.50
   1 -14 -11   -3.38    2.71
   1 -14 -11    0.83    1.71
   1 -14 -11    2.03    1.40
   1 -14 -11   -0.47    2.59
   1 -14 -11    0.30    2.54
   1 -14 -11    0.64    2.69
   1 -14 -11    0.99    1.24
   1 -14 -10   10.20    1.73
   1 -14 -10    9.10    1.83
   1 -14 -10    9.37    1.77
   1 -14 -10    7.00    3.06
   1 -14 -10   10.09    1.98
   1 -14 -10   10.02    1.62
   1 -14 -10   10.40    3.13
   1 -14 -10    9.47    1.43
   1 -14 -10    9.43    3.27
   1 -14 -10    7.75    2.87
   1 -14  -9    1.94    1.57
   1 -14  -9   -0.44    1.68
   1 -14  -9    1.69    1.60
   1 -14  -9    3.58    2.92
   1 -14  -9    2.09    1.95
   1 -14  -9    0.44    1.39
   1 -14  -9   -0.83    2.74
   1 -14  -9    1.64    2.88
   1 -14  -9   -0.93    2.70
   1 -14  -8    4.62    1.63
   1 -14  -8    3.09    1.85
   1 -14  -8    4.57    1.58
   1 -14  -8    4.94    3.22
   1 -14  -8    3.73    2.14
   1 -14  -8    3.76    2.81
   1 -14  -8    3.63    2.94
   1 -14  -8    5.38    2.97
   1 -14  -7    3.78    1.87
   1 -14  -7    3.44    1.51
   1 -14  -7    4.04    1.67
   1 -14  -7    2.38    2.76
   1 -14  -7    5.30    3.01
   1 -14  -6    1.67    3.05
   1 -14  -6   -2.09    2.72
   1 -14  -6   -0.54    1.18
   1 -14  -6    1.74    1.47
   1 -14  -6    0.15    1.80
   1 -14  -6   -0.58    3.00
   1 -14  -6    1.30    2.12
   1 -14  -6    1.70    2.99
   1 -14  -6    0.94    1.48
   1 -14  -6   -0.43    1.65
   1 -14  -5    5.86    2.90
   1 -14  -5    8.88    3.13
   1 -14  -5    1.88    1.36
   1 -14  -5    0.19    3.09
   1 -14  -5    0.98    2.20
   1 -14  -5    4.75    3.01
   1 -14  -5    4.58    1.57
   1 -14  -5    0.93    1.80
  -1  14   4    9.35    1.99
   1 -14  -4   14.66    3.31
   1 -14  -4   21.37    3.58
   1 -14  -4    9.47    1.50
   1 -14  -4    6.34    3.31
   1 -14  -4    7.60    2.26
   1 -14  -4   16.20    3.30
   1 -14  -4   13.47    1.76
   1 -14  -4    9.21    1.58
  -1  14   3   14.46    2.16
   1 -14  -3   13.12    3.26
   1 -14  -3   14.35    2.01
   1 -14  -3   12.10    1.55
   1 -14  -3   13.33    3.44
   1 -14  -3   13.28    2.22
   1 -14  -3   15.05    1.82
   1 -14  -3   15.01    3.32
   1 -14  -3   13.98    1.72
   1 -14  -2   14.53    1.77
  -1  14   2   17.67    2.27
   1 -14  -2   17.03    2.17
   1 -14  -2   15.85    1.62
   1 -14  -2   12.44    3.44
   1 -14  -2   14.67    2.33
   1 -14  -2   20.26    3.55
   1 -14  -2   21.67    1.94
  -1  14   1    0.19    1.83
   1 -14  -1    1.84    2.93
   1 -14  -1    1.19    1.09
   1 -14  -1   -0.33    1.66
   1 -14  -1    1.77    1.77
   1 -14  -1    0.63    1.31
   1 -14  -1    1.63    1.48
   1 -14  -1   -0.79    2.70
   1 -14  -1    1.10    2.63
   1 -14   0   49.15    2.96
   1 -14   0   48.46    3.21
   1 -14   0   53.59    3.17
   1 -14   0   44.27    2.87
  -1  14   0   48.66    3.44
   1 -14   0   52.60    2.94
   1 -14   0   46.85    3.00
   1 -14   1   22.59    1.85
  -1  14  -1   14.50    2.02
   1 -14   1   16.85    2.05
   1 -14   1   21.36    1.96
   1 -14   1   19.11    1.87
   1 -14   1   19.72    1.81
  -1  14  -1   18.96    2.24
   1 -14   1   20.48    1.77
  -1  14  -2   14.07    2.09
   1 -14   2   17.71    1.75
   1 -14   2   16.88    1.63
   1 -14   3   65.02    3.65
  -1  14  -3   70.71    4.00
   1 -14   3   70.09    3.80
   1 -14   3   69.28    3.66
  -1  14  -4    7.17    1.55
   1 -14   4    5.12    1.25
   1 -14   4    6.55    1.39
   1 -14   4    8.04    1.20
   1 -14   5   -0.65    1.20
   1 -14   5    0.81    1.03
  -1  14  -5    0.79    1.21
   1 -14   5    0.53    1.18
   1 -14   5    0.29    0.87
   1 -14   6    1.94    1.13
   1 -14   6    2.60    1.06
  -1  14  -6    2.13    1.06
   1 -14   6    2.24    0.98
   1 -14   7    1.14    0.93
  -1  14  -7    1.80    0.75
   1 -14   7    1.12    0.78
   1 -14   8    2.44    0.82
   1 -14   8    1.34    0.57
  -1  13  21   14.57    1.33
  -1  13  20    4.73    1.48
   1 -13 -20    2.59    1.08
   1 -13 -20    2.04    0.75
   1 -13 -19    2.67    0.84
   1 -13 -19    0.57    1.24
   1 -13 -19    1.75    1.09
   1 -13 -18   21.47    1.92
  -1  13  18   22.43    2.40
   1 -13 -18   18.07    2.13
  -1  13  17   19.69    2.63
   1 -13 -17   23.18    1.65
   1 -13 -17   24.17    2.22
   1 -13 -17   18.56    1.97
  -1  13  16   33.36    3.16
   1 -13 -16   32.36    2.60
   1 -13 -16   40.13    2.32
   1 -13 -16   36.47    2.77
   1 -13 -15   10.53    1.91
   1 -13 -15    9.45    1.97
   1 -13 -15   13.96    1.95
   1 -13 -15    8.59    1.33
   1 -13 -15   12.45    2.05
   1 -13 -14    5.94    1.78
   1 -13 -14    7.13    1.90
   1 -13 -14    9.46    2.04
   1 -13 -14    7.64    1.37
   1 -13 -13   20.78    1.89
   1 -13 -13   22.83    1.98
   1 -13 -13   20.68    2.43
   1 -13 -13   18.84    2.47
   1 -13 -13   15.13    2.01
   1 -13 -13   27.66    1.92
   1 -13 -13   33.22    2.03
   1 -13 -13   34.39    3.91
   1 -13 -12   39.28    4.00
   1 -13 -12   36.71    2.20
   1 -13 -12   26.42    2.27
   1 -13 -12   26.09    2.52
   1 -13 -12   24.46    2.39
   1 -13 -12   20.94    3.48
   1 -13 -12   37.53    2.28
   1 -13 -12   34.48    3.82
   1 -13 -12   21.88    2.73
   1 -13 -11  104.33    6.83
   1 -13 -11   99.32    4.90
   1 -13 -11   96.36    5.08
   1 -13 -11   93.58    5.00
   1 -13 -11  100.15    5.20
   1 -13 -11   95.00    4.97
   1 -13 -11  101.70    6.72
   1 -13 -11   78.81    6.47
   1 -13 -10    4.59    3.01
   1 -13 -10    2.87    1.68
   1 -13 -10    7.21    1.62
   1 -13 -10    5.12    1.96
   1 -13 -10    1.92    1.46
   1 -13 -10   -0.31    2.65
   1 -13 -10    2.75    2.65
   1 -13 -10    1.30    1.25
   1 -13  -9   96.84    4.97
   1 -13  -9   88.65    6.56
   1 -13  -9  101.07    6.78
   1 -13  -9  103.30    5.25
   1 -13  -9  103.91    5.22
   1 -13  -9   99.77    5.20
   1 -13  -9  101.79    5.39
   1 -13  -9   95.44    5.09
   1 -13  -9   95.57    6.79
   1 -13  -9   88.09    6.87
   1 -13  -8   11.14    3.16
   1 -13  -8    9.34    1.74
   1 -13  -8    9.82    1.84
   1 -13  -8   12.08    1.89
   1 -13  -8   11.30    2.07
   1 -13  -8    9.73    1.60
   1 -13  -8   12.95    3.12
   1 -13  -8    7.00    2.74
   1 -13  -8    8.05    3.12
   1 -13  -8    8.09    1.47
   1 -13  -7   12.07    1.90
   1 -13  -7   12.95    1.68
   1 -13  -7    9.16    1.90
   1 -13  -7   10.76    2.97
   1 -13  -7   11.73    3.31
   1 -13  -6   34.62    3.74
   1 -13  -6   30.27    3.78
   1 -13  -6   23.02    2.34
   1 -13  -6   22.82    2.06
   1 -13  -6   25.86    2.38
   1 -13  -6   21.03    2.59
   1 -13  -6   32.72    3.90
   1 -13  -6   25.73    2.12
   1 -13  -6   15.84    3.72
   1 -13  -5   86.65    7.26
  -1  13   5  107.93    5.73
   1 -13  -5  104.85    5.67
   1 -13  -5  105.89    5.43
   1 -13  -5  109.57    5.52
   1 -13  -5  103.07    5.83
   1 -13  -5  111.38    5.52
   1 -13  -5  120.33    7.47
   1 -13  -5  122.52    7.44
   1 -13  -5  117.50    7.31
  -1  13   4   49.14    3.25
   1 -13  -4   58.22    4.71
   1 -13  -4   58.29    4.90
   1 -13  -4   44.46    2.82
   1 -13  -4   43.16    2.89
   1 -13  -4   40.25    3.37
   1 -13  -4   57.83    4.89
   1 -13  -4   52.19    3.01
   1 -13  -4   35.65    4.66
   1 -13  -3   67.39    6.20
  -1  13   3   79.49    4.68
   1 -13  -3   78.97    4.55
   1 -13  -3   79.77    4.24
   1 -13  -3   83.12    4.42
   1 -13  -3   74.55    4.70
   1 -13  -3   86.30    6.10
   1 -13  -3   85.21    4.35
   1 -13  -3   94.94    6.39
   1 -13  -3   97.60    6.44
  -1  13   2    1.31    1.73
   1 -13  -2    1.81    2.75
   1 -13  -2    0.77    1.76
   1 -13  -2   -0.47    1.18
   1 -13  -2    1.38    1.40
   1 -13  -2   -0.36    2.00
   1 -13  -2    0.15    1.43
   1 -13  -2    1.59    2.75
   1 -13  -2   -2.36    3.02
   1 -13  -1   29.00    4.30
  -1  13   1   38.89    2.95
   1 -13  -1   33.03    2.35
   1 -13  -1   34.50    2.71
   1 -13  -1   33.67    2.27
   1 -13  -1   36.64    2.54
   1 -13  -1   36.91    2.96
   1 -13  -1   39.53    4.17
   1 -13  -1   36.32    2.52
   1 -13  -1   41.82    4.38
   1 -13   0   -1.24    2.71
   1 -13   0    2.89    1.35
  -1  13   0    6.44    1.90
   1 -13   0    3.65    1.38
   1 -13   0    3.39    1.11
   1 -13   0    4.04    1.60
   1 -13   0    2.62    1.89
   1 -13   0    9.12    3.15
   1 -13   0    7.46    1.54
   1 -13   0    6.75    2.99
   1 -13   1   13.05    3.26
   1 -13   1   -1.03    2.79
   1 -13   1    4.76    1.51
  -1  13  -1    3.23    1.94
   1 -13   1    4.81    1.49
   1 -13   1    5.61    1.09
   1 -13   1    5.67    1.66
   1 -13   1    6.23    1.84
   1 -13   1    6.16    1.61
   1 -13   1    2.54    1.45
   1 -13   1    5.80    2.69
   1 -13   1    8.27    1.42
   1 -13   2   24.50    2.04
  -1  13  -2   24.42    2.54
   1 -13   2   22.96    2.07
   1 -13   2   20.27    2.07
   1 -13   2   20.35    2.15
  -1  13  -2   23.16    2.20
   1 -13   2   26.57    2.17
   1 -13   2   23.44    1.93
  -1  13  -3   -0.27    1.22
   1 -13   3    1.19    1.33
   1 -13   3   -0.28    1.47
  -1  13  -3   -0.18    1.69
   1 -13   3    0.57    1.47
  -1  13  -4    1.15    1.21
   1 -13   4    1.92    1.31
   1 -13   4    2.05    1.46
  -1  13  -4    0.51    1.65
   1 -13   4    1.91    1.56
   1 -13   5    1.75    1.47
  -1  13  -5   -0.04    1.11
   1 -13   5    1.54    1.23
   1 -13   5    0.45    1.38
  -1  13  -5   -0.81    1.58
   1 -13   5    0.20    1.33
   1 -13   6   11.25    1.65
  -1  13  -6    9.86    1.27
   1 -13   6   11.34    1.35
   1 -13   6   12.22    1.51
  -1  13  -6   13.17    1.68
   1 -13   6   15.02    1.58
   1 -13   7    8.24    1.46
  -1  13  -7    7.78    1.06
   1 -13   7    9.15    1.32
  -1  13  -7   11.33    1.37
   1 -13   7   10.63    1.34
   1 -13   7    9.87    1.17
   1 -13   8   24.04    1.57
  -1  13  -8   20.50    1.53
   1 -13   8   19.37    1.32
   1 -13   8   18.32    1.68
   1 -13   9    3.79    0.90
  -1  13  -9    3.21    0.72
   1 -13   9    3.40    1.00
   1 -13  10    9.95    0.92
  -1  12  21    3.60    1.20
   1 -12 -20   26.22    1.95
   1 -12 -20   31.40    1.74
   1 -12 -19    7.44    1.12
  -1  12  19   13.60    1.73
   1 -12 -19    9.43    1.31
   1 -12 -19   13.10    1.51
   1 -12 -19   10.69    1.47
   1 -12 -18    8.59    1.18
  -1  12  18    6.76    2.10
   1 -12 -18    4.40    1.76
   1 -12 -18    8.44    1.61
  -1  12  17   50.79    3.85
   1 -12 -17   50.04    3.45
   1 -12 -17   53.41    3.52
  -1  12  16    1.47    2.38
   1 -12 -16    1.69    1.65
   1 -12 -16    5.33    1.93
   1 -12 -16   -0.52    1.19
   1 -12 -15   22.12    2.30
   1 -12 -15   25.50    2.34
   1 -12 -15   22.00    1.86
   1 -12 -15   22.23    2.36
   1 -12 -15   23.87    2.46
   1 -12 -14    9.53    1.93
   1 -12 -14    9.28    2.11
   1 -12 -14   12.67    2.13
  -1  12  14    8.23    3.67
   1 -12 -14   14.44    1.53
  -1  12  13    0.59    3.26
   1 -12 -13    2.08    1.89
   1 -12 -13    2.34    2.11
   1 -12 -13    0.88    1.44
   1 -12 -13    4.17    1.25
   1 -12 -13    6.67    2.79
   1 -12 -13    4.45    1.29
   1 -12 -12   -2.65    2.47
  -1  12  12    2.15    3.14
   1 -12 -12   -2.28    1.85
   1 -12 -12    1.17    1.36
   1 -12 -12   -1.08    2.14
   1 -12 -12    0.78    1.53
   1 -12 -12   -0.28    2.48
   1 -12 -12    0.40    1.21
   1 -12 -12   -0.47    2.50
   1 -12 -12   -0.22    1.27
   1 -12 -11    4.68    2.67
   1 -12 -11    6.55    1.54
   1 -12 -11    6.17    1.79
   1 -12 -11    6.74    2.81
   1 -12 -11    9.06    1.49
   1 -12 -11    6.57    2.71
   1 -12 -11    6.04    1.36
   1 -12 -11    8.56    1.73
   1 -12 -10   36.33    2.31
   1 -12 -10   39.16    3.91
   1 -12 -10   27.80    2.43
   1 -12 -10   32.50    2.49
   1 -12 -10   33.48    2.59
   1 -12 -10   35.03    2.35
   1 -12 -10   33.10    3.88
   1 -12  -9  162.52    9.15
   1 -12  -9  160.46    7.35
   1 -12  -9  145.40    7.45
   1 -12  -9  149.96    7.46
   1 -12  -9  151.38    7.47
   1 -12  -9  152.26    7.56
   1 -12  -9  166.29    9.17
   1 -12  -9  157.97    7.37
   1 -12  -9  125.08    8.90
   1 -12  -8  174.41    9.34
   1 -12  -8  163.46    7.43
   1 -12  -8  147.62    7.55
   1 -12  -8  146.95    7.49
   1 -12  -8  146.86    7.55
   1 -12  -8  145.06    7.66
   1 -12  -8  172.61    7.48
   1 -12  -8  175.18    9.23
   1 -12  -8  130.50    9.08
   1 -12  -7   16.87    1.96
   1 -12  -7   19.18    1.78
   1 -12  -7   21.44    2.11
   1 -12  -7   21.70    2.35
   1 -12  -7   15.27    3.03
   1 -12  -7   14.18    1.62
   1 -12  -7   13.13    3.19
   1 -12  -7   25.20    3.91
   1 -12  -6    1.88    1.32
   1 -12  -6    1.85    1.50
   1 -12  -6    3.67    1.60
   1 -12  -6    1.90    2.73
   1 -12  -6    1.24    1.37
   1 -12  -6    2.87    1.21
   1 -12  -6    2.56    2.69
   1 -12  -6    1.01    2.44
   1 -12  -5   67.91    5.82
  -1  12   5   70.95    4.23
   1 -12  -5   73.56    4.22
   1 -12  -5   70.35    4.01
   1 -12  -5   96.91    6.02
   1 -12  -5   87.29    4.12
   1 -12  -5   66.99    4.36
   1 -12  -5   70.98    4.09
   1 -12  -5  103.58    6.17
   1 -12  -5  103.87    6.17
   1 -12  -4   81.97    4.21
  -1  12   4   76.97    4.35
   1 -12  -4   93.34    5.96
   1 -12  -4   93.86    6.05
   1 -12  -4   73.17    4.05
   1 -12  -4   73.54    4.36
   1 -12  -4   62.88    5.73
   1 -12  -4   77.36    5.70
   1 -12  -4   75.97    4.09
   1 -12  -3   26.37    4.05
   1 -12  -3   35.37    2.44
  -1  12   3   35.73    2.74
   1 -12  -3   33.08    2.58
   1 -12  -3   36.69    2.34
   1 -12  -3   36.79    2.90
   1 -12  -3   34.27    2.14
   1 -12  -3   38.65    4.10
   1 -12  -3   40.41    4.05
   1 -12  -3   39.08    2.45
   1 -12  -3   38.37    3.99
   1 -12  -2    6.13    1.50
  -1  12   2    5.85    1.78
   1 -12  -2    4.48    2.73
   1 -12  -2    3.13    1.56
   1 -12  -2    2.87    1.16
  -1  12   2    0.17    3.11
   1 -12  -2    4.74    1.85
   1 -12  -2    4.02    0.99
   1 -12  -2    4.03    2.92
   1 -12  -2    5.76    2.61
   1 -12  -2    3.04    1.35
   1 -12  -1   -0.67    2.78
   1 -12  -1    0.36    1.37
  -1  12   1    1.84    1.82
   1 -12  -1    2.79    1.23
   1 -12  -1    0.40    1.05
   1 -12  -1   -1.35    1.52
  -1  12   1   -1.03    3.18
   1 -12  -1    1.81    1.83
   1 -12  -1    1.03    1.44
   1 -12  -1    4.90    2.81
   1 -12  -1    0.44    2.51
   1 -12  -1    0.64    1.35
   1 -12   0   33.84    2.38
  -1  12   0   33.60    2.81
   1 -12   0   31.21    2.43
   1 -12   0   30.84    2.32
   1 -12   0   28.89    2.03
   1 -12   0   30.17    2.63
   1 -12   0   33.78    2.42
   1 -12   0   36.64    4.26
   1 -12   0   30.67    2.28
   1 -12   0   37.47    3.94
   1 -12   1   19.06    3.38
   1 -12   1   20.10    1.99
  -1  12  -1   21.80    2.49
   1 -12   1   20.63    2.02
   1 -12   1   19.61    2.01
   1 -12   1   17.77    1.59
   1 -12   1   19.69    2.14
   1 -12   1   24.08    2.09
   1 -12   1   23.36    1.90
   1 -12   1   22.51    3.32
   1 -12   1   23.51    3.61
   1 -12   2   27.51    2.32
   1 -12   2   43.07    2.71
  -1  12  -2   37.15    3.00
   1 -12   2   41.46    2.61
   1 -12   2   38.17    2.69
   1 -12   2   35.14    2.18
  -1  12  -2   34.50    2.57
   1 -12   2   46.89    2.78
   1 -12   2   37.74    2.69
   1 -12   2   30.11    4.29
   1 -12   2   29.31    3.60
  -1  12  -3    0.20    1.83
   1 -12   3   -0.20    1.51
  -1  12  -3    0.26    1.41
   1 -12   3    2.71    1.35
   1 -12   3    1.02    1.46
   1 -12   3   -0.88    1.52
   1 -12   3    2.56    3.06
   1 -12   3    0.55    1.22
  -1  12  -4    2.44    1.33
   1 -12   4    1.09    1.44
   1 -12   4    3.02    1.55
  -1  12  -4    0.90    1.75
   1 -12   4    1.36    1.62
  -1  12  -5   -0.05    1.30
   1 -12   5    2.19    1.45
   1 -12   5    0.28    1.46
  -1  12  -5    1.44    1.71
   1 -12   5    1.55    1.61
  -1  12  -6    2.79    1.29
   1 -12   6    4.66    1.42
   1 -12   6    4.14    1.49
  -1  12  -6    4.21    1.69
   1 -12   6    5.44    1.70
   1 -12   7    1.14    1.50
  -1  12  -7    1.52    1.11
   1 -12   7    0.62    1.17
   1 -12   7    0.83    1.28
  -1  12  -7    1.03    1.41
   1 -12   7    1.02    1.31
  -1  12  -8   18.85    1.57
   1 -12   8   19.80    1.63
   1 -12   8   23.16    1.77
   1 -12   8   18.15    1.97
  -1  12  -8   22.67    1.83
  -1  12  -9    1.75    0.80
   1 -12   9    0.32    0.89
   1 -12   9    0.61    1.04
   1 -12   9    0.81    1.30
  -1  12  -9    0.99    1.03
  -1  12 -10    1.73    0.59
   1 -12  10    1.56    0.69
   1 -12  10    2.49    0.86
   1 -12  10    1.54    1.07
  -1  12 -10    1.34    0.75
   1 -12  11   29.51    1.72
   1 -12  11   28.03    1.69
  -1  11  22    3.27    0.83
  -1  11  21   17.43    1.69
   1 -11 -20    1.66    0.87
   1 -11 -20    3.68    1.24
   1 -11 -20    3.97    1.19
  -1  11  20    4.69    1.49
   1 -11 -19   -0.75    0.95
   1 -11 -19    1.63    1.25
  -1  11  19    1.79    1.61
   1 -11 -19   -0.35    1.13
   1 -11 -19    1.98    1.47
   1 -11 -18   10.62    1.31
  -1  11  18   11.75    2.29
   1 -11 -18   12.73    1.81
   1 -11 -18   13.75    1.68
   1 -11 -18   12.30    1.92
  -1  11  17    9.60    2.44
   1 -11 -17   11.73    1.36
   1 -11 -17   11.55    2.04
   1 -11 -17    8.84    1.65
   1 -11 -17    8.23    1.91
  -1  11  16   11.50    2.66
   1 -11 -16   11.32    1.72
   1 -11 -16    8.86    1.97
   1 -11 -16   12.35    1.46
   1 -11 -16   13.98    2.18
   1 -11 -15    3.27    1.96
   1 -11 -15    2.26    1.47
   1 -11 -15   -0.35    1.84
   1 -11 -15    3.81    1.85
  -1  11  15   -0.69    3.69
   1 -11 -15   -1.41    2.70
   1 -11 -15   -0.90    1.19
   1 -11 -14   90.42    5.02
   1 -11 -14   88.92    4.76
   1 -11 -14   90.53    5.07
   1 -11 -14   93.21    5.05
  -1  11  14   76.79    7.28
   1 -11 -14   94.10    4.72
   1 -11 -13   64.41    5.34
   1 -11 -13   66.13    3.67
   1 -11 -13   68.53    3.70
   1 -11 -13   66.64    4.00
   1 -11 -13   73.38    4.11
   1 -11 -13   61.93    3.65
   1 -11 -13   69.52    3.54
  -1  11  13   59.01    5.92
   1 -11 -12    5.01    1.29
   1 -11 -12    6.68    2.70
   1 -11 -12    6.24    1.28
   1 -11 -12    3.62    1.73
   1 -11 -12    4.20    2.19
   1 -11 -12    5.47    1.56
   1 -11 -12    6.27    2.54
   1 -11 -12    7.59    1.30
  -1  11  12    9.00    3.57
   1 -11 -12    5.18    2.59
   1 -11 -11    2.51    2.65
  -1  11  11    1.81    3.01
   1 -11 -11   -1.24    1.63
   1 -11 -11    0.23    1.35
   1 -11 -11   -0.53    2.17
   1 -11 -11    2.36    1.50
   1 -11 -11    2.03    1.56
   1 -11 -11   -1.97    2.40
   1 -11 -11   -0.92    1.19
   1 -11 -11    0.52    1.18
   1 -11 -11    1.04    2.37
   1 -11 -10    2.95    2.64
  -1  11  10    2.05    2.72
   1 -11 -10    0.24    1.34
   1 -11 -10    3.64    1.69
   1 -11 -10    1.34    1.21
   1 -11 -10    3.04    2.29
   1 -11 -10    0.17    1.17
   1 -11 -10    2.88    2.23
   1 -11 -10    3.37    1.47
   1 -11  -9  119.87    6.92
   1 -11  -9  112.11    5.15
   1 -11  -9   98.96    5.25
  -1  11   9   92.62    6.46
   1 -11  -9   93.11    6.71
   1 -11  -9   98.42    5.12
   1 -11  -9  101.41    5.35
   1 -11  -9  118.87    6.81
   1 -11  -9  106.57    5.13
   1 -11  -9   97.74    5.26
   1 -11  -8   15.13    1.48
   1 -11  -8   14.85    2.83
   1 -11  -8   11.40    1.49
   1 -11  -8    9.89    1.59
   1 -11  -8    7.05    2.91
   1 -11  -8    8.25    1.78
   1 -11  -8   14.82    1.50
   1 -11  -8   16.04    2.85
   1 -11  -8   10.70    1.71
   1 -11  -8    8.87    1.31
   1 -11  -7    3.98    2.26
   1 -11  -7    1.00    1.12
   1 -11  -7   -0.69    1.17
   1 -11  -7   -0.71    1.29
   1 -11  -7   -0.12    1.44
   1 -11  -7    0.71    1.58
   1 -11  -7    0.91    2.19
   1 -11  -7    0.16    1.18
   1 -11  -7    0.59    2.50
   1 -11  -6    4.77    1.39
   1 -11  -6    4.35    1.27
  -1  11   6    5.14    1.41
   1 -11  -6    6.43    1.28
   1 -11  -6    5.94    2.43
   1 -11  -6    9.55    1.31
   1 -11  -6    8.85    2.60
   1 -11  -5   62.35    3.36
  -1  11   5   59.37    3.46
   1 -11  -5   61.98    4.76
   1 -11  -5   57.09    3.22
   1 -11  -5   60.63    4.67
   1 -11  -5   56.12    3.25
   1 -11  -5   65.95    3.59
   1 -11  -5   64.09    5.18
   1 -11  -5   58.54    3.27
   1 -11  -5   58.93    4.67
   1 -11  -4  199.09    9.02
  -1  11   4  187.82    9.09
   1 -11  -4  206.87   10.51
   1 -11  -4  204.09   10.54
   1 -11  -4  182.07    8.86
   1 -11  -4  195.78    9.12
   1 -11  -4  179.11    8.77
   1 -11  -4  177.74   10.56
   1 -11  -4  194.51    8.89
   1 -11  -4  212.52   10.47
   1 -11  -3   84.96    4.41
  -1  11   3   77.85    4.57
   1 -11  -3   90.26    5.88
   1 -11  -3   92.41    5.90
   1 -11  -3   86.22    4.29
   1 -11  -3   79.12    4.58
   1 -11  -3   83.79    4.18
   1 -11  -3   80.90    6.06
   1 -11  -3   88.04    4.35
   1 -11  -3   92.94    5.92
   1 -11  -2    0.36    1.17
  -1  11   2    0.21    1.36
   1 -11  -2    2.78    2.32
   1 -11  -2    1.59    1.02
   1 -11  -2    0.28    1.36
   1 -11  -2    0.47    1.67
   1 -11  -2    0.84    0.79
   1 -11  -2    1.83    1.27
   1 -11  -2    1.50    2.81
   1 -11  -2   -0.66    2.21
   1 -11  -2    1.08    1.19
   1 -11  -1   20.51    3.44
   1 -11  -1   28.64    2.09
  -1  11   1   28.24    2.36
   1 -11  -1   24.63    1.94
   1 -11  -1   26.46    2.09
   1 -11  -1   26.53    1.83
   1 -11  -1   27.34    2.32
  -1  11   1   22.49    3.97
   1 -11  -1   26.03    2.10
   1 -11  -1   34.60    3.62
   1 -11  -1   30.92    3.41
   1 -11  -1   26.90    1.99
   1 -11   0   29.64    3.90
   1 -11   0   33.59    2.35
  -1  11   0   34.97    2.74
   1 -11   0   37.65    2.48
   1 -11   0   32.08    2.33
   1 -11   0   30.59    2.09
  -1  11   0   23.00    4.14
   1 -11   0   34.38    2.61
   1 -11   0   31.28    2.40
   1 -11   0   35.20    3.89
   1 -11   0   39.46    3.76
   1 -11   0   37.18    2.28
   1 -11   1  206.99   12.76
   1 -11   1  247.24   11.40
  -1  11  -1  258.94   11.77
   1 -11   1  242.56   11.37
   1 -11   1  238.60   11.38
   1 -11   1  225.37   11.14
  -1  11  -1  176.97   12.77
   1 -11   1  245.02   11.45
   1 -11   1  250.86   11.43
   1 -11   1  275.90   13.29
   1 -11   1  267.05   11.28
   1 -11   1  277.65   12.96
   1 -11   2    4.45    2.74
   1 -11   2    6.67    1.53
  -1  11  -2    7.40    2.09
   1 -11   2    7.54    1.59
   1 -11   2    6.30    1.09
   1 -11   2    7.03    1.50
  -1  11  -2    5.04    1.54
  -1  11  -2    4.20    3.31
   1 -11   2    6.45    1.72
   1 -11   2    3.76    1.49
   1 -11   2    7.72    1.39
   1 -11   2    6.21    2.60
   1 -11   2    9.57    3.13
   1 -11   3  129.02    6.39
   1 -11   3  130.80    6.22
  -1  11  -3  122.23    6.39
  -1  11  -3   99.56    7.63
   1 -11   3  121.53    6.24
   1 -11   3  128.48    6.34
  -1  11  -3  124.90    6.69
   1 -11   3  121.13    7.51
   1 -11   3  130.61    6.12
   1 -11   4   12.30    1.81
  -1  11  -4   13.32    1.82
  -1  11  -4   15.48    2.20
   1 -11   4   13.32    1.91
   1 -11   5    2.71    1.57
  -1  11  -5    7.11    1.54
  -1  11  -5    3.65    1.92
   1 -11   5    4.77    1.68
   1 -11   6   29.52    2.31
  -1  11  -6   27.03    2.28
  -1  11  -6   26.04    2.57
   1 -11   6   28.07    2.46
   1 -11   7    9.46    1.71
  -1  11  -7    8.61    1.48
  -1  11  -7   11.50    1.92
   1 -11   7    9.18    1.89
   1 -11   8    4.77    1.75
   1 -11   8    3.58    1.42
  -1  11  -8    4.98    1.30
  -1  11  -8    7.14    1.69
   1 -11   8    5.86    1.32
   1 -11   9   35.75    2.30
  -1  11  -9   33.24    2.40
  -1  11  -9   33.84    2.20
   1 -11   9   33.04    2.54
  -1  11 -10    2.56    0.94
  -1  11 -10    1.80    1.11
   1 -11  10    2.03    1.13
   1 -11  10    1.21    1.02
   1 -11  10    1.56    1.35
   1 -11  11    2.42    0.92
   1 -11  11    1.92    0.86
  -1  11 -11    0.96    0.72
  -1  11 -11    2.18    0.85
  -1  11 -12    5.12    0.67
   1 -11  12    6.80    0.92
  -1  10  22   15.98    1.35
   1 -10 -21   37.91    2.27
  -1  10  21   37.77    2.54
  -1  10  20   25.01    2.21
   1 -10 -20   32.34    2.19
   1 -10 -20   29.64    2.15
   1 -10 -20   32.36    1.88
  -1  10  19   10.45    1.84
   1 -10 -19   11.26    1.78
   1 -10 -19    9.34    1.22
   1 -10 -19   11.08    1.65
   1 -10 -18    9.50    1.37
  -1  10  18   10.27    2.31
   1 -10 -18   10.24    1.78
   1 -10 -18   12.75    1.77
   1 -10 -18   12.80    1.93
  -1  10  17    1.72    2.41
   1 -10 -17   -0.47    1.14
   1 -10 -17    2.32    1.85
   1 -10 -17    0.84    1.54
   1 -10 -17    0.73    1.75
   1 -10 -16    1.87    1.93
   1 -10 -16   -0.11    1.17
   1 -10 -16   -1.08    2.60
  -1  10  16    2.47    2.54
  -1  10  16    1.68    3.77
   1 -10 -16    2.93    1.62
   1 -10 -16    1.11    1.88
   1 -10 -15   28.35    2.23
   1 -10 -15   25.98    2.49
   1 -10 -15   27.88    2.51
  -1  10  15   23.51    3.01
  -1  10  15   20.21    4.87
   1 -10 -15   25.14    3.54
   1 -10 -15   24.33    2.03
   1 -10 -14   24.13    2.47
   1 -10 -14   27.55    2.16
   1 -10 -14   20.72    1.94
   1 -10 -14   18.30    3.23
   1 -10 -14   25.63    2.47
   1 -10 -14   25.33    2.43
  -1  10  14   19.68    4.59
   1 -10 -13   17.86    1.83
   1 -10 -13   17.00    2.22
   1 -10 -13   15.96    1.67
   1 -10 -13   19.40    3.23
   1 -10 -13   19.13    2.39
  -1  10  13   14.40    4.17
   1 -10 -12   53.47    3.56
   1 -10 -12   53.07    3.09
   1 -10 -12   54.54    3.38
   1 -10 -12   56.52    3.06
   1 -10 -12   57.72    4.61
   1 -10 -12   50.22    3.06
   1 -10 -12   55.23    2.95
   1 -10 -12   52.96    4.25
  -1  10  12   51.57    5.40
   1 -10 -12   41.54    4.14
   1 -10 -11   50.53    3.55
   1 -10 -11   49.77    3.03
   1 -10 -11   50.57    3.28
   1 -10 -11   69.77    3.19
   1 -10 -11   72.42    4.87
   1 -10 -11   51.95    3.20
   1 -10 -11   60.54    4.45
   1 -10 -11   60.51    3.06
   1 -10 -11   36.56    4.16
  -1  10  11   36.99    4.84
   1 -10 -10  293.86   13.89
   1 -10 -10  284.86   13.83
   1 -10 -10  295.03   13.93
   1 -10 -10  301.26   13.91
   1 -10 -10  256.68   15.00
  -1  10  10  271.50   15.35
   1 -10 -10  356.96   15.40
   1 -10 -10  324.35   13.81
   1 -10 -10  329.67   15.48
   1 -10 -10  316.01   13.83
   1 -10  -9   76.09    4.32
   1 -10  -9   75.73    4.28
   1 -10  -9   93.04    4.26
   1 -10  -9  101.08    5.87
   1 -10  -9   80.47    4.38
   1 -10  -9   92.76    5.72
   1 -10  -9   90.26    4.24
   1 -10  -9   77.77    4.19
  -1  10   9   77.43    5.64
   1 -10  -9   78.32    5.68
   1 -10  -8  101.69    4.73
   1 -10  -8   85.32    4.61
   1 -10  -8   88.42    4.59
   1 -10  -8   77.02    4.44
   1 -10  -8   80.64    5.77
   1 -10  -8  111.05    4.81
   1 -10  -8   80.38    4.45
   1 -10  -8   85.55    5.75
   1 -10  -8  101.97    4.55
   1 -10  -8   96.31    6.18
  -1  10   8   96.57    5.86
  -1  10   7  102.00    6.43
   1 -10  -7   96.79    6.86
   1 -10  -7  111.01    5.57
   1 -10  -7  116.02    5.52
   1 -10  -7  123.33    6.96
   1 -10  -7  115.76    5.70
   1 -10  -7  113.60    5.49
   1 -10  -7  121.62    6.87
   1 -10  -7  115.69    5.66
   1 -10  -6   26.95    2.12
   1 -10  -6   27.10    1.89
   1 -10  -6   30.30    3.11
   1 -10  -6   28.93    1.92
   1 -10  -5   13.64    1.37
   1 -10  -5   10.58    1.32
   1 -10  -5   11.17    2.40
   1 -10  -4   -0.15    1.34
   1 -10  -4    0.77    2.36
   1 -10  -4    1.32    1.98
   1 -10  -4    2.74    1.04
   1 -10  -4   -0.81    1.92
   1 -10  -4    1.01    2.04
   1 -10  -4    1.23    1.06
   1 -10  -3  193.59    8.86
   1 -10  -3  184.03    8.67
   1 -10  -3  192.31    9.99
   1 -10  -3  173.11   10.11
   1 -10  -3  187.97   10.00
   1 -10  -2    1.09    1.94
   1 -10  -2    1.22    1.42
   1 -10  -2    1.02    1.10
   1 -10  -2    0.80    1.09
   1 -10  -2   -0.11    2.02
   1 -10  -2    0.26    2.43
  -1  10   2    1.63    1.37
   1 -10  -1   18.74    3.09
   1 -10  -1   18.61    1.62
  -1  10   1   19.40    1.94
   1 -10  -1   17.80    1.61
   1 -10  -1   20.68    1.88
   1 -10  -1   14.50    1.58
   1 -10  -1   10.46    2.61
   1 -10  -1    9.80    1.44
   1 -10  -1   13.05    2.63
   1 -10   0   -0.94    2.33
   1 -10   0    1.48    1.16
  -1  10   0    1.62    1.60
   1 -10   0    1.77    1.07
   1 -10   0   -0.11    1.19
   1 -10   0    1.04    0.88
  -1  10   0   -0.17    3.09
   1 -10   0    0.04    1.36
   1 -10   0    0.04    1.15
   1 -10   0    1.71    2.22
   1 -10   0    1.18    1.07
   1 -10   0    0.35    2.14
   1 -10   1   20.52    1.64
   1 -10   1   23.27    3.02
  -1  10  -1   16.94    2.14
   1 -10   1   17.55    1.75
   1 -10   1   16.78    1.69
   1 -10   1   18.42    1.42
   1 -10   1   18.48    1.95
  -1  10  -1   13.74    3.76
   1 -10   1   18.36    1.74
   1 -10   1   26.08    3.21
   1 -10   1   14.77    3.01
  -1  10  -2   12.98    1.99
   1 -10   2    8.57    1.47
  -1  10  -2   10.22    1.54
   1 -10   2    9.12    1.50
   1 -10   2   10.49    1.17
   1 -10   2   10.58    1.72
  -1  10  -2   12.99    3.70
   1 -10   2   11.09    1.54
   1 -10   2   14.78    2.66
   1 -10   2   13.14    1.37
   1 -10   2   11.17    2.83
  -1  10  -3   -0.57    1.89
   1 -10   3    0.54    1.37
   1 -10   3    1.51    1.25
  -1  10  -3    0.05    1.30
  -1  10  -3    3.37    3.09
   1 -10   3    0.50    1.43
   1 -10   3   -0.09    1.36
   1 -10   3    0.60    1.16
   1 -10   3    0.47    2.24
   1 -10   3   -0.41    2.44
  -1  10  -4   21.69    2.20
  -1  10  -4   23.65    3.87
   1 -10   4   25.00    2.09
   1 -10   4   21.16    2.13
  -1  10  -4   23.57    2.56
  -1  10  -5    7.96    1.69
  -1  10  -5    3.27    2.72
   1 -10   5    9.89    1.61
  -1  10  -5    8.49    2.02
   1 -10   5    6.94    1.73
   1 -10   6    1.50    1.48
  -1  10  -6   -0.06    1.86
  -1  10  -6    1.66    1.51
   1 -10   6    1.51    1.66
   1 -10   7   13.18    1.76
  -1  10  -7   12.19    2.12
  -1  10  -7    9.94    1.74
   1 -10   7   10.00    1.94
   1 -10   8    2.82    1.45
  -1  10  -8    0.34    1.75
  -1  10  -8    1.73    1.45
   1 -10   8    1.36    1.74
   1 -10   9   68.55    3.73
  -1  10  -9   66.45    3.87
  -1  10  -9   66.70    3.70
   1 -10   9   60.57    3.87
  -1  10 -10   46.48    2.83
  -1  10 -10   47.90    2.97
   1 -10  10   50.38    2.92
  -1  10 -11    1.04    0.97
  -1  10 -11    1.72    1.16
   1 -10  11    1.05    1.07
   1 -10  12    3.81    0.98
  -1  10 -12    2.98    0.85
   1 -10  12    2.03    1.17
  -1  10 -12    3.88    0.97
  -1  10 -13    1.82    0.56
  -1  10 -13    1.86    0.65
   1 -10  13    1.55    0.85
   1 -10  13    1.70    0.59
   1  -9 -22    0.31    0.85
  -1   9  22    1.80    1.01
   1  -9 -21   21.51    1.68
   1  -9 -21   20.93    1.75
   1  -9 -21   21.82    1.44
  -1   9  21   22.16    1.98
   1  -9 -20   -0.49    1.36
   1  -9 -20    0.67    0.91
   1  -9 -20    0.61    1.38
   1  -9 -19   38.79    2.66
   1  -9 -19   39.39    2.79
   1  -9 -19   38.44    2.73
   1  -9 -19   42.07    2.42
   1  -9 -18    4.77    1.87
   1  -9 -18    4.40    1.66
  -1   9  18    6.11    2.13
   1  -9 -17   26.86    2.58
   1  -9 -17   27.15    2.33
   1  -9 -16   57.03    3.57
   1  -9 -16   52.83    3.35
  -1   9  16   53.98    4.01
   1  -9 -16   53.29    3.60
  -1   9  16   42.57    5.82
   1  -9 -15  111.81    5.81
   1  -9 -15  110.85    5.65
  -1   9  15   99.70    6.02
   1  -9 -15  117.88    5.90
  -1   9  15   90.55    8.13
   1  -9 -14  155.65    7.69
   1  -9 -14  159.32    7.78
   1  -9 -14  170.11    7.93
   1  -9 -14  159.11    7.88
   1  -9 -13   60.59    3.49
   1  -9 -13   60.71    3.75
   1  -9 -13   65.47    3.79
  -1   9  13   56.52    5.87
   1  -9 -13   62.70    3.79
   1  -9 -12   21.10    2.19
   1  -9 -12   22.56    1.81
   1  -9 -12   19.83    2.05
   1  -9 -12   16.88    2.57
   1  -9 -12   20.72    1.69
   1  -9 -12   16.79    1.48
  -1   9  12   20.35    4.18
   1  -9 -12   18.28    2.73
   1  -9 -11   18.31    2.15
   1  -9 -11   14.94    1.54
   1  -9 -11   14.64    1.79
   1  -9 -11   17.05    1.56
   1  -9 -11   17.85    1.65
   1  -9 -11   22.61    2.73
   1  -9 -11   19.38    1.51
  -1   9  11   18.11    3.70
   1  -9 -11   18.00    2.69
  -1   9  10   20.97    3.62
   1  -9 -10   20.42    2.93
   1  -9 -10   21.45    1.99
   1  -9 -10   20.97    1.95
   1  -9 -10   24.81    1.97
   1  -9 -10   34.01    3.15
   1  -9 -10   28.64    1.85
   1  -9 -10   29.70    3.06
   1  -9 -10   27.93    1.79
   1  -9  -9   15.14    1.58
   1  -9  -9   12.52    2.33
   1  -9  -9   14.38    1.32
   1  -9  -9   12.55    2.63
  -1   9   9   13.47    2.92
   1  -9  -9   14.92    2.48
   1  -9  -9   11.05    1.30
   1  -9  -8   -0.13    1.24
   1  -9  -8    0.44    1.69
   1  -9  -8    1.68    0.98
   1  -9  -8    2.02    2.22
  -1   9   8    2.23    2.29
   1  -9  -8    1.69    1.95
   1  -9  -8    1.72    0.97
   1  -9  -7   36.82    2.34
   1  -9  -7   41.46    3.33
   1  -9  -7   35.99    2.17
   1  -9  -7   34.59    3.43
  -1   9   7   34.61    3.25
   1  -9  -7   37.09    3.35
   1  -9  -7   33.28    2.13
   1  -9  -6  401.26   16.74
   1  -9  -6  378.79   17.81
   1  -9  -6  360.32   16.57
  -1   9   6  358.51   17.39
   1  -9  -6  375.21   17.93
   1  -9  -6  352.92   16.56
  -1   9   5    3.72    1.78
   1  -9  -5    5.00    1.96
   1  -9  -5    2.21    1.05
   1  -9  -4   99.33    5.46
   1  -9  -4   96.92    6.65
   1  -9  -3  102.77    5.09
   1  -9  -3   90.92    6.19
   1  -9  -3   99.92    4.95
   1  -9  -2  391.95   17.79
   1  -9  -2  418.35   18.96
   1  -9  -2  360.71   18.92
   1  -9  -2  390.64   17.65
   1  -9  -2  414.12   18.83
   1  -9  -1   10.66    1.48
   1  -9  -1   15.50    2.48
   1  -9  -1   10.10    2.58
   1  -9  -1   10.67    1.24
   1  -9  -1   10.06    2.31
   1  -9   0   41.80    2.60
   1  -9   0   40.96    3.55
   1  -9   0   44.06    2.43
   1  -9   0   41.47    3.59
   1  -9   0   45.08    3.93
   1  -9   1   35.00    2.27
   1  -9   1   37.88    2.14
   1  -9   1   35.46    3.26
   1  -9   1   32.33    3.54
   1  -9   1   34.12    2.36
  -1   9  -1   34.28    4.39
  -1   9  -2   15.30    1.98
   1  -9   2   18.29    1.60
  -1   9  -2   14.41    3.98
   1  -9   2   19.63    1.72
   1  -9   2   14.81    1.56
   1  -9   2   15.70    2.79
   1  -9   2   13.75    2.57
   1  -9   2   13.87    1.43
  -1   9  -3    9.93    1.93
   1  -9   3   11.16    1.32
  -1   9  -3    8.98    1.55
   1  -9   3    9.08    1.47
  -1   9  -3   14.14    3.89
   1  -9   3   11.64    1.47
   1  -9   3    8.90    2.51
   1  -9   3   11.12    2.37
   1  -9   3    9.42    1.23
   1  -9   4   49.65    2.93
  -1   9  -4   52.11    4.90
  -1   9  -4   43.41    3.29
  -1   9  -4   46.41    3.04
  -1   9  -5   11.28    1.71
  -1   9  -5   11.75    3.31
   1  -9   5   11.68    1.71
   1  -9   5   13.49    1.78
  -1   9  -5   15.66    2.16
   1  -9   6   13.15    1.82
   1  -9   6    9.12    1.70
  -1   9  -6    8.96    3.14
   1  -9   6   10.98    1.65
  -1   9  -6   10.05    1.75
   1  -9   6    9.81    1.11
  -1   9  -6    9.11    2.11
   1  -9   7  181.14    9.25
  -1   9  -7  209.79    9.35
   1  -9   7  204.86    9.31
  -1   9  -7  168.86   10.49
   1  -9   7  201.39    9.24
   1  -9   7  177.11    8.77
  -1   9  -7  213.50    9.54
   1  -9   8   79.24    4.68
  -1   9  -8   86.80    4.67
   1  -9   8   87.21    4.67
   1  -9   8   87.97    4.63
  -1   9  -8   91.59    4.94
   1  -9   8   84.66    4.14
   1  -9   9   66.74    3.71
   1  -9   9   66.22    3.77
  -1   9  -9   68.32    3.79
  -1   9  -9   71.33    3.96
   1  -9  10   30.32    2.29
  -1   9 -10   26.34    2.43
  -1   9 -10   27.12    2.20
  -1   9 -11   40.35    2.43
   1  -9  11   31.77    2.24
  -1   9 -11   36.67    2.59
   1  -9  11   39.50    2.72
   1  -9  11   40.89    2.54
  -1   9 -12    1.40    1.09
  -1   9 -12    0.88    1.21
   1  -9  12    1.29    1.37
   1  -9  12    1.21    1.16
  -1   9 -13   12.32    1.15
   1  -9  13   11.69    1.24
  -1   9 -13   10.90    1.19
   1  -9  13   11.87    1.37
   1  -9  14    2.34    0.70
  -1   9 -14    2.12    0.69
  -1   9 -14    1.94    0.61
  -1   8  22    0.80    1.01
   1  -8 -21   15.39    1.56
   1  -8 -21   19.04    1.32
  -1   8  21   17.34    1.89
   1  -8 -20    6.08    1.57
  -1   8  20    9.31    2.11
   1  -8 -19    5.54    1.85
  -1   8  18   27.70    2.67
   1  -8 -18   25.10    2.58
   1  -8 -18   28.98    2.46
   1  -8 -17    0.29    1.62
   1  -8 -17    0.93    1.94
  -1   8  17    1.06    2.39
   1  -8 -16  186.19    8.81
   1  -8 -16  192.34    8.89
  -1   8  16  160.41    8.97
  -1   8  16  157.33   11.20
   1  -8 -16  183.31    8.76
  -1   8  15    5.67    2.51
  -1   8  15    3.80    4.06
   1  -8 -15    5.52    1.89
   1  -8 -15    5.00    1.89
   1  -8 -14  120.60    6.06
  -1   8  14  106.41    8.35
  -1   8  14  112.49    6.33
   1  -8 -14  114.60    5.97
   1  -8 -14  121.88    6.12
   1  -8 -13   24.76    2.29
   1  -8 -13   23.08    2.26
  -1   8  13   22.55    4.43
   1  -8 -13   28.96    2.40
   1  -8 -12   81.13    4.39
   1  -8 -12   84.81    4.45
   1  -8 -12   76.27    4.93
  -1   8  12   83.80    6.57
   1  -8 -11    1.80    1.34
   1  -8 -11    3.79    1.71
   1  -8 -11    3.74    1.12
   1  -8 -11    3.41    1.96
  -1   8  11    2.58    3.16
   1  -8 -11    2.94    0.94
   1  -8 -11    3.14    1.80
   1  -8 -10   78.48    3.83
   1  -8 -10   68.21    3.88
   1  -8 -10   70.51    4.83
  -1   8  10   79.30    5.70
   1  -8 -10   80.93    4.81
   1  -8 -10   71.88    3.67
  -1   8   9   56.40    4.55
   1  -8  -9   52.73    4.02
   1  -8  -9   54.85    2.84
   1  -8  -9   52.71    3.92
   1  -8  -9   52.12    2.97
   1  -8  -8    2.31    1.00
   1  -8  -8    2.54    1.75
  -1   8   8    7.47    2.66
   1  -8  -8   10.28    2.35
   1  -8  -8    3.19    0.94
   1  -8  -8    3.17    1.89
   1  -8  -8    7.92    1.25
   1  -8  -7    2.59    0.98
   1  -8  -7    4.11    1.90
  -1   8   7    3.13    2.23
   1  -8  -7    0.10    2.24
   1  -8  -7    2.23    0.95
   1  -8  -7    2.75    1.97
   1  -8  -7    0.70    1.20
   1  -8  -6   34.23    1.94
   1  -8  -6   39.25    3.07
  -1   8   6   24.40    2.93
   1  -8  -6   24.46    3.13
   1  -8  -6   27.15    2.04
   1  -8  -5   12.42    1.33
   1  -8  -5   13.55    2.30
  -1   8   5   11.71    2.25
   1  -8  -4   29.40    2.83
   1  -8  -4   25.17    1.62
  -1   8   4   16.37    2.31
   1  -8  -4   13.29    2.92
   1  -8  -3  254.82   11.56
   1  -8  -3  228.68   12.69
   1  -8  -3  254.33   11.68
   1  -8  -2  135.82    7.47
   1  -8  -2  130.00    7.64
   1  -8  -2  140.73    6.57
   1  -8  -1   40.90    3.66
   1  -8  -1   42.63    2.41
   1  -8   0   21.97    2.81
   1  -8   0   30.03    1.93
   1  -8   0   26.00    3.01
   1  -8   0   23.30    1.65
   1  -8   0   22.50    2.63
   1  -8   1  201.62    8.83
  -1   8  -1  184.29   10.74
   1  -8   1  178.79    9.83
   1  -8   1  182.75    8.68
   1  -8   1  193.76    9.75
   1  -8   2  156.68    7.45
  -1   8  -2  136.04    9.30
   1  -8   2  159.98    7.32
   1  -8   2  171.64    8.44
   1  -8   2  153.34    8.50
   1  -8   3    1.72    1.15
  -1   8  -3    4.54    3.59
   1  -8   3    1.59    1.10
   1  -8   3    2.30    1.80
   1  -8   3    2.08    0.95
   1  -8   3    1.16    2.03
   1  -8   4   86.95    6.00
  -1   8  -4   99.11    5.26
  -1   8  -4   84.51    6.94
   1  -8   4  110.15    5.19
   1  -8   4  118.88    6.14
   1  -8   4  102.96    4.80
  -1   8  -4  103.46    5.46
   1  -8   5    0.26    1.26
  -1   8  -5    0.61    1.31
   1  -8   5    1.93    1.26
   1  -8   5    1.42    0.80
  -1   8  -5   -0.58    1.71
   1  -8   6   12.57    1.68
  -1   8  -6   15.23    1.81
  -1   8  -6   12.04    3.45
   1  -8   6   14.66    1.68
   1  -8   6   10.99    1.18
  -1   8  -6   15.76    2.13
  -1   8  -7   27.40    2.24
   1  -8   7   25.44    2.26
  -1   8  -7   20.42    3.68
   1  -8   7   25.37    2.21
   1  -8   7   26.03    1.75
  -1   8  -7   27.36    2.48
  -1   8  -8  190.86    8.78
   1  -8   8  182.77    8.76
  -1   8  -8  158.89   10.00
   1  -8   8  178.81    8.72
   1  -8   8  171.61    8.33
  -1   8  -8  198.36    9.03
  -1   8  -9  166.93    7.65
   1  -8   9  159.24    7.63
   1  -8   9  157.07    7.58
  -1   8  -9  165.60    8.95
   1  -8   9  141.62    7.20
  -1   8  -9  169.61    7.85
   1  -8  10   22.82    2.21
  -1   8 -10   23.91    2.18
  -1   8 -10   22.83    2.29
   1  -8  10   28.76    2.26
   1  -8  10   24.60    1.74
   1  -8  10   22.21    2.35
   1  -8  11    3.72    1.51
  -1   8 -11    1.77    1.43
  -1   8 -11    5.03    1.69
   1  -8  11    3.88    1.74
   1  -8  11    2.86    1.49
   1  -8  12    4.85    1.36
  -1   8 -12    1.68    1.46
   1  -8  12    4.41    1.55
  -1   8 -12    5.14    1.35
   1  -8  12    3.43    1.42
   1  -8  13   26.78    1.95
  -1   8 -13   27.17    1.99
   1  -8  13   28.02    2.08
  -1   8 -13   24.76    1.89
   1  -8  14    0.82    0.95
  -1   8 -14    0.16    0.95
  -1   8 -14    0.40    0.88
  -1   8 -15    0.17    0.67
  -1   8 -15    0.36    0.58
  -1   7  22   18.11    1.50
   1  -7 -22   16.58    1.33
   1  -7 -22   19.77    1.49
  -1   7  21    0.66    1.53
   1  -7 -21    1.25    1.13
   1  -7 -21    0.44    1.25
  -1   7  20    2.83    1.97
   1  -7 -20    2.72    1.56
   1  -7 -20    2.83    1.55
   1  -7 -19   16.04    2.13
   1  -7 -18   37.62    3.00
   1  -7 -17  153.80    7.49
  -1   7  17  139.63    7.47
   1  -7 -16    4.00    2.04
  -1   7  16    4.04    2.45
  -1   7  15   16.55    2.87
   1  -7 -15   18.60    2.33
   1  -7 -15   19.44    2.20
  -1   7  15   15.38    4.57
  -1   7  14   14.63    2.64
  -1   7  14   18.99    4.40
   1  -7 -14   16.43    2.12
   1  -7 -14   14.57    2.11
   1  -7 -13   27.26    2.28
  -1   7  13   22.29    4.47
  -1   7  13   23.94    2.70
   1  -7 -13   26.42    2.34
   1  -7 -13   25.09    2.26
   1  -7 -12  168.50    7.90
   1  -7 -12  156.59    7.81
  -1   7  12  148.92    9.69
   1  -7 -12  165.91    7.81
   1  -7 -11    3.78    1.27
  -1   7  11    4.33    3.11
   1  -7 -11    1.43    1.61
   1  -7 -11    3.86    1.67
   1  -7 -10   26.17    2.78
  -1   7  10   25.44    3.76
   1  -7 -10   34.61    1.84
   1  -7 -10   36.30    2.88
   1  -7 -10   27.94    1.90
   1  -7  -9  438.87   20.39
  -1   7   9  441.98   20.89
   1  -7  -9  403.02   19.37
   1  -7  -9  414.21   20.22
   1  -7  -9  487.28   19.52
   1  -7  -8  129.71    7.11
  -1   7   8  133.29    7.46
   1  -7  -8  120.94    6.01
   1  -7  -8  132.21    6.94
   1  -7  -8  141.95    6.18
   1  -7  -7   36.73    3.33
  -1   7   7   36.56    3.49
   1  -7  -7   27.67    1.93
   1  -7  -7   33.26    3.02
   1  -7  -7   39.30    2.15
   1  -7  -6    2.15    2.25
  -1   7   6    2.81    2.22
   1  -7  -6   -1.01    1.87
   1  -7  -6   -0.48    1.02
   1  -7  -6    0.82    1.13
  -1   7   5   32.55    3.03
   1  -7  -5   31.14    3.46
   1  -7  -5   33.52    2.01
   1  -7  -5   36.38    3.00
   1  -7  -5   35.27    2.18
  -1   7   4  145.22    7.56
   1  -7  -4  150.35    6.98
   1  -7  -4  164.62    8.00
   1  -7  -3 1113.76   48.75
  -1   7   3 1082.20   48.12
   1  -7  -3 1036.68   47.73
   1  -7  -3 1130.81   47.84
   1  -7  -2  152.28    7.99
   1  -7  -2  150.93    7.83
   1  -7  -2  135.77    6.83
   1  -7  -2  166.05    7.00
   1  -7  -1  130.53    7.22
   1  -7  -1  141.17    6.23
   1  -7   0   28.63    3.21
   1  -7   0   30.05    1.92
   1  -7   1   16.42    1.53
   1  -7   1   16.72    2.76
   1  -7   1   13.74    1.27
   1  -7   1   15.31    2.30
  -1   7  -2   12.35    3.71
   1  -7   2   14.07    1.45
   1  -7   2    9.87    2.41
   1  -7   2   15.76    1.29
   1  -7   2   15.09    2.31
  -1   7  -3   21.32    4.26
   1  -7   3   23.98    1.68
   1  -7   3   23.89    2.68
   1  -7   3   21.10    1.32
   1  -7   3   23.59    1.53
   1  -7   3   23.35    2.50
  -1   7  -4   28.05    4.32
   1  -7   4   37.15    2.89
   1  -7   4   31.92    1.76
   1  -7   4   29.15    2.94
   1  -7   5   74.52    4.70
  -1   7  -5   74.93    4.16
   1  -7   5   79.61    4.13
  -1   7  -5   80.85    6.07
   1  -7   5   82.08    4.13
   1  -7   5   78.26    3.79
  -1   7  -5   80.70    4.41
   1  -7   6  133.35    7.98
  -1   7  -6  135.81    6.56
   1  -7   6  128.46    6.50
  -1   7  -6  137.04    8.34
   1  -7   6  137.16    6.50
   1  -7   6  128.45    6.16
  -1   7  -6  133.58    6.74
   1  -7   7    2.49    1.36
  -1   7  -7    0.79    3.06
  -1   7  -7    1.68    1.37
   1  -7   7    0.96    1.40
   1  -7   7    0.61    0.98
  -1   7  -7    2.77    1.65
  -1   7  -8   68.43    3.94
   1  -7   8   68.70    3.93
  -1   7  -8   56.96    5.39
   1  -7   8   70.49    3.93
   1  -7   8   68.23    3.56
  -1   7  -8   75.69    4.20
   1  -7   9    0.25    1.52
  -1   7  -9    2.22    2.45
   1  -7   9   -1.55    1.55
  -1   7  -9    1.04    1.52
   1  -7   9    1.31    1.17
  -1   7  -9    1.57    1.83
  -1   7 -10   10.38    2.04
   1  -7  10   11.94    1.92
   1  -7  10   10.16    1.84
  -1   7 -10   12.97    1.83
  -1   7 -10   10.93    2.61
   1  -7  10   10.81    1.83
   1  -7  10   13.39    1.45
   1  -7  10   10.03    1.37
   1  -7  11    3.36    1.52
  -1   7 -11    5.68    1.82
  -1   7 -11    3.92    1.44
   1  -7  11    1.73    1.58
   1  -7  11    5.19    1.75
   1  -7  11    6.25    1.29
   1  -7  12   11.91    1.73
  -1   7 -12   11.65    1.82
   1  -7  12   10.42    1.73
  -1   7 -12   11.00    1.66
   1  -7  12   10.05    1.83
   1  -7  12   11.06    1.36
   1  -7  13   20.45    1.89
  -1   7 -13   19.58    1.90
  -1   7 -13   19.80    1.77
   1  -7  13   19.42    1.84
   1  -7  13   15.19    1.89
   1  -7  14   30.86    2.06
  -1   7 -14   29.00    2.09
  -1   7 -14   29.89    1.98
   1  -7  14   27.83    2.10
  -1   7 -15   13.50    1.29
  -1   7 -15   12.94    1.25
   1  -7  15   11.25    1.08
  -1   7 -16    4.33    0.70
  -1   7 -16    3.46    0.66
  -1   6  22    2.67    1.02
   1  -6 -22    3.62    0.86
   1  -6 -22    3.68    1.02
  -1   6  21   77.58    4.16
   1  -6 -21   75.27    3.98
   1  -6 -21   79.20    4.04
  -1   6  20    1.71    1.82
   1  -6 -20   -0.50    1.55
   1  -6 -20    0.66    1.52
  -1   6  19   24.79    2.93
   1  -6 -19   30.91    2.60
   1  -6 -19   28.23    2.50
  -1   6  19   28.80    2.08
   1  -6 -18   21.88    2.28
   1  -6 -18   20.85    2.27
  -1   6  17    5.40    2.20
   1  -6 -17    4.61    1.99
  -1   6  17    4.15    1.54
  -1   6  17    2.97    3.59
  -1   6  16   -0.11    2.46
  -1   6  16    1.49    3.81
  -1   6  16    1.71    1.49
   1  -6 -16    1.90    2.03
  -1   6  15   34.33    3.19
   1  -6 -15   41.18    2.97
  -1   6  15   31.64    2.42
   1  -6 -14   88.45    4.68
  -1   6  14   84.75    7.01
  -1   6  14   76.20    5.00
  -1   6  14   84.99    4.42
   1  -6 -14   90.67    4.74
   1  -6 -13  611.69   25.75
   1  -6 -13  587.56   25.68
  -1   6  13  536.45   27.56
  -1   6  13  547.42   25.78
   1  -6 -13  562.02   25.57
  -1   6  13  555.55   25.48
   1  -6 -12  110.20    5.42
  -1   6  12   98.41    7.31
  -1   6  12  108.70    5.21
   1  -6 -12  105.94    5.46
   1  -6 -11   88.46    5.13
  -1   6  11   94.84    4.58
   1  -6 -11  100.86    5.28
  -1   6  11  107.83    6.78
   1  -6 -10   88.78    4.77
  -1   6  10   78.20    5.84
   1  -6 -10   78.58    4.76
   1  -6  -9  698.05   31.60
   1  -6  -9  776.06   32.35
   1  -6  -9  716.31   31.54
   1  -6  -9  692.63   32.35
  -1   6   9  688.19   32.88
   1  -6  -8   37.32    2.34
   1  -6  -8   37.67    3.28
  -1   6   8   43.91    4.14
   1  -6  -8   49.32    3.27
   1  -6  -8   43.39    2.25
   1  -6  -7   16.76    2.58
  -1   6   7   19.30    3.05
   1  -6  -7   19.02    1.40
   1  -6  -7   20.39    2.35
  -1   6   6  251.86   11.83
   1  -6  -6  232.53   11.73
  -1   6   5   51.89    3.47
   1  -6  -5   48.03    3.58
   1  -6  -5   46.01    2.52
   1  -6  -5   51.76    3.42
  -1   6   4  383.82   18.34
   1  -6  -4  424.75   18.62
   1  -6  -3  128.42    6.49
  -1   6   3  121.10    5.87
   1  -6  -2  307.84   14.26
  -1   6   2  293.92   13.60
   1  -6  -1   29.07    3.10
   1  -6  -1   42.47    2.98
   1  -6   0   19.71    2.84
   1  -6   1   18.10    2.80
   1  -6   1   17.84    2.49
   1  -6   2    2.05    1.97
   1  -6   2   -0.19    1.83
  -1   6  -2   -1.17    4.00
   1  -6   2    2.24    1.08
   1  -6   3  131.45    6.56
   1  -6   3  111.05    6.24
   1  -6   3  105.25    5.43
   1  -6   3  132.76    5.60
  -1   6  -3  125.81    7.90
   1  -6   4   -0.08    1.83
   1  -6   4    2.08    1.65
   1  -6   4    0.41    0.74
   1  -6   5   10.80    1.81
  -1   6  -5   15.43    3.76
   1  -6   5   14.32    2.07
   1  -6   5   10.47    1.02
   1  -6   6   83.62    5.67
   1  -6   6   87.00    4.35
  -1   6  -6   87.40    6.33
   1  -6   6   88.41    4.36
  -1   6  -6   80.63    4.55
   1  -6   6   81.36    4.05
   1  -6   7   13.32    1.59
  -1   6  -7   13.78    3.59
   1  -6   7   15.54    1.66
  -1   6  -7   14.72    1.95
   1  -6   7   16.05    1.33
   1  -6   8   70.29    3.81
  -1   6  -8   67.51    5.67
   1  -6   8   69.51    3.84
  -1   6  -8   76.77    4.11
   1  -6   8   62.69    3.49
   1  -6   9   66.92    4.02
   1  -6   9   71.20    4.04
  -1   6  -9   75.37    4.23
   1  -6   9   76.67    3.76
   1  -6  10   91.16    5.10
  -1   6 -10   81.54    6.28
   1  -6  10   97.40    5.13
  -1   6 -10  101.59    5.28
   1  -6  10  100.80    4.85
   1  -6  11    1.87    1.50
   1  -6  11    2.42    1.57
  -1   6 -11   -0.48    2.29
  -1   6 -11    2.79    1.45
   1  -6  11    1.85    1.60
   1  -6  11    2.80    1.28
  -1   6 -11    3.84    1.82
   1  -6  12   11.61    1.80
  -1   6 -12   11.15    1.89
   1  -6  12   10.20    1.80
  -1   6 -12   10.96    1.76
   1  -6  12   10.59    1.78
   1  -6  12   15.62    1.56
  -1   6 -13   32.32    2.41
   1  -6  13   32.26    2.46
  -1   6 -13   36.63    2.54
   1  -6  13   31.40    2.51
   1  -6  13   31.43    2.45
   1  -6  13   32.68    2.21
   1  -6  14   50.36    3.06
  -1   6 -14   53.83    3.05
  -1   6 -14   50.92    3.12
   1  -6  14   52.66    3.14
   1  -6  14   56.85    2.91
   1  -6  14   48.22    3.09
   1  -6  15   26.91    1.85
  -1   6 -15   26.78    1.91
   1  -6  15   19.47    1.66
   1  -6  15   24.52    1.79
  -1   6 -15   23.94    1.81
  -1   6 -16    9.76    1.12
  -1   6 -16   11.17    1.19
   1  -6  16   12.11    1.21
  -1   6 -17    2.44    0.60
  -1   6 -17    2.22    0.60
   1  -5 -22    6.08    0.94
   1  -5 -22    4.83    0.86
  -1   5  22    6.17    1.01
   1  -5 -21   -0.12    1.21
   1  -5 -21    0.68    1.17
  -1   5  21   -0.79    1.44
   1  -5 -20   35.17    2.53
  -1   5  20   34.90    2.20
   1  -5 -20   40.58    2.59
  -1   5  20   32.94    2.84
   1  -5 -19   20.63    2.17
  -1   5  19   17.83    1.76
   1  -5 -19   20.99    2.23
  -1   5  19   18.81    2.69
   1  -5 -18    6.18    1.88
  -1   5  18    7.26    1.55
   1  -5 -18    7.43    2.10
  -1   5  18    6.03    2.58
  -1   5  17    1.62    3.24
  -1   5  17    0.08    1.44
   1  -5 -17    2.40    2.06
  -1   5  16   92.93    7.78
  -1   5  16  107.97    5.54
   1  -5 -16  108.92    5.77
  -1   5  16  109.98    5.91
   1  -5 -15    8.20    2.05
  -1   5  15    5.69    2.45
  -1   5  15    6.45    1.63
  -1   5  15    7.17    3.86
   1  -5 -14    1.01    2.35
  -1   5  14    4.12    2.34
  -1   5  14   -0.25    1.34
   1  -5 -14    2.63    1.78
   1  -5 -13  102.85    5.28
   1  -5 -13   89.11    6.69
  -1   5  13   94.47    5.56
   1  -5 -13  107.53    5.35
  -1   5  13  107.67    5.14
   1  -5 -12   10.74    1.56
   1  -5 -12    6.53    2.55
   1  -5 -12    9.66    1.53
  -1   5  12   11.39    1.33
  -1   5  12    6.81    3.37
   1  -5 -11  159.72    8.79
  -1   5  11  154.07    7.21
  -1   5  11  155.94    9.10
   1  -5 -10  152.08    8.60
  -1   5  10  162.05    7.28
   1  -5 -10  177.82    7.84
  -1   5  10  151.27    8.98
   1  -5 -10  134.94    7.72
   1  -5  -9  136.14    7.50
   1  -5  -9  127.69    6.82
  -1   5   9  126.98    7.73
   1  -5  -9  139.59    6.82
   1  -5  -8  211.75    9.75
  -1   5   8  193.79   10.24
   1  -5  -8  188.79    9.57
  -1   5   7  270.49   13.52
   1  -5  -7  276.45   13.17
   1  -5  -7  283.75   13.09
   1  -5  -6   91.51    5.36
  -1   5   6   88.33    5.51
   1  -5  -5  199.52    9.55
  -1   5   5  193.26    9.52
  -1   5   4    4.84    1.55
  -1   5   3  346.55   16.40
   1  -5  -3  383.86   16.67
  -1   5   2   41.55    2.43
   1  -5  -2   43.41    3.09
   1  -5  -1  929.79   40.13
  -1   5   1  893.77   39.51
   1  -5  -1  857.47   39.95
   1  -5   0  399.87   18.48
   1  -5   1  227.14   10.95
   1  -5   2  156.90    7.94
   1  -5   2  163.12    8.10
  -1   5  -3  123.88    7.23
   1  -5   3  114.30    5.81
  -1   5  -4  591.64   27.69
   1  -5   4  654.53   26.59
   1  -5   4  559.60   25.83
   1  -5   4  638.21   26.72
   1  -5   5  330.77   15.20
   1  -5   5  338.95   15.10
   1  -5   5  310.28   14.39
   1  -5   5  337.56   15.05
   1  -5   5  334.79   15.76
  -1   5  -5  318.57   16.23
   1  -5   6    1.87    1.31
  -1   5  -6    3.06    3.17
   1  -5   6   -1.80    2.11
   1  -5   6    0.11    0.84
  -1   5  -7    1.68    3.03
   1  -5   7    1.37    0.92
   1  -5   8    1.64    1.26
  -1   5  -8    2.61    2.84
   1  -5   8    1.06    1.27
  -1   5  -8   -0.73    1.44
   1  -5   8    0.80    1.03
   1  -5   9   32.94    2.35
  -1   5  -9   26.04    3.75
   1  -5   9   32.56    2.39
  -1   5  -9   29.82    2.57
   1  -5   9   31.45    2.05
   1  -5  10   70.03    4.03
  -1   5 -10   59.52    5.28
   1  -5  10   76.25    4.12
  -1   5 -10   72.34    4.23
   1  -5  10   73.22    3.80
   1  -5  11   90.38    4.84
  -1   5 -11   76.51    6.09
   1  -5  11   86.15    4.85
  -1   5 -11   85.49    4.95
   1  -5  11   98.17    4.62
   1  -5  12   52.40    3.34
   1  -5  12   56.67    3.36
  -1   5 -12   50.61    4.59
   1  -5  12   52.74    3.45
   1  -5  12   54.24    3.11
  -1   5 -12   54.44    3.54
  -1   5 -13   15.61    1.83
   1  -5  13   14.04    1.89
  -1   5 -13   18.23    2.10
   1  -5  13   15.11    2.08
   1  -5  13   19.16    1.93
   1  -5  13   13.80    1.64
   1  -5  14    1.95    1.42
  -1   5 -14    1.38    1.55
   1  -5  14    1.28    1.50
  -1   5 -14    1.53    1.33
   1  -5  14    2.35    1.38
   1  -5  14    2.67    1.26
   1  -5  15   12.81    1.71
  -1   5 -15   14.13    1.68
   1  -5  15   12.97    1.55
  -1   5 -15   15.16    1.58
   1  -5  15   11.94    1.40
  -1   5 -16   18.32    1.57
  -1   5 -16   20.91    1.69
   1  -5  16   21.22    1.67
   1  -5  16   16.62    1.55
   1  -5  16   17.48    1.43
   1  -5  17    4.98    0.92
  -1   5 -17    3.74    0.94
   1  -5  17    2.83    0.77
  -1   5 -17    4.43    0.89
  -1   5 -18    0.07    0.48
   1  -4 -22    0.44    0.72
  -1   4  22    0.64    0.78
   1  -4 -21    8.73    1.27
   1  -4 -21    6.42    1.28
  -1   4  21    4.53    1.44
   1  -4 -20    8.64    1.60
   1  -4 -20    8.70    1.55
  -1   4  20    6.69    1.22
  -1   4  20    5.10    1.82
   1  -4 -19   16.57    1.98
   1  -4 -19   15.82    2.08
  -1   4  19   16.38    1.68
  -1   4  19   15.35    2.50
   1  -4 -18   -0.28    1.66
  -1   4  18    0.28    1.43
   1  -4 -18   -0.66    1.85
  -1   4  18    2.61    2.37
  -1   4  17   24.38    4.26
  -1   4  17   30.31    3.42
  -1   4  17   29.75    2.39
   1  -4 -17   31.39    2.80
  -1   4  16   20.67    4.17
  -1   4  16   21.96    2.16
   1  -4 -16   18.06    2.44
   1  -4 -16   18.68    3.39
  -1   4  15  214.80   12.60
   1  -4 -15  206.50   12.34
  -1   4  15  223.79   10.54
   1  -4 -15  232.45   10.77
  -1   4  14  140.76    8.86
  -1   4  14  122.36    6.97
   1  -4 -14  141.40    8.48
  -1   4  14  138.85    6.71
   1  -4 -14  145.38    6.96
  -1   4  13   59.93    5.77
   1  -4 -13   65.52    5.19
  -1   4  13   64.48    4.18
  -1   4  13   76.04    3.81
   1  -4 -13   71.42    4.01
   1  -4 -12  454.71   21.51
   1  -4 -12  462.07   20.17
  -1   4  12  418.30   19.95
   1  -4 -12  459.10   20.08
  -1   4  11   44.89    2.50
   1  -4 -11   39.08    3.72
   1  -4 -10  194.91    8.88
  -1   4  10  188.07    8.67
  -1   4  10  176.51   10.13
   1  -4 -10  188.72    9.89
  -1   4   9  299.60   14.54
   1  -4  -9  280.85   13.51
   1  -4  -9  291.49   13.50
   1  -4  -9  310.14   14.38
   1  -4  -9  307.21   13.52
  -1   4   9  285.79   13.09
   1  -4  -8   55.13    3.48
  -1   4   8   61.53    4.58
   1  -4  -8   56.26    4.02
   1  -4  -8   53.11    3.35
   1  -4  -7  161.32    7.78
  -1   4   7  160.05    8.27
   1  -4  -7  160.42    8.11
   1  -4  -7  150.28    7.64
   1  -4  -6 1604.63   74.50
  -1   4   6 1668.17   74.81
   1  -4  -6 1789.19   74.65
  -1   4   5  413.74   19.77
   1  -4  -5  451.81   19.77
   1  -4  -4    5.29    1.52
  -1   4   4    4.27    1.46
   1  -4  -3   92.07    4.61
  -1   4   3   86.87    4.48
  -1   4   2   26.25    1.70
   1  -4  -2   31.21    2.34
   1  -4  -1 1321.20   57.34
  -1   4   1 1277.34   56.88
   1  -4   0 1708.42   75.80
   1  -4   1   20.55    2.06
   1  -4   2   71.39    4.01
   1  -4   2   68.11    3.83
   1  -4   3  885.01   41.08
  -1   4  -3  975.83   41.89
   1  -4   3  921.72   41.02
   1  -4   4    5.55    1.91
  -1   4  -4    8.99    4.24
   1  -4   4    4.00    1.68
   1  -4   5   55.20    3.36
   1  -4   5   48.46    3.40
   1  -4   5   62.76    3.41
   1  -4   5   51.07    2.68
  -1   4  -5   58.04    5.24
   1  -4   5   57.71    4.16
  -1   4  -6   19.74    3.92
   1  -4   6   20.49    1.83
   1  -4   6   18.06    1.37
  -1   4  -7   10.06    3.24
   1  -4   7   10.20    1.11
  -1   4  -8    6.82    2.89
   1  -4   8    5.53    1.08
  -1   4  -9   -2.57    2.93
   1  -4   9    0.25    1.28
  -1   4  -9    0.19    1.47
   1  -4   9    0.34    1.06
  -1   4 -10   69.16    5.47
   1  -4  10   75.60    4.19
  -1   4 -10   76.21    4.21
   1  -4  10   73.17    3.85
   1  -4  11    2.17    1.44
  -1   4 -11    4.62    2.65
   1  -4  11    2.04    1.66
  -1   4 -11    1.86    1.72
   1  -4  11    3.41    1.31
   1  -4  12   58.79    3.39
  -1   4 -12   50.18    4.73
   1  -4  12   51.96    3.52
  -1   4 -12   52.59    3.55
   1  -4  12   54.91    3.17
   1  -4  13   18.02    2.00
   1  -4  13   23.63    2.14
  -1   4 -13   14.20    3.05
   1  -4  13   20.53    2.29
   1  -4  13   21.46    1.91
  -1   4 -13   21.91    2.31
   1  -4  14   50.05    3.12
  -1   4 -14   47.75    3.22
   1  -4  14   46.20    3.21
   1  -4  14   50.98    3.07
   1  -4  14   49.44    2.95
  -1   4 -15    8.13    1.56
   1  -4  15    5.90    1.71
  -1   4 -15    7.26    1.68
   1  -4  15    6.49    1.43
   1  -4  15    5.62    1.36
  -1   4 -16    8.54    1.40
   1  -4  16    8.74    1.47
  -1   4 -16    6.94    1.43
   1  -4  16    8.30    1.30
   1  -4  16    8.59    1.27
  -1   4 -17    8.58    1.25
   1  -4  17    7.72    1.25
  -1   4 -17    7.10    1.15
   1  -4  17    6.91    1.26
   1  -4  17    9.45    1.10
   1  -4  18    2.75    0.80
  -1   4 -18    2.51    0.80
   1  -4  18    3.04    0.71
  -1   4 -18    2.31    0.78
  -1   3  22    0.83    0.68
   1  -3 -22    0.19    0.63
  -1   3  21    7.43    1.29
   1  -3 -21    5.56    1.11
   1  -3 -21    6.16    1.20
  -1   3  20   69.42    3.35
  -1   3  20   57.32    3.70
   1  -3 -20   61.74    3.49
   1  -3 -20   59.55    3.49
  -1   3  19    5.23    1.37
  -1   3  19    1.89    2.06
   1  -3 -19    4.87    1.62
   1  -3 -19    6.23    1.67
  -1   3  18   59.13    3.33
  -1   3  18   55.06    4.02
   1  -3 -18   54.28    3.41
   1  -3 -18   50.66    3.57
   1  -3 -17    5.50    1.97
  -1   3  17    7.12    2.67
  -1   3  17    7.02    1.72
  -1   3  16   64.11    4.87
  -1   3  16   75.18    4.06
  -1   3  16   69.07    5.99
   1  -3 -16   71.97    4.36
  -1   3  15   16.17    1.93
   1  -3 -15   17.34    2.33
  -1   3  15   20.10    4.07
  -1   3  14  111.43    5.56
  -1   3  14  108.82    7.55
   1  -3 -14  110.42    5.79
   1  -3 -14  102.10    7.10
  -1   3  13  147.67    7.22
  -1   3  13  147.56    9.06
   1  -3 -13  158.57    7.39
   1  -3 -13  138.32    8.69
  -1   3  12    7.11    1.36
  -1   3  12   15.93    3.38
   1  -3 -12   13.62    1.67
   1  -3 -12   14.06    2.61
  -1   3  11  254.12   12.60
  -1   3  11  238.98   10.97
   1  -3 -11  232.94   12.31
  -1   3  10   19.45    1.54
   1  -3 -10   25.28    2.92
   1  -3  -9   52.75    2.73
  -1   3   9   48.53    2.59
   1  -3  -8  166.78    7.53
   1  -3  -8  166.02    8.26
   1  -3  -8  157.24    7.51
  -1   3   8  153.50    8.47
   1  -3  -8  148.88    7.53
   1  -3  -7  158.56    7.95
   1  -3  -7  180.46    8.52
  -1   3   7  164.73    8.66
   1  -3  -7  174.85    8.05
   1  -3  -6 1865.96   87.21
   1  -3  -6 2060.17   87.61
   1  -3  -6 2078.35   87.32
  -1   3   6 1930.76   87.58
  -1   3   5   20.79    2.16
   1  -3  -5   18.98    1.82
   1  -3  -5   21.14    1.74
   1  -3  -4   36.95    2.17
  -1   3   4   29.39    2.40
   1  -3  -4   32.22    2.30
  -1   3   3    2.01    1.29
  -1   3   2    1.31    1.03
   1  -3  -2    1.51    1.46
   1  -3  -2    1.46    1.17
   1  -3  -1 3833.29  166.81
  -1   3   1 3764.11  166.47
   1  -3   0 2239.37   95.74
  -1   3   0 2154.65   95.26
   1  -3   1  758.02   33.88
   1  -3   1  760.81   33.95
   1  -3   2 2881.40  127.62
   1  -3   2 2904.49  127.70
   1  -3   3  166.44    7.95
  -1   3  -3  182.86    8.89
   1  -3   3  161.91    8.02
   1  -3   4  588.01   26.39
  -1   3  -4  594.58   27.28
   1  -3   4  623.33   26.52
   1  -3   4  576.55   26.01
   1  -3   5   26.19    2.06
   1  -3   5   25.81    2.10
   1  -3   5   20.67    2.88
  -1   3  -5   25.99    4.23
   1  -3   5   19.30    1.60
   1  -3   5   20.12    2.17
   1  -3   6   24.45    1.76
   1  -3   6   20.05    1.80
   1  -3   6   20.49    1.49
   1  -3   7   19.05    1.81
  -1   3  -7   20.23    3.83
   1  -3   7   26.28    1.60
  -1   3  -8    1.10    2.79
   1  -3   8   -0.32    0.99
   1  -3   9   75.61    4.15
  -1   3  -9   78.88    4.16
   1  -3   9   78.86    3.87
   1  -3  10    0.72    1.54
  -1   3 -10    5.12    2.50
  -1   3 -10    4.08    1.50
   1  -3  10    0.77    1.16
   1  -3  11   24.32    2.35
  -1   3 -11   27.94    3.55
  -1   3 -11   22.21    2.28
   1  -3  11   25.18    1.93
   1  -3  12   45.01    3.12
  -1   3 -12   47.21    4.33
  -1   3 -12   47.72    3.02
   1  -3  12   36.16    2.63
   1  -3  13  180.79    9.20
  -1   3 -13  180.84   10.81
   1  -3  13  201.70    9.46
  -1   3 -13  191.31    9.38
   1  -3  13  205.10    9.18
   1  -3  14   86.70    4.83
   1  -3  14   91.30    4.97
  -1   3 -14   80.12    6.28
   1  -3  14  101.73    5.16
   1  -3  14   96.84    4.84
  -1   3 -14   96.22    5.11
   1  -3  15   10.10    1.88
   1  -3  15    7.78    1.54
   1  -3  15    9.24    1.58
  -1   3 -15    8.00    1.81
   1  -3  16    2.63    1.62
   1  -3  16    1.57    1.25
   1  -3  16    0.92    1.21
  -1   3 -16    0.21    1.55
  -1   3 -17    8.53    1.29
   1  -3  17    8.23    1.47
   1  -3  17    9.05    1.24
  -1   3 -17    9.26    1.44
   1  -3  18   13.66    1.38
  -1   3 -18   15.57    1.33
  -1   3 -18   14.53    1.39
   1  -3  18   18.82    1.30
  -1   3 -19    1.80    0.69
  -1   3 -19    1.19    0.67
   1  -3  19    1.35    0.63
  -1   2  22    1.34    0.53
  -1   2  21    3.02    1.03
   1  -2 -21    3.01    0.84
   1  -2 -21    2.04    1.03
  -1   2  20   49.07    3.10
   1  -2 -20   46.16    2.83
   1  -2 -20   48.18    2.98
  -1   2  19   66.96    4.11
   1  -2 -19   66.51    3.77
   1  -2 -19   69.29    3.94
  -1   2  19   69.45    3.65
  -1   2  18    0.53    2.13
   1  -2 -18    0.48    1.54
   1  -2 -18    3.21    1.74
  -1   2  18    0.80    1.40
  -1   2  17    2.27    2.39
  -1   2  17    0.71    1.54
   1  -2 -17    2.66    1.70
   1  -2 -17    1.26    1.83
  -1   2  16    3.72    3.05
  -1   2  16    2.43    2.60
  -1   2  16    0.51    1.59
   1  -2 -16    1.28    2.44
   1  -2 -16   -0.48    2.06
  -1   2  15  207.57    9.91
  -1   2  15  209.57   10.46
  -1   2  15  189.85   11.64
   1  -2 -15  218.62   10.16
  -1   2  14   26.62    4.00
   1  -2 -14   26.75    2.52
  -1   2  14   28.85    2.24
  -1   2  13   39.24    4.26
   1  -2 -13   37.25    2.77
  -1   2  13   44.00    2.63
  -1   2  12    2.73    1.26
   1  -2 -12    6.61    1.49
  -1   2  12    6.40    2.90
  -1   2  11   10.38    1.34
  -1   2  11   11.56    2.90
  -1   2  10    3.70    1.12
  -1   2  10    3.17    2.80
  -1   2   9    0.11    1.05
   1  -2  -9   -0.25    2.02
   1  -2  -8   43.89    2.35
   1  -2  -8   52.03    3.55
   1  -2  -7 1122.31   49.04
   1  -2  -7 1072.01   49.03
   1  -2  -7 1174.50   49.69
   1  -2  -6   13.00    1.21
  -1   2   6    7.18    2.10
   1  -2  -6    9.00    1.20
   1  -2  -6   10.46    1.17
   1  -2  -6    9.98    1.61
  -1   2   5   13.25    1.95
   1  -2  -5   12.85    1.34
   1  -2  -5   15.36    1.63
   1  -2  -4  850.41   40.13
   1  -2  -4  939.91   40.21
  -1   2   4  902.88   40.34
   1  -2  -4  948.15   40.37
   1  -2  -3  813.95   37.28
   1  -2  -3  901.53   37.38
  -1   2   3  811.57   37.35
  -1   2   2   43.99    2.47
   1  -2  -1   13.96    1.34
   1  -2  -1   13.04    1.19
   1  -2  -1    8.82    1.43
  -1   2   1    8.61    0.92
   1  -2   0   14.74    1.38
   1  -2   0   12.33    1.29
   1  -2   0    5.89    1.37
   1  -2   1  318.85   13.20
   1  -2   1  260.85   13.20
   1  -2   2  289.04   14.99
   1  -2   2  399.76   15.20
   1  -2   3  661.94   32.20
   1  -2   3  734.27   32.30
   1  -2   3  748.88   31.99
   1  -2   4  143.57    8.15
   1  -2   4  160.39    8.22
   1  -2   4  205.88    8.38
   1  -2   4  200.14    8.11
   1  -2   5  375.01   17.46
   1  -2   5  395.52   17.51
   1  -2   5  394.29   17.50
   1  -2   6  106.17    4.84
   1  -2   6  105.12    4.91
   1  -2   6   92.69    5.19
   1  -2   7   22.20    1.51
   1  -2   7   15.75    1.99
   1  -2   8   82.58    4.10
   1  -2   8   86.51    4.63
   1  -2   9    8.93    1.67
  -1   2  -9    9.43    2.57
   1  -2   9    5.22    1.12
   1  -2  10  164.39    7.41
   1  -2  10  161.58    7.70
  -1   2 -10  165.90    7.65
  -1   2 -10  162.83    8.96
   1  -2  11   47.71    3.35
   1  -2  11   54.05    3.00
  -1   2 -11   53.74    3.23
  -1   2 -11   49.54    4.52
   1  -2  12   -1.30    1.82
   1  -2  12    0.31    1.35
  -1   2 -12    2.76    1.71
  -1   2 -12    1.09    2.53
   1  -2  13  380.81   18.23
   1  -2  13  418.15   18.55
   1  -2  13  414.62   18.26
  -1   2 -13  412.52   18.44
  -1   2 -13  355.55   19.82
   1  -2  14   27.92    2.17
   1  -2  14   40.22    2.52
   1  -2  14   35.13    2.84
  -1   2 -14   29.66    2.57
  -1   2 -14   21.47    3.47
   1  -2  15    5.61    1.59
   1  -2  15    6.59    1.59
  -1   2 -15    2.14    1.82
   1  -2  15    5.48    1.94
   1  -2  16   19.43    1.85
   1  -2  16   18.99    1.86
   1  -2  16   18.38    2.15
  -1   2 -16   14.67    2.02
   1  -2  17   -0.25    1.18
  -1   2 -17   -0.84    1.39
   1  -2  17    1.09    1.44
   1  -2  18   46.09    2.63
  -1   2 -18   47.35    2.70
   1  -2  18   47.48    2.77
  -1   2 -18   49.28    2.78
   1  -2  19   -0.29    0.86
  -1   2 -19    0.45    0.81
  -1   2 -19    0.65    0.89
  -1   1  21    0.44    0.86
   1  -1 -21    0.58    0.82
  -1   1  20   14.63    1.27
   1  -1 -20   11.43    1.24
  -1   1  20   13.64    1.61
  -1   1  19   49.02    2.66
   1  -1 -19   39.72    2.65
  -1   1  19   43.36    3.09
  -1   1  18   14.10    1.71
   1  -1 -18   16.15    1.80
  -1   1  18   15.02    2.46
  -1   1  17    1.50    1.50
  -1   1  17   -1.91    2.29
   1  -1 -17    0.31    1.53
  -1   1  16    2.62    2.47
   1  -1 -16    0.18    2.29
  -1   1  16    2.01    1.61
  -1   1  16   -1.87    2.70
  -1   1  15    4.27    2.54
   1  -1 -15    3.98    2.48
  -1   1  15    2.63    1.62
  -1   1  15    1.25    2.85
  -1   1  14  134.85    8.18
   1  -1 -14  135.28    8.21
  -1   1  14  137.33    7.03
  -1   1  14  122.69    6.45
   1  -1 -14  134.15    6.68
  -1   1  13  443.59   21.18
   1  -1 -13  432.01   19.77
  -1   1  13  435.62   19.61
   1  -1 -13  418.39   21.20
  -1   1  12   74.98    3.90
  -1   1  12   72.25    5.34
   1  -1 -12   73.16    4.04
  -1   1  11   91.10    4.57
  -1   1  11   97.44    6.02
  -1   1  10   25.51    1.82
  -1   1  10   28.26    3.34
  -1   1   9    7.18    1.21
  -1   1   9   13.19    2.80
  -1   1   8  332.67   15.19
   1  -1  -8  353.48   15.44
  -1   1   8  338.49   16.19
   1  -1  -7 1137.53   50.43
   1  -1  -6  924.95   41.75
   1  -1  -6 1000.42   41.94
   1  -1  -6  935.44   41.76
   1  -1  -5   64.85    3.35
   1  -1  -5   68.78    3.32
   1  -1  -5   68.67    3.32
   1  -1  -4  271.94   13.05
   1  -1  -4  286.27   13.09
   1  -1  -4  313.44   13.08
  -1   1   4  288.75   13.37
   1  -1  -3    1.63    0.81
   1  -1  -3    1.38    0.96
  -1   1   3    1.07    1.37
   1  -1  -3    1.24    1.05
   1  -1  -3    1.11    0.98
   1  -1  -3    2.51    1.01
  -1   1   2    2.07    1.06
   1  -1  -1 2303.49   92.96
   1  -1  -1 1980.94   92.84
   1  -1  -1 2085.76   92.90
   1  -1  -1 2119.84   92.88
   1  -1   0  101.13    4.84
   1  -1   0  104.33    4.71
   1  -1   0   97.79    4.71
   1  -1   0  102.74    4.81
   1  -1   1  121.86    5.68
   1  -1   1  122.61    5.62
   1  -1   1  117.12    5.71
   1  -1   2  286.75   12.82
   1  -1   2  271.00   12.79
  -1   1  -2  314.64   13.33
   1  -1   2  274.75   12.72
   1  -1   2  290.53   12.63
   1  -1   2  275.19   12.84
   1  -1   3  110.94    5.45
   1  -1   3  104.93    5.59
  -1   1  -3  104.75    6.25
   1  -1   3  131.16    5.63
   1  -1   3  132.53    5.62
   1  -1   4   11.79    1.33
  -1   1  -4   10.12    2.49
   1  -1   4   16.78    1.32
   1  -1   4   18.87    1.37
   1  -1   5  198.81    8.66
  -1   1  -5  175.76    9.29
   1  -1   5  174.97    8.36
   1  -1   5  187.52    8.40
   1  -1   6  336.25   15.45
   1  -1   7   37.52    2.94
   1  -1   7   41.04    2.24
   1  -1   8   71.33    4.14
   1  -1   8   61.95    3.26
   1  -1   9   69.61    4.30
   1  -1  10   12.43    2.13
   1  -1  11   55.68    4.15
  -1   1 -11   63.46    3.63
   1  -1  11   62.83    3.79
   1  -1  11   66.97    3.78
  -1   1 -12   -0.14    1.56
   1  -1  12    0.21    1.82
  -1   1 -13   34.96    2.66
  -1   1 -13   29.60    3.82
   1  -1  13   37.99    3.00
   1  -1  14   43.89    2.69
  -1   1 -14   41.11    4.31
   1  -1  14   45.67    3.33
  -1   1 -14   44.91    3.10
  -1   1 -15   83.57    4.48
   1  -1  15   80.27    4.67
  -1   1 -16    1.89    1.76
   1  -1  16    3.22    1.93
   1  -1  17    2.26    1.67
  -1   1 -17    0.65    1.58
   1  -1  17    0.23    1.22
   1  -1  18    5.96    1.46
  -1   1 -18    4.07    1.41
   1  -1  19   -0.80    1.08
  -1   1 -19    1.39    1.06
   1  -1  20   12.65    1.03
  -1   1 -20   13.66    1.10
   1  -1  20   13.28    1.20
  -1   0  21   -0.28    0.66
  -1   0  20    9.15    1.01
  -1   0  20    6.26    1.28
   1   0 -19   13.94    1.39
   1   0 -19   12.00    1.34
  -1   0  19   13.56    1.84
  -1   0  19   17.56    1.46
   1   0 -18   26.83    2.12
  -1   0  18   27.24    2.66
  -1   0  18   33.55    2.18
   1   0 -17    4.00    1.51
  -1   0  17    2.36    1.50
  -1   0  17   -0.35    2.12
  -1   0  16    6.83    2.38
   1   0 -16    7.90    1.64
  -1   0  16    8.08    1.69
   1   0 -16    6.32    2.45
  -1   0  15   14.47    2.72
   1   0 -15   10.68    2.87
  -1   0  15   16.53    1.98
  -1   0  15   14.39    3.03
  -1   0  14    3.05    2.29
   1   0 -14    4.68    2.39
  -1   0  14    4.90    1.57
  -1   0  14    4.20    2.84
  -1   0  13   38.26    3.19
   1   0 -13   38.37    3.87
  -1   0  13   33.72    2.51
  -1   0  13   43.81    4.11
  -1   0  12   50.91    3.54
  -1   0  12   63.32    4.55
  -1   0  12   48.97    3.04
   1   0 -12   65.42    4.53
   1   0 -11   81.71    4.39
   1   0 -11   79.33    5.36
  -1   0  11   79.54    5.42
  -1   0  11   86.62    4.22
   1   0 -10   41.79    3.40
  -1   0  10   43.51    3.55
   1   0  -9  316.67   14.61
  -1   0   9  321.76   14.56
  -1   0   9  292.79   13.48
   1   0  -9  293.87   13.82
   1   0  -8   11.40    2.29
  -1   0   8   12.60    2.66
   1   0  -8   19.97    1.74
  -1   0   8   19.32    1.45
  -1   0   7  129.72    6.57
   1   0  -7  116.67    5.90
   1   0  -6    3.75    1.00
  -1   0   6    3.60    1.81
   1   0  -5   54.67    2.90
   1   0  -4  168.95    7.66
   1   0  -4  161.32    7.65
   1   0  -4  176.12    7.66
   1   0  -4  170.79    7.80
   1   0  -4  169.40    7.66
   1   0  -3  282.90   12.00
   1   0  -3  260.42   11.96
   1   0  -3  263.01   11.97
   1   0  -3  263.63   12.06
   1   0  -3  264.91   11.99
   1   0  -2    0.46    0.69
   1   0  -2    0.34    0.63
   1   0  -2    0.93    0.77
   1   0  -2    1.46    0.67
   1   0  -2    0.25    0.78
   1   0  -1  144.34    6.85
   1   0  -1  157.74    6.90
   1   0   0  695.74   30.75
   1   0   0  692.87   30.77
   1   0   1   32.85    1.83
   1   0   1   33.46    1.79
   1   0   2  170.60    5.64
   1   0   2  107.47    5.53
   1   0   2  116.49    5.62
  -1   0  -2  159.75    6.10
   1   0   2   97.34    5.57
   1   0   2  108.58    5.51
   1   0   3    2.02    0.75
   1   0   3    0.99    1.01
  -1   0  -3    1.83    1.92
   1   0   3    2.43    0.71
   1   0   3    2.66    1.07
   1   0   3    1.44    1.06
   1   0   4  442.22   19.83
   1   0   4  425.21   19.75
   1   0   4  410.26   19.80
   1   0   4  547.51   20.09
  -1   0  -4  520.73   20.54
   1   0   5   19.30    1.78
  -1   0  -5   18.24    2.46
   1   0   6   96.25    5.07
  -1   0  -6   96.59    5.55
   1   0   7    2.07    1.94
   1   0   8   51.80    3.74
  -1   0  -8   55.54    4.27
   1   0   9  255.63   12.37
  -1   0  -9  252.12   12.80
   1   0  10  307.61   15.28
  -1   0 -10  333.65   15.76
   1   0  11   62.39    4.13
   1   0  11   50.02    3.43
   1   0  11   48.94    3.38
  -1   0 -11   57.45    3.23
   1   0  12  117.79    5.60
   1   0  12  100.71    6.56
   1   0  12  117.46    6.00
   1   0  12  114.14    5.99
  -1   0 -12  106.29    5.75
   1   0  13   84.75    4.46
   1   0  13   78.38    5.47
  -1   0 -13   80.31    4.60
   1   0  13   87.49    4.90
   1   0  13   86.85    4.93
  -1   0 -14   19.47    2.33
   1   0  14   19.58    2.09
   1   0  14   21.05    2.67
  -1   0 -15  206.08   10.44
   1   0  15  225.45   10.35
   1   0  15  223.63   10.71
  -1   0 -16   91.98    5.15
   1   0  16   97.25    5.01
   1   0  16   94.03    5.35
  -1   0 -17  103.84    5.61
   1   0  17  107.85    5.47
   1   0  17  111.20    5.80
   1   0  18    0.37    1.22
  -1   0 -18    1.13    1.08
   1   0  18    1.71    1.59
  -1   0 -18    0.85    1.51
   1   0  19    9.67    1.46
  -1   0 -19    5.94    1.37
   1   0  19   10.08    1.23
  -1   0 -20    5.04    1.00
   1   0  20    3.46    0.95
  -1   0 -20    4.88    0.90
   1   0  21   13.02    0.94
  -1  -1  20   -1.18    0.95
  -1  -1  19    1.45    0.99
  -1  -1  19    3.22    1.14
  -1  -1  19    3.22    1.36
   1   1 -19    0.69    0.96
  -1  -1  18    0.22    1.18
   1   1 -18    0.81    1.15
  -1  -1  18   -0.68    1.65
   1   1 -17    2.43    1.25
  -1  -1  17    1.50    1.41
  -1  -1  17    1.44    1.97
   1   1 -16    3.11    1.36
  -1  -1  16   -0.18    2.18
  -1  -1  16    3.23    1.57
   1   1 -15    4.78    1.41
  -1  -1  15    2.40    1.59
   1   1 -15    4.58    2.35
  -1  -1  15    2.84    2.24
  -1  -1  14   57.45    4.84
  -1  -1  14   65.19    3.75
   1   1 -14   72.21    5.28
  -1  -1  14   66.92    4.34
  -1  -1  13    0.37    2.40
  -1  -1  13   -0.65    1.47
   1   1 -13    0.30    2.10
  -1  -1  13   -1.05    2.05
  -1  -1  12   41.77    3.94
  -1  -1  12   46.97    2.73
   1   1 -12   39.60    3.80
  -1  -1  12   44.62    3.23
  -1  -1  11    9.34    2.41
  -1  -1  11    5.44    1.31
   1   1 -11    8.38    2.31
  -1  -1  11    7.06    1.85
  -1  -1  10  202.43    9.95
  -1  -1  10  190.55    8.89
   1   1 -10  190.00   10.06
  -1  -1   9    7.75    2.36
  -1  -1   9    8.04    1.20
   1   1  -9    9.36    1.50
  -1  -1   8   17.71    2.59
  -1  -1   8   15.50    1.39
   1   1  -8   12.86    1.76
   1   1  -8   15.69    2.42
   1   1  -7  650.62   27.31
  -1  -1   7  594.97   26.82
   1   1  -7  589.46   27.58
  -1  -1   7  600.13   27.53
   1   1  -6  102.37    5.00
  -1  -1   6   95.68    5.34
   1   1  -6   97.42    5.27
   1   1  -5  125.38    5.86
   1   1  -5  142.10    6.46
  -1  -1   5  146.05    6.59
   1   1  -5  139.90    6.25
   1   1  -5  124.36    5.86
   1   1  -4  313.43   14.70
  -1  -1   4  360.80   15.17
   1   1  -4  352.79   15.06
   1   1  -4  332.13   14.91
   1   1  -4  324.03   14.72
   1   1  -3  795.35   35.36
  -1  -1   3  719.89   35.55
   1   1  -3  759.70   35.36
   1   1  -3  794.62   35.46
   1   1  -3  809.20   35.38
   1   1  -2  121.64    5.71
   1   1  -2  118.92    5.72
  -1  -1   2  114.47    5.78
   1   1  -2  121.41    5.70
   1   1  -2  135.11    5.71
   1   1  -1 8643.99  398.07
  -1  -1   1 8816.57  398.01
   1   1  -1 9999.00  397.99
   1   1  -1 8900.07  398.08
   1   1  -1 8662.54  398.06
   1   1  -1 8913.98  398.06
  -1  -1   0  602.96   27.24
   1   1   0  643.44   27.41
   1   1   0  610.25   27.36
   1   1   0  650.21   27.42
   1   1   1 2250.40   98.84
  -1  -1  -1 2236.76   98.80
   1   1   2   24.82    1.58
   1   1   2   23.22    1.56
   1   1   3 2468.57  108.03
  -1  -1  -3 2587.63  108.30
   1   1   3 2378.15  108.00
   1   1   4    2.60    0.88
   1   1   4    2.69    0.79
   1   1   4    2.41    0.82
   1   1   4    1.78    1.43
  -1  -1  -4    1.14    1.58
  -1  -1  -5  719.37   27.21
   1   1   5  571.49   26.45
   1   1   5  565.82   26.47
   1   1   5  751.54   27.04
  -1  -1  -6   -1.18    1.86
   1   1   6    1.68    1.67
  -1  -1  -7   11.26    2.35
   1   1   7   10.01    2.15
  -1  -1  -8  109.02    5.26
   1   1   8   97.96    5.03
  -1  -1  -9    9.75    2.74
   1   1   9   17.29    1.45
   1   1   9   11.48    2.62
  -1  -1 -10    5.99    2.31
   1   1  10    3.98    1.13
   1   1  10    4.36    2.32
  -1  -1 -11   54.55    3.12
   1   1  11   49.14    4.12
  -1  -1 -11   50.71    4.26
   1   1  11   54.95    3.00
  -1  -1 -12   67.94    3.77
   1   1  12   68.13    4.16
   1   1  12   62.62    4.01
   1   1  12   76.63    5.06
  -1  -1 -12   72.32    5.09
   1   1  12   63.41    3.61
  -1  -1 -13   76.72    4.30
   1   1  13   76.59    4.65
   1   1  13   81.87    4.71
   1   1  13   64.16    5.32
  -1  -1 -13   70.99    5.54
   1   1  13   81.76    4.19
  -1  -1 -14   59.64    3.62
   1   1  14   58.27    4.02
   1   1  14   58.76    3.95
   1   1  14   57.03    4.75
   1   1  14   51.24    3.40
  -1  -1 -14   63.29    5.03
   1   1  15   66.80    3.99
   1   1  15   75.95    4.57
  -1  -1 -15   66.64    4.19
   1   1  16  306.35   14.00
   1   1  16  308.26   14.33
  -1  -1 -16  291.45   14.11
   1   1  17    4.79    1.59
   1   1  17    3.17    2.15
  -1  -1 -17    5.28    1.81
   1   1  18   14.77    1.70
   1   1  18   13.77    2.15
  -1  -1 -18   14.80    1.92
  -1  -1 -19    1.97    1.11
   1   1  19    1.89    1.14
   1   1  19    3.75    1.40
  -1  -1 -19    1.21    1.36
  -1  -1 -20   22.59    1.59
   1   1  20   21.35    1.55
   1   1  20   23.05    1.71
  -1  -1 -20   22.98    1.74
  -1  -1 -21    0.81    0.56
   1   1  21    0.29    0.62
  -1  -1 -21    1.01    0.67
  -1  -2  20    8.72    0.94
  -1  -2  19    1.21    0.87
  -1  -2  19    0.74    0.95
   1   2 -19    0.15    0.86
  -1  -2  19    0.86    1.13
  -1  -2  18    1.16    1.09
  -1  -2  18    0.92    1.24
  -1  -2  18    2.30    1.50
   1   2 -18    1.37    1.09
  -1  -2  17   18.69    1.80
   1   2 -17   23.56    1.96
  -1  -2  17   24.75    2.35
  -1  -2  16    0.83    2.01
  -1  -2  16   -0.71    1.44
   1   2 -15   61.84    5.49
  -1  -2  15   73.53    4.85
  -1  -2  14    0.18    2.16
  -1  -2  14    3.15    1.59
   1   2 -14    1.61    2.17
   1   2 -14    3.26    1.30
  -1  -2  13  241.97   10.96
   1   2 -13  217.31   12.43
  -1  -2  13  247.88   11.37
  -1  -2  13  209.51   11.88
  -1  -2  12    3.97    1.41
   1   2 -12    7.51    2.41
  -1  -2  12    4.50    2.02
  -1  -2  12    3.64    2.25
  -1  -2  11    8.71    1.39
   1   2 -11    8.17    2.32
  -1  -2  11    8.60    1.93
  -1  -2  11    9.34    2.21
   1   2 -10   49.59    3.25
  -1  -2  10   44.77    2.65
   1   2 -10   44.93    3.81
  -1  -2  10   50.01    3.10
  -1  -2  10   52.21    3.70
   1   2  -9   17.23    1.97
  -1  -2   9   17.81    1.48
  -1  -2   9   22.67    2.50
   1   2  -9   20.02    2.57
   1   2  -8   18.31    2.06
  -1  -2   8   19.60    1.48
  -1  -2   8   16.69    2.43
   1   2  -8   17.28    2.53
   1   2  -7  189.55    8.34
  -1  -2   7  191.77    8.21
   1   2  -6  483.57   22.12
  -1  -2   6  494.89   22.26
   1   2  -6  484.69   22.36
   1   2  -5    3.47    0.87
   1   2  -5    3.35    0.80
   1   2  -5    3.42    1.25
   1   2  -5   11.51    1.59
   1   2  -5    5.66    0.92
  -1  -2   5   10.01    1.67
   1   2  -4   50.45    2.70
  -1  -2   4   46.78    3.22
   1   2  -4   47.98    2.69
   1   2  -3    8.38    1.12
  -1  -2   3    8.45    1.68
   1   2  -3   11.40    1.32
  -1  -2   2   27.99    2.10
   1   2  -2   22.92    1.84
  -1  -2   1  565.72   25.76
  -1  -2   1  557.60   25.75
   1   2  -1  607.58   25.64
   1   2  -1  567.62   25.76
  -1  -2   0  407.85   17.90
   1   2   0  394.14   17.99
   1   2   1  117.90    5.18
  -1  -2  -1  105.94    4.82
  -1  -2  -2 3179.65  130.00
   1   2   2 3214.91  130.17
  -1  -2  -3  169.57    7.54
   1   2   3  151.10    7.50
   1   2   3  169.07    7.68
  -1  -2  -4 1123.84   47.52
   1   2   4 1036.16   47.31
   1   2   5  174.28    8.11
  -1  -2  -5  189.04    8.50
   1   2   5  173.66    8.13
   1   2   6  725.61   33.48
   1   2   6  717.21   33.51
   1   2   6  902.43   34.17
  -1  -2  -6  849.79   34.12
  -1  -2  -7   42.74    2.71
   1   2   7   22.83    1.30
   1   2   7   19.51    1.19
   1   2   7   40.14    2.93
  -1  -2  -7   24.08    1.17
   1   2   8   79.88    4.71
  -1  -2  -8   77.65    4.48
   1   2   9  100.14    5.73
   1   2   9   84.27    4.31
  -1  -2  -9   98.09    5.66
   1   2  10    9.88    2.70
   1   2  10    6.98    1.26
  -1  -2 -10    6.63    2.38
   1   2  11  284.11   13.74
  -1  -2 -11  282.80   13.73
   1   2  11  266.39   12.41
  -1  -2 -12   75.91    4.11
   1   2  12   77.79    4.46
   1   2  12   72.80    5.31
  -1  -2 -12   71.95    5.26
   1   2  12   74.57    3.97
  -1  -2 -13    2.37    1.58
   1   2  13    0.85    2.29
   1   2  13   -1.62    2.61
  -1  -2 -13   -1.60    2.52
   1   2  13    0.41    1.45
  -1  -2 -14   18.95    2.15
   1   2  14   20.32    2.75
   1   2  14   16.37    2.71
   1   2  14   18.06    3.41
  -1  -2 -14   14.56    2.97
   1   2  14   14.39    1.95
  -1  -2 -15   52.46    3.48
   1   2  15   60.07    4.01
   1   2  15   51.09    3.83
   1   2  15   45.12    4.64
   1   2  15   52.40    3.36
  -1  -2 -15   52.21    4.75
   1   2  16    6.92    2.51
   1   2  16    2.95    2.45
  -1  -2 -16    4.37    1.94
   1   2  16    6.04    1.79
  -1  -2 -16    3.76    2.42
   1   2  17    3.43    1.64
   1   2  17    5.81    2.22
  -1  -2 -17    2.48    1.91
   1   2  18    2.22    1.44
   1   2  18   -0.80    2.08
  -1  -2 -18    2.83    1.71
  -1  -2 -19    4.47    1.30
   1   2  19    5.83    1.31
   1   2  19    3.16    1.71
  -1  -2 -19    5.54    1.60
  -1  -2 -20    0.47    0.97
  -1  -2 -20    0.16    1.21
   1   2  20    1.10    1.00
   1   2  20    1.83    1.25
  -1  -2 -21    2.71    0.92
   1   2  21    2.67    0.87
  -1  -2 -21    4.11    0.77
   1   3 -19    0.95    0.74
  -1  -3  19    0.19    0.90
  -1  -3  18    0.95    1.04
   1   3 -18    1.19    1.20
  -1  -3  18    0.59    0.96
   1   3 -18    0.93    1.01
  -1  -3  18    0.51    1.24
  -1  -3  17   81.67    4.26
   1   3 -17   78.42    4.14
  -1  -3  17   77.86    4.33
   1   3 -17   71.94    4.23
  -1  -3  17   80.70    4.05
  -1  -3  16    0.10    1.80
   1   3 -16    2.67    1.44
   1   3 -16    0.09    1.73
  -1  -3  16    0.80    1.31
  -1  -3  15    5.00    2.03
  -1  -3  15    1.46    1.40
   1   3 -15    1.13    1.82
  -1  -3  14   36.24    3.06
   1   3 -14   37.02    3.80
  -1  -3  14   38.22    2.57
   1   3 -14   32.18    2.88
   1   3 -13    8.68    2.43
  -1  -3  13    7.72    2.23
  -1  -3  13   13.21    1.72
   1   3 -12    5.69    2.29
  -1  -3  12    4.04    2.02
  -1  -3  12    4.99    1.47
  -1  -3  11   -1.10    1.85
   1   3 -11    0.64    2.00
  -1  -3  11   -0.40    1.71
  -1  -3  11    0.86    1.28
  -1  -3  10   58.88    4.17
   1   3 -10   63.59    4.62
  -1  -3  10   60.54    3.83
  -1  -3  10   69.62    3.46
   1   3 -10   71.70    4.29
  -1  -3   9   37.68    3.00
   1   3  -9   37.70    3.22
   1   3  -9   37.53    2.98
  -1  -3   8   18.39    2.20
   1   3  -8   22.95    2.65
   1   3  -8   16.71    2.04
   1   3  -7   23.07    2.70
  -1  -3   7   23.66    2.49
   1   3  -7   24.67    2.47
  -1  -3   6    2.02    1.86
   1   3  -6    5.53    1.71
   1   3  -6    6.53    2.18
   1   3  -6    6.82    1.18
   1   3  -5   23.31    2.36
  -1  -3   5   22.69    2.19
  -1  -3   5   30.70    2.79
   1   3  -5   26.97    1.87
   1   3  -5   24.69    1.81
   1   3  -4  275.65   12.86
   1   3  -4  302.19   13.21
  -1  -3   4  273.44   13.29
   1   3  -3  478.93   21.99
  -1  -3   3  473.64   22.26
   1   3  -3  522.84   22.19
  -1  -3   2 1759.69   79.41
   1   3  -2 1822.72   79.31
  -1  -3   1   10.79    1.45
  -1  -3   1   10.51    1.40
   1   3  -1    7.56    1.22
  -1  -3   0  129.20    6.36
   1   3   0  138.83    6.20
  -1  -3  -1  188.89    8.69
  -1  -3  -2  607.51   27.17
   1   3   2  626.96   27.44
   1   3   3   46.77    2.74
  -1  -3  -3   43.79    2.18
   1   3   4  160.09    7.45
  -1  -3  -4  147.18    7.14
   1   3   5  212.98    9.08
  -1  -3  -5  201.71    8.83
  -1  -3  -6  190.88    9.68
   1   3   6  213.38    9.47
  -1  -3  -7  993.86   42.09
   1   3   7  932.59   41.57
   1   3   7  915.83   41.60
   1   3   8    9.41    3.08
  -1  -3  -8    7.13    0.86
  -1  -3  -8    7.92    2.14
   1   3   8    6.82    1.11
   1   3   8    7.11    1.26
   1   3   8    9.65    1.19
   1   3   9   29.75    3.49
  -1  -3  -9   26.49    2.85
   1   3   9   22.03    1.70
   1   3  10  244.76   11.67
  -1  -3 -10  234.14   11.38
   1   3  10  217.55   10.24
   1   3  11  100.58    6.38
   1   3  11   99.37    4.86
  -1  -3 -11   93.00    6.00
   1   3  12   23.48    3.49
  -1  -3 -12   22.77    1.93
   1   3  12   20.48    2.63
   1   3  12   20.02    1.81
  -1  -3 -12   21.49    2.96
   1   3  13   54.78    5.03
  -1  -3 -13   55.91    3.56
   1   3  13   59.17    4.10
   1   3  13   64.94    3.47
  -1  -3 -13   60.22    4.70
   1   3  14   16.60    3.56
  -1  -3 -14   20.11    2.17
   1   3  14   18.02    2.91
   1   3  14   18.36    2.07
  -1  -3 -14   20.65    3.21
   1   3  15    5.42    3.16
  -1  -3 -15    4.72    1.99
   1   3  15    4.30    2.51
   1   3  15    3.24    1.79
  -1  -3 -15    6.66    2.61
   1   3  16    0.50    3.01
   1   3  16   -1.94    2.49
   1   3  16    4.97    2.47
  -1  -3 -16    0.18    2.33
  -1  -3 -16    1.42    1.88
   1   3  16   -1.13    1.79
  -1  -3 -17   41.93    3.07
   1   3  17   37.92    2.83
   1   3  17   40.73    3.39
   1   3  17   40.30    3.42
  -1  -3 -18    1.79    1.91
   1   3  18    4.62    1.55
   1   3  18    2.07    2.23
  -1  -3 -19   47.85    3.02
   1   3  19   44.27    2.78
   1   3  19   44.96    3.22
   1   3  20   24.55    1.77
  -1  -3 -20   25.01    1.97
   1   3  20   20.47    2.01
  -1  -3 -20   21.75    1.77
  -1  -3 -21   22.53    1.63
   1   3  21   24.08    1.62
  -1  -3 -21   19.89    1.50
  -1  -3 -22    3.26    0.60
   1   3  22    2.62    0.66
   1   4 -19   11.01    0.93
  -1  -4  19    8.88    0.87
   1   4 -19    9.18    0.80
   1   4 -18   57.17    3.19
  -1  -4  18   58.46    3.21
  -1  -4  18   63.51    3.17
   1   4 -18   63.33    3.15
   1   4 -17    1.82    1.33
  -1  -4  17   -0.56    1.42
   1   4 -17    1.15    1.11
  -1  -4  17    1.29    1.14
   1   4 -16   36.95    2.64
  -1  -4  16   37.59    2.76
   1   4 -16   38.97    2.55
  -1  -4  16   41.06    2.74
  -1  -4  15    0.26    1.74
   1   4 -15   -2.18    1.76
  -1  -4  14    1.43    1.86
   1   4 -14    1.06    1.89
   1   4 -14    0.90    1.81
  -1  -4  13   11.58    2.18
   1   4 -13   11.28    2.50
   1   4 -13   12.38    2.16
  -1  -4  12    2.07    1.89
   1   4 -12    0.86    2.01
   1   4 -12    2.13    1.72
  -1  -4  11  208.12   10.18
   1   4 -11  220.95   10.15
   1   4 -11  194.93   11.16
  -1  -4  10   81.76    4.58
   1   4 -10   80.12    5.37
   1   4 -10   87.20    4.59
   1   4 -10   80.18    5.06
   1   4  -9  142.44    7.54
   1   4  -9  138.12    7.79
  -1  -4   9  132.72    6.92
   1   4  -9  151.57    6.96
  -1  -4   9  135.96    7.24
  -1  -4   8  427.39   20.49
   1   4  -8  467.11   20.86
   1   4  -8  450.17   21.00
  -1  -4   7  198.03    9.17
   1   4  -7  202.53   10.07
   1   4  -7  205.75   10.15
  -1  -4   7  205.95    9.75
  -1  -4   6  545.94   24.54
   1   4  -6  567.63   25.41
  -1  -4   6  545.91   25.04
  -1  -4   6  584.66   25.77
   1   4  -5  147.62    7.21
  -1  -4   5  152.73    7.33
   1   4  -5  145.28    7.75
  -1  -4   5  145.60    7.88
   1   4  -4    8.89    1.98
  -1  -4   4   11.68    2.14
   1   4  -4   11.90    1.59
   1   4  -3   50.65    3.05
  -1  -4   3   42.30    3.11
   1   4  -2  144.68    6.89
  -1  -4   2  134.64    6.93
  -1  -4   2  141.53    6.93
  -1  -4   1   96.43    5.31
  -1  -4   1  100.55    5.35
  -1  -4   0  139.43    6.72
  -1  -4  -1    8.36    1.42
   1   4   2  341.44   15.61
  -1  -4  -3    2.13    0.86
   1   4   3    3.11    1.75
  -1  -4  -4  333.71   13.63
   1   4   4  340.29   13.94
  -1  -4  -5  131.62    6.42
   1   4   5  133.10    6.74
  -1  -4  -6 2570.23  116.85
   1   4   6 2740.75  117.08
   1   4   7  111.67    5.66
  -1  -4  -7  112.31    5.94
   1   4   8 1296.14   55.16
   1   4   8 1199.67   54.79
  -1  -4  -8 1332.62   55.62
   1   4   9   21.37    1.84
   1   4   9   19.51    1.57
   1   4   9   24.46    1.82
  -1  -4  -9   20.02    1.45
  -1  -4 -10   53.09    3.74
   1   4  10   43.84    2.60
   1   4  10   55.26    4.46
  -1  -4 -11   73.17    4.53
   1   4  11   70.19    5.12
   1   4  11   56.75    3.26
   1   4  12   -0.16    1.23
   1   4  12    1.17    2.10
  -1  -4 -12    0.95    1.28
  -1  -4 -12    4.05    2.19
   1   4  12   -2.84    3.03
   1   4  13   17.06    1.86
   1   4  13   15.90    2.84
  -1  -4 -13   22.63    3.09
  -1  -4 -13   22.29    2.08
   1   4  13   19.03    3.74
   1   4  14   -0.08    1.60
   1   4  14    2.66    2.51
  -1  -4 -14    1.50    1.73
  -1  -4 -14    1.55    2.30
   1   4  14   -1.15    3.26
   1   4  15   -0.48    1.75
   1   4  15    4.50    2.72
  -1  -4 -15    1.35    2.37
  -1  -4 -15    0.76    1.90
   1   4  15    1.05    3.27
   1   4  16  126.91    6.10
   1   4  16  119.35    6.56
  -1  -4 -16  111.37    7.60
  -1  -4 -16  114.00    6.23
   1   4  16  101.63    7.82
   1   4  17   11.45    2.79
   1   4  17    8.30    2.64
   1   4  17    9.17    1.83
  -1  -4 -17   11.39    2.26
  -1  -4 -17    7.67    2.60
  -1  -4 -18  141.57    7.18
   1   4  18  146.08    7.43
   1   4  18  137.61    7.24
   1   4  18  142.32    7.01
  -1  -4 -19    4.98    1.81
   1   4  19    3.67    2.08
   1   4  19    2.66    1.39
  -1  -4 -20    9.63    1.49
  -1  -4 -20   13.09    1.67
   1   4  20   10.14    1.80
   1   4  20    9.90    1.37
  -1  -4 -21    0.40    1.03
   1   4  21    1.54    1.08
  -1  -4 -21    0.78    1.10
   1   4  22    0.35    0.60
  -1  -4 -22   -0.62    0.69
   1   5 -18   14.09    1.12
  -1  -5  18   13.89    1.10
   1   5 -18   15.04    1.21
  -1  -5  18   14.17    1.18
  -1  -5  17   72.33    3.55
  -1  -5  17   73.12    3.69
   1   5 -17   66.77    3.70
  -1  -5  17   70.83    3.72
  -1  -5  16   -0.28    1.07
  -1  -5  16    0.85    1.32
   1   5 -16    1.05    1.41
  -1  -5  16   -0.47    1.46
  -1  -5  15    4.80    1.31
  -1  -5  15    5.53    1.66
  -1  -5  15    6.36    1.34
  -1  -5  15    5.16    1.74
   1   5 -15    4.97    1.70
  -1  -5  14    2.36    1.71
  -1  -5  14    0.62    1.80
   1   5 -14    0.56    1.73
  -1  -5  14    1.61    1.32
  -1  -5  13    2.65    1.82
   1   5 -13    1.58    1.84
   1   5 -13    3.15    1.88
  -1  -5  13    3.16    1.48
  -1  -5  12   59.44    3.85
   1   5 -12   52.52    4.50
   1   5 -12   57.95    3.87
  -1  -5  12   66.49    3.47
  -1  -5  11    0.63    1.67
   1   5 -11   -0.81    2.06
   1   5 -11    0.92    1.84
  -1  -5  11    1.19    1.34
  -1  -5  10    0.93    1.59
   1   5 -10   -0.25    2.00
   1   5 -10    0.10    1.72
   1   5 -10    0.67    1.75
  -1  -5  10    0.75    1.28
  -1  -5   9   77.97    4.33
   1   5  -9   79.84    5.16
   1   5  -9   73.59    4.96
  -1  -5   9   71.11    3.94
   1   5  -8   59.98    3.80
  -1  -5   8   52.97    2.62
   1   5  -8   39.16    3.42
  -1  -5   8   46.63    2.88
   1   5  -8   45.05    2.97
  -1  -5   8   37.70    2.91
  -1  -5   7  239.83   10.95
   1   5  -7  254.32   12.01
   1   5  -7  237.50   12.00
  -1  -5   7  240.07   11.39
  -1  -5   6  872.88   38.35
   1   5  -6  853.93   39.25
  -1  -5   6  839.73   38.74
  -1  -5   6  906.51   39.62
  -1  -5   5  261.46   13.54
   1   5  -5  273.39   12.99
  -1  -5   5  283.11   12.93
   1   5  -5  279.61   13.45
  -1  -5   5  285.66   12.91
   1   5  -4   79.31    4.70
  -1  -5   4   69.72    4.74
   1   5  -4   78.81    4.34
   1   5  -3  196.29    9.88
  -1  -5   3  211.13   10.01
   1   5  -2    5.59    1.75
  -1  -5   2    5.12    1.68
  -1  -5   2    2.81    1.52
   1   5  -1  398.03   17.42
  -1  -5   1  376.25   17.46
  -1  -5   1  365.00   17.43
  -1  -5   0  135.01    6.58
  -1  -5   0  131.08    6.56
  -1  -5  -1  135.69    6.68
   1   5   2  125.26    6.10
  -1  -5  -2  116.08    5.97
   1   5   3  393.86   18.06
   1   5   4  846.96   38.01
   1   5   5 1057.72   42.90
  -1  -5  -5 1055.60   42.60
  -1  -5  -6    2.24    1.30
   1   5   6    2.52    2.24
  -1  -5  -7  148.36    7.58
   1   5   7  156.61    8.20
   1   5   8    2.58    3.18
  -1  -5  -8    2.77    1.89
   1   5   8    3.75    1.02
   1   5   8    3.91    1.87
   1   5   9   58.64    3.46
  -1  -5  -9   48.92    3.71
   1   5   9   58.21    2.80
  -1  -5  -9   43.44    2.94
  -1  -5 -10    9.30    2.13
   1   5  10    9.19    1.58
   1   5  10    9.20    1.24
  -1  -5 -11   66.65    4.14
   1   5  11   46.16    2.78
   1   5  12  182.58    8.42
   1   5  12  176.79    8.82
  -1  -5 -12  174.58    9.64
  -1  -5 -12  179.95    8.53
   1   5  12  172.98   10.18
   1   5  13   17.14    1.75
   1   5  13   16.09    2.70
  -1  -5 -13   17.26    2.85
  -1  -5 -13   17.10    1.89
   1   5  13   12.82    3.68
   1   5  14   58.59    3.52
   1   5  14   60.79    4.37
  -1  -5 -14   63.20    5.05
  -1  -5 -14   66.59    3.83
   1   5  14   56.73    5.53
   1   5  15   78.83    4.45
   1   5  15   82.27    5.13
  -1  -5 -15   76.30    5.97
  -1  -5 -15   84.88    4.62
   1   5  15   79.70    6.60
   1   5  16   39.76    2.82
   1   5  16   46.16    3.85
  -1  -5 -16   36.61    4.19
  -1  -5 -16   34.78    3.08
   1   5  16   33.35    4.73
   1   5  17  133.65    6.60
   1   5  17  131.28    7.05
  -1  -5 -17  116.32    8.15
   1   5  17  116.84    8.52
  -1  -5 -17  138.02    6.86
  -1  -5 -18    1.17    2.02
   1   5  18   -1.60    2.36
   1   5  18    2.96    2.35
   1   5  18    1.12    1.53
  -1  -5 -19    3.13    1.83
   1   5  19    4.79    2.18
   1   5  19    5.04    1.51
  -1  -5 -20   16.03    1.80
  -1  -5 -20   19.77    1.92
   1   5  20   18.11    2.10
   1   5  20   17.67    1.63
  -1  -5 -21    2.61    1.15
   1   5  21    2.85    1.06
  -1  -5 -21    3.98    1.22
   1   5  21    1.82    1.30
   1   5  21    1.35    0.94
  -1  -5 -22    4.38    0.86
   1   5  22    3.85    0.79
  -1  -5 -22    2.74    0.85
  -1  -6  18    0.55    0.49
   1   6 -18    1.00    0.50
  -1  -6  17   -0.12    0.84
  -1  -6  17    1.22    0.89
   1   6 -17    0.29    0.91
  -1  -6  16    3.75    1.17
  -1  -6  16    4.33    1.01
  -1  -6  16    5.76    1.25
   1   6 -16    4.71    1.28
  -1  -6  15    5.63    1.47
  -1  -6  15    5.63    1.22
  -1  -6  15    4.12    1.50
   1   6 -15    6.18    1.59
  -1  -6  14    3.31    1.23
   1   6 -14    4.46    1.52
  -1  -6  14    2.97    1.77
   1   6 -14    4.74    1.76
   1   6 -13   18.44    1.95
   1   6 -13   20.98    2.27
  -1  -6  13   20.18    1.79
  -1  -6  13   14.83    2.12
   1   6 -12   33.68    2.55
   1   6 -12   34.43    2.74
  -1  -6  12   27.95    2.71
  -1  -6  12   36.59    2.32
   1   6 -12   24.32    3.03
   1   6 -11   18.83    2.00
   1   6 -11   12.73    2.22
  -1  -6  11   15.94    2.22
  -1  -6  11   15.57    1.71
   1   6 -11    9.76    2.38
   1   6 -10   27.29    2.29
   1   6 -10   30.84    2.63
  -1  -6  10   27.32    2.37
   1   6 -10   23.51    3.07
  -1  -6  10   23.72    1.96
   1   6 -10   27.76    3.11
   1   6  -9   73.83    4.02
  -1  -6   9   70.89    4.06
   1   6  -9   57.50    4.66
   1   6  -9   72.80    4.24
  -1  -6   9   73.38    3.72
   1   6  -9   72.82    4.97
  -1  -6   8    9.62    1.66
   1   6  -8   10.46    2.08
   1   6  -8   10.23    1.85
   1   6  -8   12.10    2.26
  -1  -6   8   10.74    1.28
  -1  -6   7    1.35    1.22
   1   6  -7    0.72    1.52
   1   6  -7    1.11    1.86
  -1  -6   7    0.39    1.00
   1   6  -7    1.57    1.69
  -1  -6   6  165.27    9.39
  -1  -6   6  175.57    8.12
   1   6  -6  193.83    9.22
  -1  -6   5    1.05    1.09
  -1  -6   5   -0.65    1.27
   1   6  -5   -0.40    1.98
  -1  -6   5    0.87    2.05
   1   6  -5    1.42    1.68
  -1  -6   4  166.97    8.83
   1   6  -4  177.57    8.75
  -1  -6   4  174.42    8.08
   1   6  -4  157.97    8.41
  -1  -6   3    7.35    2.26
   1   6  -3    7.22    2.45
  -1  -6   2    9.90    2.21
  -1  -6   2   14.51    2.32
   1   6  -2   10.51    2.58
  -1  -6   1  308.33   14.71
  -1  -6   1  314.85   14.76
   1   6  -1  317.29   14.70
  -1  -6   0    1.88    1.42
  -1  -6   0    0.50    1.54
  -1  -6  -1  403.12   18.53
  -1  -6  -2   76.45    4.28
   1   6   3  450.96   16.69
  -1  -6  -3  292.65   16.33
   1   6   4  336.04   15.74
   1   6   5  125.00    6.77
   1   6   6   35.01    3.36
  -1  -6  -6   31.72    2.35
  -1  -6  -7   24.54    2.32
   1   6   7   22.88    3.49
  -1  -6  -8    2.55    1.80
   1   6   8    2.03    0.94
   1   6   9   15.82    2.25
   1   6   9   13.81    3.43
  -1  -6  -9   14.92    1.77
  -1  -6  -9   14.70    2.18
   1   6   9   15.64    1.34
   1   6  10  176.57    8.13
   1   6  10  164.62    7.45
  -1  -6 -10  154.42    8.49
  -1  -6 -10  144.97    7.75
   1   6  10  161.66    9.19
  -1  -6 -11  114.03    6.89
   1   6  11  123.07    5.80
   1   6  12    0.60    1.17
   1   6  12    0.73    2.14
  -1  -6 -12    0.16    1.32
  -1  -6 -12    0.74    1.87
  -1  -6 -13   23.75    3.10
   1   6  13   27.28    3.11
  -1  -6 -13   31.34    2.03
   1   6  13   28.05    2.08
   1   6  13   24.13    4.41
  -1  -6 -13   23.87    2.29
  -1  -6 -14   16.41    3.02
   1   6  14   13.48    2.98
  -1  -6 -14   20.88    1.83
  -1  -6 -14   17.82    2.21
   1   6  14   16.11    4.04
   1   6  14   16.48    1.90
   1   6  15    2.04    1.57
   1   6  15   -0.26    2.85
  -1  -6 -15    1.89    1.81
  -1  -6 -15   -0.50    2.39
   1   6  15    6.32    3.78
   1   6  16    1.93    1.63
   1   6  16    6.29    3.03
  -1  -6 -16    2.40    2.04
  -1  -6 -16    0.18    2.25
   1   6  16    2.68    3.63
   1   6  17   28.81    2.56
   1   6  17   40.02    3.63
  -1  -6 -17   37.74    4.06
   1   6  17   33.64    4.78
  -1  -6 -17   38.89    3.08
  -1  -6 -18   37.17    3.07
   1   6  18   34.95    3.32
   1   6  18   40.51    2.73
  -1  -6 -19   -0.42    1.75
   1   6  19    2.59    2.07
   1   6  19    3.94    2.22
   1   6  19    1.07    1.39
  -1  -6 -20    1.98    1.43
  -1  -6 -20    2.64    1.62
   1   6  20    3.33    1.83
   1   6  20    1.59    1.24
  -1  -6 -21   62.66    3.43
   1   6  21   68.22    3.60
  -1  -6 -21   63.18    3.49
  -1  -6 -22    0.89    0.84
   1   6  22    2.22    0.85
  -1  -6 -22    0.71    0.86
  -1  -7  17    0.63    0.61
   1   7 -17    0.60    0.61
   1   7 -16    0.24    0.86
  -1  -7  16   -0.18    0.90
   1   7 -16    0.55    0.97
  -1  -7  16    0.75    0.90
  -1  -7  15   11.51    1.21
  -1  -7  15   12.96    1.46
   1   7 -15   10.23    1.35
   1   7 -15   12.35    1.50
  -1  -7  15   12.56    1.50
  -1  -7  14    7.31    1.43
   1   7 -14    5.92    1.47
  -1  -7  14    7.94    1.28
  -1  -7  14    4.65    1.59
   1   7 -14    7.59    1.64
   1   7 -13   36.89    2.67
  -1  -7  13   40.89    2.40
  -1  -7  13   33.72    2.69
   1   7 -13   35.98    2.78
   1   7 -12   45.45    3.12
   1   7 -12   54.07    3.35
  -1  -7  12   42.58    3.17
  -1  -7  12   46.66    2.79
   1   7 -11    5.11    1.94
  -1  -7  11    4.78    1.37
   1   7 -11    4.96    1.69
  -1  -7  11    5.07    1.89
  -1  -7  10   10.72    1.89
   1   7 -10   11.12    2.01
  -1  -7  10    5.95    1.88
   1   7 -10   10.39    1.80
  -1  -7  10    6.13    1.42
   1   7 -10   10.04    2.41
   1   7 -10    3.62    1.92
  -1  -7   9   45.08    3.01
   1   7  -9   45.93    3.02
   1   7  -9   51.35    3.25
  -1  -7   9   40.38    3.01
   1   7  -9   48.95    4.03
  -1  -7   9   41.02    2.60
   1   7  -9   37.12    3.51
  -1  -7   8  141.27    7.00
   1   7  -8  146.42    7.04
   1   7  -8  148.03    7.19
  -1  -7   8  129.94    6.95
   1   7  -8  160.65    8.33
  -1  -7   8  144.96    6.67
   1   7  -8  114.72    7.57
   1   7  -7   38.40    2.61
  -1  -7   7   38.46    2.56
   1   7  -7   40.16    2.78
  -1  -7   7   36.94    2.59
  -1  -7   7   37.56    2.22
   1   7  -7   42.40    3.69
   1   7  -7   31.06    3.11
   1   7  -6    0.86    1.54
  -1  -7   6    0.39    1.21
   1   7  -6    0.90    1.19
   1   7  -6    1.73    1.48
  -1  -7   6    2.02    0.99
  -1  -7   6   -0.36    2.13
  -1  -7   6    2.67    1.18
  -1  -7   5  311.05   14.98
   1   7  -5  328.82   15.38
  -1  -7   5  315.50   14.30
  -1  -7   5  337.99   15.77
   1   7  -4   81.05    4.51
  -1  -7   4   79.10    4.96
   1   7  -4   69.53    4.55
  -1  -7   3   21.98    2.77
   1   7  -3   19.42    2.79
  -1  -7   2   28.73    2.88
   1   7  -2   30.31    3.21
  -1  -7   1  680.77   30.05
  -1  -7   1  638.17   29.98
   1   7  -1  654.25   29.92
  -1  -7   0    3.85    1.92
  -1  -7   0    3.96    1.96
  -1  -7  -1  278.56   13.32
  -1  -7  -2  238.99   11.55
   1   7   3   38.68    3.39
  -1  -7  -3   46.53    3.20
   1   7   4  119.87    6.14
  -1  -7  -4   96.39    5.73
   1   7   5    1.64    2.74
   1   7   6    4.88    2.91
   1   7   7  158.28    7.20
   1   7   7  149.52    8.57
   1   7   8   59.37    2.97
   1   7   8   58.18    4.96
  -1  -7  -9   93.40    4.49
  -1  -7  -9  102.79    5.64
   1   7   9   93.85    6.39
  -1  -7  -9  102.66    5.28
   1   7   9   93.72    4.53
  -1  -7 -10   17.21    2.43
   1   7  10   17.67    2.26
   1   7  10   17.97    1.36
   1   7  10   15.83    3.48
  -1  -7 -10   13.15    1.84
   1   7  11  202.73    9.91
   1   7  11  209.46    9.19
  -1  -7 -11  170.81    9.55
   1   7  11  205.46   11.19
  -1  -7 -11  211.73   10.51
  -1  -7 -12   47.28    3.99
   1   7  12   43.63    3.34
  -1  -7 -12   44.35    2.66
   1   7  12   45.28    2.61
   1   7  12   42.63    4.85
  -1  -7 -12   46.24    2.90
  -1  -7 -13    3.07    1.34
   1   7  13    1.44    1.30
   1   7  13    3.22    2.46
  -1  -7 -13    0.76    1.62
  -1  -7 -13    2.68    2.08
  -1  -7 -14    2.12    1.34
   1   7  14    1.17    1.42
   1   7  14    2.29    2.79
  -1  -7 -14    1.16    1.72
  -1  -7 -14    0.94    2.27
  -1  -7 -15    6.62    2.02
  -1  -7 -15    7.12    1.61
   1   7  15    5.51    2.95
   1   7  15    5.23    1.65
   1   7  15    9.62    3.99
  -1  -7 -15    6.79    2.61
  -1  -7 -16   18.90    3.25
   1   7  16   15.42    3.25
   1   7  16   23.79    4.57
  -1  -7 -16   23.65    2.49
   1   7  16   15.20    2.01
   1   7  17   33.56    3.51
   1   7  17   34.13    2.52
  -1  -7 -17   30.45    2.82
   1   7  18   46.64    3.03
   1   7  18   41.81    3.23
  -1  -7 -18   54.36    3.53
   1   7  18   54.02    3.85
  -1  -7 -19    1.51    1.91
   1   7  19    3.72    2.23
   1   7  19   -2.03    2.11
   1   7  19    1.79    1.43
  -1  -7 -20    1.57    1.46
  -1  -7 -20    0.77    1.62
   1   7  20   -0.07    1.70
   1   7  20    3.43    1.93
   1   7  20    1.00    1.19
  -1  -7 -21    0.93    1.24
   1   7  21    1.09    1.41
  -1  -7 -21    3.17    1.34
  -1  -7 -22   26.17    1.68
   1   7  22   26.26    1.67
  -1  -7 -22   29.19    1.68
   1   8 -16   17.24    1.14
  -1  -8  16   18.52    1.20
   1   8 -16   15.41    1.16
   1   8 -15   32.11    1.97
  -1  -8  15   32.77    2.04
   1   8 -15   31.24    2.04
  -1  -8  15   33.32    2.03
  -1  -8  14    7.54    1.29
  -1  -8  14    8.43    1.09
   1   8 -14    6.45    1.31
   1   8 -14    7.34    1.45
  -1  -8  14    7.84    1.43
  -1  -8  13    2.75    1.46
   1   8 -13    4.37    1.42
  -1  -8  13    4.42    1.12
  -1  -8  13    3.46    1.51
   1   8 -13    2.43    1.56
   1   8 -12   83.93    4.41
  -1  -8  12   79.19    4.09
  -1  -8  12   71.78    4.36
   1   8 -12   83.84    4.54
  -1  -8  11    3.06    1.70
  -1  -8  11    5.63    1.31
   1   8 -11    6.87    1.68
  -1  -8  11    3.72    1.79
   1   8 -11    6.39    2.02
   1   8 -10  112.59    5.83
  -1  -8  10  111.92    5.83
   1   8 -10  110.52    7.00
  -1  -8  10  113.49    5.48
  -1  -8  10  102.64    5.82
   1   8 -10  114.32    6.00
   1   8  -9  128.50    6.45
  -1  -8   9  114.06    6.40
   1   8  -9  133.02    6.66
  -1  -8   9  131.03    6.08
   1   8  -9  133.91    7.73
  -1  -8   9  115.74    6.38
  -1  -8   8    2.53    1.61
   1   8  -8    7.42    2.10
  -1  -8   8    1.72    1.59
   1   8  -8    4.72    1.68
   1   8  -8    5.48    2.39
  -1  -8   8    4.19    1.26
   1   8  -8    3.78    1.73
  -1  -8   7    0.65    1.43
   1   8  -7    0.65    1.78
  -1  -8   7   -0.51    1.50
   1   8  -7    1.27    1.50
  -1  -8   7    1.47    1.09
   1   8  -7    1.86    2.30
   1   8  -7    0.32    1.53
   1   8  -6   33.23    2.86
  -1  -8   6   33.72    2.38
   1   8  -6   33.57    2.47
  -1  -8   6   36.57    2.41
   1   8  -6   32.79    2.67
  -1  -8   6   29.91    2.00
  -1  -8   6   30.02    3.49
   1   8  -5   19.00    2.68
  -1  -8   5   29.65    2.22
  -1  -8   5   31.32    2.21
   1   8  -5   29.05    2.28
  -1  -8   5   42.88    3.73
  -1  -8   5   40.18    1.95
   1   8  -5   26.38    2.49
   1   8  -4    8.29    2.11
   1   8  -4    9.94    1.76
  -1  -8   4    7.46    1.33
  -1  -8   4   12.11    1.97
  -1  -8   4    6.45    2.23
   1   8  -4    7.62    2.08
  -1  -8   3    5.99    1.87
  -1  -8   3    5.93    2.12
  -1  -8   3    6.70    0.99
   1   8  -3    7.09    2.07
  -1  -8   2   15.77    2.51
   1   8  -2   16.75    2.51
  -1  -8   1    5.23    2.07
  -1  -8   1    3.13    2.04
   1   8  -1    5.21    2.32
  -1  -8   0   94.50    5.78
  -1  -8   0  101.02    5.82
   1   8   0  104.67    5.92
  -1  -8  -1   10.93    2.29
  -1  -8  -1   12.80    2.32
  -1  -8  -2   36.92    3.07
  -1  -8  -3   60.14    3.08
  -1  -8  -3   71.78    4.24
   1   8   4  261.96   12.50
  -1  -8  -4  279.06   12.52
  -1  -8  -4  248.10   11.41
   1   8   5   77.81    5.01
  -1  -8  -5   67.20    3.37
  -1  -8  -5   71.56    4.47
   1   8   6   17.15    3.10
  -1  -8  -6   14.35    2.17
  -1  -8  -6   12.39    1.22
  -1  -8  -7  748.29   32.61
   1   8   7  703.02   32.77
   1   8   7  781.21   33.91
   1   8   8    3.12    2.93
  -1  -8  -9   31.01    1.77
  -1  -8  -9   32.03    2.70
   1   8   9   33.33    4.04
   1   8   9   25.96    1.71
  -1  -8 -10  575.37   24.26
   1   8  10  543.22   24.37
   1   8  10  567.34   26.10
  -1  -8 -10  544.39   25.04
   1   8  10  574.64   25.34
   1   8  10  506.50   24.22
  -1  -8 -11   37.21    2.43
  -1  -8 -11   38.16    2.96
   1   8  11   37.14    4.56
   1   8  11   48.31    3.47
   1   8  11   39.84    2.27
   1   8  12   70.03    3.70
   1   8  12   80.22    6.29
  -1  -8 -12   73.68    3.87
  -1  -8 -13   45.95    2.93
  -1  -8 -13   42.76    3.16
   1   8  13   38.06    5.22
   1   8  13   45.51    3.75
  -1  -8 -14   11.90    1.69
   1   8  14    8.79    2.97
   1   8  14    7.95    1.57
   1   8  14   15.23    4.26
  -1  -8 -14   11.54    2.12
   1   8  15  144.52    6.86
  -1  -8 -15  133.92    7.16
   1   8  15  134.77    7.59
  -1  -8 -15  140.32    6.88
   1   8  16    7.99    1.68
   1   8  16    5.23    4.19
   1   8  16    8.29    3.01
  -1  -8 -16    8.06    2.11
  -1  -8 -17   78.85    4.34
   1   8  17   63.01    3.85
   1   8  17   66.55    4.74
   1   8  17   71.91    6.65
   1   8  18   32.63    2.49
   1   8  18   39.95    3.49
   1   8  18   30.96    2.95
  -1  -8 -18   37.64    3.05
   1   8  19   19.52    2.59
   1   8  19   16.17    2.07
  -1  -8 -19   18.59    2.36
  -1  -8 -20    4.79    1.69
   1   8  20    8.13    2.09
   1   8  20    4.66    1.83
  -1  -8 -21   16.47    1.59
  -1  -8 -21   14.97    1.68
   1   8  21   15.90    1.82
  -1  -8 -21   13.97    1.18
  -1  -8 -22   22.79    1.58
   1   8  22   21.39    1.61
  -1  -8 -22   23.39    1.59
   1   9 -15    1.98    0.74
   1   9 -15    1.06    0.65
  -1  -9  15    0.50    0.72
   1   9 -14    1.00    0.91
   1   9 -14    1.00    1.04
  -1  -9  14   -0.50    1.00
  -1  -9  14    1.70    1.05
   1   9 -13    2.32    1.09
  -1  -9  13    0.99    1.20
   1   9 -13    1.63    1.31
  -1  -9  13    3.58    1.34
   1   9 -12   -0.86    1.31
  -1  -9  12   -0.09    1.46
   1   9 -12    0.45    1.55
  -1  -9  12    0.72    1.04
  -1  -9  12    1.20    1.45
   1   9 -11   35.92    2.73
   1   9 -11   35.42    2.55
  -1  -9  11   33.26    2.61
  -1  -9  11   33.04    2.15
  -1  -9  11   32.66    2.58
   1   9 -10    2.54    1.88
  -1  -9  10    2.38    1.64
   1   9 -10    4.15    1.57
  -1  -9  10    4.18    1.23
  -1  -9  10    2.43    1.57
   1   9  -9   -1.04    1.90
   1   9  -9   -0.97    1.68
  -1  -9   9    0.36    1.62
   1   9  -9   -2.28    2.51
  -1  -9   9    1.28    1.22
  -1  -9   9    1.38    1.65
   1   9  -8   48.34    3.36
  -1  -9   8   41.77    2.91
   1   9  -8   42.13    2.92
   1   9  -8   38.99    4.05
  -1  -9   8   37.70    2.42
  -1  -9   8   39.55    2.91
   1   9  -7   56.16    3.72
  -1  -9   7   52.63    3.30
   1   9  -7   52.90    3.43
   1   9  -7   57.35    4.62
  -1  -9   7   49.72    2.88
  -1  -9   7   51.47    3.28
  -1  -9   6   83.75    4.70
  -1  -9   6   87.35    4.74
   1   9  -6   83.45    4.81
   1   9  -6   83.02    5.01
  -1  -9   6   93.97    4.37
   1   9  -6   99.47    6.16
  -1  -9   6   89.32    6.34
   1   9  -5   13.33    2.03
  -1  -9   5   14.38    1.69
   1   9  -5   13.03    1.82
  -1  -9   5   15.13    1.72
   1   9  -5   16.52    2.17
  -1  -9   5   11.29    1.27
  -1  -9   5    8.59    2.64
  -1  -9   4    4.04    0.98
   1   9  -4    4.56    2.08
   1   9  -4    2.80    1.69
  -1  -9   4    4.41    1.31
   1   9  -4    2.69    1.41
  -1  -9   4    3.30    1.21
   1   9  -4    4.07    1.77
  -1  -9   4    2.71    2.29
  -1  -9   4    2.11    1.69
   1   9  -3    8.81    2.00
  -1  -9   3    7.42    1.10
  -1  -9   3    9.96    1.39
   1   9  -3    8.96    1.81
  -1  -9   3   10.11    2.43
  -1  -9   3    5.31    1.90
  -1  -9   3   10.14    1.34
   1   9  -3   10.23    1.53
  -1  -9   2    0.72    0.99
   1   9  -2    1.27    1.84
  -1  -9   2    1.35    1.97
  -1  -9   2   -0.37    1.85
  -1  -9   1   23.82    1.77
   1   9  -1   24.86    2.75
  -1  -9   1   34.61    3.14
  -1  -9   1   31.82    3.06
  -1  -9   1   26.07    2.75
   1   9   0    1.94    2.03
  -1  -9   0    5.80    2.04
  -1  -9   0    3.12    1.96
  -1  -9  -1   97.33    5.61
  -1  -9  -1  106.28    5.72
  -1  -9  -2   56.73    4.09
  -1  -9  -2   58.59    4.15
  -1  -9  -3   47.96    3.53
  -1  -9  -3   44.22    2.38
  -1  -9  -4   65.09    3.33
  -1  -9  -4   77.03    4.59
  -1  -9  -5    7.61    1.01
  -1  -9  -5    6.11    1.96
   1   9   5    6.82    2.68
  -1  -9  -6  112.33    6.50
  -1  -9  -6  109.45    5.31
  -1  -9  -7  329.53   14.68
  -1  -9  -7  340.63   15.91
   1   9   7  313.79   14.98
   1   9   7  328.35   16.03
  -1  -9  -8   11.17    1.29
  -1  -9  -8   16.26    1.26
   1   9   8   10.15    3.07
  -1  -9  -8    8.42    2.15
  -1  -9  -9    6.48    1.06
  -1  -9  -9    2.22    0.97
   1   9   9    6.87    3.02
  -1  -9  -9    9.57    2.02
  -1  -9 -10    5.40    1.04
  -1  -9 -10    5.52    1.24
  -1  -9 -10    6.85    1.87
   1   9  10    2.46    3.20
   1   9  11   94.61    6.36
  -1  -9 -11  111.21    5.27
   1   9  11  112.56    5.47
  -1  -9 -11  106.19    6.16
   1   9  11  115.90    7.67
  -1  -9 -11  111.25    5.48
  -1  -9 -12   32.37    2.62
  -1  -9 -12   24.03    2.08
   1   9  12   25.61    3.00
   1   9  13  361.76   16.28
   1   9  13  309.33   18.55
  -1  -9 -13  362.82   16.59
  -1  -9 -13  363.59   16.44
  -1  -9 -14  205.75    9.58
  -1  -9 -14  206.11    9.80
   1   9  14  210.16    9.45
   1   9  14  183.63   10.08
  -1  -9 -15   16.54    1.95
   1   9  15   15.93    3.18
   1   9  15   14.89    1.74
   1   9  15   16.48    4.50
  -1  -9 -15   13.59    2.31
   1   9  16    2.33    1.42
   1   9  16    6.95    3.07
  -1  -9 -16    6.31    1.66
  -1  -9 -16    4.40    2.14
   1   9  17   13.75    3.08
  -1  -9 -17   13.52    2.29
   1   9  18    6.72    2.77
  -1  -9 -18    5.40    2.13
   1   9  19   23.16    2.72
  -1  -9 -19   23.87    2.47
   1   9  19   19.76    2.35
  -1  -9 -20    2.03    1.36
  -1  -9 -20    0.20    0.90
  -1  -9 -20    0.75    1.62
   1   9  20    0.15    1.80
   1   9  20    3.36    1.91
  -1  -9 -21    0.31    1.28
   1   9  21   -1.31    1.29
   1   9  21    0.53    1.40
  -1  -9 -22    2.84    0.95
   1   9  22    0.46    0.99
   1  10 -14   11.55    0.93
   1  10 -14   10.60    0.98
  -1 -10  14    9.70    0.98
  -1 -10  14    8.22    0.96
   1  10 -13    0.87    0.92
   1  10 -13    1.91    1.05
  -1 -10  13    0.77    1.03
  -1 -10  13    0.26    1.02
   1  10 -12    6.67    1.40
   1  10 -12    4.52    1.18
  -1 -10  12    4.06    1.25
   1  10 -11    3.23    1.65
  -1 -10  11    1.31    1.41
   1  10 -11    3.40    1.38
  -1 -10  11    2.61    1.42
   1  10 -10   14.46    2.08
  -1 -10  10   14.11    1.98
   1  10 -10   12.95    1.87
  -1 -10  10   18.29    1.46
  -1 -10  10   15.41    1.91
   1  10  -9   32.08    2.69
  -1 -10   9   25.53    2.35
   1  10  -9   25.43    2.34
  -1 -10   9   23.86    1.81
  -1 -10   9   25.91    2.34
   1  10  -8    0.19    1.93
   1  10  -8    2.26    1.66
  -1 -10   8   -0.05    1.67
   1  10  -8    0.16    2.38
  -1 -10   8    0.22    1.07
  -1 -10   8    1.16    1.63
   1  10  -7   13.08    2.33
   1  10  -7   12.08    1.94
  -1 -10   7   11.71    1.83
  -1 -10   7   14.21    1.44
   1  10  -7   14.07    2.98
  -1 -10   7   12.04    1.93
  -1 -10   6   48.50    3.24
   1  10  -6   48.65    3.63
  -1 -10   6   50.87    3.22
   1  10  -6   51.68    3.35
   1  10  -6   53.75    4.57
  -1 -10   6   49.14    2.74
  -1 -10   6   46.37    4.71
  -1 -10   5   16.10    1.86
   1  10  -5   16.88    2.35
  -1 -10   5   14.84    1.88
   1  10  -5   12.75    2.02
   1  10  -5    9.37    2.74
  -1 -10   5   12.99    1.32
  -1 -10   5   12.08    3.16
  -1 -10   4   55.84    3.19
   1  10  -4   48.93    3.29
  -1 -10   4   49.49    3.13
   1  10  -4   50.64    3.59
  -1 -10   4   49.10    2.67
  -1 -10   4   50.79    4.61
  -1 -10   3   17.03    1.32
   1  10  -3   16.97    2.93
  -1 -10   3   19.49    1.64
   1  10  -3   17.45    1.82
  -1 -10   3   15.64    1.74
  -1 -10   3   17.61    1.75
   1  10  -3   20.20    1.98
   1  10  -3   17.66    2.20
  -1 -10   3   21.81    3.22
  -1 -10   3   16.17    2.55
  -1 -10   2   13.15    1.40
  -1 -10   2   14.03    1.59
   1  10  -2   14.70    1.73
  -1 -10   2   12.67    1.53
   1  10  -2   15.04    2.10
  -1 -10   2   13.14    2.58
  -1 -10   2   13.60    2.40
  -1 -10   1   47.02    2.72
  -1 -10   1   46.45    2.83
   1  10  -1   47.76    2.97
  -1 -10   1   44.29    3.79
  -1 -10   1   46.09    3.97
   1  10  -1   55.80    3.29
   1  10   0  355.34   14.81
  -1 -10   0  318.20   14.52
  -1 -10   0  321.21   14.41
  -1 -10   0  353.78   15.88
  -1 -10   0  332.57   15.77
  -1 -10   0  298.17   15.43
  -1 -10  -1   62.54    3.20
   1  10   1   49.55    3.98
  -1 -10  -1   63.67    4.43
  -1 -10  -1   61.33    4.39
  -1 -10  -1   54.63    4.23
  -1 -10  -2  346.82   17.20
  -1 -10  -2  364.31   17.33
  -1 -10  -3    2.83    1.98
  -1 -10  -3    2.06    1.98
  -1 -10  -4  335.41   15.21
  -1 -10  -4  300.22   13.75
  -1 -10  -5    1.53    1.85
  -1 -10  -5    2.73    0.95
  -1 -10  -6   16.73    2.47
  -1 -10  -6   14.09    1.23
   1  10   6   16.36    2.86
  -1 -10  -7   49.73    2.70
   1  10   7   46.99    4.23
  -1 -10  -7   46.78    3.77
  -1 -10  -7   47.46    2.57
  -1 -10  -7   47.97    3.84
   1  10   7   43.77    2.95
  -1 -10  -8   69.27    3.61
  -1 -10  -8   68.78    3.59
  -1 -10  -8   69.41    3.46
  -1 -10  -8   73.16    4.89
  -1 -10  -8   63.28    4.59
   1  10   8   63.00    5.14
  -1 -10  -9    1.02    1.09
  -1 -10  -9    0.29    1.06
  -1 -10  -9    0.71    0.85
  -1 -10  -9   -1.22    1.87
   1  10   9    1.25    2.89
  -1 -10  -9    1.04    1.83
  -1 -10 -10   91.97    4.60
   1  10  10  104.01    6.84
  -1 -10 -10   99.96    5.75
  -1 -10 -10  105.19    4.56
  -1 -10 -11   22.83    1.86
   1  10  11   20.13    4.08
  -1 -10 -11   20.45    2.61
   1  10  11   23.32    3.14
  -1 -10 -11   22.27    1.60
  -1 -10 -11   18.46    1.60
   1  10  11   18.48    1.98
   1  10  12  115.77    6.06
  -1 -10 -12  112.19    5.84
  -1 -10 -12  101.73    6.73
   1  10  12  110.16    8.29
  -1 -10 -12  129.70    5.78
  -1 -10 -12  134.72    6.95
  -1 -10 -12  130.90    6.16
   1  10  12  128.21    7.38
  -1 -10 -12  126.36    5.90
   1  10  13    3.54    4.04
  -1 -10 -13    1.73    1.56
   1  10  14    2.22    3.92
   1  10  14    0.18    2.88
  -1 -10 -14    1.26    1.63
   1  10  15    1.41    3.86
   1  10  15    4.53    3.04
  -1 -10 -15    6.11    1.72
   1  10  16   17.68    4.71
  -1 -10 -16   16.21    2.00
   1  10  16   11.94    3.17
  -1 -10 -17   18.45    1.97
   1  10  17   15.20    3.21
  -1 -10 -18    0.42    1.05
   1  10  18   -2.82    2.76
   1  10  19    5.77    2.35
  -1 -10 -19    1.13    1.40
  -1 -10 -19    0.71    0.96
   1  10  19    2.68    1.99
   1  10  20    1.92    1.80
  -1 -10 -20    0.69    1.28
  -1 -10 -20    0.89    0.86
   1  10  20    2.34    1.54
  -1 -10 -21    1.64    1.10
   1  10  21    0.05    1.23
   1  10  21    2.19    1.42
  -1 -10 -22    6.35    0.92
   1  10  22    5.59    1.04
   1  11 -13    0.70    0.69
   1  11 -13    0.41    0.58
  -1 -11  13    1.03    0.71
  -1 -11  13    0.06    0.72
   1  11 -12   30.49    1.90
  -1 -11  12   32.65    1.99
   1  11 -12   31.10    1.98
   1  11 -11    2.05    1.26
   1  11 -11    0.99    1.11
  -1 -11  11    2.58    1.33
  -1 -11  11    1.48    1.18
   1  11 -10    2.84    1.56
   1  11 -10    2.42    1.25
  -1 -11  10    1.61    1.55
  -1 -11  10    3.61    1.40
   1  11  -9    3.01    1.72
   1  11  -9    3.41    1.49
  -1 -11   9    1.90    1.57
  -1 -11   9   -0.22    1.53
  -1 -11   8    0.63    1.60
   1  11  -8    1.01    1.96
  -1 -11   8   -0.80    1.66
   1  11  -8    0.26    1.51
  -1 -11   7   10.71    1.90
  -1 -11   7   11.44    1.25
   1  11  -7   11.79    2.90
   1  11  -7   10.01    2.28
  -1 -11   7    9.51    1.87
   1  11  -7   12.03    1.86
  -1 -11   6   44.71    3.15
   1  11  -6   48.28    4.47
  -1 -11   6   48.84    2.60
   1  11  -6   42.82    3.53
  -1 -11   6   45.35    3.13
   1  11  -6   49.03    3.23
   1  11  -5   11.89    2.45
  -1 -11   5   14.36    1.94
  -1 -11   5   14.69    1.33
   1  11  -5   17.40    3.09
  -1 -11   5   19.73    3.60
   1  11  -5   15.11    2.13
  -1 -11   5   13.80    1.93
   1  11  -4    1.18    2.06
  -1 -11   4    1.38    1.51
  -1 -11   4    2.20    1.51
   1  11  -4    4.48    1.74
  -1 -11   4    2.54    2.98
  -1 -11   4    1.80    0.96
   1  11  -4    4.13    2.66
  -1 -11   3   46.26    2.51
  -1 -11   3   46.89    2.39
   1  11  -3   45.30    3.43
   1  11  -3   39.82    2.96
  -1 -11   3   39.44    2.67
  -1 -11   3   44.21    2.90
   1  11  -3   45.67    4.28
  -1 -11   3   46.53    4.44
   1  11  -3   39.10    3.05
  -1 -11   3   35.97    3.71
  -1 -11   2    3.62    0.90
   1  11  -2    6.07    2.62
   1  11  -2    5.31    1.84
  -1 -11   2    2.42    1.30
  -1 -11   2    3.02    1.45
   1  11  -2    2.04    1.57
   1  11  -2    1.90    1.99
  -1 -11   2    7.36    2.76
  -1 -11   2    2.54    2.13
  -1 -11   1   68.52    3.77
  -1 -11   1   69.23    3.89
   1  11  -1   74.60    4.04
   1  11  -1   71.51    4.30
  -1 -11   1   69.98    5.30
  -1 -11   1   62.65    4.92
  -1 -11   0   10.60    1.45
  -1 -11   0   12.31    1.56
   1  11   0   10.59    1.67
   1  11   0   12.81    2.05
  -1 -11   0   12.57    2.74
  -1 -11   0   15.42    2.89
  -1 -11   0   10.19    2.55
  -1 -11  -1  227.63   10.25
  -1 -11  -1  216.71   10.30
  -1 -11  -1  207.40   10.16
   1  11   1  227.99   10.43
   1  11   1  231.19   10.58
  -1 -11  -1  223.94   11.63
  -1 -11  -1  212.85   11.62
  -1 -11  -1  213.05   11.46
  -1 -11  -2   10.15    1.45
  -1 -11  -2    6.81    1.36
   1  11   2    7.95    1.65
  -1 -11  -2    8.55    2.52
  -1 -11  -2    4.82    2.27
  -1 -11  -2    3.49    2.25
  -1 -11  -2    7.95    1.24
   1  11   2    6.96    1.37
  -1 -11  -3    3.36    1.12
  -1 -11  -3    2.61    1.27
  -1 -11  -3    1.25    2.08
  -1 -11  -3    2.66    2.14
  -1 -11  -3    1.41    2.22
   1  11   3    3.32    1.44
  -1 -11  -4  212.35    9.61
   1  11   4  203.34    9.76
  -1 -11  -4  204.58   10.90
  -1 -11  -4  200.87   10.89
  -1 -11  -4  196.48   10.79
   1  11   5    0.89    1.24
  -1 -11  -5    3.27    2.32
  -1 -11  -5    1.96    0.98
  -1 -11  -5    2.26    1.97
   1  11   6   41.64    2.70
  -1 -11  -6   42.92    3.79
  -1 -11  -6   39.56    2.37
  -1 -11  -6   45.24    2.53
  -1 -11  -7    0.72    1.22
  -1 -11  -7    1.18    2.17
   1  11   7    2.45    2.62
  -1 -11  -7    1.73    1.01
  -1 -11  -7    0.51    1.86
   1  11   7    1.84    1.33
  -1 -11  -7    0.35    1.08
  -1 -11  -8   41.36    3.85
   1  11   8   35.12    4.06
  -1 -11  -8   43.27    2.66
  -1 -11  -8   50.22    2.53
  -1 -11  -8   51.76    4.01
  -1 -11  -8   38.04    2.64
   1  11   9    5.71    3.01
  -1 -11  -9    5.29    2.32
  -1 -11  -9    4.70    1.31
  -1 -11  -9    0.36    1.03
  -1 -11  -9   -0.13    2.08
  -1 -11  -9    3.06    1.31
  -1 -11 -10    9.93    2.41
   1  11  10   14.20    3.54
  -1 -11 -10    8.56    1.26
  -1 -11 -10    8.80    2.51
  -1 -11 -10   10.72    1.41
  -1 -11 -10    9.74    1.51
   1  11  11    1.19    1.66
  -1 -11 -11   -0.20    1.16
  -1 -11 -11    2.30    1.46
   1  11  11    2.13    3.36
  -1 -11 -11    0.61    1.99
  -1 -11 -11    2.17    1.09
  -1 -11 -11    3.49    2.24
   1  11  11    3.46    2.74
   1  11  12   89.24    5.05
  -1 -11 -12   91.01    4.76
   1  11  12   98.56    7.44
  -1 -11 -12   83.23    5.77
  -1 -11 -12   99.03    4.67
  -1 -11 -12  106.88    6.01
  -1 -11 -12   97.22    6.53
  -1 -11 -12   92.59    4.72
  -1 -11 -12  100.14    5.03
   1  11  12   99.95    6.54
  -1 -11 -13    9.64    1.91
  -1 -11 -13   14.35    1.50
   1  11  13   18.41    4.48
  -1 -11 -13   15.53    1.34
  -1 -11 -14    3.54    1.23
   1  11  14    3.89    4.05
  -1 -11 -14    3.97    1.67
  -1 -11 -15    7.22    1.33
   1  11  15    6.44    4.29
   1  11  15   12.04    3.18
  -1 -11 -15   10.12    1.89
  -1 -11 -16    1.23    1.10
   1  11  16   -1.71    3.95
  -1 -11 -16    4.91    1.65
   1  11  16    3.31    3.01
  -1 -11 -17   54.64    2.91
  -1 -11 -17   48.08    3.15
  -1 -11 -18    1.74    1.03
   1  11  18    1.28    2.53
  -1 -11 -18    3.82    1.42
  -1 -11 -19    0.79    0.92
  -1 -11 -19    2.04    1.34
   1  11  19    5.41    2.28
   1  11  19    3.74    2.12
   1  11  20   47.71    3.19
   1  11  20   41.52    3.05
  -1 -11 -20   45.98    2.82
   1  11  21    2.21    1.03
   1  11  21    2.45    1.27
   1  11  22    3.80    0.91
   1  12 -12    2.32    0.65
   1  12 -12    2.36    0.57
   1  12 -11    1.01    0.81
   1  12 -11    0.80    0.96
  -1 -12  11    0.51    0.95
  -1 -12  11    0.06    1.05
   1  12 -10    1.97    1.05
   1  12 -10    3.84    1.30
  -1 -12  10    1.67    1.19
  -1 -12  10    3.24    1.32
   1  12  -9   13.90    1.57
   1  12  -9   10.16    1.73
  -1 -12   9   12.16    1.58
  -1 -12   9   13.44    1.71
   1  12  -8   13.57    1.72
   1  12  -8   15.83    2.05
  -1 -12   8   13.83    1.81
  -1 -12   8   11.69    1.75
   1  12  -7   17.51    1.99
   1  12  -7   17.24    2.21
  -1 -12   7   15.63    1.94
  -1 -12   7   15.25    1.95
  -1 -12   6   26.60    1.90
   1  12  -6   29.48    2.44
  -1 -12   6   30.60    2.50
   1  12  -6   30.88    2.85
  -1 -12   5   46.24    3.10
   1  12  -5   54.02    4.61
   1  12  -5   46.72    3.25
  -1 -12   5   43.17    2.68
   1  12  -5   42.59    3.41
  -1 -12   4   37.81    2.83
   1  12  -4   41.19    2.99
  -1 -12   4   42.00    2.53
   1  12  -4   40.79    4.25
  -1 -12   4   38.78    2.21
  -1 -12   4   46.72    4.64
   1  12  -4   42.58    3.41
   1  12  -3   75.47    4.70
  -1 -12   3   71.07    3.91
  -1 -12   3   76.02    3.92
   1  12  -3   75.63    4.41
  -1 -12   3   88.61    6.14
  -1 -12   3   82.96    4.28
  -1 -12   3   68.49    3.59
   1  12  -3   79.35    5.70
  -1 -12   3   72.69    3.98
  -1 -12   2   23.13    3.05
  -1 -12   2   18.95    1.57
   1  12  -2   13.88    3.36
   1  12  -2   13.45    2.09
  -1 -12   2   13.75    1.80
  -1 -12   2   15.51    1.95
  -1 -12   2   16.91    1.69
   1  12  -2   13.38    1.99
   1  12  -2   14.44    2.42
  -1 -12   2   20.84    3.51
  -1 -12   2   15.22    2.86
   1  12  -1    6.22    2.98
   1  12  -1    4.76    1.91
  -1 -12   1    3.38    1.54
  -1 -12   1    2.17    1.51
   1  12  -1    3.96    1.66
  -1 -12   1    2.30    1.27
   1  12  -1    2.67    2.09
  -1 -12   1    3.31    2.89
  -1 -12   1    5.43    2.62
  -1 -12   0   11.87    1.76
  -1 -12   0    9.97    1.69
   1  12   0   12.61    1.89
  -1 -12   0   13.50    1.55
   1  12   0   13.90    2.31
  -1 -12   0   11.84    2.96
  -1 -12   0   12.00    2.84
  -1 -12  -1   24.26    2.09
  -1 -12  -1   23.54    2.10
   1  12   1   27.45    2.28
  -1 -12  -1   24.44    1.93
   1  12   1   27.11    2.55
  -1 -12  -1   20.71    3.35
  -1 -12  -1   24.43    3.53
  -1 -12  -1   23.36    3.28
  -1 -12  -2   17.37    1.95
  -1 -12  -2   18.99    1.90
  -1 -12  -2   28.90    3.55
  -1 -12  -2   28.09    3.31
  -1 -12  -2   16.28    3.07
   1  12   2   17.49    2.18
   1  12   2   22.51    2.03
  -1 -12  -2   18.32    1.74
   1  12   3    0.67    1.27
  -1 -12  -3    0.98    1.23
  -1 -12  -3   -0.27    1.36
  -1 -12  -3    0.57    2.38
  -1 -12  -3    0.14    2.44
   1  12   3    0.49    1.53
  -1 -12  -3   -1.51    2.46
  -1 -12  -4    1.27    1.16
   1  12   4    0.88    1.20
  -1 -12  -4    1.70    1.40
   1  12   4    1.55    1.55
  -1 -12  -4    1.64    2.30
  -1 -12  -4   -1.13    2.50
  -1 -12  -4    0.28    2.22
  -1 -12  -5   19.13    2.01
  -1 -12  -5   39.24    3.70
  -1 -12  -5   37.20    3.58
   1  12   5   25.04    2.22
  -1 -12  -5   16.73    3.19
  -1 -12  -6    1.93    1.08
  -1 -12  -6    3.13    2.16
   1  12   6    0.57    1.42
  -1 -12  -7   93.99    6.76
  -1 -12  -7  102.88    5.53
   1  12   7  107.44    6.07
  -1 -12  -7  126.70    7.18
  -1 -12  -7  120.77    5.34
  -1 -12  -7  103.64    5.45
  -1 -12  -8   20.82    2.03
  -1 -12  -8   15.99    3.06
  -1 -12  -8   25.50    3.29
  -1 -12  -8   27.03    1.76
  -1 -12  -8   20.46    1.97
  -1 -12  -9   45.26    2.90
   1  12   9   43.43    4.55
  -1 -12  -9   41.76    4.19
  -1 -12  -9   53.39    4.49
  -1 -12  -9   48.05    2.70
  -1 -12  -9   48.39    2.96
  -1 -12 -10   26.95    2.02
  -1 -12 -10   16.84    3.01
  -1 -12 -10   16.05    1.58
  -1 -12 -10   17.92    1.88
   1  12  10   21.09    3.84
  -1 -12 -10   20.66    3.06
  -1 -12 -11   10.54    2.61
   1  12  11   10.99    3.77
  -1 -12 -11   10.68    1.75
   1  12  11   12.60    2.32
  -1 -12 -11   11.33    1.70
   1  12  11   13.01    3.46
  -1 -12 -11    9.55    1.35
  -1 -12 -11    8.57    2.74
   1  12  12  134.46    9.23
  -1 -12 -12  112.30    7.87
  -1 -12 -12  153.69    7.07
   1  12  12  122.81    7.07
  -1 -12 -12  122.56    6.80
   1  12  12  133.49    8.56
  -1 -12 -12  153.59    6.77
  -1 -12 -12  156.49    8.26
  -1 -12 -12  156.04    6.82
  -1 -12 -12  169.56    8.98
  -1 -12 -13    3.44    1.75
   1  12  13    1.51    3.67
  -1 -12 -13    4.65    1.13
  -1 -12 -13    5.08    2.79
  -1 -12 -13    3.99    1.24
   1  12  13    4.91    1.76
  -1 -12 -13    5.36    1.27
  -1 -12 -14   47.66    3.23
  -1 -12 -14   63.27    5.04
  -1 -12 -14   56.44    2.92
   1  12  14   39.47    5.51
  -1 -12 -14   44.35    2.83
  -1 -12 -15   13.52    1.96
   1  12  15   12.03    3.10
  -1 -12 -15   18.79    1.56
   1  12  15   10.49    4.26
  -1 -12 -15   10.01    1.48
  -1 -12 -16    4.18    1.18
  -1 -12 -16    4.22    1.33
   1  12  16    5.48    3.08
  -1 -12 -16    7.77    1.75
  -1 -12 -17    6.19    1.19
  -1 -12 -17    7.16    1.40
   1  12  17    9.47    3.01
  -1 -12 -17    9.36    1.72
  -1 -12 -18   11.12    1.26
   1  12  18    8.78    2.77
  -1 -12 -19   27.98    1.75
   1  12  19   26.68    2.74
   1  12  19   23.43    2.71
   1  12  20   -0.15    1.63
   1  12  20    3.68    1.75
   1  12  21   10.69    1.24
   1  12  21   14.90    1.56
   1  12  21   13.49    1.43
   1  12  22    0.61    0.71
   1  13 -11   13.68    0.92
   1  13 -11   10.91    0.79
  -1 -13  11   13.31    1.03
   1  13 -10   64.59    3.07
   1  13 -10   58.74    3.14
  -1 -13  10   65.23    3.15
  -1 -13  10   55.20    3.16
   1  13  -9   58.11    3.07
   1  13  -9   58.46    3.19
  -1 -13   9   61.79    3.13
  -1 -13   9   52.73    3.16
   1  13  -8    3.94    1.17
   1  13  -8    5.98    1.48
  -1 -13   8    4.38    1.35
  -1 -13   8    4.87    1.40
   1  13  -7   -0.47    1.26
   1  13  -7    1.29    1.58
  -1 -13   7   -0.08    1.35
  -1 -13   7   -0.42    1.43
   1  13  -6    1.18    1.40
   1  13  -6    3.49    1.79
  -1 -13   6    2.80    1.61
  -1 -13   6    1.73    1.47
   1  13  -5   24.38    2.23
   1  13  -5   27.15    2.69
  -1 -13   5   24.04    2.28
  -1 -13   5   22.62    2.17
   1  13  -4  310.91   14.47
  -1 -13   4  298.78   14.06
  -1 -13   4  297.92   14.25
  -1 -13   4  325.95   14.42
   1  13  -4  321.22   14.70
   1  13  -3  291.37   14.16
  -1 -13   3  289.58   13.56
  -1 -13   3  283.26   13.68
   1  13  -3  291.93   13.94
  -1 -13   3  293.11   13.56
   1  13  -3  338.55   15.68
  -1 -13   3  322.43   15.74
  -1 -13   3  311.43   13.86
   1  13  -2    4.28    2.28
  -1 -13   2    4.83    1.42
   1  13  -2    4.19    1.73
  -1 -13   2    6.56    1.35
  -1 -13   2    3.67    1.36
  -1 -13   2    5.96    1.27
  -1 -13   2    6.09    1.74
  -1 -13   2    6.45    3.05
   1  13  -2    5.20    1.97
  -1 -13   2    4.06    1.59
  -1 -13   1    0.93    2.52
   1  13  -1    0.07    2.15
  -1 -13   1    1.53    1.21
   1  13  -1    2.28    1.64
  -1 -13   1    2.86    1.35
   1  13  -1    2.10    2.99
  -1 -13   1    2.28    1.26
  -1 -13   1    2.00    2.41
   1  13  -1    1.59    2.44
  -1 -13   1    0.97    1.63
  -1 -13   1    0.68    2.73
   1  13  -1   -0.15    1.86
  -1 -13   1    0.48    1.59
  -1 -13   0    1.41    2.51
   1  13   0    1.69    2.18
  -1 -13   0    2.32    1.17
  -1 -13   0    1.53    1.28
   1  13   0    2.57    1.56
  -1 -13   0    4.34    2.87
  -1 -13   0    2.33    1.59
   1  13   0    5.57    3.07
  -1 -13   0    2.31    1.28
  -1 -13   0   -0.14    2.38
   1  13   0    3.79    2.14
  -1 -13   0   -0.92    1.62
  -1 -13  -1    1.79    1.61
  -1 -13  -1    3.84    1.61
   1  13   1    5.02    2.14
  -1 -13  -1    1.73    2.63
  -1 -13  -1    4.78    2.94
   1  13   1    3.07    1.63
  -1 -13  -1    1.61    1.26
   1  13   2    0.37    1.46
  -1 -13  -2    1.50    1.24
  -1 -13  -2    1.17    1.71
   1  13   2    0.84    1.89
  -1 -13  -2   -0.49    2.81
  -1 -13  -2    4.46    3.00
  -1 -13  -2    1.56    2.74
   1  13   3   99.73    5.40
  -1 -13  -3  104.89    5.25
  -1 -13  -3  100.48    5.38
   1  13   3  104.12    5.67
  -1 -13  -3  126.55    7.29
  -1 -13  -3  126.97    7.23
  -1 -13  -3   80.50    6.60
  -1 -13  -4   33.03    2.42
  -1 -13  -4   40.36    2.67
   1  13   4   35.59    2.89
  -1 -13  -4   27.79    3.72
  -1 -13  -4   30.35    3.90
  -1 -13  -4   30.89    3.87
  -1 -13  -5   56.37    3.13
   1  13   5   50.05    3.40
  -1 -13  -5   58.32    4.82
  -1 -13  -5   52.11    4.79
  -1 -13  -5   48.11    3.29
  -1 -13  -6   49.02    4.47
  -1 -13  -6   52.09    4.63
   1  13   6   49.98    3.85
   1  13   6   46.69    3.25
  -1 -13  -7   60.57    4.66
  -1 -13  -7   25.17    3.94
  -1 -13  -8  212.71   12.62
  -1 -13  -8  247.05   11.27
  -1 -13  -8  266.96   13.12
  -1 -13  -8  243.47   11.04
  -1 -13  -8  229.73   11.23
  -1 -13  -9    0.31    2.49
  -1 -13  -9    0.92    1.12
  -1 -13  -9    0.96    2.49
  -1 -13  -9    0.56    1.63
  -1 -13  -9    0.39    1.42
   1  13  10    3.05    2.33
  -1 -13 -10    1.07    1.63
  -1 -13 -10    2.62    1.63
  -1 -13 -10    2.45    2.51
  -1 -13 -10    0.32    2.43
  -1 -13 -10    2.23    1.16
   1  13  10    4.46    3.39
  -1 -13 -11   65.67    3.57
   1  13  11   64.17    4.10
   1  13  11   60.71    5.69
  -1 -13 -11   56.26    4.64
  -1 -13 -11   60.17    3.24
  -1 -13 -11   59.40    5.14
  -1 -13 -11   48.58    3.13
  -1 -13 -11   65.98    3.65
  -1 -13 -11   58.30    4.88
  -1 -13 -12    2.34    2.26
   1  13  12    2.98    3.40
  -1 -13 -12    5.65    1.28
   1  13  12    5.21    3.28
  -1 -13 -12    6.26    2.48
  -1 -13 -12    8.95    2.93
  -1 -13 -12    4.75    1.22
  -1 -13 -12    8.81    1.82
  -1 -13 -12    4.30    1.34
  -1 -13 -12    3.29    1.53
   1  13  12    2.72    2.15
   1  13  13   30.02    4.67
  -1 -13 -13   36.23    2.16
  -1 -13 -13   26.49    2.54
  -1 -13 -13   33.57    2.29
   1  13  13   33.04    2.80
  -1 -13 -13   33.90    4.05
  -1 -13 -13   30.23    2.15
  -1 -13 -14    4.17    2.74
  -1 -13 -14    6.92    1.25
   1  13  14    4.72    3.79
  -1 -13 -14    2.77    1.76
   1  13  15    3.38    3.01
  -1 -13 -15    4.56    1.16
  -1 -13 -15    4.33    1.79
   1  13  16    2.71    2.79
  -1 -13 -16    2.94    1.11
  -1 -13 -16    6.52    1.71
   1  13  17  114.90    6.72
  -1 -13 -17  128.57    5.93
  -1 -13 -17  121.33    6.16
   1  13  18   67.53    4.81
  -1 -13 -18   85.07    4.01
   1  13  19   13.39    2.33
  -1 -13 -19   13.49    1.14
   1  13  19   13.00    2.28
   1  13  20   51.85    3.28
   1  13  20   58.34    3.36
   1  13  21    1.40    1.11
   1  13  21   -0.11    0.94
   1  13  21    0.91    1.04
  -1 -14  10    2.57    0.56
   1  14  -9   16.55    1.25
  -1 -14   9   15.64    1.26
   1  14  -9   16.77    1.08
  -1 -14   8    5.01    1.11
   1  14  -8    5.61    1.13
  -1 -14   8    4.75    1.11
   1  14  -8    5.63    0.94
  -1 -14   7   -0.67    1.15
   1  14  -7    0.53    1.29
  -1 -14   7   -0.20    1.11
   1  14  -7    0.85    1.00
  -1 -14   6    9.10    1.41
   1  14  -6    8.88    1.75
  -1 -14   6   10.41    1.46
   1  14  -6    6.95    1.36
  -1 -14   5    4.33    1.43
   1  14  -5    4.70    1.83
  -1 -14   5    2.52    1.42
   1  14  -5    4.14    1.43
  -1 -14   4    0.88    1.28
   1  14  -4    1.03    1.99
  -1 -14   4    1.99    1.54
   1  14  -4    0.55    1.41
  -1 -14   3  163.30    8.24
  -1 -14   3  168.32    8.08
   1  14  -3  173.75    8.45
   1  14  -3  175.81    8.72
  -1 -14   3  184.07    8.44
  -1 -14   2    3.26    1.36
   1  14  -2    2.18    1.62
  -1 -14   2    2.65    1.23
  -1 -14   2    3.74    1.40
  -1 -14   2    3.29    1.72
  -1 -14   2    6.25    1.53
   1  14  -2    2.94    1.72
   1  14  -2    3.13    2.16
   1  14  -1   25.84    2.84
  -1 -14   1   23.75    2.01
  -1 -14   1   23.73    2.12
  -1 -14   1   25.00    1.97
   1  14  -1   26.83    2.35
  -1 -14   1   24.38    3.77
  -1 -14   1   28.11    2.41
   1  14  -1   28.45    3.67
  -1 -14   1   24.21    1.92
  -1 -14   1   26.73    2.30
   1  14  -1   25.07    2.52
  -1 -14   0   16.57    1.66
  -1 -14   0   19.13    3.11
   1  14   0   17.50    3.20
   1  14   0   14.54    3.54
   1  14   0   16.29    2.60
   1  14   0   15.96    2.45
  -1 -14   0   17.25    2.10
  -1 -14   0   19.82    2.13
  -1 -14   0   14.69    3.39
  -1 -14   0   15.12    1.88
   1  14   0   18.96    2.15
  -1 -14   0   19.51    1.81
  -1 -14   0   16.04    3.19
   1  14   1   62.25    4.25
   1  14   1   54.78    4.04
  -1 -14  -1   52.77    3.73
   1  14   1   66.32    5.81
   1  14   1   67.46    5.25
  -1 -14  -1   73.92    3.58
  -1 -14  -1   79.07    5.28
  -1 -14  -1   86.11    5.93
  -1 -14  -1   51.40    4.97
  -1 -14  -1   65.18    3.60
   1  14   1   63.39    3.86
   1  14   2   29.10    2.96
   1  14   2   30.62    2.48
  -1 -14  -2   30.05    2.18
   1  14   2   23.14    2.95
  -1 -14  -2   23.53    2.49
  -1 -14  -2   27.93    3.58
  -1 -14  -2   29.62    2.17
   1  14   2   33.01    3.82
   1  14   2   30.31    4.24
  -1 -14  -2   36.19    4.21
  -1 -14  -2   20.93    3.61
   1  14   3    5.89    2.15
  -1 -14  -3    4.06    1.37
   1  14   3    3.32    1.53
  -1 -14  -3    5.60    1.88
   1  14   3    7.35    2.61
  -1 -14  -3    4.61    3.03
  -1 -14  -3    7.73    3.17
  -1 -14  -3    2.05    2.83
   1  14   4    0.64    1.92
  -1 -14  -4    1.27    1.44
  -1 -14  -4    1.33    1.85
   1  14   4    3.29    2.41
  -1 -14  -4    2.71    2.76
  -1 -14  -4   -0.84    2.83
  -1 -14  -4    2.05    2.81
   1  14   5    1.36    1.84
  -1 -14  -5    0.77    1.41
   1  14   5    1.21    2.14
  -1 -14  -5    2.22    2.83
  -1 -14  -5    2.00    1.85
  -1 -14  -5    1.51    2.78
  -1 -14  -5   -0.33    2.89
  -1 -14  -6   29.97    2.71
  -1 -14  -6   34.71    4.03
  -1 -14  -6   33.29    4.06
   1  14   6   32.39    2.79
  -1 -14  -7  117.61    7.79
  -1 -14  -8   31.27    2.53
  -1 -14  -8   37.80    2.77
  -1 -14  -8   27.69    4.09
  -1 -14  -8   34.29    4.12
  -1 -14  -9  114.02    8.82
  -1 -14  -9  140.02    7.52
   1  14   9  123.91    7.96
  -1 -14  -9  144.14    7.56
   1  14   9  147.72    9.84
  -1 -14  -9  162.39    7.40
  -1 -14  -9  176.57    9.25
  -1 -14  -9  195.15    9.71
  -1 -14  -9  174.88    7.33
  -1 -14 -10   28.23    3.83
  -1 -14 -10   37.67    2.85
  -1 -14 -10   34.68    2.79
   1  14  10   29.54    3.46
   1  14  10   40.09    5.08
  -1 -14 -10   43.73    4.09
  -1 -14 -10   43.64    2.56
  -1 -14 -10   47.91    4.45
  -1 -14 -10   44.41    2.48
  -1 -14 -11   74.24    3.79
  -1 -14 -11   70.95    5.36
  -1 -14 -11   71.69    3.92
  -1 -14 -11   69.33    4.03
   1  14  11   70.52    4.54
  -1 -14 -11   75.68    4.07
   1  14  11   63.96    6.06
  -1 -14 -11   69.57    5.52
  -1 -14 -11   64.11    3.65
  -1 -14 -11   63.41    5.48
  -1 -14 -12    6.07    1.75
  -1 -14 -12    3.64    1.48
   1  14  12    6.83    3.68
  -1 -14 -12    4.70    1.34
  -1 -14 -12    3.88    2.52
  -1 -14 -12    4.47    2.44
  -1 -14 -12    4.32    1.61
   1  14  12    5.99    2.39
  -1 -14 -12    4.24    1.18
  -1 -14 -12    5.22    2.81
  -1 -14 -13   45.10    2.89
  -1 -14 -13   49.26    3.21
  -1 -14 -13   37.91    2.88
   1  14  13   37.76    3.36
  -1 -14 -13   66.40    5.01
  -1 -14 -13   60.38    2.88
  -1 -14 -13   54.29    2.83
  -1 -14 -14   30.14    2.65
  -1 -14 -14   37.53    2.22
  -1 -14 -15    7.12    1.78
  -1 -14 -15    8.78    1.23
   1  14  16    2.12    2.84
  -1 -14 -16    3.21    1.57
  -1 -14 -16    2.54    0.98
   1  14  17   10.70    2.84
  -1 -14 -17   12.01    1.69
  -1 -14 -17   11.08    1.15
   1  14  18  115.47    6.27
  -1 -14 -18  120.23    5.56
  -1 -14 -18  117.08    5.76
   1  14  19   17.51    2.31
  -1 -14 -19   19.78    1.82
   1  14  19   22.84    2.46
   1  14  20   14.14    1.72
  -1 -14 -20   14.53    1.41
   1  14  20   15.15    1.85
  -1 -14 -21    0.61    0.67
   1  14  21    1.62    0.91
   1  15  -8    6.34    0.76
  -1 -15   8    4.78    0.71
   1  15  -7    2.06    0.91
   1  15  -7    1.87    0.70
  -1 -15   7    2.45    0.87
   1  15  -6    2.49    0.91
   1  15  -6    1.93    1.19
  -1 -15   6    2.57    1.04
  -1 -15   6    2.05    1.01
   1  15  -5   16.28    1.42
  -1 -15   5   13.07    1.45
   1  15  -5   14.28    1.73
   1  15  -4    5.91    1.30
  -1 -15   4    5.71    1.27
   1  15  -4    7.58    1.78
   1  15  -3   13.22    1.64
  -1 -15   3   13.71    1.51
   1  15  -3   14.93    2.15
   1  15  -2   64.69    3.87
  -1 -15   2   70.02    3.57
   1  15  -2   73.13    4.26
  -1 -15   2   65.47    3.66
  -1 -15   1   -0.88    1.11
  -1 -15   1    0.48    1.11
   1  15  -1    0.16    1.47
  -1 -15   1    0.58    1.17
  -1 -15   1    0.73    1.36
   1  15  -1   -1.58    2.11
   1  15  -1   -0.19    1.75
  -1 -15   1    1.15    1.44
  -1 -15   0   42.88    2.88
   1  15   0   47.25    3.03
  -1 -15   0   45.15    2.72
   1  15   0   40.74    3.22
  -1 -15   0   42.30    2.96
   1  15   0   46.24    3.49
  -1 -15   0   47.94    2.72
  -1 -15  -1   -0.09    1.56
  -1 -15  -1    0.16    1.31
   1  15   1    2.00    1.51
  -1 -15  -1    1.44    1.27
  -1 -15  -1    1.04    1.74
   1  15   1    1.53    2.10
   1  15   1    1.11    2.17
  -1 -15  -2   82.42    6.62
   1  15   2  104.85    5.66
  -1 -15  -2   96.30    5.17
  -1 -15  -2  101.76    5.03
  -1 -15  -2   99.14    5.00
   1  15   2   90.15    6.54
  -1 -15  -2  101.77    6.68
   1  15   2   97.94    7.26
  -1 -15  -2  108.24    7.09
  -1 -15  -2   91.76    5.25
   1  15   2   99.02    5.58
   1  15   3    5.36    2.25
  -1 -15  -3    4.51    1.43
  -1 -15  -3    4.41    1.91
   1  15   3    3.80    2.49
  -1 -15  -3    7.59    2.93
  -1 -15  -3    4.85    1.43
   1  15   3    5.66    2.55
   1  15   3    6.61    3.51
  -1 -15  -3   11.81    3.31
  -1 -15  -3    6.05    2.83
   1  15   4   13.27    2.32
  -1 -15  -4   13.00    1.67
  -1 -15  -4   13.27    2.14
   1  15   4   11.99    2.81
  -1 -15  -4   10.48    2.88
  -1 -15  -4   10.90    1.61
   1  15   4   11.01    3.70
   1  15   4    7.82    2.64
  -1 -15  -4   12.46    3.23
  -1 -15  -4    8.14    3.14
  -1 -15  -4   10.66    3.16
   1  15   5   13.36    2.34
  -1 -15  -5    7.44    3.12
  -1 -15  -5   22.04    3.36
  -1 -15  -5   17.87    1.80
   1  15   5   15.43    4.15
  -1 -15  -5   21.37    3.68
  -1 -15  -5   20.66    3.66
  -1 -15  -5   15.79    1.88
  -1 -15  -5   11.63    2.23
   1  15   5   11.29    2.86
  -1 -15  -6   26.16    3.89
   1  15   6   33.33    4.82
  -1 -15  -6   32.69    3.94
  -1 -15  -6   35.71    2.40
  -1 -15  -6   33.74    2.48
  -1 -15  -6   43.45    4.38
   1  15   6   26.19    3.46
  -1 -15  -6   30.59    2.75
  -1 -15  -7    1.53    2.84
  -1 -15  -7    2.83    1.37
  -1 -15  -8    4.85    2.76
  -1 -15  -8   10.50    2.91
   1  15   8    2.62    3.58
  -1 -15  -8    9.35    3.05
  -1 -15  -8    6.06    1.97
  -1 -15  -9   17.45    3.50
  -1 -15  -9   24.74    2.25
  -1 -15  -9   29.84    3.70
   1  15   9   27.70    4.57
  -1 -15  -9   27.44    2.10
  -1 -15  -9   36.49    4.05
  -1 -15  -9   19.17    2.39
   1  15   9   19.53    3.14
  -1 -15 -10   66.61    4.28
   1  15  10   68.88    4.93
   1  15  10   68.25    6.70
  -1 -15 -10   74.22    4.25
  -1 -15 -10   76.42    4.29
  -1 -15 -10   56.68    5.54
  -1 -15 -10   91.81    5.99
  -1 -15 -10   84.31    4.13
  -1 -15 -10   88.69    6.22
  -1 -15 -10  101.73    6.46
  -1 -15 -11  101.81    5.32
  -1 -15 -11   98.68    5.23
  -1 -15 -11  118.29    7.20
  -1 -15 -11  112.86    5.15
  -1 -15 -11   90.48    5.27
   1  15  11   87.47    5.75
  -1 -15 -12   75.56    4.23
  -1 -15 -12   72.32    4.03
  -1 -15 -12   75.87    3.79
  -1 -15 -12   77.20    3.90
   1  15  12   64.82    4.60
  -1 -15 -12   69.16    4.07
  -1 -15 -13   24.60    2.42
  -1 -15 -13   24.87    2.05
  -1 -15 -13   29.97    1.88
  -1 -15 -13   29.55    1.98
   1  15  13   22.09    2.71
  -1 -15 -14   -0.51    1.70
  -1 -15 -14    3.18    1.03
  -1 -15 -15   25.91    2.32
  -1 -15 -15   28.72    1.77
  -1 -15 -16    8.21    1.06
  -1 -15 -16    6.18    1.74
  -1 -15 -16    9.41    1.63
   1  15  16    7.77    2.86
  -1 -15 -17    0.37    1.45
  -1 -15 -17    2.04    1.30
   1  15  17   -1.41    2.50
  -1 -15 -18    1.23    1.31
   1  15  18    0.29    2.14
  -1 -15 -18    3.11    1.16
   1  15  18    4.50    2.16
  -1 -15 -19   -0.02    1.05
   1  15  19   -0.59    1.77
  -1 -15 -19    2.02    1.13
   1  15  19    1.11    1.83
   1  15  20    8.10    1.30
   1  15  20    5.60    1.41
  -1 -15 -20    8.03    0.95
  -1 -16   6    0.70    0.54
  -1 -16   6   -0.28    0.68
   1  16  -6    0.39    0.74
  -1 -16   5    0.96    0.72
  -1 -16   5    0.43    0.92
   1  16  -5    1.78    0.98
   1  16  -4    7.11    1.32
   1  16  -4    5.56    0.95
  -1 -16   4    5.31    0.96
   1  16  -3   -0.25    1.45
   1  16  -3    0.40    0.93
  -1 -16   3    0.55    0.87
   1  16  -2   55.85    3.33
   1  16  -2   53.69    2.96
  -1 -16   2   47.77    2.76
   1  16  -1   48.10    3.20
   1  16  -1   45.56    2.81
  -1 -16   0    7.39    1.28
   1  16   0    9.50    2.10
   1  16   0   11.88    1.91
  -1 -16   0   10.23    1.64
  -1 -16   0    9.71    1.30
  -1 -16   0   11.27    1.55
  -1 -16  -1   18.95    1.67
   1  16   1   15.62    2.35
  -1 -16  -1   18.13    1.67
  -1 -16  -1   17.73    1.87
   1  16   1   14.20    2.31
  -1 -16  -1   16.58    1.98
  -1 -16  -2   15.34    1.67
   1  16   2   14.09    2.39
  -1 -16  -2   18.28    1.72
  -1 -16  -2   16.03    1.95
  -1 -16  -2   15.24    2.08
   1  16   2   17.02    2.49
  -1 -16  -3   65.24    3.55
   1  16   3   61.21    4.11
  -1 -16  -3   76.86    3.59
  -1 -16  -3   63.89    3.75
  -1 -16  -3   53.16    3.76
   1  16   3   51.46    4.11
  -1 -16  -4    0.48    1.31
   1  16   4    3.07    2.11
  -1 -16  -4    0.32    1.36
  -1 -16  -4    0.14    1.72
   1  16   4    0.88    2.40
  -1 -16  -4   -1.88    1.86
  -1 -16  -5   21.61    2.00
   1  16   5   16.25    2.91
  -1 -16  -5   16.14    2.35
  -1 -16  -6    1.61    1.72
  -1 -16  -6    1.28    1.54
   1  16   6    0.61    2.57
  -1 -16  -6    0.61    1.88
  -1 -16  -6    1.82    1.40
  -1 -16  -7    1.00    1.52
  -1 -16  -7   -0.05    1.58
  -1 -16  -7    1.03    1.39
  -1 -16  -7    0.05    1.82
   1  16   7    1.59    2.62
  -1 -16  -8   88.74    4.82
  -1 -16  -9    2.24    1.74
   1  16   9    3.37    2.61
  -1 -16  -9    2.30    1.85
  -1 -16  -9    3.28    1.35
  -1 -16 -10   46.71    2.65
  -1 -16 -10   38.50    2.83
  -1 -16 -10   37.55    2.91
  -1 -16 -10   46.88    2.92
  -1 -16 -11   88.00    4.51
  -1 -16 -11   80.27    4.39
  -1 -16 -11   90.39    4.29
   1  16  11   66.46    5.00
  -1 -16 -11   77.80    4.46
  -1 -16 -11   78.04    4.43
  -1 -16 -12   33.42    2.19
   1  16  12   26.74    3.10
  -1 -16 -12   33.32    2.43
  -1 -16 -12   30.80    2.33
  -1 -16 -12   31.98    2.58
  -1 -16 -13   60.30    3.20
  -1 -16 -13   56.56    3.29
  -1 -16 -13   60.25    3.53
  -1 -16 -14   13.13    1.33
  -1 -16 -14   12.90    1.81
  -1 -16 -15    0.36    1.46
  -1 -16 -15    0.90    1.52
   1  16  15   -0.21    2.54
  -1 -16 -16   14.85    1.68
   1  16  16   14.94    2.74
  -1 -16 -16   14.59    1.77
  -1 -16 -17    0.57    1.17
  -1 -16 -17    0.98    1.24
   1  16  17    2.39    2.26
  -1 -16 -18   12.97    1.40
   1  16  18   13.17    2.14
   1  16  18   12.89    2.14
  -1 -16 -19   20.89    1.33
   1  16  19   17.27    1.76
  -1 -16 -19   14.63    1.28
   1  16  19   19.00    2.00
  -1 -17   5    2.17    0.54
   1  17  -4    0.37    0.71
   1  17  -4    1.11    0.87
   1  17  -3   30.87    1.98
  -1 -17   3   32.14    1.92
   1  17  -3   31.29    2.09
   1  17  -2    4.70    1.26
   1  17  -1    2.89    1.38
   1  17   0   -0.05    1.51
  -1 -17  -1    3.97    1.10
  -1 -17  -1    4.27    1.17
   1  17   1    2.98    1.23
   1  17   1    6.91    1.69
  -1 -17  -1    5.87    1.38
   1  17   1    4.02    1.60
  -1 -17  -2   10.90    1.37
   1  17   2   11.45    1.98
  -1 -17  -2   14.22    1.39
  -1 -17  -2   15.73    1.74
   1  17   2    9.55    1.99
  -1 -17  -2   13.01    1.74
  -1 -17  -3    0.26    1.22
   1  17   3    1.25    1.72
  -1 -17  -3   -0.10    1.17
  -1 -17  -3    0.68    1.53
  -1 -17  -3   -0.13    1.54
   1  17   3   -0.22    1.94
  -1 -17  -4    7.04    1.69
  -1 -17  -4    6.93    1.38
   1  17   4    6.76    2.36
  -1 -17  -4    9.05    1.73
  -1 -17  -4    7.16    1.40
  -1 -17  -5   -0.45    1.35
   1  17   5   -0.61    2.21
  -1 -17  -5    2.05    1.77
  -1 -17  -5    1.33    1.27
  -1 -17  -6   14.70    2.06
  -1 -17  -6   19.58    1.89
   1  17   6   12.01    2.70
  -1 -17  -6   12.84    2.05
  -1 -17  -7   31.85    2.18
  -1 -17  -7   28.43    2.51
   1  17   7   26.33    3.15
  -1 -17  -7   27.01    2.48
  -1 -17  -7   28.48    2.22
  -1 -17  -8   -0.26    1.57
  -1 -17  -9   55.19    3.33
  -1 -17  -9   56.12    3.30
  -1 -17 -10    0.91    1.52
   1  17  10    2.07    2.38
  -1 -17 -10    4.52    1.67
  -1 -17 -10    1.59    1.25
  -1 -17 -11    1.75    1.44
  -1 -17 -11    1.95    1.55
   1  17  11    3.28    2.29
  -1 -17 -11    2.83    1.43
  -1 -17 -11    1.67    1.55
  -1 -17 -11    6.74    1.27
  -1 -17 -12    0.39    1.12
  -1 -17 -12    0.95    1.38
   1  17  12    2.15    2.17
  -1 -17 -12   -0.15    1.56
  -1 -17 -12    2.09    1.32
  -1 -17 -13    1.81    1.16
  -1 -17 -13    1.33    1.39
  -1 -17 -14   78.44    3.79
  -1 -17 -14   60.81    3.36
  -1 -17 -14   73.28    3.71
  -1 -17 -14   63.28    3.40
   1  17  14   70.14    3.93
  -1 -17 -15   18.46    1.71
   1  17  15   18.37    2.82
  -1 -17 -15   16.54    1.74
  -1 -17 -16    5.33    1.27
   1  17  16    2.61    2.26
   1  17  16    6.72    2.08
  -1 -17 -16    4.42    1.21
  -1 -17 -17    0.88    1.03
   1  17  17    1.10    1.94
  -1 -17 -17    2.94    1.01
   1  17  17    3.92    1.86
  -1 -17 -18   -1.86    1.05
  -1 -17 -18    0.18    0.76
   1  17  18    1.87    1.55
  -1 -18   3   14.37    0.92
  -1 -18   2    3.64    0.73
  -1 -18   1    0.41    0.80
   1  18  -1    1.13    1.14
  -1 -18   0    2.34    0.94
  -1 -18  -1   10.77    1.21
  -1 -18  -2   30.23    1.90
   1  18   2   32.48    1.94
  -1 -18  -2   26.74    1.97
  -1 -18  -2   30.25    1.83
  -1 -18  -3    3.90    1.31
  -1 -18  -3    0.72    1.12
  -1 -18  -3    3.43    1.06
   1  18   3    5.95    1.25
   1  18   3    1.47    1.56
  -1 -18  -3    2.66    1.31
  -1 -18  -3    5.39    1.05
  -1 -18  -4    8.49    1.16
  -1 -18  -4    8.81    1.24
  -1 -18  -4   11.02    1.52
   1  18   4    9.63    1.98
  -1 -18  -4    9.38    1.23
  -1 -18  -4   10.35    1.55
  -1 -18  -5    5.63    1.04
  -1 -18  -5    7.37    1.50
   1  18   5    3.82    1.94
  -1 -18  -5    6.78    1.26
  -1 -18  -5    7.77    1.24
  -1 -18  -5    6.80    1.54
   1  18   6   46.64    3.80
  -1 -18  -6   47.03    3.41
  -1 -18  -7    3.32    1.19
   1  18   7    1.38    1.46
  -1 -18  -7    1.20    1.50
   1  18   7    1.52    2.11
  -1 -18  -7    2.73    1.27
  -1 -18  -7    1.50    1.51
  -1 -18  -8   44.33    2.97
  -1 -18  -8   47.52    2.87
  -1 -18  -8   53.09    2.82
  -1 -18  -9    0.19    1.45
  -1 -18  -9    1.93    1.46
  -1 -18 -10    1.79    1.35
  -1 -18 -10    2.25    1.11
   1  18  10    1.79    2.15
  -1 -18 -10    0.93    1.34
  -1 -18 -10   -0.54    1.46
  -1 -18 -11   34.67    2.31
   1  18  11   36.70    2.54
  -1 -18 -11   27.87    2.27
   1  18  11   25.26    2.82
  -1 -18 -11   44.36    2.23
  -1 -18 -12   -0.19    1.30
  -1 -18 -12    1.66    1.18
  -1 -18 -12    0.51    0.98
   1  18  12    1.99    1.42
  -1 -18 -12    0.13    1.09
  -1 -18 -12    0.80    1.18
   1  18  12    1.35    1.92
  -1 -18 -13    1.44    0.96
   1  18  13    3.08    1.94
  -1 -18 -13    2.39    1.00
  -1 -18 -13   -0.50    1.21
  -1 -18 -14    2.84    0.84
   1  18  14    4.48    1.54
  -1 -18 -14    1.32    1.14
  -1 -18 -14    4.69    1.21
  -1 -18 -15   40.29    2.56
  -1 -18 -15   51.56    2.65
   1  18  15   49.47    3.34
  -1 -18 -15   48.66    2.62
   1  18  16    1.29    1.86
  -1 -18 -16    1.09    0.91
  -1 -18 -16    1.61    0.93
  -1 -18 -17    6.84    0.80
  -1 -18 -17    4.99    1.00
   1  18  17    5.71    1.56
  -1 -18 -17    7.19    0.85
  -1 -19   0    2.81    0.58
   1  19   0    2.07    0.81
  -1 -19  -1    1.16    0.64
   1  19   1    0.48    0.97
  -1 -19  -2   16.64    1.16
   1  19   2   15.42    1.54
  -1 -19  -3    0.99    0.76
   1  19   3    1.36    1.23
  -1 -19  -4    7.30    1.09
  -1 -19  -4    8.09    0.87
   1  19   4    9.28    1.65
  -1 -19  -4    9.62    1.22
   1  19   4    8.10    1.42
   1  19   5    1.14    1.24
  -1 -19  -5    3.70    1.18
  -1 -19  -5    2.01    1.04
   1  19   5    2.01    1.13
   1  19   5    2.46    1.51
  -1 -19  -5    3.24    1.16
  -1 -19  -5    2.17    0.94
  -1 -19  -6   11.26    1.14
  -1 -19  -6   12.05    1.19
   1  19   6   11.53    1.40
   1  19   6    6.97    1.75
  -1 -19  -6    9.17    1.37
   1  19   6    7.71    1.39
  -1 -19  -7    1.01    0.97
  -1 -19  -7   -0.03    1.21
   1  19   7    1.87    1.29
  -1 -19  -7    1.05    1.20
   1  19   7   -0.19    1.64
  -1 -19  -7    0.74    0.96
  -1 -19  -8   25.13    1.88
  -1 -19  -8   22.37    1.67
  -1 -19  -8   23.34    1.76
   1  19   8   26.02    1.99
  -1 -19  -8   17.02    1.78
   1  19   8   15.90    2.23
  -1 -19  -8   30.92    1.69
  -1 -19  -9   33.95    2.14
  -1 -19  -9   36.24    2.14
  -1 -19  -9   39.23    2.29
  -1 -19 -10    1.72    1.15
  -1 -19 -10    2.94    0.97
   1  19  10    2.44    1.33
   1  19  10    0.53    1.75
  -1 -19 -10    1.68    1.12
  -1 -19 -10    0.44    1.08
  -1 -19 -11    1.94    0.99
  -1 -19 -11    6.06    1.16
   1  19  11    3.35    2.05
   1  19  11    3.39    1.31
  -1 -19 -11    1.89    0.93
   1  19  11    4.14    1.73
  -1 -19 -11    0.28    1.09
  -1 -19 -12    9.20    1.10
  -1 -19 -12   11.58    1.22
   1  19  12   11.13    2.00
  -1 -19 -12   11.67    1.27
  -1 -19 -13    1.75    0.71
  -1 -19 -13    1.98    0.93
   1  19  13    3.26    1.53
  -1 -19 -13    1.99    0.99
  -1 -19 -13    0.43    0.78
   1  19  14   38.08    2.79
  -1 -19 -14   37.61    2.06
  -1 -19 -14   40.99    2.14
  -1 -19 -14   33.64    2.11
   1  19  15    1.34    1.60
  -1 -19 -15    1.98    0.78
  -1 -19 -16    3.96    0.81
   1  19  16    4.61    1.27
  -1 -20  -5    2.61    0.79
   1  20   6    2.36    1.17
  -1 -20  -6    1.56    0.85
  -1 -20  -6    2.57    0.77
  -1 -20  -7   12.92    1.08
   1  20   8    1.86    1.50
  -1 -20  -8    0.66    0.92
  -1 -20  -8    0.65    0.71
  -1 -20  -8   -0.27    0.80
   1  20   9    1.07    1.46
  -1 -20  -9   -0.61    0.94
  -1 -20  -9    0.52    0.70
  -1 -20  -9   -0.25    0.80
  -1 -20 -10   49.97    2.56
  -1 -20 -10   48.41    2.52
  -1 -20 -10   52.60    2.51
   1  20  11    1.30    1.35
  -1 -20 -11    0.91    0.68
  -1 -20 -11   -0.43    0.73
  -1 -20 -11    0.64    0.66
   1  20  12   13.96    1.48
  -1 -20 -12   15.14    1.29
   2 -19 -10    1.25    0.75
   2 -19 -10    1.67    0.65
   2 -19 -10    1.14    0.61
   2 -19  -9    0.94    0.74
   2 -19  -9    1.25    0.78
   2 -19  -9    2.11    0.72
   2 -19  -9    1.27    0.65
   2 -19  -8    0.70    0.83
   2 -19  -8    1.36    0.74
   2 -19  -8    0.34    0.66
   2 -19  -7    0.77    0.81
   2 -19  -6    5.70    0.67
   2 -19  -6    6.97    0.75
   2 -19  -6    5.15    0.87
   2 -19  -5    4.15    0.75
   2 -18 -14   18.38    1.38
   2 -18 -14   22.93    1.43
   2 -18 -13   21.10    1.51
   2 -18 -13   19.23    1.27
   2 -18 -13   16.21    1.10
   2 -18 -12   11.87    1.47
   2 -18 -12   14.37    1.33
   2 -18 -12   13.14    1.12
   2 -18 -12   12.16    1.10
   2 -18 -11   25.15    1.79
   2 -18 -11   22.11    1.89
   2 -18 -11   22.26    1.66
   2 -18 -11   24.86    1.59
   2 -18 -10    2.23    0.99
   2 -18 -10    1.75    1.12
   2 -18 -10    0.07    1.33
   2 -18  -9    1.15    1.02
   2 -18  -9   -0.03    1.39
   2 -18  -9    0.46    1.35
   2 -18  -9   -0.61    1.14
   2 -18  -8    8.41    1.36
   2 -18  -8   11.03    1.13
   2 -18  -8   10.61    1.21
   2 -18  -8    8.89    1.42
   2 -18  -8    6.36    1.53
   2 -18  -8    7.68    1.28
  -2  18   8    5.13    1.59
   2 -18  -7   12.89    1.47
   2 -18  -7   10.20    1.60
   2 -18  -7   12.88    1.07
  -2  18   7    8.66    1.70
   2 -18  -7   11.33    1.39
   2 -18  -7   12.47    1.47
   2 -18  -6   11.30    1.09
   2 -18  -6   13.82    1.30
   2 -18  -5    3.28    0.76
   2 -18  -5    2.58    1.12
   2 -18  -5    4.67    0.99
   2 -18  -4    9.27    0.85
   2 -18  -4   10.48    1.15
   2 -18  -4   10.03    0.96
   2 -18  -3    1.72    0.64
   2 -18  -3    3.12    0.69
   2 -18  -2   23.17    1.27
   2 -18  -2   20.84    1.26
   2 -17 -17   31.92    1.75
   2 -17 -16   10.84    1.22
   2 -17 -15    2.88    0.98
   2 -17 -15    1.37    0.90
   2 -17 -15    1.57    1.08
  -2  17  15    2.99    1.43
   2 -17 -14   -0.36    1.39
   2 -17 -14    1.45    1.30
   2 -17 -14    1.90    1.11
   2 -17 -14    0.27    0.97
   2 -17 -14    1.78    1.03
   2 -17 -13   33.84    2.02
   2 -17 -13   33.44    2.35
   2 -17 -13   29.47    2.11
   2 -17 -13   31.70    2.28
   2 -17 -13   27.43    1.89
   2 -17 -13   31.90    1.86
   2 -17 -13   35.24    1.98
   2 -17 -12   39.87    2.46
   2 -17 -12   41.63    2.40
   2 -17 -12   37.62    2.63
   2 -17 -12   37.14    2.74
   2 -17 -12   34.18    2.63
   2 -17 -12   47.36    2.38
   2 -17 -12   45.28    2.39
   2 -17 -11   23.81    1.70
   2 -17 -11   22.90    1.87
   2 -17 -11   21.21    1.67
   2 -17 -11   17.99    1.97
   2 -17 -11   25.59    1.67
   2 -17 -11   21.85    2.20
   2 -17 -11   21.13    2.07
   2 -17 -11   17.26    1.79
  -2  17  11   13.46    2.20
   2 -17 -10   56.32    3.22
   2 -17 -10   57.26    3.38
   2 -17 -10   54.24    3.42
   2 -17 -10   66.61    3.08
   2 -17 -10   63.46    3.13
   2 -17 -10   44.71    3.15
  -2  17  10   38.82    3.41
   2 -17  -9    0.36    1.49
   2 -17  -9    3.74    1.14
   2 -17  -9   -1.03    1.89
   2 -17  -9    0.31    1.19
   2 -17  -9    0.31    1.42
   2 -17  -8   26.63    2.24
   2 -17  -8   31.10    2.13
   2 -17  -8   25.91    1.93
   2 -17  -7    6.72    1.69
   2 -17  -7    7.29    1.66
  -2  17   7    8.99    1.92
   2 -17  -7    8.27    1.51
   2 -17  -7    9.80    1.38
   2 -17  -7    9.49    1.35
   2 -17  -6   29.83    1.90
   2 -17  -6   22.67    1.87
   2 -17  -6   24.18    2.21
  -2  17   6   22.81    2.29
   2 -17  -6   23.49    2.13
   2 -17  -5    7.38    1.63
  -2  17   5    7.80    1.71
   2 -17  -5    7.52    1.58
   2 -17  -5    9.79    1.30
   2 -17  -5    8.58    1.39
   2 -17  -5    8.35    1.06
   2 -17  -5    7.32    1.34
   2 -17  -4    2.24    1.36
  -2  17   4    1.69    1.47
   2 -17  -4    3.54    1.41
   2 -17  -4    2.18    1.07
   2 -17  -4    2.44    0.95
   2 -17  -4    3.50    1.22
   2 -17  -4    3.21    1.23
   2 -17  -3    6.83    1.36
   2 -17  -3    5.89    1.34
  -2  17   3    5.12    1.41
   2 -17  -3    8.29    1.11
   2 -17  -3    5.76    1.27
   2 -17  -3    6.58    1.20
   2 -17  -3    6.25    1.07
   2 -17  -2    0.50    1.09
   2 -17  -2    0.43    0.92
   2 -17  -1    4.73    1.11
   2 -17  -1    5.24    0.98
   2 -17   0    0.60    0.94
   2 -17   0    2.42    0.88
   2 -17   1    2.98    0.82
   2 -17   1    2.07    0.72
   2 -17   2    5.43    0.65
   2 -16 -18    2.02    0.84
   2 -16 -18    0.48    0.67
   2 -16 -18   -0.42    0.88
   2 -16 -17   21.75    1.51
   2 -16 -17   20.13    1.71
  -2  16  16   13.68    1.83
   2 -16 -16   12.65    1.72
   2 -16 -16   13.25    1.36
   2 -16 -16   13.20    1.27
   2 -16 -15    4.54    1.68
   2 -16 -15    5.42    1.41
   2 -16 -15    4.16    1.25
   2 -16 -15    5.38    1.29
  -2  16  15    3.27    1.83
   2 -16 -14    2.92    1.40
   2 -16 -14   -0.38    1.60
   2 -16 -14    1.92    0.89
   2 -16 -14    2.44    1.30
   2 -16 -13    3.29    1.64
   2 -16 -13   -2.14    1.82
   2 -16 -13    0.51    1.22
   2 -16 -13    1.14    1.29
   2 -16 -13    1.51    1.09
   2 -16 -12   25.74    2.03
   2 -16 -12   25.14    2.08
  -2  16  12   21.25    2.48
   2 -16 -12   20.57    2.04
   2 -16 -12   24.82    2.37
   2 -16 -12   23.51    2.51
   2 -16 -12   33.97    1.97
   2 -16 -12   29.53    1.98
   2 -16 -11    0.49    1.55
   2 -16 -11    2.22    1.37
   2 -16 -11    3.45    1.60
   2 -16 -11    0.45    1.96
   2 -16 -11    1.02    1.23
   2 -16 -11    1.97    1.33
   2 -16 -10    0.61    1.28
   2 -16 -10    0.16    1.61
   2 -16 -10    0.62    1.59
   2 -16 -10    4.02    1.36
   2 -16 -10   -0.48    2.10
   2 -16 -10    2.00    1.29
   2 -16 -10    1.94    1.42
   2 -16  -9    1.73    1.38
   2 -16  -9   -0.09    1.69
   2 -16  -9   -0.52    1.46
   2 -16  -9   -1.63    1.78
   2 -16  -9    0.63    1.26
   2 -16  -8    8.12    1.57
   2 -16  -8    6.03    1.36
   2 -16  -8    8.12    1.92
   2 -16  -8   10.20    1.64
   2 -16  -7    6.22    1.86
   2 -16  -7    3.66    1.91
   2 -16  -7    3.08    1.43
   2 -16  -7    2.22    1.57
   2 -16  -7    4.40    1.52
   2 -16  -6   10.74    1.97
   2 -16  -6   14.52    1.64
   2 -16  -6   11.99    1.32
   2 -16  -6   12.12    1.73
   2 -16  -5    0.33    1.77
   2 -16  -5    0.08    1.53
   2 -16  -5    1.80    1.35
   2 -16  -5    0.03    1.10
   2 -16  -5   -0.30    1.47
   2 -16  -4    8.85    1.85
   2 -16  -4    7.75    1.84
   2 -16  -4    9.14    1.69
   2 -16  -4   11.54    1.54
   2 -16  -4   11.26    1.39
   2 -16  -4    9.85    1.63
   2 -16  -3    0.63    1.60
   2 -16  -3    1.14    1.60
   2 -16  -3   -0.46    1.45
   2 -16  -3    1.01    1.23
   2 -16  -3    1.06    1.32
   2 -16  -3    0.46    1.20
   2 -16  -2    1.64    1.46
   2 -16  -2    2.63    1.49
  -2  16   2    2.98    1.50
   2 -16  -2    3.10    1.26
   2 -16  -2    3.97    1.27
   2 -16  -2    3.68    1.18
   2 -16  -2    1.53    1.44
   2 -16  -1    3.33    1.31
  -2  16   1    2.76    1.29
   2 -16  -1    2.72    1.39
   2 -16  -1    3.22    1.24
   2 -16  -1    3.00    1.07
   2 -16   0   16.85    1.55
   2 -16   0   17.29    1.74
   2 -16   1    0.08    1.02
   2 -16   1   -0.62    1.23
   2 -16   2    9.74    1.16
   2 -16   2    8.56    1.25
   2 -16   3   -0.55    0.90
   2 -16   4   11.85    0.89
   2 -16   4   10.10    0.94
   2 -15 -19    4.70    0.95
   2 -15 -19    6.73    0.75
   2 -15 -18    2.63    1.21
   2 -15 -18    0.89    0.97
  -2  15  17    1.80    1.49
   2 -15 -17    2.70    1.48
   2 -15 -17    1.50    1.15
   2 -15 -16   28.46    2.02
   2 -15 -16   29.78    1.71
  -2  15  16   25.37    2.34
   2 -15 -16   23.25    1.91
   2 -15 -16   24.07    2.40
   2 -15 -15   27.42    2.21
   2 -15 -15   28.04    2.29
   2 -15 -15   32.34    1.89
   2 -15 -14    8.14    1.19
   2 -15 -14    5.67    1.92
   2 -15 -14    8.91    1.87
   2 -15 -13   -1.15    2.02
   2 -15 -13    3.70    1.92
   2 -15 -13    2.93    1.39
   2 -15 -13    4.75    1.61
   2 -15 -13    3.71    1.25
   2 -15 -12   11.65    1.79
   2 -15 -12   15.17    1.92
   2 -15 -12   11.53    2.33
   2 -15 -12   19.95    1.70
   2 -15 -12   12.78    1.82
   2 -15 -12   17.39    1.72
   2 -15 -11   35.64    2.67
   2 -15 -11   36.85    2.62
   2 -15 -11   39.24    3.10
   2 -15 -11   35.45    2.44
   2 -15 -11   39.79    2.77
   2 -15 -11   37.12    2.58
   2 -15 -10    1.26    1.52
   2 -15 -10    2.84    1.77
   2 -15 -10    5.03    1.62
   2 -15 -10    3.33    1.44
   2 -15 -10    1.38    1.88
   2 -15 -10    2.21    1.58
   2 -15  -9    2.06    1.45
   2 -15  -9    6.54    1.90
   2 -15  -9    6.52    1.62
   2 -15  -9    5.36    1.51
   2 -15  -9    2.05    1.94
   2 -15  -9    4.56    1.66
   2 -15  -8    6.96    1.68
   2 -15  -8    3.69    1.46
   2 -15  -8    8.54    1.95
   2 -15  -8    3.16    1.67
   2 -15  -7    0.40    1.33
   2 -15  -7    3.84    1.84
   2 -15  -7    2.68    1.71
   2 -15  -7    2.70    1.53
   2 -15  -7    3.90    1.96
   2 -15  -7    0.98    1.64
   2 -15  -6   88.54    4.70
   2 -15  -6   76.02    4.23
   2 -15  -6   83.87    4.57
   2 -15  -6   90.47    4.48
   2 -15  -6   85.26    4.77
   2 -15  -6   81.08    4.25
   2 -15  -6   77.08    4.46
   2 -15  -5   13.13    1.48
   2 -15  -5   16.68    1.84
   2 -15  -5   11.36    2.27
   2 -15  -5   13.96    2.06
   2 -15  -5   13.10    1.35
   2 -15  -5   15.21    1.64
   2 -15  -4  104.87    5.46
   2 -15  -4  112.74    5.29
   2 -15  -4   96.40    5.35
   2 -15  -4  105.07    5.30
   2 -15  -4  101.98    5.15
   2 -15  -3   85.57    4.47
   2 -15  -3   84.04    4.47
   2 -15  -3   74.63    4.17
   2 -15  -3   70.67    4.45
   2 -15  -3   77.32    4.15
   2 -15  -3   77.45    4.26
   2 -15  -2    5.93    1.80
   2 -15  -2    7.21    1.41
   2 -15  -2   10.22    1.54
   2 -15  -2    6.06    1.87
   2 -15  -2   10.20    1.57
   2 -15  -2    9.89    1.61
   2 -15  -1    5.34    1.49
   2 -15  -1    4.28    1.41
   2 -15  -1    4.56    1.66
   2 -15  -1    5.19    1.35
   2 -15  -1    4.92    1.69
  -2  15   1    1.31    1.26
   2 -15  -1    2.37    1.18
  -2  15   0    0.92    1.16
   2 -15   0    1.55    1.13
   2 -15   0    2.13    1.17
   2 -15   0    2.07    1.46
  -2  15   0    2.32    1.39
   2 -15   0    1.80    0.99
   2 -15   0    2.00    1.41
   2 -15   1   29.88    1.98
   2 -15   1   33.53    2.04
   2 -15   1   33.83    2.25
  -2  15  -1   26.32    2.00
   2 -15   2    2.96    1.01
   2 -15   2    2.50    0.98
   2 -15   2    2.26    1.27
  -2  15  -2    2.78    0.96
   2 -15   3    4.19    0.88
   2 -15   3    4.11    0.97
   2 -15   4    4.38    0.71
   2 -15   4    3.47    0.90
   2 -15   5    1.99    0.72
   2 -15   5    0.47    0.76
  -2  14  20    1.62    0.97
   2 -14 -19    2.17    1.20
   2 -14 -19    2.85    0.99
   2 -14 -19    2.00    0.92
   2 -14 -18    9.06    0.95
   2 -14 -18    6.50    1.23
   2 -14 -18    4.43    1.51
  -2  14  17   36.53    2.84
   2 -14 -17   43.06    2.66
   2 -14 -17   37.88    2.87
   2 -14 -16    3.08    1.59
   2 -14 -16   -1.79    1.45
   2 -14 -16    2.80    1.49
  -2  14  16    0.08    1.93
   2 -14 -16    1.84    0.97
   2 -14 -16   -2.91    2.00
   2 -14 -15   73.69    4.43
   2 -14 -15   78.64    4.40
   2 -14 -14   16.10    2.18
   2 -14 -14   14.33    2.21
   2 -14 -14   12.45    1.41
   2 -14 -13   25.02    1.98
   2 -14 -13   21.52    2.06
   2 -14 -13   24.41    2.33
   2 -14 -13   26.62    1.96
   2 -14 -13   27.04    2.67
   2 -14 -13   28.54    1.91
   2 -14 -12  113.57    5.70
   2 -14 -12  109.14    5.81
   2 -14 -12  112.13    5.88
   2 -14 -12  121.40    5.69
   2 -14 -12  127.92    5.67
   2 -14 -12  116.03    6.08
   2 -14 -12   95.86    5.80
   2 -14 -11   19.68    2.09
   2 -14 -11   24.17    2.22
   2 -14 -11   22.61    2.26
   2 -14 -11   27.09    2.06
   2 -14 -11   29.19    1.90
   2 -14 -11   16.87    2.73
   2 -14 -11   21.73    2.21
   2 -14 -11   16.70    2.27
   2 -14 -10    2.69    1.97
   2 -14 -10    2.98    1.63
   2 -14 -10    5.93    1.83
   2 -14 -10    4.27    1.58
   2 -14 -10    4.32    1.71
   2 -14 -10    3.20    1.61
   2 -14  -9    3.44    1.67
   2 -14  -9    3.62    2.68
   2 -14  -9    3.96    2.10
   2 -14  -9    3.08    2.91
   2 -14  -9    8.31    1.96
   2 -14  -9    2.59    1.60
   2 -14  -9    5.10    3.27
   2 -14  -9    5.47    1.61
   2 -14  -9    7.20    1.81
   2 -14  -8    2.52    2.04
   2 -14  -8   -0.41    1.40
   2 -14  -8    0.97    1.75
   2 -14  -8   -3.14    2.96
   2 -14  -8   -2.24    1.78
   2 -14  -8   -4.79    3.03
   2 -14  -8   -0.35    2.72
   2 -14  -8    1.73    2.54
   2 -14  -8    1.71    2.83
   2 -14  -8    3.02    1.71
   2 -14  -7   21.27    2.51
   2 -14  -7   20.03    2.01
   2 -14  -7   29.49    2.23
   2 -14  -7   17.70    2.30
   2 -14  -7   35.05    3.79
   2 -14  -7   37.61    4.13
   2 -14  -6    3.30    2.10
   2 -14  -6    6.12    2.85
   2 -14  -6    1.95    2.90
   2 -14  -6    6.03    2.94
   2 -14  -6    2.22    1.15
   2 -14  -6    3.66    1.33
   2 -14  -6    3.62    1.91
   2 -14  -6    3.75    1.34
   2 -14  -6   -1.22    2.93
   2 -14  -6    4.26    1.59
   2 -14  -6    2.64    1.78
   2 -14  -5   43.48    3.58
   2 -14  -5   65.59    5.06
   2 -14  -5   72.01    5.11
   2 -14  -5   48.94    3.00
   2 -14  -5   42.42    2.89
   2 -14  -5   40.00    4.98
   2 -14  -5   60.06    5.17
   2 -14  -5   58.38    3.26
   2 -14  -5   49.65    3.42
   2 -14  -4   19.93    2.45
   2 -14  -4   22.35    3.63
   2 -14  -4   24.36    3.81
   2 -14  -4   18.13    1.68
   2 -14  -4   18.14    1.93
   2 -14  -4   19.70    3.78
   2 -14  -4   22.42    2.08
   2 -14  -4   18.02    1.91
   2 -14  -4   18.31    3.55
   2 -14  -4   20.14    2.15
   2 -14  -3  107.04    5.93
  -2  14   3   99.47    5.69
   2 -14  -3  116.65    5.89
   2 -14  -3  104.60    5.38
   2 -14  -3  116.70    5.70
   2 -14  -3   95.10    7.53
   2 -14  -3  120.71    5.67
   2 -14  -3  112.67    5.63
   2 -14  -3  113.60    5.69
   2 -14  -2    0.46    1.55
   2 -14  -2    0.95    1.45
   2 -14  -2    2.55    1.78
   2 -14  -2    1.11    1.38
   2 -14  -2    1.52    1.86
  -2  14   2    1.00    1.49
   2 -14  -2    0.63    1.54
  -2  14   1   31.80    2.60
   2 -14  -1   38.29    2.55
   2 -14  -1   36.43    2.56
   2 -14  -1   32.59    2.84
   2 -14  -1   33.33    2.34
   2 -14  -1   43.86    2.75
   2 -14  -1   38.04    2.62
   2 -14  -1   38.37    2.56
  -2  14   0   71.27    4.30
   2 -14   0   76.82    4.14
   2 -14   0   85.40    4.29
   2 -14   0   75.07    4.39
   2 -14   0   80.82    4.18
   2 -14   0   81.31    4.37
   2 -14   0   78.69    4.30
   2 -14   0   80.82    4.20
  -2  14  -1    0.75    1.37
   2 -14   1    0.63    1.21
   2 -14   1    0.55    1.53
   2 -14   1    0.08    1.32
   2 -14   1    0.37    1.51
   2 -14   1    1.44    1.28
   2 -14   2    2.64    1.27
   2 -14   2   -0.08    1.26
   2 -14   2    0.18    1.09
  -2  14  -2   -0.38    1.25
   2 -14   2    0.56    1.52
  -2  14  -3    0.44    1.09
   2 -14   3   -0.47    1.07
   2 -14   3   -0.26    1.23
   2 -14   3    0.24    1.12
   2 -14   4    1.29    1.03
  -2  14  -4    1.26    0.99
   2 -14   4    0.62    1.20
   2 -14   4    1.78    1.02
   2 -14   5    0.86    0.85
   2 -14   5    0.49    1.03
   2 -14   5    1.28    0.92
  -2  14  -5    0.90    0.78
   2 -14   5    0.48    1.09
   2 -14   6    1.19    0.69
   2 -14   6    0.94    0.93
   2 -14   6    0.29    0.89
   2 -14   6    0.80    0.78
   2 -14   7    5.67    0.87
   2 -14   7    3.27    0.65
   2 -13 -20    1.64    0.92
   2 -13 -19    3.70    1.02
   2 -13 -19    4.22    1.20
   2 -13 -19    5.01    0.83
   2 -13 -18    0.85    1.24
   2 -13 -18    1.95    1.53
   2 -13 -18    1.16    0.87
   2 -13 -17    0.75    0.98
   2 -13 -17   -0.60    1.92
  -2  13  17    2.40    1.84
   2 -13 -17    3.61    1.65
   2 -13 -16   92.15    4.89
  -2  13  16   82.20    4.99
   2 -13 -16   85.54    4.73
   2 -13 -16   81.91    4.66
   2 -13 -15    9.72    1.60
   2 -13 -15   10.66    2.02
   2 -13 -15   16.30    2.08
   2 -13 -15   10.27    1.40
   2 -13 -15   15.46    2.07
   2 -13 -14    0.36    1.43
   2 -13 -14    3.03    2.07
   2 -13 -14   -2.24    2.08
   2 -13 -14    1.05    1.20
   2 -13 -13    0.58    1.27
   2 -13 -13    0.53    1.45
   2 -13 -13   -0.69    1.42
   2 -13 -13    1.15    1.25
   2 -13 -13    1.59    1.18
   2 -13 -13    0.15    2.23
   2 -13 -13    2.25    1.49
   2 -13 -12    8.21    1.96
   2 -13 -12   19.19    1.63
   2 -13 -12   13.12    2.02
   2 -13 -12   12.81    1.89
   2 -13 -12   17.74    1.79
   2 -13 -12   10.81    2.44
   2 -13 -12   15.00    1.78
   2 -13 -11    7.44    1.60
   2 -13 -11    8.40    2.76
   2 -13 -11    6.68    1.99
   2 -13 -11   13.51    3.08
   2 -13 -11   10.28    1.44
   2 -13 -11    7.54    2.63
   2 -13 -11   10.19    3.10
   2 -13 -11    9.06    1.82
   2 -13 -11    6.10    1.76
   2 -13 -11    6.71    3.06
   2 -13 -11    9.47    1.62
   2 -13 -11   10.50    1.90
   2 -13 -11    6.59    2.44
   2 -13 -10   21.23    2.22
   2 -13 -10   17.15    1.98
   2 -13 -10   21.43    3.54
   2 -13 -10   21.87    2.19
   2 -13 -10   14.91    2.11
   2 -13 -10   18.40    3.47
   2 -13 -10   24.69    1.85
   2 -13 -10   16.86    3.43
   2 -13 -10   21.27    3.30
   2 -13 -10   20.12    3.47
   2 -13 -10   17.32    2.32
   2 -13 -10   21.88    2.01
   2 -13  -9    2.71    1.91
   2 -13  -9    0.52    1.19
   2 -13  -9    0.14    2.50
   2 -13  -9    0.94    2.82
   2 -13  -9   -1.18    2.95
   2 -13  -9   -1.88    1.63
   2 -13  -9    2.69    1.76
   2 -13  -9    4.23    3.12
   2 -13  -9    2.65    1.56
   2 -13  -9    2.84    1.82
   2 -13  -9    5.64    1.43
   2 -13  -8    3.02    2.00
   2 -13  -8    4.62    1.82
   2 -13  -8    3.29    1.48
   2 -13  -8    1.31    1.84
   2 -13  -8    4.32    1.37
   2 -13  -8    4.10    3.13
   2 -13  -8    6.45    1.65
   2 -13  -8    3.59    2.99
   2 -13  -8    3.29    2.93
   2 -13  -8    2.75    2.55
   2 -13  -7  152.81    7.17
   2 -13  -7  151.05    7.54
   2 -13  -7  146.24    7.31
   2 -13  -7  135.80    7.22
   2 -13  -7  182.66    9.22
   2 -13  -7  196.87    9.54
   2 -13  -7  150.44    7.49
   2 -13  -6    0.52    1.20
   2 -13  -6    0.83    2.19
   2 -13  -6    5.38    2.87
   2 -13  -6    0.15    2.53
   2 -13  -6    1.57    1.35
   2 -13  -6    1.45    1.79
   2 -13  -6   -0.59    2.96
   2 -13  -6    2.31    1.58
   2 -13  -6    2.43    2.98
   2 -13  -6   -0.19    1.30
   2 -13  -6   -0.91    1.90
   2 -13  -5   21.77    2.34
   2 -13  -5   21.33    2.06
   2 -13  -5   18.40    1.87
   2 -13  -5   18.50    2.33
   2 -13  -5   18.72    1.80
   2 -13  -5   17.19    3.49
   2 -13  -5   18.70    2.03
   2 -13  -5   19.08    3.43
   2 -13  -5   22.01    3.54
   2 -13  -5   24.87    2.74
   2 -13  -5   22.03    1.81
   2 -13  -5   19.67    3.97
   2 -13  -4    7.92    3.51
   2 -13  -4    6.01    1.63
  -2  13   4    7.51    1.71
   2 -13  -4    7.92    1.55
   2 -13  -4    7.68    1.39
   2 -13  -4    8.68    3.17
   2 -13  -4    6.63    2.94
   2 -13  -4    6.79    2.31
   2 -13  -4    8.10    1.75
   2 -13  -4   10.71    3.41
   2 -13  -3   13.18    1.77
  -2  13   3   14.25    1.88
   2 -13  -3   13.74    2.46
   2 -13  -3   14.32    1.41
   2 -13  -3   15.18    3.39
   2 -13  -3   13.23    1.50
   2 -13  -3   14.28    2.16
   2 -13  -3   10.46    3.64
   2 -13  -3   18.28    3.45
   2 -13  -3   14.92    1.85
   2 -13  -2    0.39    3.10
   2 -13  -2    1.00    1.51
  -2  13   2    0.89    1.63
   2 -13  -2   -0.36    2.85
   2 -13  -2   -1.71    1.69
   2 -13  -2    0.87    1.05
   2 -13  -2    2.42    1.88
   2 -13  -2    0.67    2.84
   2 -13  -2    0.95    2.89
   2 -13  -2    1.40    0.97
   2 -13  -2    1.29    2.08
   2 -13  -2    1.06    1.52
   2 -13  -1   56.63    3.75
   2 -13  -1   54.49    3.00
   2 -13  -1   67.53    5.22
   2 -13  -1   63.25    3.53
  -2  13   1   55.39    3.57
   2 -13  -1   54.81    3.26
   2 -13  -1   58.57    3.63
   2 -13  -1   44.61    5.17
   2 -13  -1   58.30    5.06
   2 -13  -1   53.38    3.38
   2 -13  -1   68.94    5.23
   2 -13  -1   57.53    3.33
   2 -13   0    0.81    1.85
   2 -13   0    2.58    2.82
   2 -13   0    1.89    2.70
   2 -13   0    1.95    1.31
  -2  13   0    3.85    1.71
   2 -13   0    3.06    1.39
   2 -13   0    6.36    1.79
   2 -13   0   -0.37    2.77
   2 -13   0    1.66    1.46
   2 -13   0   -1.18    2.68
   2 -13   0   -0.12    1.54
   2 -13   0    0.38    1.45
   2 -13   1   64.43    3.69
   2 -13   1   70.70    3.58
   2 -13   1   64.21    3.66
   2 -13   1   60.55    3.74
   2 -13   1   63.46    3.73
   2 -13   1   68.42    3.63
  -2  13  -1   59.15    3.82
   2 -13   1   61.90    3.64
   2 -13   1   61.91    3.83
   2 -13   2   53.95    3.31
  -2  13  -2   52.99    3.43
   2 -13   2   61.74    3.44
   2 -13   2   49.24    3.30
   2 -13   2   56.11    3.40
   2 -13   2   59.92    3.37
   2 -13   3    0.60    1.36
   2 -13   3    2.41    1.41
  -2  13  -3    0.15    1.45
   2 -13   3    0.72    1.37
   2 -13   4    3.39    1.52
  -2  13  -4    2.22    1.35
   2 -13   4    5.16    1.45
   2 -13   4    1.93    1.32
  -2  13  -5   14.55    1.55
   2 -13   5   14.10    1.60
   2 -13   5   14.78    1.76
   2 -13   5   15.61    1.67
   2 -13   5   14.67    1.57
  -2  13  -6   33.48    2.10
   2 -13   6   32.12    2.27
   2 -13   6   39.59    2.43
   2 -13   6   35.91    2.26
   2 -13   6   32.94    2.17
  -2  13  -7   18.24    1.27
   2 -13   7   15.54    1.48
   2 -13   7   18.68    1.38
   2 -13   7   18.07    1.61
   2 -13   8   -0.09    0.86
   2 -13   8    0.19    0.67
   2 -13   8    0.28    0.92
   2 -13   9    1.75    0.60
   2 -13   9    1.65    0.70
  -2  12  21    4.97    0.97
   2 -12 -20   13.50    1.35
   2 -12 -20   12.54    1.01
   2 -12 -19    5.05    1.18
   2 -12 -19    5.88    1.30
   2 -12 -19    4.83    0.94
   2 -12 -18    8.61    1.50
   2 -12 -18    7.23    1.74
   2 -12 -18    8.15    1.13
   2 -12 -17    0.97    1.03
   2 -12 -17   -0.46    1.95
  -2  12  17    2.89    1.93
   2 -12 -16    1.32    1.43
   2 -12 -16    0.75    1.12
   2 -12 -16    2.82    1.85
  -2  12  16    1.14    2.13
   2 -12 -15    3.03    1.86
   2 -12 -15    1.53    1.53
   2 -12 -15    6.31    1.98
   2 -12 -15    1.86    1.84
   2 -12 -15    0.50    1.19
   2 -12 -14    0.91    1.86
   2 -12 -14   -1.39    2.06
   2 -12 -14    4.66    2.15
   2 -12 -14   -1.41    1.22
   2 -12 -14    0.65    1.55
   2 -12 -13   44.30    2.72
   2 -12 -13   52.10    2.74
   2 -12 -13   39.71    3.35
   2 -12 -13   56.18    2.83
   2 -12 -13   56.81    4.60
   2 -12 -13   32.79    2.77
   2 -12 -13   36.92    2.86
   2 -12 -12   62.12    5.73
   2 -12 -12   75.16    4.24
   2 -12 -12   82.16    4.36
   2 -12 -12   80.61    4.83
   2 -12 -12   84.10    4.24
   2 -12 -12   82.29    5.91
   2 -12 -12   86.48    6.03
   2 -12 -12   84.93    4.26
   2 -12 -12   74.14    4.44
   2 -12 -11   36.70    4.51
   2 -12 -11   48.43    4.65
   2 -12 -11   46.82    3.05
   2 -12 -11   48.31    3.11
   2 -12 -11   47.28    3.23
   2 -12 -11   45.28    3.65
   2 -12 -11   49.43    3.27
   2 -12 -11   54.69    2.96
   2 -12 -11   56.59    4.71
   2 -12 -11   51.00    4.79
   2 -12 -11   52.03    3.03
   2 -12 -11   45.25    3.18
   2 -12 -10  224.81   10.43
   2 -12 -10  204.58   10.14
   2 -12 -10  223.35   11.90
   2 -12 -10  214.67   10.32
   2 -12 -10  211.47   10.34
   2 -12 -10  232.54   10.40
   2 -12 -10  217.72   11.93
   2 -12 -10  224.86   10.22
   2 -12 -10  203.09   12.11
   2 -12  -9    1.12    1.12
   2 -12  -9    0.71    1.96
   2 -12  -9    0.61    2.52
   2 -12  -9    0.22    1.29
   2 -12  -9   -0.14    2.39
   2 -12  -9    1.25    1.58
   2 -12  -9    2.62    1.74
   2 -12  -9    3.85    1.82
   2 -12  -9    1.40    1.40
   2 -12  -9    0.08    1.44
   2 -12  -9    2.24    2.89
   2 -12  -9   -0.18    3.06
   2 -12  -8   55.36    3.24
   2 -12  -8   53.70    5.27
   2 -12  -8   55.87    3.08
   2 -12  -8   55.81    3.50
   2 -12  -8   60.21    3.34
   2 -12  -8   56.83    3.53
   2 -12  -8   44.09    4.49
   2 -12  -8   51.19    3.14
   2 -12  -8   45.24    4.67
   2 -12  -8   56.43    3.35
   2 -12  -8   58.19    5.11
   2 -12  -8   61.85    3.70
   2 -12  -7   19.74    2.22
   2 -12  -7   20.09    1.86
   2 -12  -7   17.72    1.63
   2 -12  -7   19.22    2.24
   2 -12  -7   14.56    3.71
   2 -12  -7   17.83    1.82
   2 -12  -7   19.48    3.23
   2 -12  -7   24.36    3.49
   2 -12  -7   22.83    1.82
   2 -12  -6   34.92    2.42
   2 -12  -6   34.44    2.83
   2 -12  -6   35.47    2.37
   2 -12  -6   33.90    2.72
   2 -12  -6   34.19    2.44
   2 -12  -6   46.39    4.21
   2 -12  -6   45.38    4.15
   2 -12  -6   37.82    2.61
   2 -12  -6   41.60    4.44
   2 -12  -5   37.97    2.53
   2 -12  -5   34.71    4.63
   2 -12  -5   34.69    2.69
   2 -12  -5   35.73    2.49
   2 -12  -5   37.87    2.87
   2 -12  -5   38.32    2.48
   2 -12  -5   42.02    4.24
   2 -12  -5   44.10    4.21
   2 -12  -5   38.25    2.41
   2 -12  -5   38.94    3.12
   2 -12  -5   43.33    2.73
   2 -12  -5   49.92    4.66
   2 -12  -4   42.95    2.99
  -2  12   4   40.85    2.94
   2 -12  -4   44.28    3.37
   2 -12  -4   46.22    2.64
   2 -12  -4   52.25    4.49
   2 -12  -4   55.79    4.69
   2 -12  -4   43.91    2.69
   2 -12  -4   46.42    2.81
   2 -12  -4   39.21    4.92
   2 -12  -4   44.17    2.94
   2 -12  -4   44.85    4.61
   2 -12  -3    6.41    1.39
   2 -12  -3    5.84    1.57
  -2  12   3    6.57    1.67
   2 -12  -3    6.26    2.08
   2 -12  -3    7.13    1.19
   2 -12  -3   11.65    3.23
   2 -12  -3    6.16    2.82
   2 -12  -3    6.48    1.80
   2 -12  -3    5.81    1.23
   2 -12  -3    3.73    3.11
   2 -12  -3    9.44    3.17
   2 -12  -3    7.61    1.63
   2 -12  -2    2.61    3.18
   2 -12  -2    1.15    1.28
   2 -12  -2    2.87    1.52
  -2  12   2    4.01    1.62
   2 -12  -2    2.26    1.27
   2 -12  -2    0.59    1.05
   2 -12  -2    3.13    1.73
   2 -12  -2    2.61    2.74
   2 -12  -2    1.34    1.03
  -2  12   2   -2.24    3.58
   2 -12  -2    2.65    2.03
   2 -12  -2    2.43    2.91
   2 -12  -2    1.18    1.50
   2 -12  -1   10.22    3.41
   2 -12  -1   10.87    1.79
   2 -12  -1   11.95    1.53
   2 -12  -1   13.88    1.66
  -2  12   1   11.48    1.86
   2 -12  -1   12.13    1.62
   2 -12  -1   10.81    1.29
   2 -12  -1   13.61    2.04
   2 -12  -1    9.42    2.98
   2 -12  -1   13.97    3.29
   2 -12  -1   10.10    1.24
   2 -12  -1   14.93    2.25
  -2  12   1    8.89    3.97
   2 -12  -1    8.10    1.66
  -2  12   0    1.97    3.36
   2 -12   0    1.17    1.93
   2 -12   0    2.74    0.96
   2 -12   0    9.46    3.01
   2 -12   0    8.20    3.03
   2 -12   0    1.10    3.07
   2 -12   0    1.68    1.26
   2 -12   0    3.04    1.59
   2 -12   0    1.34    1.31
  -2  12   0    3.10    1.69
   2 -12   0    1.72    1.43
   2 -12   0    4.34    1.78
   2 -12   0    1.57    1.47
   2 -12   0    2.86    2.72
   2 -12   0    7.34    1.59
  -2  12  -1   21.32    4.24
   2 -12   1   28.51    2.53
   2 -12   1   30.58    2.31
   2 -12   1   29.92    2.40
  -2  12  -1   30.25    2.50
   2 -12   1   32.10    2.44
   2 -12   1   30.28    2.34
   2 -12   1   29.41    3.98
   2 -12   1   25.53    3.74
   2 -12   1   26.39    3.80
   2 -12   1   26.06    2.19
   2 -12   1   27.29    2.25
   2 -12   1   26.18    3.63
   2 -12   2   27.45    2.35
  -2  12  -2   24.70    2.46
   2 -12   2   25.26    2.31
   2 -12   2   26.42    2.32
   2 -12   2   33.66    4.17
   2 -12   2   29.35    2.10
   2 -12   2   29.88    2.26
   2 -12   2   25.17    2.40
   2 -12   2   27.90    2.15
   2 -12   3    2.79    1.60
   2 -12   3    2.96    2.88
  -2  12  -3    2.70    1.65
   2 -12   3    4.33    1.48
   2 -12   3    2.94    1.64
   2 -12   4    1.66    1.60
  -2  12  -4    1.72    1.56
   2 -12   4    2.23    1.44
   2 -12   4    2.78    1.41
   2 -12   4    1.38    1.52
   2 -12   5    1.21    1.60
  -2  12  -5    1.90    1.46
   2 -12   5    1.75    1.46
   2 -12   5    2.41    1.30
   2 -12   5    2.27    1.53
   2 -12   6    9.48    1.81
  -2  12  -6    9.53    1.56
   2 -12   6   10.07    1.54
   2 -12   6   11.48    1.45
   2 -12   6   10.24    1.57
   2 -12   7   75.92    4.03
  -2  12  -7   71.84    3.81
   2 -12   7   69.32    3.84
   2 -12   7   75.75    3.81
   2 -12   7   71.73    3.81
   2 -12   8   11.36    1.30
   2 -12   8   11.37    1.51
  -2  12  -8   10.98    1.18
   2 -12   9    4.49    0.89
   2 -12   9    4.32    1.17
   2 -12   9    3.92    1.14
  -2  12  -9    4.33    0.73
   2 -12  10    5.50    0.65
   2 -12  10    5.83    0.92
   2 -12  10    5.14    0.90
  -2  11  21   19.62    1.58
   2 -11 -20   -0.19    0.77
   2 -11 -20    1.25    1.21
   2 -11 -19    3.16    0.99
   2 -11 -19    4.83    1.19
   2 -11 -18    0.66    1.38
   2 -11 -18    1.45    1.67
   2 -11 -18    0.55    0.97
   2 -11 -17   17.09    1.84
   2 -11 -17   13.56    1.83
   2 -11 -17   21.27    1.61
   2 -11 -17   13.72    2.27
  -2  11  17   16.97    2.29
   2 -11 -16   48.86    3.06
   2 -11 -16   47.72    3.39
   2 -11 -16   47.24    3.10
   2 -11 -16   53.24    2.91
   2 -11 -16   51.07    3.25
  -2  11  16   40.17    3.37
   2 -11 -15   44.70    2.91
   2 -11 -15   49.25    3.33
   2 -11 -15   44.95    3.05
   2 -11 -15   50.48    2.81
   2 -11 -15   43.02    3.10
   2 -11 -15   45.63    3.30
  -2  11  15   41.60    3.47
   2 -11 -14   -0.08    1.38
   2 -11 -14    0.59    1.58
   2 -11 -14    1.92    1.99
  -2  11  14   -3.80    3.49
   2 -11 -14    0.15    2.54
   2 -11 -14   -0.42    1.23
   2 -11 -14   -0.25    1.99
   2 -11 -14    1.73    2.18
   2 -11 -13   48.62    3.45
   2 -11 -13   45.65    3.03
   2 -11 -13   43.13    2.77
   2 -11 -13   46.28    3.14
   2 -11 -13   50.91    4.52
   2 -11 -13   47.30    2.79
   2 -11 -13   45.90    2.66
   2 -11 -13   38.22    2.77
   2 -11 -12    9.29    2.85
  -2  11  12   11.35    3.41
   2 -11 -12    9.75    1.55
   2 -11 -12   14.99    1.73
   2 -11 -12    9.35    1.47
   2 -11 -12   11.21    2.42
   2 -11 -12    8.60    2.76
   2 -11 -12   12.92    2.89
   2 -11 -12   11.13    1.48
   2 -11 -12   10.62    1.52
   2 -11 -12    9.41    1.83
   2 -11 -11   -1.67    2.47
   2 -11 -11   -0.92    1.38
   2 -11 -11    2.26    1.70
   2 -11 -11   -0.44    2.41
   2 -11 -11    2.01    2.51
   2 -11 -11   -1.26    1.26
   2 -11 -11    2.00    1.52
   2 -11 -11    1.47    1.61
   2 -11 -11   -2.56    2.35
   2 -11 -11    1.12    1.33
  -2  11  11   -2.05    3.05
   2 -11 -11    2.78    2.83
   2 -11 -10   37.92    4.24
   2 -11 -10   36.92    2.49
   2 -11 -10   30.84    2.14
   2 -11 -10   35.83    2.53
   2 -11 -10   29.52    2.59
   2 -11 -10   36.01    2.70
   2 -11 -10   37.42    3.92
   2 -11 -10   35.78    2.35
   2 -11 -10   37.93    4.05
   2 -11 -10   36.62    2.42
   2 -11 -10   37.98    2.69
   2 -11  -9  271.08   16.02
   2 -11  -9  305.78   14.34
   2 -11  -9  303.54   14.19
   2 -11  -9  300.80   14.44
   2 -11  -9  305.50   14.39
   2 -11  -9  302.43   14.50
   2 -11  -9  358.53   16.15
   2 -11  -9  324.96   14.33
   2 -11  -9  302.12   14.46
   2 -11  -9  341.21   14.36
   2 -11  -9  363.08   16.24
   2 -11  -8    9.16    1.88
   2 -11  -8    8.59    1.51
   2 -11  -8   10.87    1.36
   2 -11  -8   12.53    1.85
   2 -11  -8   10.86    1.63
   2 -11  -8    8.33    2.03
   2 -11  -8   14.50    1.49
   2 -11  -8   13.40    2.75
   2 -11  -8   13.45    3.11
   2 -11  -8   12.26    1.63
   2 -11  -8    7.37    3.29
   2 -11  -7    2.64    1.75
   2 -11  -7    5.01    1.40
   2 -11  -7    6.15    1.89
   2 -11  -7    1.21    1.13
   2 -11  -7    4.32    1.60
   2 -11  -7    3.91    1.25
   2 -11  -7    1.78    1.23
   2 -11  -7    0.42    2.48
   2 -11  -7    0.52    2.27
   2 -11  -7    2.37    1.36
   2 -11  -7    4.14    2.71
   2 -11  -7    2.84    3.10
   2 -11  -6    4.15    1.21
   2 -11  -6    4.79    1.30
   2 -11  -6    4.38    1.62
   2 -11  -6    8.84    2.58
   2 -11  -6    7.53    1.39
   2 -11  -6    7.11    2.72
   2 -11  -6    5.84    1.13
   2 -11  -6    6.43    1.35
   2 -11  -6    6.34    1.48
   2 -11  -6    4.14    1.77
   2 -11  -5   17.68    3.62
   2 -11  -5   22.30    1.80
   2 -11  -5   17.03    1.89
  -2  11   5   19.42    1.84
   2 -11  -5   18.11    2.02
   2 -11  -5   18.82    1.72
   2 -11  -5   21.07    3.15
   2 -11  -5   22.89    3.29
   2 -11  -5   20.99    1.60
   2 -11  -5   20.36    2.33
   2 -11  -5   25.34    3.44
   2 -11  -5   20.11    1.91
   2 -11  -4   34.83    2.49
  -2  11   4   33.39    2.47
   2 -11  -4   34.18    2.88
   2 -11  -4   35.94    2.19
   2 -11  -4   41.11    4.03
   2 -11  -4   40.94    3.91
   2 -11  -4   35.27    2.26
   2 -11  -4   34.75    2.34
   2 -11  -4   34.14    4.47
   2 -11  -4   33.38    4.00
   2 -11  -4   37.84    2.48
   2 -11  -3   49.64    5.27
   2 -11  -3   62.00    3.41
   2 -11  -3   62.45    3.55
  -2  11   3   56.81    3.46
   2 -11  -3   56.46    3.55
   2 -11  -3   55.52    3.21
   2 -11  -3   71.26    5.09
   2 -11  -3   69.06    5.01
   2 -11  -3   58.70    3.17
   2 -11  -3   56.01    3.76
   2 -11  -3   69.81    5.17
   2 -11  -3   63.21    3.41
   2 -11  -2   15.48    3.40
   2 -11  -2   15.27    1.78
   2 -11  -2   13.23    1.61
  -2  11   2   12.40    1.77
   2 -11  -2   12.34    1.50
   2 -11  -2   16.01    1.93
   2 -11  -2   13.78    1.38
   2 -11  -2   17.16    2.96
   2 -11  -2   21.51    3.31
   2 -11  -2   14.38    1.35
   2 -11  -2   14.70    2.11
   2 -11  -2   15.56    3.14
   2 -11  -2   14.34    1.70
   2 -11  -1    3.27    3.15
   2 -11  -1   -0.08    1.21
   2 -11  -1    0.93    1.44
   2 -11  -1    0.68    1.23
  -2  11   1    2.01    1.59
   2 -11  -1    0.88    1.28
   2 -11  -1    1.59    1.61
   2 -11  -1    0.98    0.96
   2 -11  -1   -1.32    2.73
   2 -11  -1    0.73    0.94
  -2  11   1    0.20    4.00
   2 -11  -1    0.92    1.91
   2 -11  -1   -0.60    2.67
   2 -11  -1   -0.47    1.43
   2 -11   0  130.84    6.64
   2 -11   0  129.12    6.50
  -2  11   0  126.34    6.76
   2 -11   0  129.27    6.57
   2 -11   0  136.15    6.63
   2 -11   0  150.55    8.34
   2 -11   0  114.50    8.16
   2 -11   0  139.59    6.56
   2 -11   0  130.50    6.31
   2 -11   0  129.55    6.69
  -2  11   0  123.53    8.95
   2 -11   0  146.60    8.35
   2 -11   0  135.23    6.49
   2 -11   1   55.59    3.42
  -2  11  -1   46.66    5.64
   2 -11   1   52.89    2.90
   2 -11   1   54.36    3.25
   2 -11   1   56.82    3.43
   2 -11   1   61.49    3.25
  -2  11  -1   58.58    3.58
   2 -11   1   52.83    3.33
   2 -11   1   53.60    3.33
   2 -11   1   57.98    5.04
   2 -11   1   48.69    4.79
   2 -11   1   51.89    4.81
   2 -11   1   48.03    3.18
   2 -11   1   53.81    4.71
   2 -11   1   53.20    3.15
  -2  11  -2  136.24   10.86
   2 -11   2  175.41    9.24
   2 -11   2  202.82    9.25
   2 -11   2  198.43    9.18
   2 -11   2  199.13    9.31
  -2  11  -2  187.88    9.42
   2 -11   2  186.22    9.27
   2 -11   2  200.23    9.24
   2 -11   2  216.33   11.08
   2 -11   2  155.92   10.65
   2 -11   2  188.23   10.71
   2 -11   2  196.63    9.11
   2 -11   2  206.89    9.10
   2 -11   3   19.25    2.02
   2 -11   3   21.71    1.87
   2 -11   3   17.37    1.91
   2 -11   3   19.88    2.14
   2 -11   3   16.51    3.53
   2 -11   3   19.14    1.90
   2 -11   3   16.33    1.74
   2 -11   3   18.12    2.04
  -2  11  -3   20.75    3.99
  -2  11  -3   15.58    2.17
  -2  11  -4    1.68    1.73
   2 -11   4    1.09    1.31
   2 -11   4    3.07    1.68
  -2  11  -4    5.54    3.04
   2 -11   4    1.45    1.65
   2 -11   4    3.63    1.35
  -2  11  -5    6.66    1.73
   2 -11   5    6.33    1.82
   2 -11   5    4.19    1.47
   2 -11   5    9.66    1.75
   2 -11   5    7.70    1.36
   2 -11   5    7.01    1.67
  -2  11  -6    9.39    1.76
  -2  11  -6    8.34    1.35
   2 -11   6    7.49    1.84
   2 -11   6    7.89    1.54
   2 -11   6    8.81    1.37
   2 -11   6    8.96    1.64
  -2  11  -7    1.56    1.36
  -2  11  -7   -0.15    1.04
   2 -11   7    1.57    1.72
   2 -11   7    0.51    1.27
   2 -11   7    0.30    1.06
   2 -11   7    0.82    1.45
   2 -11   7    0.16    1.34
  -2  11  -8   31.69    2.18
  -2  11  -8   30.50    1.97
   2 -11   8   28.95    2.44
   2 -11   8   32.22    2.13
   2 -11   8   29.25    2.23
   2 -11   8   31.48    2.13
   2 -11   9    0.28    1.42
   2 -11   9    1.22    1.02
   2 -11   9    0.92    1.14
  -2  11  -9    2.35    1.04
  -2  11  -9    2.08    0.83
   2 -11  10   48.15    2.62
   2 -11  10   48.44    2.80
  -2  11 -10   46.51    2.48
   2 -11  11   53.78    2.75
   2 -11  11   55.95    2.91
   2 -11  12   15.47    1.09
   2 -11  12   17.43    1.06
  -2  10  22    1.94    0.70
  -2  10  21   44.83    2.66
   2 -10 -20   14.87    1.65
   2 -10 -20   17.72    1.70
   2 -10 -19   37.73    2.71
   2 -10 -19   34.90    2.51
   2 -10 -19   42.95    2.32
   2 -10 -19   37.27    2.28
   2 -10 -18    2.19    1.45
   2 -10 -18    0.74    1.49
   2 -10 -18    0.59    1.06
   2 -10 -18    0.03    1.32
   2 -10 -18    0.31    1.60
   2 -10 -17   -0.58    1.95
   2 -10 -17    0.21    1.12
   2 -10 -17    2.22    1.61
   2 -10 -17    0.40    1.52
   2 -10 -16   15.91    2.06
   2 -10 -16   23.12    2.55
  -2  10  16   20.73    2.64
   2 -10 -16   20.76    2.24
   2 -10 -15    0.28    1.57
   2 -10 -15    1.53    1.68
   2 -10 -15    2.43    1.91
  -2  10  15    2.35    2.30
   2 -10 -15    4.24    2.12
   2 -10 -15   -0.15    2.53
   2 -10 -15   -0.69    1.21
  -2  10  15   -0.46    3.74
   2 -10 -14    3.02    1.99
   2 -10 -14    0.31    1.50
   2 -10 -14   -0.14    1.67
   2 -10 -14    3.69    2.17
   2 -10 -14   -1.18    1.94
  -2  10  14    3.47    3.76
   2 -10 -14    0.59    2.44
   2 -10 -14    0.73    1.26
   2 -10 -13   10.33    2.78
   2 -10 -13   11.63    1.54
   2 -10 -13   14.04    1.93
   2 -10 -13   16.77    1.82
   2 -10 -13   17.51    2.18
   2 -10 -13   19.72    2.57
   2 -10 -13   12.39    1.46
  -2  10  13   15.42    4.10
   2 -10 -12  146.09    7.36
   2 -10 -12  156.79    7.70
   2 -10 -12  171.38    9.03
   2 -10 -12  158.93    7.34
   2 -10 -12  128.70    8.64
  -2  10  12  138.24    9.34
   2 -10 -12  159.45    8.75
   2 -10 -12  154.85    7.24
   2 -10 -12  148.05    7.38
  -2  10  11   64.75    5.65
   2 -10 -11   57.57    5.25
   2 -10 -11   68.89    3.81
   2 -10 -11   66.26    5.27
   2 -10 -11   73.17    3.72
   2 -10 -11   64.93    3.86
   2 -10 -11   69.76    3.86
   2 -10 -11   70.10    4.42
   2 -10 -11   74.97    4.08
   2 -10 -11   91.50    5.59
   2 -10 -11   78.43    3.88
   2 -10 -11   79.13    3.84
   2 -10 -11   86.78    5.51
   2 -10 -11   67.96    3.99
   2 -10 -10   24.42    2.00
  -2  10  10   16.97    3.41
   2 -10 -10   23.73    3.57
   2 -10 -10   22.79    1.68
   2 -10 -10   21.76    1.98
   2 -10 -10   18.27    2.04
   2 -10 -10   23.08    2.15
   2 -10 -10   20.95    1.80
   2 -10 -10   26.78    3.21
   2 -10 -10   19.88    1.81
   2 -10 -10   20.25    3.10
   2 -10 -10   22.92    2.20
   2 -10  -9   75.04    5.81
  -2  10   9   61.86    5.28
   2 -10  -9   72.56    4.17
   2 -10  -9   79.52    4.02
   2 -10  -9   77.14    4.25
   2 -10  -9   73.78    4.22
   2 -10  -9   79.25    4.35
   2 -10  -9   88.30    5.65
   2 -10  -9   88.59    4.16
   2 -10  -9   87.74    5.77
   2 -10  -9   91.04    4.21
   2 -10  -9   74.66    4.35
   2 -10  -8   87.41    4.26
   2 -10  -8   79.69    5.93
   2 -10  -8   77.15    4.04
   2 -10  -8   82.78    4.34
   2 -10  -8   81.45    4.26
   2 -10  -8   72.74    5.51
   2 -10  -8   77.66    4.14
   2 -10  -8   68.24    4.09
   2 -10  -8   75.72    5.44
   2 -10  -8   88.10    4.42
   2 -10  -8   95.51    4.52
   2 -10  -7    4.19    1.60
   2 -10  -7    2.53    2.63
   2 -10  -7    4.24    1.38
   2 -10  -7    2.83    1.17
   2 -10  -7    2.27    2.09
   2 -10  -7    2.05    1.15
   2 -10  -7    3.93    1.20
   2 -10  -7    3.03    1.53
   2 -10  -7    2.48    1.28
   2 -10  -7    2.64    2.29
   2 -10  -6  133.94    6.63
   2 -10  -6  153.64    8.10
   2 -10  -6  167.76    8.27
   2 -10  -6  151.28    6.72
   2 -10  -6  137.85    6.86
   2 -10  -6  127.21    6.66
   2 -10  -6  142.86    6.76
   2 -10  -6  143.73    6.93
   2 -10  -6  136.43    6.83
   2 -10  -5    1.38    1.21
   2 -10  -5    0.60    1.14
  -2  10   5    1.34    1.09
   2 -10  -5    0.77    1.66
   2 -10  -5    0.20    0.92
   2 -10  -5    1.25    1.12
   2 -10  -5    1.17    1.94
   2 -10  -5    1.75    2.17
   2 -10  -5    1.39    1.06
   2 -10  -5    0.04    1.35
   2 -10  -5   -1.20    2.97
   2 -10  -5    2.00    2.38
   2 -10  -5    1.45    1.27
   2 -10  -4    5.59    1.31
   2 -10  -4    3.83    1.19
  -2  10   4    3.79    1.16
   2 -10  -4    6.26    1.72
   2 -10  -4    2.76    0.94
   2 -10  -4    0.83    2.15
   2 -10  -4    0.75    2.02
   2 -10  -4    2.54    0.97
   2 -10  -4    3.21    1.36
   2 -10  -4    2.71    2.85
   2 -10  -4    2.67    2.33
   2 -10  -4    1.04    1.25
   2 -10  -3    1.57    1.19
   2 -10  -3    2.97    1.33
  -2  10   3    2.94    1.25
   2 -10  -3    3.05    1.63
   2 -10  -3    2.39    0.95
   2 -10  -3    4.76    2.30
   2 -10  -3    6.46    2.35
   2 -10  -3    1.29    0.95
   2 -10  -3   -1.21    2.77
   2 -10  -3    3.46    2.49
   2 -10  -3    1.69    1.25
   2 -10  -2   54.71    5.21
   2 -10  -2   73.29    3.70
   2 -10  -2   68.14    3.76
  -2  10   2   72.54    3.82
   2 -10  -2   68.29    3.77
   2 -10  -2   66.27    3.59
   2 -10  -2   66.01    3.46
   2 -10  -2   73.63    5.17
   2 -10  -2   70.16    5.00
   2 -10  -2   66.25    3.50
   2 -10  -2   68.69    3.89
   2 -10  -2   64.11    5.10
   2 -10  -2   63.59    3.62
   2 -10  -1  135.28    9.43
   2 -10  -1  169.86    8.01
   2 -10  -1  158.82    8.06
  -2  10   1  161.41    8.14
   2 -10  -1  162.54    7.99
   2 -10  -1  164.54    8.08
   2 -10  -1  154.95    7.79
   2 -10  -1  218.43    9.84
   2 -10  -1  213.71    9.79
   2 -10  -1  165.28    8.00
   2 -10  -1  173.55    7.86
   2 -10  -1  158.33    8.12
   2 -10  -1  193.31    8.02
   2 -10  -1  202.13    9.73
   2 -10   0   43.00    2.81
   2 -10   0   45.77    2.75
  -2  10   0   44.40    2.95
   2 -10   0   39.70    2.70
   2 -10   0   44.21    2.84
   2 -10   0   46.59    4.26
   2 -10   0   39.08    4.39
   2 -10   0   42.86    2.49
   2 -10   0   44.46    2.71
  -2  10   0   37.61    5.33
   2 -10   0   45.19    3.05
   2 -10   0   39.65    4.05
   2 -10   0   46.99    2.68
   2 -10   1  156.17    7.77
   2 -10   1  154.26    7.67
  -2  10  -1  160.24    7.93
   2 -10   1  150.99    7.72
   2 -10   1  164.48    7.74
   2 -10   1  183.69    9.51
   2 -10   1  133.14    9.10
   2 -10   1  163.92    7.69
   2 -10   1  158.10    7.47
   2 -10   1  155.45    7.76
  -2  10  -1  138.78    9.94
   2 -10   1  185.35    9.33
   2 -10   1  169.35    7.61
  -2  10  -2  169.14   11.50
   2 -10   2  192.32    9.28
   2 -10   2  196.01    9.02
   2 -10   2  192.29    9.23
   2 -10   2  200.98    9.24
  -2  10  -2  195.96    9.49
   2 -10   2  186.05    9.28
   2 -10   2  201.20    9.25
   2 -10   2  205.91   10.95
   2 -10   2  166.87   10.66
   2 -10   2  195.16    9.12
   2 -10   2  184.70   10.61
   2 -10   2  206.86   10.72
   2 -10   2  196.83    9.12
   2 -10   3   16.60    1.72
   2 -10   3   19.81    1.91
   2 -10   3   23.42    1.92
   2 -10   3   20.64    2.06
   2 -10   3   20.82    3.45
  -2  10  -3   21.28    2.35
   2 -10   3   19.30    1.94
  -2  10  -3   20.76    4.45
   2 -10   3   21.19    2.09
   2 -10   3   19.08    1.78
   2 -10   3   17.33    3.02
  -2  10  -4   18.38    2.28
   2 -10   4   21.04    2.13
   2 -10   4   20.42    3.62
   2 -10   4   21.33    1.97
  -2  10  -4   26.15    4.30
   2 -10   4   18.10    1.91
   2 -10   5    5.18    1.80
  -2  10  -5    8.10    1.57
  -2  10  -5    7.47    1.89
   2 -10   5    6.48    1.50
  -2  10  -5    5.65    3.31
   2 -10   5    7.10    1.53
   2 -10   6   63.92    3.91
  -2  10  -6   65.61    3.66
  -2  10  -6   66.41    3.89
   2 -10   6   63.48    3.60
   2 -10   6   62.63    3.57
  -2  10  -7   10.69    1.79
  -2  10  -7    7.01    1.38
   2 -10   7    6.89    1.90
   2 -10   7    6.47    1.47
   2 -10   7    6.84    1.54
   2 -10   7    6.75    1.60
  -2  10  -8    3.36    1.48
  -2  10  -8    1.18    1.19
   2 -10   8   -0.41    1.74
   2 -10   8    4.29    1.29
   2 -10   8    1.07    1.31
   2 -10   8    2.67    1.39
   2 -10   9   33.70    2.66
   2 -10   9   30.20    2.19
   2 -10   9   37.09    2.34
  -2  10  -9   36.53    2.27
  -2  10  -9   40.63    2.46
   2 -10  10    7.76    1.07
   2 -10  10    8.47    1.25
  -2  10 -10   11.34    1.32
  -2  10 -10    8.43    1.13
  -2  10 -11   10.70    1.10
   2 -10  11   10.34    1.28
  -2  10 -11    9.76    1.00
   2 -10  12    3.85    0.88
  -2  10 -12    2.71    0.51
   2 -10  12    3.09    1.02
  -2  10 -12    1.66    0.57
   2 -10  13    1.84    0.71
  -2   9  22   20.31    1.38
  -2   9  21    0.95    1.27
   2  -9 -20   14.54    1.24
   2  -9 -20   12.56    1.63
   2  -9 -20   11.17    1.45
  -2   9  20   14.09    1.99
   2  -9 -19    8.05    1.79
   2  -9 -19    8.03    1.56
   2  -9 -19    9.74    1.25
   2  -9 -19   11.22    1.71
   2  -9 -18    0.38    1.04
   2  -9 -18    1.25    1.63
   2  -9 -18    0.22    1.32
   2  -9 -18    1.70    1.54
   2  -9 -17    0.15    1.15
   2  -9 -17    1.90    1.59
   2  -9 -17    0.38    1.65
   2  -9 -17   -0.47    1.84
   2  -9 -16    4.13    2.03
  -2   9  16    2.19    2.19
   2  -9 -16   -0.88    1.22
  -2   9  16   -0.94    3.84
   2  -9 -16   -0.29    1.68
   2  -9 -16    2.65    1.77
   2  -9 -15   18.13    2.39
   2  -9 -15   17.28    2.02
   2  -9 -15   16.77    2.37
   2  -9 -15   14.61    1.98
   2  -9 -15    9.73    1.57
  -2   9  15   11.75    4.40
  -2   9  15   19.00    2.58
   2  -9 -14    5.45    1.56
   2  -9 -14    4.67    1.78
  -2   9  14    4.13    3.91
   2  -9 -14    6.00    2.12
   2  -9 -14    2.74    1.30
   2  -9 -14    1.30    2.37
   2  -9 -14   10.03    2.29
   2  -9 -13    8.98    1.86
   2  -9 -13   11.30    1.76
   2  -9 -13   15.21    2.17
  -2   9  13    6.99    3.82
   2  -9 -13   16.47    1.59
   2  -9 -13   15.52    2.86
   2  -9 -13   14.15    2.45
   2  -9 -12   32.35    2.99
   2  -9 -12   32.87    2.53
   2  -9 -12   35.09    2.43
   2  -9 -12   31.77    2.68
   2  -9 -12   36.41    2.29
   2  -9 -12   33.15    3.57
  -2   9  12   28.46    4.55
   2  -9 -12   29.44    3.47
   2  -9 -12   31.83    2.15
   2  -9 -12   37.14    3.54
   2  -9 -12   36.19    2.38
  -2   9  11  152.02    9.54
   2  -9 -11  140.61    8.93
   2  -9 -11  166.36    7.73
   2  -9 -11  168.17    8.05
   2  -9 -11  162.71    9.03
   2  -9 -11  156.51    7.63
   2  -9 -11  163.67    8.96
   2  -9 -11  162.11    7.58
   2  -9 -11  167.61    8.99
   2  -9 -11  159.59    7.72
   2  -9 -10   85.89    4.64
   2  -9 -10   81.52    5.93
  -2   9  10   83.26    6.15
   2  -9 -10   90.93    4.47
   2  -9 -10   86.61    4.57
   2  -9 -10   90.95    4.64
   2  -9 -10   86.03    4.73
   2  -9 -10   81.62    4.98
   2  -9 -10   96.65    4.59
   2  -9 -10   98.65    6.01
   2  -9 -10  101.86    6.06
   2  -9 -10   99.07    4.57
   2  -9 -10   88.76    4.71
   2  -9  -9   68.28    5.06
  -2   9   9   70.61    4.95
   2  -9  -9   69.93    3.56
   2  -9  -9   59.73    3.32
   2  -9  -9   68.76    3.60
   2  -9  -9   60.67    3.55
   2  -9  -9   60.64    4.70
   2  -9  -9   64.12    3.43
   2  -9  -9   56.17    4.58
   2  -9  -9   58.74    3.41
   2  -9  -9   73.35    3.71
   2  -9  -9   77.47    3.75
   2  -9  -8    6.45    1.56
   2  -9  -8    1.60    1.90
   2  -9  -8    2.93    1.08
   2  -9  -8    4.00    1.17
   2  -9  -8    4.00    1.27
  -2   9   8    6.71    2.38
   2  -9  -8    5.95    2.60
   2  -9  -8    4.07    1.13
   2  -9  -8    5.40    2.22
   2  -9  -8    4.79    1.46
   2  -9  -8    4.40    1.20
   2  -9  -7    2.06    1.46
   2  -9  -7   -0.03    1.02
   2  -9  -7    1.45    1.91
  -2   9   7    2.58    1.90
   2  -9  -7    3.14    2.69
   2  -9  -7   -0.04    1.19
   2  -9  -7    1.86    1.06
   2  -9  -7   -0.93    2.06
   2  -9  -7    0.48    1.12
   2  -9  -7    2.22    1.37
   2  -9  -6    6.28    2.82
   2  -9  -6    6.13    1.35
   2  -9  -6    7.86    1.05
   2  -9  -6    6.82    1.61
   2  -9  -6    9.46    1.30
   2  -9  -6    7.74    1.18
   2  -9  -6   11.59    2.26
   2  -9  -5   70.83    4.76
   2  -9  -5   76.63    4.89
   2  -9  -5   69.38    3.65
   2  -9  -4   10.36    1.69
   2  -9  -4   10.61    2.91
   2  -9  -4   15.62    2.75
   2  -9  -4   13.63    1.45
   2  -9  -4   17.15    2.43
   2  -9  -4   16.11    2.58
   2  -9  -4   16.96    1.41
   2  -9  -3  306.17   15.21
   2  -9  -3  276.79   16.43
   2  -9  -3  342.66   16.46
   2  -9  -3  340.06   15.10
   2  -9  -3  384.02   16.40
   2  -9  -3  380.60   16.49
   2  -9  -2  123.14    7.63
   2  -9  -2  125.63    7.59
   2  -9  -2  147.41    6.69
   2  -9  -2  130.56    7.88
   2  -9  -2  120.73    6.49
   2  -9  -2  136.03    8.16
   2  -9  -1  165.49    7.85
   2  -9  -1  169.89    7.83
   2  -9  -1  169.63    9.01
   2  -9  -1  160.21    8.94
   2  -9  -1  168.27    7.89
   2  -9  -1  156.67    7.69
   2  -9  -1  157.75    9.02
   2  -9  -1  160.68    9.30
   2  -9   0   18.08    1.65
   2  -9   0   18.04    1.73
   2  -9   0   16.50    1.87
   2  -9   0   15.34    1.52
   2  -9   0   15.66    1.34
   2  -9   0   25.80    3.02
   2  -9   0   17.25    1.68
   2  -9   0   17.00    1.60
   2  -9   0   17.73    3.06
   2  -9   0   18.24    2.80
   2  -9   0   17.15    1.53
   2  -9   1    4.48    2.58
   2  -9   1   10.97    1.48
  -2   9  -1   11.82    1.69
   2  -9   1    9.23    1.46
   2  -9   1   11.29    1.53
   2  -9   1   16.34    2.68
   2  -9   1   10.46    1.35
   2  -9   1   10.88    1.19
  -2   9  -1    8.65    4.01
   2  -9   1    7.48    1.60
   2  -9   1   12.44    2.65
   2  -9   1   13.03    1.39
   2  -9   2  110.36    5.34
  -2   9  -2  108.07    5.57
   2  -9   2  103.00    5.27
   2  -9   2  106.84    5.37
   2  -9   2  107.51    6.77
   2  -9   2   97.16    6.72
   2  -9   2  101.66    5.26
   2  -9   2  103.98    5.09
  -2   9  -2  106.11    8.13
   2  -9   2  109.28    5.38
   2  -9   2  111.16    6.61
   2  -9   2  100.72    5.15
   2  -9   3   79.57    4.81
  -2   9  -3   67.78    7.08
   2  -9   3   98.97    4.86
   2  -9   3   95.65    4.61
   2  -9   3   86.40    4.81
  -2   9  -3   89.63    5.11
   2  -9   3   92.10    4.78
   2  -9   3   81.18    4.85
   2  -9   3  117.53    6.79
   2  -9   3   74.08    6.10
   2  -9   3   93.51    6.11
   2  -9   3   97.82    4.71
   2  -9   3  115.71    6.31
   2  -9   3  111.86    4.74
   2  -9   4    9.29    1.62
  -2   9  -4   10.48    2.01
   2  -9   4   11.88    1.77
   2  -9   4   12.55    3.17
   2  -9   4   10.62    1.54
  -2   9  -4   16.07    4.45
   2  -9   4   11.45    2.56
  -2   9  -5   10.72    1.65
  -2   9  -5   10.48    2.00
   2  -9   5   11.61    1.65
  -2   9  -5   13.80    4.12
   2  -9   5    6.87    1.69
  -2   9  -6   -0.55    1.41
  -2   9  -6    1.33    1.77
   2  -9   6    1.31    1.35
  -2   9  -6    2.06    3.16
   2  -9   6   -0.05    1.62
   2  -9   7    3.05    1.75
  -2   9  -7    2.00    1.43
  -2   9  -7    0.58    1.74
   2  -9   7    2.19    1.45
  -2   9  -7   -2.60    3.12
   2  -9   7    2.66    1.51
  -2   9  -8    0.42    1.36
   2  -9   8    2.97    1.76
   2  -9   8    1.56    1.38
   2  -9   8    4.60    1.40
  -2   9  -8    0.87    1.66
  -2   9  -9   53.06    3.13
   2  -9   9   52.23    3.06
   2  -9   9   51.56    3.15
   2  -9   9   54.87    3.19
  -2   9  -9   55.81    3.37
   2  -9  10   16.72    1.68
   2  -9  10   17.73    1.72
  -2   9 -10   16.84    1.66
  -2   9 -10   18.39    1.81
   2  -9  11   16.35    1.79
   2  -9  11   15.80    1.46
   2  -9  11   14.88    1.49
  -2   9 -11   18.30    1.56
   2  -9  12   14.53    1.24
  -2   9 -12   16.19    1.26
   2  -9  12   16.77    1.62
  -2   9 -12   16.49    1.34
  -2   9 -13    2.92    0.62
   2  -9  13    3.65    0.98
  -2   9 -13    2.59    0.63
  -2   8  22    5.19    0.93
   2  -8 -21    5.22    0.86
  -2   8  21    4.36    1.38
   2  -8 -20   24.57    1.67
  -2   8  20   23.47    2.28
   2  -8 -19   15.47    1.84
   2  -8 -19   14.58    1.91
   2  -8 -19   17.90    1.48
   2  -8 -19   15.88    2.02
   2  -8 -18    7.33    1.75
   2  -8 -18    7.10    1.87
   2  -8 -17   61.15    3.87
   2  -8 -17   65.31    3.89
   2  -8 -17   64.80    3.60
   2  -8 -16  236.47   11.37
   2  -8 -16  252.47   11.45
  -2   8  15    1.94    2.32
   2  -8 -15    1.98    1.68
   2  -8 -15    0.88    1.74
   2  -8 -15    4.30    2.11
   2  -8 -14  101.28    5.30
   2  -8 -14  105.25    5.22
   2  -8 -14   97.68    5.12
   2  -8 -14   90.26    5.12
  -2   8  14   95.39    7.69
  -2   8  14   84.44    5.26
   2  -8 -13    5.04    2.16
   2  -8 -13    3.59    1.78
  -2   8  13    2.95    3.69
   2  -8 -13    1.55    1.64
   2  -8 -13    2.09    1.49
   2  -8 -12    9.58    1.64
   2  -8 -12    8.64    1.54
   2  -8 -12   11.51    1.78
   2  -8 -12   13.75    2.26
   2  -8 -12   12.60    2.44
   2  -8 -12    8.64    2.32
  -2   8  12   10.43    3.82
   2  -8 -11  111.69    7.67
  -2   8  11  116.21    8.42
   2  -8 -11  143.67    7.84
   2  -8 -11  134.98    6.71
   2  -8 -11  137.14    6.80
   2  -8 -11  166.00    6.62
   2  -8 -11  183.79    8.13
   2  -8 -11  132.83    6.96
   2  -8 -11  120.10    6.63
   2  -8 -10    2.15    2.18
  -2   8  10    4.12    2.98
   2  -8 -10    1.65    0.92
   2  -8 -10    1.26    1.12
   2  -8 -10    1.04    1.00
   2  -8 -10    0.56    1.90
   2  -8 -10    0.95    1.86
   2  -8 -10    0.09    1.06
   2  -8 -10    3.17    1.21
   2  -8 -10   -1.35    1.89
   2  -8 -10    0.67    1.34
   2  -8 -10    1.75    1.32
   2  -8  -9   61.05    3.47
   2  -8  -9   64.97    4.50
   2  -8  -9   64.96    3.33
   2  -8  -9   61.60    3.49
   2  -8  -9   55.98    4.66
  -2   8   9   66.39    4.90
   2  -8  -9   66.08    3.43
   2  -8  -9   64.11    4.63
   2  -8  -9   61.77    3.35
   2  -8  -9   66.09    3.53
   2  -8  -8  192.16    9.76
   2  -8  -8  191.94    8.57
   2  -8  -8  171.72    8.65
  -2   8   8  166.06    9.61
   2  -8  -8  158.53    9.74
   2  -8  -8  198.42    9.82
   2  -8  -8  193.02    8.55
   2  -8  -7    0.20    1.73
   2  -8  -7    0.33    1.00
   2  -8  -7    1.31    1.33
   2  -8  -7    1.49    2.37
  -2   8   7    3.56    2.06
   2  -8  -7    0.02    1.07
   2  -8  -7    1.94    2.13
   2  -8  -6    1.72    1.01
   2  -8  -6    2.58    1.76
   2  -8  -6    0.20    1.38
   2  -8  -6    1.94    2.67
  -2   8   6    0.81    1.77
   2  -8  -6    0.10    2.03
   2  -8  -6    2.13    1.07
   2  -8  -5    1.12    1.01
   2  -8  -5    1.99    1.77
  -2   8   5    1.03    1.57
   2  -8  -4   51.24    3.75
   2  -8  -4   47.35    2.62
   2  -8  -4   47.56    3.68
   2  -8  -4   47.26    2.87
   2  -8  -4   46.66    4.29
   2  -8  -4   48.64    3.96
   2  -8  -4   47.45    2.68
   2  -8  -3  236.76   11.11
   2  -8  -3  217.49    9.95
   2  -8  -3  230.82   11.13
   2  -8  -3  215.06   10.13
   2  -8  -3  198.33   11.34
   2  -8  -3  226.79   11.24
   2  -8  -3  213.44    9.99
   2  -8  -2    2.51    1.81
   2  -8  -2    1.68    1.87
   2  -8  -2    5.51    1.46
   2  -8  -2    4.79    2.64
   2  -8  -2    1.86    2.15
   2  -8  -2    0.71    1.10
   2  -8  -1  256.21   13.22
   2  -8  -1  257.64   13.23
   2  -8  -1  281.72   12.36
   2  -8  -1  264.34   13.65
   2  -8  -1  274.61   13.39
   2  -8  -1  262.53   12.17
   2  -8   0   20.72    2.82
   2  -8   0   24.88    2.78
   2  -8   0   25.92    2.01
   2  -8   0   24.73    3.31
   2  -8   0   23.12    2.95
   2  -8   0   22.27    1.73
   2  -8   1  182.80    9.78
   2  -8   1  196.57    9.78
   2  -8   1  182.56    8.48
   2  -8   1  188.46    8.66
   2  -8   2   -0.30    1.10
   2  -8   2    1.43    2.18
   2  -8   2    0.33    1.95
   2  -8   2    1.49    1.02
   2  -8   2    0.44    0.99
   2  -8   2    0.25    1.29
  -2   8  -2   -1.47    3.84
   2  -8   2    1.00    2.31
   2  -8   3   25.52    3.35
   2  -8   3   40.84    3.41
   2  -8   3   37.02    2.06
  -2   8  -3   29.25    2.37
   2  -8   3   25.91    2.21
   2  -8   3   41.59    3.69
   2  -8   3   31.42    2.12
   2  -8   3   33.40    1.99
   2  -8   3   35.59    3.38
   2  -8   3   28.37    2.14
  -2   8  -3   24.61    4.91
  -2   8  -4  113.02    8.79
   2  -8   4  134.04    6.36
   2  -8   4  131.48    6.17
   2  -8   4  133.77    7.89
  -2   8  -4  128.05    6.63
   2  -8   4  132.17    6.47
  -2   8  -4  126.17    6.38
   2  -8   4  123.15    7.59
   2  -8   4  124.46    7.35
   2  -8   5    0.43    1.43
   2  -8   5    2.99    2.74
   2  -8   5    1.89    1.23
  -2   8  -5    1.44    1.32
  -2   8  -5    6.06    4.23
  -2   8  -5    2.18    1.63
   2  -8   6  130.46    6.27
  -2   8  -6  120.12    6.23
  -2   8  -6  123.22    6.46
   2  -8   6  123.97    6.16
  -2   8  -6  116.19    8.41
   2  -8   6  122.81    6.31
   2  -8   7    0.77    1.42
  -2   8  -7   -0.59    1.84
  -2   8  -7    0.78    1.42
   2  -8   7   -0.05    1.36
  -2   8  -7    1.49    3.39
   2  -8   7   -0.16    1.63
   2  -8   8   82.01    4.55
  -2   8  -8   81.50    4.51
   2  -8   8   80.72    4.48
  -2   8  -8   94.30    4.78
  -2   8  -8   71.49    6.23
   2  -8   8   82.17    4.38
   2  -8   9    5.27    1.43
  -2   8  -9    4.28    1.43
  -2   8  -9    0.70    1.62
  -2   8  -9    8.40    2.56
   2  -8   9    3.79    1.34
  -2   8 -10    2.50    1.52
   2  -8  10    2.76    1.66
   2  -8  10    2.70    1.41
  -2   8 -10    3.62    1.33
  -2   8 -11    1.45    1.36
   2  -8  11    3.77    1.64
   2  -8  11    3.31    1.31
  -2   8 -11    3.07    1.23
  -2   8 -12   -0.10    1.14
   2  -8  12    0.43    1.15
  -2   8 -12    0.90    0.99
   2  -8  12   -0.54    1.42
  -2   8 -13   25.34    1.67
  -2   8 -13   24.74    1.63
   2  -8  13   22.84    1.65
   2  -8  13   25.71    1.88
  -2   8 -14    3.09    0.66
  -2   8 -14    3.00    0.71
   2  -8  15    0.07    0.59
   2  -8  15    0.25    0.53
  -2   7  22   -0.10    0.88
   2  -7 -21   -0.18    1.23
  -2   7  21    0.29    1.33
   2  -7 -21    2.19    0.79
   2  -7 -20   21.90    2.03
   2  -7 -20   17.56    1.77
  -2   7  20   21.21    2.26
   2  -7 -19   -1.53    1.53
   2  -7 -18    0.26    1.75
   2  -7 -18    1.14    1.68
   2  -7 -17   92.94    5.09
   2  -7 -16    0.99    1.76
   2  -7 -16    0.45    1.76
  -2   7  16    2.93    3.96
   2  -7 -15  219.50   10.53
  -2   7  15  211.46   12.92
   2  -7 -15  225.53   10.49
   2  -7 -15  214.55   10.45
   2  -7 -14   17.00    2.24
   2  -7 -14   20.55    2.40
  -2   7  14   17.31    4.49
   2  -7 -14   18.88    2.01
   2  -7 -14   16.09    2.03
   2  -7 -13  117.35    6.00
   2  -7 -13  117.56    6.05
  -2   7  13   99.99    8.01
   2  -7 -13  119.82    5.90
   2  -7 -13  114.08    5.89
  -2   7  12   10.41    3.82
   2  -7 -12   13.82    2.16
   2  -7 -12    9.88    1.81
   2  -7 -12   11.53    1.61
   2  -7 -12   10.80    1.67
   2  -7 -11   21.11    1.79
   2  -7 -11   22.36    1.96
   2  -7 -11   23.53    1.89
   2  -7 -11   24.98    2.14
  -2   7  11   23.00    3.94
   2  -7 -11   22.43    2.75
   2  -7 -11   24.27    2.72
   2  -7 -11   27.69    2.43
   2  -7 -11   31.64    1.74
   2  -7 -10   96.81    4.80
   2  -7 -10   95.50    4.97
   2  -7 -10   93.56    5.67
   2  -7 -10   92.92    4.80
  -2   7  10   85.94    6.38
   2  -7 -10   85.16    5.69
   2  -7 -10  102.76    5.72
   2  -7 -10   96.34    4.56
   2  -7 -10   90.56    4.67
  -2   7   9    0.35    2.55
   2  -7  -9    1.87    2.25
   2  -7  -9    1.06    1.15
   2  -7  -9    1.04    1.00
   2  -7  -9    1.10    1.89
   2  -7  -8    0.92    0.97
   2  -7  -8    1.53    2.37
  -2   7   8    2.59    2.40
   2  -7  -8    2.82    1.18
   2  -7  -8    1.81    2.08
   2  -7  -8    1.62    1.05
   2  -7  -7  246.27   11.82
   2  -7  -7  233.97   10.81
   2  -7  -7  222.72   11.98
  -2   7   7  228.31   11.76
   2  -7  -7  234.03   10.92
   2  -7  -7  257.15   11.97
   2  -7  -7  241.24   10.81
   2  -7  -6   11.62    2.06
   2  -7  -6   11.15    1.21
   2  -7  -6    8.40    2.67
  -2   7   6   11.50    2.26
   2  -7  -6   10.06    1.50
   2  -7  -6   12.65    2.54
   2  -7  -6   12.52    1.35
   2  -7  -5    0.08    1.72
   2  -7  -5   -0.04    1.09
  -2   7   5    3.01    1.81
   2  -7  -5    5.42    1.42
   2  -7  -5    0.56    1.10
  -2   7   4   41.60    2.99
   2  -7  -4   52.85    3.52
   2  -7  -4   44.57    2.52
   2  -7  -4   45.79    3.78
   2  -7  -3  197.72    9.92
   2  -7  -3  189.70    9.93
   2  -7  -3  182.37    9.02
   2  -7  -3  203.54   10.56
   2  -7  -3  208.83    9.24
   2  -7  -3  207.23   10.27
   2  -7  -3  205.84    9.08
   2  -7  -2    1.17    1.83
   2  -7  -2    1.12    1.00
   2  -7  -2   -1.63    1.97
   2  -7  -2    1.32    2.74
   2  -7  -2    1.31    1.46
   2  -7  -2   -0.73    1.13
   2  -7  -2   -0.90    2.27
   2  -7  -1  233.58   10.82
   2  -7  -1  232.41   10.81
   2  -7  -1  182.10   10.92
   2  -7  -1  196.82    9.87
   2  -7  -1  235.22   10.96
   2  -7  -1  219.13    9.77
   2  -7   0    9.00    2.24
   2  -7   0   10.22    2.28
   2  -7   0   12.91    2.98
   2  -7   0   15.16    1.64
   2  -7   0    8.47    2.43
   2  -7   0   10.83    1.32
   2  -7   1    8.10    2.36
   2  -7   1   12.10    2.84
   2  -7   1   15.87    1.63
   2  -7   1   10.37    2.38
   2  -7   1   10.03    1.24
   2  -7   2  168.62    9.38
   2  -7   2  182.67    9.57
  -2   7  -2  184.29   10.74
   2  -7   2  195.21    8.42
   2  -7   2  175.69    9.31
   2  -7   2  169.45    8.23
   2  -7   3  105.54    6.42
   2  -7   3  112.33    6.62
   2  -7   3   99.01    6.49
  -2   7  -3  119.28    7.99
   2  -7   3  128.45    5.44
   2  -7   3  100.94    5.21
   2  -7   3  104.85    6.28
   2  -7   4  124.47    6.84
   2  -7   4  120.99    6.85
   2  -7   4  121.82    5.96
   2  -7   4  117.92    5.91
   2  -7   4  130.59    7.27
   2  -7   4  121.83    5.88
   2  -7   4  111.37    6.97
  -2   7  -4  109.81    8.20
  -2   7  -5   44.24    3.07
   2  -7   5   43.87    2.87
   2  -7   5   46.46    2.82
  -2   7  -5   44.32    2.83
   2  -7   5   57.28    4.48
   2  -7   5   48.31    2.77
   2  -7   5   44.94    2.60
  -2   7  -5   48.24    5.40
   2  -7   5   52.22    3.69
   2  -7   6    2.43    1.42
   2  -7   6    1.20    1.23
  -2   7  -6    5.64    3.94
   2  -7   6    1.37    1.21
  -2   7  -6    2.24    1.32
   2  -7   6    3.00    0.88
  -2   7  -6    1.70    1.56
   2  -7   7   30.07    2.25
  -2   7  -7   31.20    2.32
  -2   7  -7   33.30    4.58
   2  -7   7   28.26    2.23
   2  -7   7   28.91    1.83
  -2   7  -7   31.42    2.55
   2  -7   8    0.38    1.48
  -2   7  -8   -0.18    3.22
   2  -7   8    2.16    1.39
  -2   7  -8    1.62    1.40
   2  -7   8    2.69    1.01
  -2   7  -8    3.29    1.76
  -2   7  -9  142.86    6.82
   2  -7   9  136.08    6.77
   2  -7   9  135.88    6.61
  -2   7  -9  141.69    6.67
  -2   7  -9  115.38    8.19
   2  -7   9  137.79    6.60
   2  -7   9  122.93    6.23
   2  -7   9  125.49    6.45
   2  -7  10    8.33    1.88
   2  -7  10    5.85    1.59
   2  -7  10    8.95    1.57
  -2   7 -10    8.53    1.57
  -2   7 -10    8.07    1.79
   2  -7  10   10.08    1.19
   2  -7  11   51.05    3.12
  -2   7 -11   50.48    3.08
  -2   7 -11   49.77    3.15
   2  -7  11   47.78    3.27
   2  -7  11   51.69    3.10
  -2   7 -12   34.37    2.29
  -2   7 -12   29.94    2.33
   2  -7  12   31.08    2.47
   2  -7  12   33.39    2.30
  -2   7 -13   12.16    1.41
  -2   7 -13   13.51    1.48
   2  -7  13   12.32    1.62
   2  -7  13   10.90    1.41
  -2   7 -14   30.41    1.85
  -2   7 -14   28.53    1.86
   2  -7  15    0.37    0.68
  -2   7 -15    0.18    0.66
  -2   7 -15    0.86    0.66
  -2   6  22   11.39    1.13
  -2   6  21    4.19    1.42
   2  -6 -21    5.76    0.88
   2  -6 -21    4.99    1.35
   2  -6 -20    2.76    1.28
  -2   6  20    2.34    1.80
   2  -6 -20    2.93    1.56
   2  -6 -19   11.94    1.84
  -2   6  19   14.61    2.40
   2  -6 -19   14.20    2.04
   2  -6 -18    8.76    2.02
   2  -6 -18    7.54    1.85
   2  -6 -18    7.77    1.78
   2  -6 -17   90.16    5.02
   2  -6 -17   92.03    5.00
   2  -6 -17   91.85    5.03
   2  -6 -16  155.60    7.77
   2  -6 -15   61.80    3.87
  -2   6  15   63.61    6.27
  -2   6  14    3.56    3.89
   2  -6 -14    2.22    1.67
   2  -6 -14    4.81    1.88
  -2   6  13   46.24    5.20
   2  -6 -13   50.01    3.14
   2  -6 -13   47.00    3.18
   2  -6 -13   48.98    3.30
  -2   6  12   55.38    5.38
   2  -6 -12   55.75    3.40
   2  -6 -12   62.77    3.58
   2  -6 -12   59.67    3.49
   2  -6 -11   26.60    2.25
   2  -6 -11   31.99    2.66
   2  -6 -11   23.45    2.07
  -2   6  11   23.42    3.84
   2  -6 -10   42.44    3.36
   2  -6 -10   52.48    2.62
   2  -6 -10   41.24    2.44
   2  -6 -10   44.80    3.42
  -2   6  10   51.66    4.58
   2  -6 -10   53.28    3.71
   2  -6  -9  209.98   11.10
   2  -6  -9  221.69   11.26
  -2   6   9  224.64   11.71
   2  -6  -9  213.51   10.18
   2  -6  -9  232.82   11.14
   2  -6  -9  242.97   10.32
   2  -6  -8   19.18    2.83
  -2   6   8   23.88    3.27
   2  -6  -8   17.42    2.41
   2  -6  -8   16.44    1.42
   2  -6  -8   26.09    1.68
  -2   6   7   18.73    2.80
   2  -6  -7   17.78    2.80
   2  -6  -7   21.97    1.65
   2  -6  -7    8.56    2.34
   2  -6  -7   11.74    1.31
   2  -6  -6   -0.99    1.65
   2  -6  -6   -0.68    2.58
  -2   6   6    3.30    2.23
   2  -6  -6    0.30    1.32
   2  -6  -6    1.82    1.11
   2  -6  -6    0.76    2.16
   2  -6  -5  138.81    7.17
  -2   6   5  131.33    7.00
   2  -6  -5  130.43    7.48
   2  -6  -5  135.95    6.45
   2  -6  -5  141.14    7.35
   2  -6  -5  134.55    6.31
  -2   6   4  650.84   28.75
   2  -6  -4  618.69   29.02
   2  -6  -3    5.13    1.87
  -2   6   3    5.32    1.55
   2  -6  -3    4.96    2.97
   2  -6  -3    1.95    1.38
   2  -6  -3    2.07    1.22
   2  -6  -3    0.70    2.23
   2  -6  -2  241.90   12.32
   2  -6  -2  238.99   12.28
  -2   6   2  258.87   11.70
   2  -6  -2  269.71   12.92
   2  -6  -2  285.08   11.78
   2  -6  -2  253.94   12.56
   2  -6  -2  243.82   11.59
   2  -6  -1   10.42    2.33
   2  -6  -1   12.55    2.18
   2  -6  -1   11.40    3.07
   2  -6  -1    9.12    1.52
   2  -6  -1   13.92    2.57
   2  -6  -1   11.21    1.33
   2  -6   0   62.89    4.29
   2  -6   0   70.65    4.28
   2  -6   0   62.21    4.76
   2  -6   0   68.58    3.46
   2  -6   0   67.63    4.53
   2  -6   0   57.70    3.26
   2  -6   1   60.30    3.95
   2  -6   1   52.84    2.96
   2  -6   1   58.57    4.03
   2  -6   1   52.04    2.81
   2  -6   2  758.53   32.17
   2  -6   2  636.02   32.06
   2  -6   2  676.01   31.13
   2  -6   2  712.43   31.04
   2  -6   2  726.82   32.03
   2  -6   3   92.80    5.52
   2  -6   3   79.53    5.41
   2  -6   3   88.22    4.37
  -2   6  -3   83.36    6.83
   2  -6   3   86.18    4.23
   2  -6   3   89.04    5.29
   2  -6   4   34.44    3.09
   2  -6   4   41.13    3.48
   2  -6   4   35.61    3.35
  -2   6  -4   33.01    4.76
   2  -6   4   34.99    1.88
   2  -6   4   39.23    3.16
   2  -6   5   23.35    1.50
   2  -6   5   22.83    2.48
   2  -6   5   28.38    1.92
   2  -6   5   31.69    3.27
   2  -6   5   21.34    2.70
  -2   6  -5   25.97    4.61
   2  -6   6   50.40    2.88
   2  -6   6   45.63    2.54
   2  -6   6   49.59    2.70
   2  -6   6   51.06    2.91
  -2   6  -6   49.37    5.46
  -2   6  -6   50.48    3.13
   2  -6   7   13.84    1.62
   2  -6   7   13.39    1.28
   2  -6   7   15.37    1.63
  -2   6  -7   18.73    4.13
  -2   6  -7   17.62    1.97
   2  -6   8   40.06    2.74
   2  -6   8   37.93    2.61
   2  -6   8   35.59    2.28
   2  -6   8   39.79    2.63
  -2   6  -8   45.76    2.96
  -2   6  -9   10.18    1.88
   2  -6   9    9.57    1.74
   2  -6   9    7.73    1.53
   2  -6   9    5.77    1.24
   2  -6   9    6.44    1.57
   2  -6   9    6.54    1.37
  -2   6 -10   10.05    1.81
   2  -6  10    8.33    1.80
   2  -6  10    8.81    1.58
   2  -6  10   16.03    1.47
  -2   6 -10   11.25    1.70
   2  -6  10    9.27    1.70
  -2   6 -10    9.51    2.96
   2  -6  10   12.57    1.46
   2  -6  11    5.99    1.79
   2  -6  11    4.99    1.51
   2  -6  11   10.18    1.31
   2  -6  11    5.73    1.57
  -2   6 -11    7.61    1.50
  -2   6 -11    3.22    2.51
  -2   6 -11    7.29    1.65
   2  -6  12    1.14    1.52
   2  -6  12   -1.74    1.30
   2  -6  12    1.43    1.40
   2  -6  12   -0.46    1.13
  -2   6 -12    1.04    1.46
   2  -6  12   -0.66    1.39
  -2   6 -12    0.99    1.26
   2  -6  13  151.39    7.36
   2  -6  13  133.22    7.20
   2  -6  13  154.49    7.26
  -2   6 -13  155.01    7.29
   2  -6  13  156.87    7.29
  -2   6 -13  154.78    7.34
   2  -6  14    2.13    1.10
  -2   6 -14    3.99    1.20
  -2   6 -14    3.30    1.18
   2  -6  14    3.54    1.19
  -2   6 -15    0.88    0.95
  -2   6 -15    0.34    0.90
  -2   6 -16    6.84    0.72
   2  -6  16    4.68    0.83
  -2   6 -16    5.90    0.79
  -2   5  22    2.65    0.80
   2  -5 -21    7.79    1.33
  -2   5  21    7.13    1.37
   2  -5 -20   72.30    3.97
  -2   5  20   68.17    4.11
   2  -5 -20   73.27    3.86
   2  -5 -19    1.88    1.75
  -2   5  19    3.12    2.12
   2  -5 -19    1.64    1.56
   2  -5 -18    0.44    1.83
   2  -5 -18   -1.14    1.75
  -2   5  18    2.85    2.31
  -2   5  17    2.07    1.44
   2  -5 -17    1.12    1.87
   2  -5 -17    0.44    1.71
   2  -5 -17    0.30    1.74
  -2   5  17   -0.20    3.39
  -2   5  16  158.16    7.26
   2  -5 -16  145.80    7.47
   2  -5 -16  146.62    7.51
   2  -5 -15    4.63    1.88
   2  -5 -15    3.77    1.69
  -2   5  15    1.65    1.42
  -2   5  14  369.41   19.38
  -2   5  14  363.15   17.03
   2  -5 -14  396.00   17.29
  -2   5  13  201.75   11.71
  -2   5  13  201.87    9.42
   2  -5 -13  205.02    9.64
   2  -5 -13  203.37    9.70
   2  -5 -12    4.35    1.71
  -2   5  12    1.57    3.29
   2  -5 -12    0.04    1.34
   2  -5 -12    0.08    1.45
  -2   5  11   39.15    4.38
   2  -5 -11   39.13    2.56
  -2   5  10  293.52   16.19
   2  -5 -10  351.07   15.40
   2  -5 -10  318.63   15.35
   2  -5  -9  193.84    8.86
  -2   5   9  191.80   10.31
   2  -5  -9  196.87    9.75
   2  -5  -9  201.35    9.62
   2  -5  -9  187.30    8.76
   2  -5  -9  204.36    9.69
   2  -5  -8  273.13   11.14
  -2   5   8  233.15   12.30
   2  -5  -8  259.48   12.03
   2  -5  -8  226.35   10.99
   2  -5  -8  240.59   11.79
   2  -5  -8  237.02   11.85
   2  -5  -7   17.19    2.45
   2  -5  -7   15.75    1.34
   2  -5  -7   11.32    2.56
  -2   5   7   16.14    2.99
   2  -5  -6  327.89   16.81
  -2   5   6  327.28   16.70
   2  -5  -5  122.29    6.56
   2  -5  -5  116.83    6.28
   2  -5  -5  117.03    6.68
  -2   5   5  124.62    6.40
   2  -5  -4  229.25   11.19
  -2   5   4  239.35   11.09
   2  -5  -3  590.28   28.55
   2  -5  -3  581.87   28.38
   2  -5  -3  662.54   28.85
  -2   5   3  668.22   28.18
   2  -5  -2    6.66    2.15
   2  -5  -2    2.74    1.63
   2  -5  -2    8.09    1.75
   2  -5  -2    7.23    2.37
  -2   5   2    6.64    1.16
   2  -5  -1  437.64   19.61
   2  -5  -1  415.79   19.38
   2  -5  -1  426.04   19.42
  -2   5   1  411.24   18.74
   2  -5  -1  468.56   19.87
   2  -5   0  225.09   10.69
   2  -5   0  221.80   10.53
   2  -5   0  207.01   10.51
   2  -5   0  210.88   10.86
   2  -5   1  212.78   10.79
   2  -5   1  209.09   10.71
   2  -5   1  200.76   10.73
   2  -5   2    3.52    2.22
   2  -5   2    7.40    2.51
   2  -5   2    2.43    2.16
   2  -5   3  479.81   21.79
   2  -5   3  486.78   21.61
   2  -5   3  444.33   20.72
   2  -5   3  466.94   21.79
  -2   5  -3  492.70   22.99
   2  -5   3  479.03   20.84
  -2   5  -4  241.08   12.33
   2  -5   4  218.09   10.99
   2  -5   4  236.65   10.73
   2  -5   4  248.87   10.93
   2  -5   4  201.13    9.58
   2  -5   4  226.80   10.64
  -2   5  -5   32.07    4.98
   2  -5   5   35.74    3.40
   2  -5   5   36.95    2.90
   2  -5   5   31.42    1.85
   2  -5   5   39.22    2.99
   2  -5   5   34.72    3.08
  -2   5  -6   78.13    6.36
   2  -5   6   71.21    3.54
   2  -5   6   75.26    4.32
   2  -5   7  540.33   24.37
  -2   5  -7  601.89   26.62
   2  -5   7  545.47   24.37
   2  -5   7  520.82   24.12
  -2   5  -7  569.77   24.56
  -2   5  -8    0.25    1.56
   2  -5   8    2.25    1.32
   2  -5   8    1.29    1.19
  -2   5  -8   -0.86    3.33
   2  -5   8    0.85    1.25
   2  -5   8    1.49    1.01
   2  -5   8    0.57    1.02
  -2   5  -9   52.29    3.30
   2  -5   9   52.16    3.16
   2  -5   9   48.39    3.05
   2  -5   9   50.49    2.81
   2  -5   9   44.95    3.07
  -2   5  -9   51.31    5.28
   2  -5   9   52.02    2.89
   2  -5  10   11.83    1.82
   2  -5  10   11.94    1.68
   2  -5  10   10.91    1.45
   2  -5  10   11.27    1.78
  -2   5 -10   12.07    1.88
  -2   5 -10   13.72    3.28
   2  -5  11   39.34    2.87
   2  -5  11   40.94    2.70
   2  -5  11   40.22    2.52
   2  -5  11   39.43    2.82
  -2   5 -11   43.91    2.94
  -2   5 -11   36.22    4.09
   2  -5  12   25.63    2.27
   2  -5  12   28.97    2.15
   2  -5  12   24.90    1.98
   2  -5  12   23.65    2.27
  -2   5 -12   31.12    2.38
  -2   5 -12   22.45    3.44
   2  -5  13    6.66    1.60
   2  -5  13    3.02    1.36
   2  -5  13    1.62    1.19
  -2   5 -13    5.23    1.55
   2  -5  13    3.84    1.50
  -2   5 -13    3.77    1.37
   2  -5  14   48.92    2.97
   2  -5  14   49.34    2.88
  -2   5 -14   54.02    2.97
   2  -5  14   43.97    2.99
   2  -5  14   50.06    2.78
  -2   5 -14   49.15    2.96
   2  -5  14   48.63    2.97
   2  -5  15    9.44    1.44
  -2   5 -15   11.89    1.36
  -2   5 -15   13.64    1.44
   2  -5  15   13.83    1.40
  -2   5 -16   21.95    1.53
   2  -5  16   17.22    1.51
  -2   5 -17    2.12    0.66
  -2   5 -17    1.80    0.60
  -2   4  22    7.51    0.88
   2  -4 -21    0.82    1.01
  -2   4  21   -2.33    1.27
   2  -4 -21   -0.72    1.15
   2  -4 -20    3.66    1.32
   2  -4 -20    1.87    1.45
  -2   4  20    0.79    1.63
  -2   4  19   25.07    1.95
   2  -4 -19   28.51    2.43
  -2   4  19   23.97    2.71
  -2   4  18    1.88    1.37
   2  -4 -18   -1.76    1.74
   2  -4 -18   -0.05    1.80
  -2   4  18    3.12    2.41
  -2   4  17   10.35    1.71
  -2   4  17   12.18    2.71
   2  -4 -17   11.23    2.11
   2  -4 -17    7.42    1.89
   2  -4 -16    1.64    1.93
  -2   4  16    2.94    3.44
   2  -4 -16    4.11    1.88
  -2   4  16    2.98    1.54
   2  -4 -15  280.33   12.97
  -2   4  15  273.18   15.04
   2  -4 -15  276.69   12.91
  -2   4  15  271.00   12.73
   2  -4 -14   12.76    1.91
  -2   4  14   16.48    1.76
   2  -4 -13  174.58    8.25
  -2   4  13  168.20    8.06
   2  -4 -12   90.20    4.46
  -2   4  12   92.81    6.41
  -2   4  12   75.67    4.15
   2  -4 -12   87.04    4.41
  -2   4  11   26.95    3.95
  -2   4  11   27.96    1.81
  -2   4  10  176.93   10.23
   2  -4 -10  207.76    9.16
  -2   4  10  183.46    8.60
   2  -4  -9   14.75    1.94
   2  -4  -9   12.48    1.85
  -2   4   8  139.43    8.35
   2  -4  -8  141.18    7.80
   2  -4  -8  153.36    7.79
  -2   4   7  107.09    6.78
   2  -4  -7  111.14    6.46
   2  -4  -7  121.07    6.43
   2  -4  -6    2.31    1.77
  -2   4   6    1.44    2.23
   2  -4  -6   -0.45    2.24
   2  -4  -5  242.90   11.74
  -2   4   5  222.01   11.58
   2  -4  -4   74.17    3.71
   2  -4  -4   70.78    3.98
   2  -4  -4   56.67    4.05
  -2   4   4   55.17    3.69
   2  -4  -3  112.82    6.39
  -2   4   3  150.34    6.45
  -2   4   2 3241.53  135.82
   2  -4  -2 3238.15  136.41
   2  -4  -2 2818.26  136.01
   2  -4  -2 2988.06  136.23
  -2   4   1    4.18    0.75
   2  -4  -1    1.98    1.84
   2  -4  -1    3.51    1.42
   2  -4  -1    4.42    1.39
   2  -4  -1    4.07    1.62
   2  -4   0  893.22   37.58
   2  -4   0  914.15   37.59
   2  -4   0  845.82   37.67
   2  -4   1   28.75    2.89
   2  -4   1   28.80    2.58
   2  -4   1   30.07    2.56
   2  -4   1   31.59    2.70
   2  -4   2 2196.80  102.19
   2  -4   2 2366.32  102.18
   2  -4   2 2339.68  102.11
   2  -4   3   27.11    3.18
   2  -4   3   35.20    3.28
   2  -4   3   37.36    3.15
   2  -4   4   50.14    3.97
   2  -4   4   55.35    3.83
   2  -4   4   59.26    4.00
   2  -4   4   53.37    3.84
   2  -4   5  178.44    8.25
   2  -4   5  169.56    8.16
   2  -4   5  154.37    7.30
  -2   4  -5  159.74    9.93
   2  -4   5  163.24    8.69
  -2   4  -6   86.76    6.40
   2  -4   6   83.67    4.50
   2  -4   6   76.87    3.81
   2  -4   7   35.35    2.06
  -2   4  -7   41.29    4.76
   2  -4   8  200.19    9.29
  -2   4  -8  190.25   11.16
   2  -4   8  197.21    9.32
   2  -4   8  182.45    9.20
   2  -4   8  207.10    9.11
  -2   4  -8  204.09    9.45
  -2   4  -9    6.48    1.67
   2  -4   9    7.84    1.44
   2  -4   9    9.61    1.40
  -2   4  -9    6.99    3.38
   2  -4   9    9.10    1.54
   2  -4   9    8.90    1.40
   2  -4   9   11.04    1.34
   2  -4  10   48.58    3.20
   2  -4  10   54.56    3.15
  -2   4 -10   54.38    4.99
   2  -4  10   49.82    3.27
   2  -4  10   51.18    3.02
  -2   4 -10   56.57    3.36
   2  -4  10   55.73    3.00
   2  -4  11  193.82    9.38
   2  -4  11  197.33    9.34
  -2   4 -11  187.53   11.12
   2  -4  11  197.22    9.41
  -2   4 -11  204.42    9.49
   2  -4  11  190.09    9.14
   2  -4  12    1.51    1.46
   2  -4  12    1.99    1.45
  -2   4 -12    0.17    2.46
   2  -4  12    1.36    1.54
  -2   4 -12   -0.86    1.71
   2  -4  12    1.76    1.35
   2  -4  13    3.25    1.54
   2  -4  13    2.19    1.34
  -2   4 -13    3.41    2.44
   2  -4  13    0.66    1.48
  -2   4 -13   -0.58    1.66
   2  -4  13    3.11    1.36
   2  -4  14   31.67    2.36
   2  -4  14   31.90    2.28
  -2   4 -14   32.96    2.45
   2  -4  14   35.02    2.27
   2  -4  14   33.24    2.49
  -2   4 -15  180.01    8.31
   2  -4  15  172.81    8.33
  -2   4 -15  160.24    8.28
   2  -4  15  183.93    8.20
  -2   4 -16   30.41    1.97
   2  -4  16   28.40    2.11
  -2   4 -16   31.32    2.02
   2  -4  16   29.62    1.87
   2  -4  16   28.10    2.01
  -2   4 -17    3.16    0.88
   2  -4  17    2.31    0.99
  -2   4 -17    2.81    0.85
  -2   4 -18    3.05    0.61
  -2   3  22   20.49    1.25
   2  -3 -21    0.24    0.93
  -2   3  21    1.86    1.07
   2  -3 -21    1.33    0.98
  -2   3  20    2.66    1.00
   2  -3 -20    4.16    1.40
   2  -3 -20    4.65    1.32
  -2   3  20    2.74    1.60
  -2   3  19    3.02    1.24
   2  -3 -19    1.92    1.55
   2  -3 -19    3.60    1.09
  -2   3  19   -0.15    1.88
   2  -3 -19    3.43    1.52
   2  -3 -18    9.61    1.85
   2  -3 -18    7.47    1.85
  -2   3  18    5.64    2.24
  -2   3  18    4.72    1.46
   2  -3 -17  101.96    5.49
  -2   3  17   91.39    5.93
  -2   3  17  102.47    5.20
   2  -3 -17  101.65    5.41
   2  -3 -16   55.02    3.63
   2  -3 -16   55.40    3.65
  -2   3  16   62.05    3.46
  -2   3  16   55.75    4.29
  -2   3  16   56.96    5.52
  -2   3  15    6.53    1.64
   2  -3 -15    8.72    1.89
   2  -3 -15    8.38    2.05
  -2   3  15   11.21    3.70
   2  -3 -14  407.76   18.35
  -2   3  14  392.79   18.16
  -2   3  14  404.82   20.27
   2  -3 -13  209.81    9.91
  -2   3  13  208.25    9.75
  -2   3  13  211.11   11.74
   2  -3 -12  101.14    5.13
  -2   3  12  100.32    4.96
  -2   3  11    8.38    1.19
  -2   3  10   18.53    1.48
  -2   3  10   20.15    3.41
   2  -3  -9  433.40   19.87
   2  -3  -9  469.43   20.79
  -2   3   9  414.53   19.46
   2  -3  -9  479.93   19.90
  -2   3   9  460.64   20.93
   2  -3  -8  123.34    6.48
   2  -3  -8  118.28    6.47
  -2   3   8  147.08    7.58
   2  -3  -8  145.59    7.24
   2  -3  -7   72.22    4.31
  -2   3   7   74.55    5.11
   2  -3  -7   65.78    4.26
   2  -3  -6   28.86    2.31
  -2   3   6   22.45    2.69
  -2   3   5   16.49    2.27
   2  -3  -5   17.47    2.10
   2  -3  -5   22.75    2.08
   2  -3  -4    3.42    1.74
  -2   3   4    2.92    1.62
   2  -3  -4    2.45    1.47
  -2   3   3    4.99    1.43
   2  -3  -3    8.50    1.27
   2  -3  -2  658.32   28.86
  -2   3   2  665.00   28.43
   2  -3  -2  604.22   28.44
   2  -3  -2  622.98   28.68
   2  -3  -1 3320.39  135.31
  -2   3   1 3379.80  134.77
   2  -3  -1 2774.62  135.10
   2  -3  -1 2874.70  134.89
   2  -3  -1 2845.83  134.91
   2  -3   0    4.55    1.60
   2  -3   0    6.35    1.29
   2  -3   0    6.53    1.41
   2  -3   0   -0.39    1.81
  -2   3   0    0.72    0.49
   2  -3   1   87.47    4.82
   2  -3   1   84.76    4.69
   2  -3   1   99.33    5.10
   2  -3   2  431.13   19.74
   2  -3   2  428.05   19.76
   2  -3   2  418.23   19.68
   2  -3   2  445.11   19.88
   2  -3   3   82.42    4.94
   2  -3   3   87.85    4.87
   2  -3   3   78.50    4.82
   2  -3   4 1097.04   49.90
   2  -3   4 1135.71   49.64
   2  -3   4 1091.11   49.58
   2  -3   4 1111.02   49.74
   2  -3   5  156.71    8.06
   2  -3   5  167.40    8.13
   2  -3   6    2.59    0.93
   2  -3   6    4.01    1.58
   2  -3   7   32.37    1.93
   2  -3   8  156.36    7.27
  -2   3  -9   -2.16    3.01
   2  -3   9    1.67    1.26
  -2   3  -9    2.09    1.34
   2  -3   9    1.13    1.08
   2  -3  10   -0.04    1.25
   2  -3  10    1.20    1.23
  -2   3 -10    2.28    2.84
   2  -3  10    1.18    1.43
  -2   3 -10    0.88    1.44
   2  -3  10   -0.03    1.19
   2  -3  11   20.69    1.95
   2  -3  11   22.56    1.95
  -2   3 -11   25.26    3.77
   2  -3  11   21.06    2.13
   2  -3  11   19.99    1.86
  -2   3 -11   22.36    2.22
  -2   3 -12    1.84    1.66
   2  -3  12    0.37    1.36
   2  -3  12    2.67    1.38
  -2   3 -12    4.36    2.76
   2  -3  12    3.16    1.63
   2  -3  12    2.34    1.31
   2  -3  12    0.71    1.39
   2  -3  13   97.34    4.97
   2  -3  13   95.24    4.92
  -2   3 -13   94.12    6.64
   2  -3  13   96.11    5.12
  -2   3 -13   94.48    5.10
   2  -3  13   89.46    4.82
   2  -3  14   16.31    1.71
   2  -3  14   17.44    1.75
  -2   3 -14   15.55    2.06
   2  -3  14   18.92    1.79
   2  -3  14   16.97    1.99
  -2   3 -15   11.14    1.73
   2  -3  15    6.61    1.38
   2  -3  15   11.73    1.65
  -2   3 -16   50.33    2.90
   2  -3  16   43.95    2.87
  -2   3 -16   48.43    2.90
   2  -3  16   52.46    2.81
  -2   3 -17    9.10    1.23
  -2   3 -17    9.30    1.22
   2  -3  17    9.82    1.16
   2  -3  17    8.56    1.44
   2  -3  18    7.08    1.08
  -2   3 -18   10.10    0.99
  -2   3 -18    8.29    0.98
  -2   3 -19    4.24    0.53
   2  -2 -21   21.81    1.54
  -2   2  21   26.03    1.68
  -2   2  20   66.41    3.21
   2  -2 -20   58.43    3.35
   2  -2 -20   62.25    3.38
  -2   2  20   60.35    3.48
  -2   2  19   51.88    2.80
   2  -2 -19   48.66    3.02
   2  -2 -19   46.72    2.99
  -2   2  19   42.25    3.22
  -2   2  18   45.94    3.53
   2  -2 -18   46.69    3.17
  -2   2  18   50.58    2.97
   2  -2 -18   44.45    3.19
   2  -2 -18   52.00    2.78
  -2   2  17    3.02    1.57
  -2   2  17    3.17    2.36
   2  -2 -17    2.07    1.71
   2  -2 -17    3.44    1.84
   2  -2 -16    8.74    1.88
  -2   2  16    7.32    3.28
  -2   2  16   13.86    1.85
  -2   2  16   13.37    2.66
   2  -2 -16    4.93    2.05
   2  -2 -15   76.71    4.36
  -2   2  15   67.60    6.04
   2  -2 -15   71.01    4.44
  -2   2  15   75.23    4.93
   2  -2 -15   62.71    5.63
  -2   2  14  112.14    7.59
   2  -2 -14   99.56    7.22
  -2   2  14  118.62    5.65
   2  -2 -14  107.43    5.78
  -2   2  13  122.32    7.99
   2  -2 -13  117.21    7.59
  -2   2  13  126.70    6.11
   2  -2 -13  125.16    6.31
  -2   2  12    7.41    3.09
   2  -2 -12    2.30    2.14
   2  -2 -12    4.11    1.39
  -2   2  12    3.79    1.27
  -2   2  11   26.73    3.61
  -2   2  11   25.32    1.81
  -2   2  10  408.25   18.29
   2  -2  -9  129.45    6.41
  -2   2   9  140.92    6.32
   2  -2  -8   81.84    4.42
   2  -2  -8   88.40    4.49
  -2   2   8   88.03    5.78
   2  -2  -7  777.01   35.05
   2  -2  -7  764.56   35.03
  -2   2   7  839.96   35.71
   2  -2  -6  278.34   13.45
   2  -2  -6  293.18   13.45
  -2   2   6  312.26   13.98
   2  -2  -5    4.13    1.42
   2  -2  -5    1.25    1.37
   2  -2  -4   43.49    2.86
   2  -2  -4   38.92    2.83
   2  -2  -3  256.73   11.25
   2  -2  -3  231.04   11.36
   2  -2  -3  239.66   11.36
   2  -2  -3  266.56   11.38
  -2   2   3  216.74   11.27
   2  -2  -2 3113.15  139.30
  -2   2   2 3236.78  139.48
   2  -2  -1 2449.45   99.79
   2  -2  -1 2187.76   99.38
   2  -2  -1 2238.80   99.35
   2  -2  -1 2234.29   99.63
   2  -2   0 3239.05  148.42
   2  -2   0 3473.60  148.15
   2  -2   0 3375.06  148.14
   2  -2   0 3321.41  148.33
   2  -2   0 3329.96  148.25
   2  -2   1    2.22    1.64
   2  -2   1    1.86    1.30
   2  -2   1    1.48    1.53
   2  -2   1    0.94    1.11
   2  -2   2 1207.04   52.91
   2  -2   2 1132.84   52.83
   2  -2   2 1178.92   52.84
   2  -2   2 1243.55   53.01
   2  -2   3 1366.61   59.85
   2  -2   3 1310.78   59.78
   2  -2   3 1253.02   59.86
   2  -2   3 1400.83   59.95
  -2   2  -3 1451.42   60.52
   2  -2   4    4.33    1.69
   2  -2   4    3.70    1.71
  -2   2  -4    3.93    3.38
   2  -2   5    1.39    1.91
  -2   2  -5    3.02    4.58
   2  -2   5   -1.17    1.86
   2  -2   5    1.31    1.29
   2  -2   6   59.92    3.34
   2  -2   6   49.33    2.74
   2  -2   6   48.49    3.27
   2  -2   6   58.70    3.11
   2  -2   7  169.64    7.61
   2  -2   7  157.78    7.90
   2  -2   8    4.89    1.04
   2  -2   9   88.36    4.37
   2  -2  10    7.96    1.28
  -2   2 -10   11.98    1.55
   2  -2  10    7.19    1.32
   2  -2  10    8.00    1.65
   2  -2  11   50.90    3.04
  -2   2 -11   52.84    3.25
   2  -2  11   56.98    3.03
   2  -2  11   47.00    3.26
   2  -2  12    3.13    1.29
   2  -2  12    1.34    1.79
  -2   2 -12    5.78    1.64
   2  -2  12    5.42    1.50
   2  -2  13    0.17    1.30
   2  -2  13    1.02    1.32
  -2   2 -13    1.91    2.58
   2  -2  13    2.67    1.76
  -2   2 -13    0.89    1.64
   2  -2  13   -1.02    1.44
   2  -2  14  377.31   18.18
   2  -2  14  395.95   18.25
   2  -2  14  429.30   18.42
   2  -2  14  425.85   18.23
  -2   2 -14  402.26   18.34
   2  -2  15    2.30    1.59
   2  -2  15    2.23    1.40
   2  -2  15    1.32    1.19
  -2   2 -15    0.55    1.53
  -2   2 -16    7.08    1.62
   2  -2  16   11.67    1.51
   2  -2  16   11.48    1.75
  -2   2 -17   15.32    1.61
   2  -2  17   15.92    1.50
   2  -2  17   15.89    1.61
   2  -2  18    2.64    0.93
  -2   2 -18    3.16    0.99
   2  -2  18    4.17    1.27
  -2   2 -18    3.97    1.01
  -2   2 -19    1.61    0.69
   2  -2  19    1.28    0.85
  -2   2 -19    1.47    0.66
   2  -1 -21    3.43    0.77
  -2   1  21    2.93    0.86
   2  -1 -20    1.82    1.14
  -2   1  20    2.42    1.27
  -2   1  20    3.17    0.93
  -2   1  19   46.27    3.29
   2  -1 -19   49.11    2.97
   2  -1 -19   50.46    3.08
  -2   1  19   57.20    2.92
  -2   1  18   18.51    2.54
   2  -1 -18   19.78    2.02
   2  -1 -18   22.87    2.12
  -2   1  18   17.92    1.84
  -2   1  17   25.35    3.04
  -2   1  17   33.21    2.34
   2  -1 -17   29.26    2.52
   2  -1 -17   30.89    2.60
   2  -1 -16   48.20    3.17
  -2   1  16   36.98    4.46
  -2   1  16   48.03    3.69
  -2   1  16   49.71    3.02
   2  -1 -16   33.25    4.27
   2  -1 -16   49.55    3.23
   2  -1 -15   32.91    2.69
  -2   1  15   38.01    4.40
   2  -1 -15   34.50    2.92
  -2   1  15   31.54    3.31
   2  -1 -15   31.03    3.89
  -2   1  14    9.66    3.35
   2  -1 -14   12.62    1.97
  -2   1  14   16.07    2.64
  -2   1  14   16.23    1.77
   2  -1 -14   11.21    2.89
  -2   1  13   37.65    4.23
  -2   1  13   44.33    2.55
   2  -1 -13   34.43    2.68
  -2   1  12   30.54    3.74
   2  -1 -12   28.51    3.28
  -2   1  12   26.11    2.03
   2  -1 -12   29.26    2.23
   2  -1 -11  224.89   12.11
  -2   1  11  242.99   12.30
  -2   1  11  236.40   10.80
  -2   1  10   64.34    3.44
   2  -1 -10   76.50    4.77
  -2   1  10   74.75    5.06
  -2   1   9   38.61    2.23
   2  -1  -9   39.69    3.29
  -2   1   8   84.65    4.21
   2  -1  -8  107.27    5.47
   2  -1  -7 1030.43   46.38
   2  -1  -7 1042.30   46.37
   2  -1  -7 1088.96   46.99
   2  -1  -6    1.64    1.22
   2  -1  -6    3.30    1.23
   2  -1  -5  210.84   10.47
   2  -1  -5  228.16   10.56
   2  -1  -5  227.57   10.52
   2  -1  -4  570.30   27.59
   2  -1  -4  663.10   27.71
  -2   1   4  652.05   27.99
   2  -1  -4  610.73   27.65
   2  -1  -3    2.22    1.36
   2  -1  -3   -0.18    1.33
   2  -1  -3    0.88    1.06
   2  -1  -3    0.47    1.17
   2  -1  -2   21.48    2.02
   2  -1  -2   20.18    1.70
   2  -1  -1   62.30    3.74
   2  -1  -1   62.36    3.54
   2  -1  -1   65.66    3.19
   2  -1  -1   62.30    3.15
   2  -1   0  257.15   12.51
   2  -1   0  268.65   12.10
   2  -1   0  279.32   12.12
   2  -1   0  255.05   12.42
   2  -1   1 1697.52   66.65
   2  -1   1 1524.48   66.35
   2  -1   1 1460.08   66.28
   2  -1   1 1410.28   66.43
   2  -1   1 1469.98   66.39
   2  -1   2   25.53    1.82
   2  -1   2   24.26    2.02
   2  -1   2   29.94    2.32
   2  -1   2   26.20    2.17
   2  -1   2   27.37    1.90
   2  -1   3 1570.48   70.65
  -2   1  -3 1730.55   71.26
   2  -1   3 1547.32   70.50
   2  -1   3 1611.33   70.69
   2  -1   4   28.92    2.05
  -2   1  -4   28.25    3.43
   2  -1   4   32.34    2.41
   2  -1   4   35.76    2.44
   2  -1   5   56.35    3.12
  -2   1  -5   54.46    4.62
   2  -1   5   52.79    3.24
   2  -1   5   48.06    3.23
   2  -1   6   47.77    3.05
  -2   1  -6   55.76    5.15
   2  -1   6   49.06    2.91
   2  -1   6   43.64    2.42
   2  -1   6   45.82    2.93
  -2   1  -7   50.31    4.73
   2  -1   7   39.15    2.28
   2  -1   7   45.44    3.00
  -2   1  -8   96.64    5.94
   2  -1   8   88.61    4.49
  -2   1  -9   20.14    3.57
   2  -1   9   15.45    1.50
   2  -1  10    8.37    1.32
   2  -1  10    8.05    1.99
   2  -1  10    9.36    1.63
  -2   1 -10   11.48    2.84
   2  -1  10    7.46    1.83
  -2   1 -10   10.06    1.53
   2  -1  11    6.82    1.26
  -2   1 -11    3.29    1.55
   2  -1  11    4.96    1.68
   2  -1  12   84.66    4.67
  -2   1 -12   96.54    4.88
   2  -1  12   86.22    5.02
   2  -1  12   97.25    4.73
   2  -1  13   32.54    2.24
   2  -1  13   34.27    2.49
  -2   1 -13   33.08    2.59
   2  -1  13   33.56    2.76
   2  -1  14    5.32    1.62
   2  -1  14    4.33    1.94
  -2   1 -14    8.44    1.74
   2  -1  15    8.74    1.69
   2  -1  15   10.66    1.91
   2  -1  15   11.12    1.53
  -2   1 -15    9.51    1.78
   2  -1  16    5.03    1.45
  -2   1 -16    4.33    1.64
   2  -1  16    6.37    1.70
   2  -1  17   54.95    2.98
  -2   1 -17   45.84    3.03
   2  -1  17   51.35    3.09
   2  -1  18    5.95    1.12
   2  -1  18    4.50    1.20
  -2   1 -18    3.33    1.20
  -2   1 -19    7.22    0.99
  -2   1 -19    7.04    0.97
   2  -1  19    5.84    1.22
  -2   1 -20    2.93    0.57
   2  -1  20    2.62    0.67
  -2   0  21    1.10    0.66
   2   0 -20    2.08    1.01
  -2   0  20    2.42    1.05
  -2   0  19    6.22    1.17
   2   0 -19    4.93    1.40
  -2   0  19    6.25    1.54
   2   0 -19    5.01    1.16
  -2   0  18    4.72    1.36
   2   0 -18    6.84    1.69
  -2   0  18    3.04    1.84
   2   0 -18    5.09    1.16
   2   0 -18    5.19    1.40
  -2   0  17    4.06    1.42
   2   0 -17    4.75    1.58
   2   0 -17    5.74    1.82
  -2   0  17    0.74    2.14
  -2   0  16    5.59    1.58
  -2   0  16    0.31    2.19
   2   0 -16    2.45    1.54
   2   0 -16    5.06    1.90
   2   0 -16    1.23    2.20
   2   0 -15   42.42    3.04
  -2   0  15   53.98    2.92
  -2   0  15   42.89    3.58
   2   0 -15   40.59    2.87
  -2   0  15   27.78    4.09
   2   0 -15   30.90    3.86
   2   0 -14  160.74    8.14
  -2   0  14  163.75    7.90
  -2   0  14  165.76    8.48
   2   0 -14  170.47    8.00
  -2   0  14  170.43    9.63
   2   0 -14  148.27    9.44
   2   0 -13  118.38    7.64
  -2   0  13  120.96    6.65
   2   0 -13  123.12    6.32
  -2   0  13  118.62    7.64
  -2   0  13  130.22    6.14
   2   0 -12  108.35    6.90
  -2   0  12  113.75    5.96
  -2   0  12  114.39    7.01
  -2   0  12  109.46    5.44
   2   0 -12  109.04    5.67
   2   0 -11   18.01    2.57
  -2   0  11   17.74    2.94
  -2   0  11   10.53    1.42
   2   0 -11   16.30    1.64
  -2   0  10    3.28    2.53
  -2   0  10    1.35    1.08
   2   0 -10    1.76    1.81
  -2   0   9   31.16    1.97
   2   0  -9   30.17    2.39
   2   0  -9   35.16    3.03
   2   0  -8  274.81   12.66
  -2   0   8  263.49   12.13
  -2   0   8  285.68   13.36
   2   0  -8  274.52   13.08
   2   0  -7   54.05    3.00
   2   0  -7   33.58    3.15
   2   0  -6  558.53   25.75
   2   0  -6  565.29   25.74
   2   0  -6  561.05   25.73
   2   0  -6  619.01   26.06
   2   0  -6  639.32   26.32
   2   0  -5   48.45    2.69
   2   0  -5   45.49    2.64
   2   0  -5   46.67    2.61
   2   0  -5   52.35    2.68
   2   0  -5   51.71    2.83
   2   0  -4  219.65    9.98
   2   0  -4  213.41    9.95
   2   0  -4  203.99    9.91
   2   0  -4  219.51   10.00
   2   0  -4  210.18    9.92
   2   0  -4  226.92   10.10
   2   0  -3   51.84    3.01
   2   0  -3   56.89    3.03
   2   0  -3   49.60    2.89
   2   0  -3   55.06    2.93
   2   0  -3   45.94    2.94
   2   0  -2  306.30   13.79
   2   0  -2  297.85   13.85
   2   0  -1    3.20    1.32
   2   0   0  146.83    7.03
   2   0   0  142.92    6.91
   2   0   1  118.22    6.02
   2   0   1  122.71    5.94
   2   0   2  374.55   16.77
   2   0   2  362.79   16.87
   2   0   2  354.93   16.86
   2   0   2  383.12   16.75
  -2   0  -3  138.46    6.43
   2   0   3  105.63    5.45
   2   0   3  109.84    5.54
   2   0   3  109.89    5.72
   2   0   3   96.86    5.64
   2   0   3  136.96    5.64
  -2   0  -4   42.75    3.42
   2   0   4   36.12    2.13
   2   0   4   31.77    2.16
   2   0   4   33.86    2.45
   2   0   4   33.24    2.44
   2   0   4   44.93    2.45
   2   0   5    4.35    0.96
  -2   0  -5    5.23    2.68
   2   0   5    4.10    1.41
   2   0   5    4.67    1.40
   2   0   5    3.38    1.46
  -2   0  -6  128.68    7.47
   2   0   6  128.30    6.56
  -2   0  -7   26.43    3.98
   2   0   7   19.77    1.54
   2   0   7   26.09    2.60
  -2   0  -8    9.89    3.23
   2   0   8    9.41    1.24
   2   0   8   10.95    2.26
  -2   0  -9  372.94   16.85
   2   0   9  329.65   15.17
   2   0   9  338.09   15.96
  -2   0 -10   86.49    5.65
   2   0  10   79.56    4.95
   2   0  10   79.40    4.08
   2   0  11   15.86    1.64
   2   0  11   11.19    2.31
   2   0  11   14.70    1.93
   2   0  11   11.52    2.18
  -2   0 -11   12.86    2.95
  -2   0 -11   15.92    1.71
   2   0  11   14.25    1.61
   2   0  12    6.84    1.78
   2   0  12    3.61    2.24
  -2   0 -12    7.47    2.69
  -2   0 -12    4.76    1.59
   2   0  12    5.35    1.40
  -2   0 -13   29.78    2.59
  -2   0 -13   33.65    3.90
   2   0  13   35.10    2.82
  -2   0 -14    6.69    1.72
  -2   0 -14    2.42    2.60
   2   0  14    5.28    2.06
   2   0  15   62.11    3.96
  -2   0 -15   61.20    3.75
   2   0  16   43.79    3.04
  -2   0 -16   40.32    2.87
   2   0  17   38.55    2.65
  -2   0 -17   32.68    2.55
  -2   0 -18    1.92    0.94
  -2   0 -18    0.07    1.27
   2   0  18    1.87    1.33
  -2   0 -19   16.37    1.46
   2   0  20    0.69    0.92
  -2   0 -20    1.71    0.73
  -2   0 -20    1.57    0.71
   2   1 -20    1.08    0.85
  -2  -1  20    1.92    0.85
  -2  -1  20    0.94    0.93
  -2  -1  19   14.94    1.36
  -2  -1  19   14.30    1.66
   2   1 -19   18.11    1.63
   2   1 -18    1.73    1.12
   2   1 -18    1.13    1.44
  -2  -1  18    0.97    1.17
  -2  -1  18    2.92    1.67
   2   1 -18    2.95    1.10
   2   1 -17   10.74    1.55
   2   1 -17    9.40    1.92
   2   1 -17   14.43    1.59
  -2  -1  17   14.88    1.63
  -2  -1  17   13.56    2.24
  -2  -1  16   14.97    2.50
   2   1 -16   13.38    1.80
  -2  -1  16   16.99    1.80
   2   1 -16   14.67    2.14
   2   1 -15    2.24    1.84
   2   1 -15    1.01    2.11
  -2  -1  15    3.26    2.24
   2   1 -15    3.26    1.50
  -2  -1  15    4.47    1.58
  -2  -1  15    0.85    2.37
   2   1 -14  157.72    7.99
   2   1 -14  147.99    9.26
  -2  -1  14  174.04    8.36
   2   1 -14  155.72    7.81
  -2  -1  14  171.77    7.80
  -2  -1  14  145.94    9.11
   2   1 -13   16.11    2.00
   2   1 -13   18.47    2.95
  -2  -1  13   11.32    2.32
   2   1 -13   14.22    1.64
  -2  -1  13    6.15    1.64
  -2  -1  13   20.12    3.17
  -2  -1  12   99.37    6.42
  -2  -1  12  102.10    5.50
   2   1 -12   88.22    6.26
   2   1 -12  102.94    5.26
  -2  -1  12  101.63    5.05
  -2  -1  11   16.49    2.92
  -2  -1  11   22.00    2.32
  -2  -1  11   23.58    1.74
   2   1 -11   18.97    1.92
   2   1 -11   19.78    2.69
   2   1 -10    0.31    1.65
  -2  -1  10    2.21    2.33
[truncated: 1,769,162 more chars]
