# Supplementary material for: One-pot, room-temperature conversion of dinitrogen to ammonium chloride at a main-group element
Source: Springer Nature journal article supplement (doi:10.1038/s41557-020-0520-6), 2020-09-14
Supplement: 41557_2020_520_MOESM13_ESM.mol [file 41557_2020_520_MOESM13_ESM.mol]

nchem.20051168A-comp5.mol
  ChemDraw07032002062D

 70 76  0  0  0  0  0  0  0  0999 V2000
   -1.1940    1.4759    0.0000 B   0  0  0  0  0  0  0  0  0  0  0  0
   -0.6077    0.8101    0.0000 N   0  0  0  0  0  0  0  0  0  0  0  0
    0.1113    1.0483    0.0000 H   0  0  0  0  0  0  0  0  0  0  0  0
   -0.6097   -0.1731    0.0000 K   0  0  0  0  0  0  0  0  0  0  0  0
   -0.0883    2.7450    0.0000 N   0  0  0  0  0  0  0  0  0  0  0  0
   -0.8939    2.5671    0.0000 C   0  4  0  0  0  0  0  0  0  0  0  0
   -1.3119    3.2784    0.0000 C   0  0  0  0  0  0  0  0  0  0  0  0
   -0.7647    3.8958    0.0000 C   0  0  0  0  0  0  0  0  0  0  0  0
   -0.0084    3.5661    0.0000 C   0  0  0  0  0  0  0  0  0  0  0  0
    0.8165    3.5725    0.0000 C   0  0  0  0  0  0  0  0  0  0  0  0
    0.3985    4.2837    0.0000 C   0  0  0  0  0  0  0  0  0  0  0  0
   -1.9831    3.7581    0.0000 C   0  0  0  0  0  0  0  0  0  0  0  0
   -2.0630    2.9370    0.0000 C   0  0  0  0  0  0  0  0  0  0  0  0
    0.6707    2.4215    0.0000 C   0  0  0  0  0  0  0  0  0  0  0  0
    0.7700    1.6025    0.0000 C   0  0  0  0  0  0  0  0  0  0  0  0
    1.5289    1.2790    0.0000 C   0  0  0  0  0  0  0  0  0  0  0  0
    2.1885    1.7745    0.0000 C   0  0  0  0  0  0  0  0  0  0  0  0
    2.0892    2.5935    0.0000 C   0  0  0  0  0  0  0  0  0  0  0  0
    1.3303    2.9170    0.0000 C   0  0  0  0  0  0  0  0  0  0  0  0
    1.2285    3.7037    0.0000 C   0  0  0  0  0  0  0  0  0  0  0  0
    0.4695    4.0272    0.0000 C   0  0  0  0  0  0  0  0  0  0  0  0
    1.8881    4.1992    0.0000 C   0  0  0  0  0  0  0  0  0  0  0  0
    0.4133    1.2696    0.0000 C   0  0  0  0  0  0  0  0  0  0  0  0
    0.6270    0.4727    0.0000 C   0  0  0  0  0  0  0  0  0  0  0  0
   -0.3837    1.4829    0.0000 C   0  0  0  0  0  0  0  0  0  0  0  0
   -3.3651    1.7004    0.0000 C   0  0  0  0  0  0  0  0  0  0  0  0
   -2.5620    1.8888    0.0000 C   0  0  0  0  0  0  0  0  0  0  0  0
   -1.9972    1.2875    0.0000 C   0  0  0  0  0  0  0  0  0  0  0  0
   -2.2355    0.4977    0.0000 C   0  0  0  0  0  0  0  0  0  0  0  0
   -3.0387    0.3092    0.0000 C   0  0  0  0  0  0  0  0  0  0  0  0
   -3.6035    0.9106    0.0000 C   0  0  0  0  0  0  0  0  0  0  0  0
   -3.2771   -0.4806    0.0000 C   0  0  0  0  0  0  0  0  0  0  0  0
   -1.6707   -0.1037    0.0000 C   0  0  0  0  0  0  0  0  0  0  0  0
   -2.3236    2.6786    0.0000 C   0  0  0  0  0  0  0  0  0  0  0  0
   -3.9299    2.3017    0.0000 C   0  0  0  0  0  0  0  0  0  0  0  0
    1.2155   -1.5404    0.0000 B   0  0  0  0  0  0  0  0  0  0  0  0
    0.6292   -0.8746    0.0000 N   0  0  0  0  0  0  0  0  0  0  0  0
   -0.1113   -1.0483    0.0000 H   0  0  0  0  0  0  0  0  0  0  0  0
    0.4665    0.3736    0.0000 K   0  0  0  0  0  0  0  0  0  0  0  0
    0.0883   -2.7450    0.0000 N   0  0  0  0  0  0  0  0  0  0  0  0
    0.8939   -2.5671    0.0000 C   0  4  0  0  0  0  0  0  0  0  0  0
    1.3119   -3.2784    0.0000 C   0  0  0  0  0  0  0  0  0  0  0  0
    0.7647   -3.8958    0.0000 C   0  0  0  0  0  0  0  0  0  0  0  0
    0.0084   -3.5661    0.0000 C   0  0  0  0  0  0  0  0  0  0  0  0
   -0.8165   -3.5725    0.0000 C   0  0  0  0  0  0  0  0  0  0  0  0
   -0.3985   -4.2837    0.0000 C   0  0  0  0  0  0  0  0  0  0  0  0
    1.9831   -3.7581    0.0000 C   0  0  0  0  0  0  0  0  0  0  0  0
    2.0630   -2.9370    0.0000 C   0  0  0  0  0  0  0  0  0  0  0  0
   -0.6707   -2.4215    0.0000 C   0  0  0  0  0  0  0  0  0  0  0  0
   -0.7700   -1.6025    0.0000 C   0  0  0  0  0  0  0  0  0  0  0  0
   -1.5289   -1.2790    0.0000 C   0  0  0  0  0  0  0  0  0  0  0  0
   -2.1885   -1.7745    0.0000 C   0  0  0  0  0  0  0  0  0  0  0  0
   -2.0892   -2.5935    0.0000 C   0  0  0  0  0  0  0  0  0  0  0  0
   -1.3303   -2.9170    0.0000 C   0  0  0  0  0  0  0  0  0  0  0  0
   -1.2285   -3.7037    0.0000 C   0  0  0  0  0  0  0  0  0  0  0  0
   -0.4695   -4.0272    0.0000 C   0  0  0  0  0  0  0  0  0  0  0  0
   -1.8881   -4.1992    0.0000 C   0  0  0  0  0  0  0  0  0  0  0  0
   -0.4133   -1.2696    0.0000 C   0  0  0  0  0  0  0  0  0  0  0  0
   -0.6270   -0.4727    0.0000 C   0  0  0  0  0  0  0  0  0  0  0  0
    0.3837   -1.4829    0.0000 C   0  0  0  0  0  0  0  0  0  0  0  0
    3.3651   -1.7004    0.0000 C   0  0  0  0  0  0  0  0  0  0  0  0
    2.5620   -1.8888    0.0000 C   0  0  0  0  0  0  0  0  0  0  0  0
    1.9972   -1.2875    0.0000 C   0  0  0  0  0  0  0  0  0  0  0  0
    2.2355   -0.4977    0.0000 C   0  0  0  0  0  0  0  0  0  0  0  0
    3.0387   -0.3092    0.0000 C   0  0  0  0  0  0  0  0  0  0  0  0
    3.6035   -0.9106    0.0000 C   0  0  0  0  0  0  0  0  0  0  0  0
    3.2771    0.4806    0.0000 C   0  0  0  0  0  0  0  0  0  0  0  0
    1.6707    0.1037    0.0000 C   0  0  0  0  0  0  0  0  0  0  0  0
    2.3236   -2.6786    0.0000 C   0  0  0  0  0  0  0  0  0  0  0  0
    3.9299   -2.3017    0.0000 C   0  0  0  0  0  0  0  0  0  0  0  0
 28  1  1  0      
  1  6  4  0      
  1  2  4  0      
  2  3  1  0      
  2  4  1  0      
  5  6  1  0      
  6  7  1  0      
  7  8  1  0      
  8  9  1  0      
  5  9  1  0      
  9 10  1  0      
  9 11  1  0      
  7 12  1  0      
  7 13  1  0      
 14 15  1  0      
 15 16  2  0      
 16 17  1  0      
 17 18  2  0      
 18 19  1  0      
 14 19  2  0      
 20 21  1  0      
 20 22  1  0      
 19 20  1  0      
 23 24  1  0      
 23 25  1  0      
 15 23  1  0      
  5 14  1  0      
 26 27  2  0      
 27 28  1  0      
 28 29  2  0      
 29 30  1  0      
 30 31  2  0      
 31 26  1  0      
 30 32  1  0      
 29 33  1  0      
 27 34  1  0      
 26 35  1  0      
 63 36  1  0      
 36 41  4  0      
 36 37  4  0      
 37 38  1  0      
 37 39  1  0      
 40 41  1  0      
 41 42  1  0      
 42 43  1  0      
 43 44  1  0      
 40 44  1  0      
 44 45  1  0      
 44 46  1  0      
 42 47  1  0      
 42 48  1  0      
 49 50  1  0      
 50 51  2  0      
 51 52  1  0      
 52 53  2  0      
 53 54  1  0      
 49 54  2  0      
 55 56  1  0      
 55 57  1  0      
 54 55  1  0      
 58 59  1  0      
 58 60  1  0      
 50 58  1  0      
 40 49  1  0      
 61 62  2  0      
 62 63  1  0      
 63 64  2  0      
 64 65  1  0      
 65 66  2  0      
 66 61  1  0      
 65 67  1  0      
 64 68  1  0      
 62 69  1  0      
 61 70  1  0      
  2 39  1  0      
 37  4  1  0      
M  RAD  2   6   2  41   2
M  END
